# Supplementary material for: Kryptoracemic compound hunting and frequency in the Cambridge Structural Database
Source: Royal Society of Chemistry journal article supplement (doi:10.1039/d0ce00303d), 2020-01-01
Supplement: d0ce00303d1.zip [file d0ce00303d1.zip]

## Sheet: Feuil6
Nombre de Column2	Étiquettes de colonnes
Étiquettes de lignes	C2	C2/c	Cc	Fdd2	I2/c	I-4	Ia	Iba2	P-1	P21/c	P21/n	P21212	P212121	P-421c	Pbca	Pbcn	Pca21	Pccn	Pna21	Pnma	Total général
Groupe2	0.00558659	0	0.00558659	0.0111732	0	0.00558659	0.0167598	0.00558659	0.357542	0.0111732	0.00558659	0.00558659	0	0	0	0	0	0	0.00558659	0	0.435754
C1	0	0	0	0	0	0	0.00558659	0	0	0	0	0	0	0	0	0	0	0	0	0	0.00558659
P1	0.00558659	0	0.00558659	0.0111732	0	0.00558659	0.0111732	0.00558659	0.357542	0.0111732	0.00558659	0.00558659	0	0	0	0	0	0	0.00558659	0	0.430168
C2	0	0.0223464	0	0.0111732	0.0111732	0	0	0	0	0	0	0	0	0	0	0	0	0	0	0	0.0446927
C2	0	0.0223464	0	0.0111732	0.0111732	0	0	0	0	0	0	0	0	0	0	0	0	0	0	0	0.0446927
P21	0	0	0	0	0	0	0	0	0	0.256983	0.150838	0	0.00558659	0	0	0	0.0167598	0	0.00558659	0	0.435754
P21	0	0	0	0	0	0	0	0	0	0.256983	0.150838	0	0.00558659	0	0	0	0.0167598	0	0.00558659	0	0.435754
Groupe1	0	0	0	0	0	0	0	0	0	0	0	0	0	0.00558659	0	0.0111732	0	0.0111732	0	0	0.027933
P21212	0	0	0	0	0	0	0	0	0	0	0	0	0	0.00558659	0	0.00558659	0	0.0111732	0	0	0.0223464
P21221	0	0	0	0	0	0	0	0	0	0	0	0	0	0	0	0.00558659	0	0	0	0	0.00558659
P212121	0	0	0	0	0	0	0	0	0	0	0	0	0	0	0.0502793	0	0	0	0	0.00558659	0.0558659
P212121	0	0	0	0	0	0	0	0	0	0	0	0	0	0	0.0502793	0	0	0	0	0.00558659	0.0558659
Total général	0.00558659	0.0223464	0.00558659	0.0223464	0.0111732	0.00558659	0.0167598	0.00558659	0.357542	0.268156	0.156425	0.00558659	0.00558659	0.00558659	0.0502793	0.0111732	0.0167598	0.0111732	0.0111732	0.00558659	1

## Sheet: platon
Column2	SG	Column5	Column6	Column7	Column8	Column9	Column10.1	%	New SG
ABAPUQ	P1	aP=>aP	1.0	0.000	0.00	0.500	1.00	0.94	P-1
ABEGET	P1	aP=>aP	1.0	0.000	0.00	0.500	1.00	1	P-1
ABIVIT	P21	mP=>mP	0.5	0.000	0.00	0.500	1.00	1	P21/n
ACUBAC	P1	aP=>aP	1.0	0.000	0.00	0.500	1.00	0.9	P-1
AKOXIH	P1	aP=>mP	1.0	0.000	0.03	0.500	1.00	1	P21/c
AWIJAT	P212121	oP=>oP	0.3	0.000	0.00	0.500	1.00	0.8	Pbca
BAXJOC	P21	mP=>mP	0.5	0.000	0.00	0.500	1.00	0.97	P21/c
BEXGUI	P21	mP=>mP	0.5	0.000	0.00	0.500	1.00	0.93	P21/c
BHXOCO	P1	aP=>aP	1.0	0.000	0.00	0.500	1.00	0.95	P-1
BISCEO	P21	mP=>mP	0.5	0.000	0.00	0.500	1.00	1	P21/c
BIWYIR	P1	aP=>mP	1.0	0.000	0.16	0.500	1.00	1	P21/c
CABXIM	P21	mP=>mP	0.5	0.000	0.00	0.500	1.00	1	P21/c
CASXEB	P1	aP=>aP	1.0	0.000	0.00	0.500	1.00	1	P-1
CAWQEW	P21	mP=>mP	0.5	0.000	0.00	0.500	1.00	0.81	P21/c
CEVQIG	P21	mP=>mP	0.5	0.000	0.00	0.500	1.00	1	P21/n
CEVQOM	P21	mP=>mP	0.5	0.000	0.00	0.500	1.00	1	P21/c
CIZGIC	P21	mP=>mP	0.5	0.000	0.00	0.500	1.00	0.81	P21/n
COBLIQ	P21	mP=>mP	0.5	0.000	0.00	0.500	1.00	0.86	P21/c
COMCIS	P21	mP=>mP	0.5	0.000	0.00	0.500	1.00	0.96	P21/c
CUTGAZ	P21	mP=>oP	0.5	0.000	0.97	0.124	1.00	1	Pca21
DAGXUH	P1	aP=>aP	1.0	0.000	0.00	0.500	1.00	1	P-1
DATPAQ01	P21	mP=>mP	0.5	0.000	0.00	0.500	1.00	1	P21/n
DEFQEK	P212121	oP=>oP	0.3	0.000	0.00	0.500	1.00	1	Pbca
DEKYOJ	P21	mP=>mP	0.5	0.000	0.00	0.500	1.00	1	P21/c
DICREN	P1	aP=>aP	1.0	0.000	0.00	0.500	1.00	0.96	P-1
DIPNIC	P21	mP=>oP	0.5	0.000	0.12	0.010	1.00	1	Pna21
DIXPUW	P21	mP=>mP	0.5	0.000	0.00	0.500	1.00	0.86	P21/c
DIZLOP	P1	aP=>aP	1.0	0.000	0.00	0.500	1.00	0.83	P-1
DOBXUQ	P21	mP=>mP	0.5	0.000	0.00	0.500	1.00	1	P21/c
EGOXEG	P1	aP=>aP	1.0	0.000	0.00	0.500	1.00	0.98	P-1
EKIKIS	P21212	oP=>oP	0.3	0.000	0.00	0.500	1.00	0.97	Pbcn
EKOKOE	P1	aP=>aP	1.0	0.000	0.00	0.500	1.00	1	P-1
ELAMAH	P212121	oP=>oP	0.3	0.000	0.00	0.500	1.00	0.85	Pnma
EMOYIO	P21	mP=>mP	0.5	0.000	0.00	0.500	1.00	1	P21/c
ENIPUO	P1	aP=>aP	1.0	0.000	0.00	0.500	1.00	0.9	P-1
ETAVUS	P1	aP=>aP	1.0	0.000	0.00	0.500	1.00	0.95	P-1
FALQIT	C2	mC=>mC	0.3	0.000	0.00	0.500	1.00	1	C2/c
FAZSOR	P21	mP=>mP	0.5	0.000	0.00	0.500	1.00	0.87	P21/c
FEJLOW	P21	mP=>mP	0.5	0.000	0.00	0.500	1.00	0.85	P21/c
FEKQIW	P1	aP=>aP	1.0	0.000	0.00	0.500	1.00	1	P-1
FIWJOK	P1	aP=>aP	1.0	0.000	0.00	0.500	1.00	1	P-1
FURQAM01	P21	mP=>mP	0.5	0.000	0.00	0.500	1.00	0.97	P21/n
FUVYIG	P1	aP=>aP	1.0	0.000	0.00	0.500	1.00	0.95	P-1
GAGFAX	P1	aP=>aP	1.0	0.000	0.00	0.500	1.00	1	P-1
GENLET01	P21	mP=>mP	0.5	0.000	0.00	0.500	1.00	0.99	P21/n
GEWQAC	P21	mP=>mP	0.5	0.000	0.00	0.500	1.00	1	P21/c
GILYEG	P21	mP=>mP	0.5	0.000	0.00	0.500	1.00	1	P21/n
GIWRIO	P1	aP=>aP	1.0	0.000	0.00	0.500	1.00	1	P-1
GIZSOZ	P21	mP=>mP	0.5	0.000	0.00	0.500	1.00	0.8	P21/c
HACKOO	P1	aP=>aP	1.0	0.000	0.00	0.500	1.00	0.96	P-1
HAPTIE	P21	mP=>mP	0.5	0.000	0.00	0.500	1.00	0.92	P21/n
HAPTOK	C2	mC=>mC	0.3	0.000	0.00	0.500	1.00	0.89	C2/c
HEQVAC	P212121	oP=>oP	0.3	0.000	0.00	0.500	1.00	0.97	Pbca
HIDJUB	P21	mP=>oP	0.5	0.000	0.63	0.249	1.00	0.93	P212121
HIFMUG	P21	mP=>mP	0.5	0.000	0.00	0.500	1.00	0.98	P21/n
HIGGEL	P1	aP=>aP	1.0	0.000	0.00	0.500	1.00	1	P-1
HONZES	C2	mC=>oF	0.3	0.000	0.00	0.073	0.50	1	Fdd2
HOVDAY	P1	aP=>aP	1.0	0.000	0.00	0.500	1.00	0.82	P-1
HUXHOX	P212121	oP=>oP	0.3	0.000	0.00	0.500	1.00	1	Pbca
IBIFOP	P1	aP=>aP	1.0	0.000	0.00	0.500	1.00	1	P-1
IBOVEA	P21	mP=>mP	0.5	0.000	0.00	0.500	1.00	1	P21/n
IFADOL	C1	aC=>mI	0.5	0.000	0.00	0.006	1.00	1	Ia
IHULUU	P1	aP=>aP	1.0	0.000	0.00	0.500	1.00	1	P-1
IJIHOZ	P1	aP=>aP	1.0	0.000	0.00	0.500	1.00	0.96	P-1
IQAREY01	P21	mP=>mP	0.5	0.000	0.00	0.500	1.00	1	P21/c
IVUGOW	P1	aP=>aP	1.0	0.000	0.00	0.500	1.00	0.91	P-1
IYEPAD	P21	mP=>mP	0.5	0.000	0.00	0.500	1.00	0.97	P21/c
JANYON	P21	mP=>oP	0.5	0.000	0.07	0.004	1.00	1	Pca21
JAPDAG	P21	mP=>mP	0.5	0.000	0.00	0.500	1.00	1	P21/c
JAYWUE	P21	mP=>mP	0.5	0.000	0.00	0.500	1.00	1	P21/c
JEGHUB	P1	aP=>aP	1.0	0.000	0.00	0.500	1.00	1	P-1
JISREI	P1	aP=>aP	1.0	0.000	0.00	0.500	1.00	0.98	P-1
JOBLOB	P1	aP=>aP	1.0	0.000	0.00	0.500	1.00	0.9	P-1
JOLMUU	P21	mP=>mP	0.5	0.000	0.00	0.500	1.00	1	P21/n
KABTIT	P21	mP=>mP	0.5	0.000	0.00	0.500	1.00	1	P21/n
KELQEZ	P1	aP=>aP	1.0	0.000	0.00	0.500	1.00	0.92	P-1
KOMKII	P21	mP=>mP	0.5	0.000	0.00	0.500	1.00	1	P21/n
KUSTOJ	P1	aP=>aP	1.0	0.000	0.00	0.500	1.00	1	P-1
LIKMEY	P1	aP=>aP	1.0	0.000	0.00	0.500	1.00	0.93	P-1
LIMHIZ	P212121	oP=>oP	0.3	0.000	0.00	0.500	1.00	1	Pbca
LIWMOW	P1	aP=>oP	1.0	0.000	0.00	0.064	1.00	1	P21212
LUQLUF	P1	aP=>aP	1.0	0.000	0.00	0.500	1.00	1	P-1
LUYMAV	P1	aP=>aP	1.0	0.000	0.00	0.500	1.00	1	P-1
MEZFAB	P1	aP=>mC	1.0	0.000	0.65	0.248	0.50	0.93	C2
MOZZEG	P1	aP=>aP	1.0	0.000	0.00	0.500	1.00	0.99	P-1
MUBYIR	P21	mP=>mP	0.5	0.000	0.00	0.500	1.00	1	P21/c
MUDQIN	P21	mP=>mP	0.5	0.000	0.00	0.500	1.00	1	P21/c
NATDUK	P1	aP=>aP	1.0	0.000	0.00	0.500	1.00	0.83	P-1
NIJGIW	C2	mC=>oF	0.3	0.000	0.01	0.060	0.50	1	Fdd2
NITSUH	P1	aP=>oP	1.0	0.000	0.00	0.017	1.00	1	Pna21
NIXFUY	P21	mP=>mP	0.5	0.000	0.00	0.500	1.00	0.9	P21/c
NOPMAH	P1	aP=>aP	1.0	0.000	0.00	0.500	1.00	0.97	P-1
NOTRET	P21	mP=>mP	0.5	0.000	0.00	0.500	1.00	0.91	P21/n
NUBKEA	P21	mP=>mP	0.5	0.000	0.00	0.500	1.00	1	P21/c
NUGVER	P1	aP=>tI	1.0	0.001	0.01	0.026	0.50	1	I-4
OHELIY	P21	mP=>mP	0.5	0.000	0.00	0.500	1.00	0.83	P21/c
ONANIC01	P1	aP=>aP	1.0	0.000	0.00	0.500	1.00	0.89	P-1
OREKUT	P21	mP=>mP	0.5	0.000	0.00	0.500	1.00	0.89	P21/c
PATXUF	P1	aP=>aP	1.0	0.000	0.00	0.500	1.00	0.98	P-1
PDTOMS11	P1	aP=>aP	1.0	0.000	0.00	0.500	1.00	1	P-1
PEDJAK	P21	mP=>mP	0.5	0.000	0.00	0.500	1.00	0.91	P21/n
PEGKUJ	P21	mP=>mP	0.5	0.000	0.00	0.500	1.00	0.91	P21/n
PESTOY	C2	mC=>mI	0.3	0.000	0.00	0.500	1.00	0.88	I2/c
PEYSIV	P21	mP=>mP	0.5	0.000	0.00	0.500	1.00	0.86	P21/c
PIHPUU	P21	mP=>mP	0.5	0.000	0.00	0.500	1.00	1	P21/c
PIKZOA	P1	aP=>aP	1.0	0.000	0.00	0.500	1.00	0.88	P-1
PITXUL	P21	mP=>mP	0.5	0.000	0.00	0.500	1.00	0.84	P21/n
POCSAE	P21	mP=>mP	0.5	0.000	0.00	0.500	1.00	0.9	P21/c
PUYXIS	P212121	oP=>oP	0.3	0.000	0.00	0.500	1.00	1	Pbca
QASWUD	P1	aP=>aP	1.0	0.000	0.00	0.500	1.00	1	P-1
QIYJIR	P21	mP=>mP	0.5	0.000	0.00	0.500	1.00	1	P21/n
QOMSUH	P21	mP=>mP	0.5	0.000	0.00	0.500	1.00	0.86	P21/c
QUDJUW	C2	mC=>mC	0.3	0.000	0.00	0.500	1.00	1	C2/c
RAKXEH	P1	aP=>aP	1.0	0.000	0.00	0.500	1.00	0.87	P-1
RENRIO	P21	mP=>mP	0.5	0.000	0.00	0.500	1.00	0.81	P21/n
RETYUM	P21	mP=>mP	0.5	0.000	0.00	0.500	1.00	0.97	P21/c
REXSIY	P1	aP=>aP	1.0	0.000	0.00	0.500	1.00	1	P-1
REZZOM	P21	mP=>mP	0.5	0.000	0.00	0.500	1.00	1	P21/c
RIGSEF	P1	aP=>aP	1.0	0.000	0.00	0.500	1.00	0.91	P-1
RILNIM	P1	aP=>oF	1.0	0.000	0.06	0.030	0.25	1	Fdd2
RIPDAW	P1	aP=>aP	1.0	0.000	0.00	0.500	1.00	0.94	P-1
RISNIS	P21	mP=>mP	0.5	0.000	0.00	0.500	1.00	0.98	P21/c
RUCXAQ	P1	aP=>aP	1.0	0.000	0.00	0.500	1.00	1	P-1
RUWHEX	P1	aP=>aP	1.0	0.000	0.00	0.500	1.00	0.87	P-1
SARZUG	P1	aP=>aP	1.0	0.000	0.00	0.500	1.00	1	P-1
SAXZAT	P21	mP=>mP	0.5	0.000	0.00	0.500	1.00	1	P21/n
SOQQOE	P1	aP=>aP	1.0	0.000	0.00	0.500	1.00	0.84	P-1
SOXWOR	P1	aP=>aP	1.0	0.000	0.00	0.500	1.00	1	P-1
TAKKAU	P21	mP=>mP	0.5	0.000	0.00	0.500	1.00	0.81	P21/n
TEFDIT	P21	mP=>mP	0.5	0.000	0.00	0.500	1.00	1	P21/c
TIFQEE	P21	mP=>mP	0.5	0.000	0.00	0.500	1.00	0.95	P21/c
TIRGEI	P1	aP=>aP	1.0	0.000	0.00	0.500	1.00	1	P-1
TOGYOG	P212121	oP=>oP	0.3	0.000	0.00	0.500	1.00	0.89	Pbca
TOQJAK	P1	aP=>mI	1.0	0.000	0.02	0.021	0.50	1	Ia
TUHBEE	P21	mP=>mP	0.5	0.000	0.00	0.500	1.00	1	P21/c
TUHJEN	P1	aP=>aP	1.0	0.000	0.00	0.500	1.00	1	P-1
TUMWIH	P21	mP=>mP	0.5	0.000	0.00	0.500	1.00	0.96	P21/c
TUPQUS	C2	mC=>mC	0.3	0.000	0.00	0.500	1.00	0.88	C2/c
UCIPIG	P1	aP=>aP	1.0	0.000	0.00	0.500	1.00	1	P-1
UWUGOJ	P21	mP=>mP	0.5	0.000	0.00	0.500	1.00	1	P21/n
UYUWOC	P1	aP=>mP	1.0	0.000	0.00	0.500	1.00	1	P21/n
UZAMEP	C2	mC=>mI	0.3	0.000	0.00	0.500	1.00	1	I2/c
VAJZIQ	P1	aP=>aP	1.0	0.000	0.00	0.500	1.00	0.96	P-1
VITVOM	P1	aP=>oF	1.0	0.000	0.00	0.239	0.25	0.98	Fdd2
VIWNOE	P21	mP=>mP	0.5	0.000	0.00	0.500	1.00	1	P21/n
VULTAZ	P21	mP=>oP	0.5	0.000	0.25	0.248	1.00	0.96	Pca21
WAMNAB	P1	aP=>aP	1.0	0.000	0.00	0.500	1.00	1	P-1
WASHIJ	P1	aP=>oI	1.0	0.000	0.05	0.151	0.50	0.96	Iba2
WASWAO	P21212	oP=>tP	0.3	0.075	0.00	0.247	1.00	0.99	P-421c
WEDFIW	P21	mP=>mP	0.5	0.000	0.00	0.500	1.00	1	P21/n
WENMUA	P1	aP=>aP	1.0	0.000	0.00	0.500	1.00	1	P-1
WEPWUJ	P1	aP=>aP	1.0	0.000	0.00	0.500	1.00	1	P-1
WEYTAV	P1	aP=>aP	1.0	0.000	0.00	0.500	1.00	0.98	P-1
WIKJEF	P21	mP=>mP	0.5	0.000	0.00	0.500	1.00	0.95	P21/c
WINRIX06	P21	mP=>mP	0.5	0.000	0.00	0.500	1.00	0.98	P21/c
WINSOE	P21	mP=>mP	0.5	0.000	0.00	0.500	1.00	0.91	P21/c
WOQLIA	P1	aP=>aP	1.0	0.000	0.00	0.500	1.00	1	P-1
WUNLUN	P1	aP=>aP	1.0	0.000	0.00	0.500	1.00	1	P-1
XEDTEF	P21	mP=>mP	0.5	0.000	0.00	0.500	1.00	1	P21/n
XEQBED	P1	aP=>aP	1.0	0.000	0.00	0.500	1.00	1	P-1
XICBUG	P1	aP=>mI	1.0	0.000	0.86	0.243	0.50	0.99	Ia
XISRIA	P21	mP=>mP	0.5	0.000	0.00	0.500	1.00	0.96	P21/c
XONWUS	P1	aP=>aP	1.0	0.000	0.00	0.500	1.00	1	P-1
XUBPUG	P212121	oP=>oP	0.3	0.000	0.00	0.500	1.00	0.83	Pbca
XUMQEC	P1	aP=>aP	1.0	0.000	0.00	0.500	1.00	0.96	P-1
YAHYIP	P1	aP=>mC	1.0	0.000	0.04	0.020	0.50	1	Cc
YIZGEU	P1	aP=>aP	1.0	0.000	0.00	0.500	1.00	1	P-1
YOSKAU	P21	mP=>mP	0.5	0.000	0.00	0.500	1.00	0.94	P21/c
YUFVAX	P1	aP=>aP	1.0	0.000	0.00	0.500	1.00	1	P-1
YUGTOK	P21	mP=>mP	0.5	0.000	0.00	0.500	1.00	0.92	P21/c
ZADYEL	P212121	oP=>oP	0.3	0.000	0.00	0.500	1.00	1	Pbca
ZATKOW	P21	mP=>mP	0.5	0.000	0.00	0.500	1.00	0.82	P21/n
ZEHJII	P21	mP=>mP	0.5	0.000	0.00	0.500	1.00	0.87	P21/c
ZEHKIJ	P21212	oP=>oP	0.3	0.000	0.00	0.500	1.00	0.9	Pccn
ZOCPUE	P21212	oP=>oP	0.3	0.000	0.00	0.500	1.00	0.97	Pccn
ZONDUE	P21	mP=>mP	0.5	0.000	0.00	0.500	1.00	0.98	P21/n
ZOXYIU	P21	mP=>mP	0.5	0.000	0.00	0.500	1.00	1	P21/c
ZUPQEI	P21	mP=>mP	0.5	0.000	0.00	0.500	1.00	0.82	P21/c
ZUYJOU	P21221	oP=>oP	0.3	0.000	0.00	0.500	1.00	0.91	Pbcn

## Sheet: Feuil3
Identifier	Class	Subset	Note	Kryptoracemic?	Diast?	Space Gp. Symbol	Space Gp. Number	Is Sohncke?	Has Disorder?	R-factor	Number of chiral resd	Number of chiral families	Number of chiral center	Chiral Atom Symb	Number of Carbon Chiral Atom	Number of Chiral Center having H	R	S	M	Number and type of chiral configuration	Number of chiral configuration	Number of molecule in Family	AU_chirality	point_group_of_chiral_mol	Unique Chemical Units	Z Prime	Z Value	Note1	Note2	Note3	a	b	c	Alpha	Beta	Gamma	Cell Volume	Calc. Density	formula	Compound Name	Study Temp.	pressure	melting_point	color	polymorph	phase_transitions	recrystallisation_solvent	remarks	authors_comma_delimited
NOSVOG	SCALEMIC	NC_D_I	Unbalanced Kryptoracemate -contains also an other enantiomer in enantiopure proportion + achiral molecule	KRYPTORACEMIC	NO	P21	4	TRUE	TRUE	11.27	7	2	71	['C']	71	67	37	34	0	[[(2, 'S'), (1, 'R')], [(4, 'SRSRSRRSRRRSRSSRS')]]	[2, 1]	[3, 4]	['scalemic', 'chiral']	['C1']	17	1.0	2.0	Wa-could be Diast	contains following chiral atom(s)C	NA	20.48	43.9	27.75	90.0	100.5	90.0	24531.470536	1.22625901755	4(C66 H76 Cl2 N9 O25 1+),3(C6 H14 O2),2(C6 H5 O7 3-),3(C2 H3 O2 1-),127(H2 O1),5(H3 O1 1+)	tetrakis(Balhimycin) pentaoxonium dicitrate triacetate 2-methyl-2,4-pentanediol hydrate	at 100 K	None	None	colorless	None	None	None	Hydrogen atoms have been removed due to programme problems, however are available on request. Most of the water oxygen atoms have been suppressed	M.Schafer, G.M.Sheldrick, T.R.Schneider, L.Vertesy
[truncated: 54 more columns]

## Sheet: Feuil4
Identifier	Class	Subset	Note	Kryptoracemic?	Diast?	Space Gp. Symbol	Space Gp. Number	Is Sohncke?	Has Disorder?	R-factor	Number of chiral resd	Number of chiral families	Number of chiral center	Chiral Atom Symb	Number of Carbon Chiral Atom	Number of Chiral Center having H	R	S	M	Number and type of chiral configuration	Number of chiral configuration	Number of molecule in Family	AU_chirality	point_group_of_chiral_mol	Unique Chemical Units	Z Prime	Z Value	Note1	Note2	Note3	a	b	c	Alpha	Beta	Gamma	Cell Volume	Calc. Density	formula	Compound Name	Study Temp.	pressure	melting_point	color	polymorph	phase_transitions	recrystallisation_solvent	remarks	authors_comma_delimited
ZUZROD	RACEMIC	ND_D_NI	Strict definition of kryptoracemate	KRYPTORACEMIC	NO	P21	4	TRUE	TRUE	7.58	2	1	4	['C']	4	4	2	2	0	[[(1, 'SR'), (1, 'RS')]]	[2]	[2]	['racemic']	['C1']	2	2	4	RAC-1	contains following chiral atom(s)C	NA	11.2074	25.253	14.6426	90	110.116	90	3891.35	1.46581	C50 H30 F12	meso-5,12-bis(3,5-bis(Trifluoromethyl)phenyl)-7,14-diphenyl-5,6,12,13-tetrahydrobenzo[k]tetraphene	200 K	None	None	colorless	None	None	None	None	J.Freudenberg, F.Rominger, U.H.F.Bunz
ZEHJII	RACEMIC	ND_D_NI	Strict definition of kryptoracemate	KRYPTORACEMIC	NO	P21	4	TRUE	TRUE	6.07	2	1	2	['C']	2	2	1	1	0	[[(1, 'S'), (1, 'R')]]	[2]	[2]	['racemic']	['C1']	2	2	4	RAC-1	contains following chiral atom(s)C	NA	8.4726	6.9547	24.9403	90	98.329	90	1454.09	1.39237	C19 H18 N2 O2	2-(1-azabicyclo[2.2.2]octan-3-yl)-1H-benzo[de]isoquinoline-1,3(2H)-dione	293 K	None	None	grey	None	None	None	None	T.Rekis, S.dAgostino, D.Braga, F.Grepioni
YIYPIH	RACEMIC	ND_D_NI	Strict definition of kryptoracemate	KRYPTORACEMIC	NO	P21	4	TRUE	TRUE	6.59	6	1	24	['C']	24	18	12	12	0	[[(3, 'SSSR'), (3, 'RRRS')]]	[2]	[6]	['racemic']	['C1']	6	6	12	RAC-2	contains following chiral atom(s)C	NA	6.8966	46.307	12.7309	90	98.017	90	4026.02	1.0906	C15 H24 O1	1,1,4,7-Tetramethyl-1a,2,3,4,4a,5,6,7b-octahydro-1H-cyclopropa[e]azulen-4-ol	at 100 K	None	None	yellow	None	None	None	None	J.Carreras, M.Livendahl, P.R.McGonigal, A.M.Echavarren
YEMBAW	RACEMIC	ND_D_NI	Contains also at least an other enantiomer in enantiopure proportion + achiral molecule	KRYPTORACEMIC	NO	P21	4	TRUE	TRUE	7.48	8	2	24	['C']	24	22	12	12	0	[[(2, 'S'), (4, 'R')], [(2, 'SSSSRRRSR')]]	[2, 1]	[6, 2]	['racemic', 'chiral']	['C1']	9	2	4	Wa-could be Diast	contains following chiral atom(s)C	NA	13.9938	23.6428	17.6301	90	89.695	90	5832.88	1.2251	C43 H58 N4 O12,3(C4 H10 O1),0.5(H2 O1)	rifampicin 2-butanol solvate hemihydrate	120 K	None	None	red	None	None	None	None	B.Wicher, Krystian Pyta, P.Przybylski, M.Gdaniec
YELYAS	RACEMIC	ND_D_NI	Contains also at least an other enantiomer in enantiopure proportion + achiral molecule	KRYPTORACEMIC	NO	P21	4	TRUE	TRUE	7.91	6	2	22	['C']	22	20	10	12	0	[[(2, 'S'), (2, 'R')], [(2, 'SSSSRRRSR')]]	[2, 1]	[4, 2]	['racemic', 'chiral']	['C1']	8	2	4	Wa-could be Diast	contains following chiral atom(s)C	NA	13.9424	17.4799	24.522	90	105.709	90	5753.08	1.21265	C43 H58 N4 O12,1.88(C5 H12 O1),0.62(C1 H2 Cl2),0.5(H2 O1)	rifampicin 2-pentanol dichloromethane solvate hemihydrate	130 K	None	None	red	None	None	None	None	B.Wicher, Krystian Pyta, P.Przybylski, M.Gdaniec
XISXAB	RACEMIC	ND_D_NI	Strict definition of kryptoracemate	KRYPTORACEMIC	NO	P21	4	TRUE	TRUE	9.12	2	1	2	['C']	2	2	1	1	0	[[(1, 'S'), (1, 'R')]]	[2]	[2]	['racemic']	['C1']	2	2	4	RAC-1	contains following chiral atom(s)C	NA	10.1325	10.3058	14.6238	90	94.764	90	1521.79	1.39356	C16 H12 F3 N3 O1	3-amino-1-([1,1'-biphenyl]-4-yl)-2-diazo-4,4,4-trifluorobutan-1-one	293 K	None	None	light colorless	None	None	None	None	Huamin Wang, Li Zhang, Youshao Tu, Ruiqi Xiang, Yin-Long Guo, Junliang Zhang
XIGGEB	RACEMIC	ND_D_NI	Strict definition of kryptoracemate	KRYPTORACEMIC	NO	P21	4	TRUE	TRUE	5.66	2	1	2	['C']	2	2	1	1	0	[[(1, 'S'), (1, 'R')]]	[2]	[2]	['racemic']	['C1']	2	2	4	RAC-1	contains following chiral atom(s)C	NA	7.67232	11.2894	22.5206	90	97.592	90	1933.54	1.43412	C24 H19 N1 O4 S1	12-Methyl-6-((phenylsulfonyl)methyl)-6,12-dihydro-11H-isochromeno[4,3-c]quinolin-11-one	120 K	None	None	colorless	None	None	None	None	J.D.Dooley, S.R.Chidipudi, Hon Wai Lam
XADZOS	RACEMIC	ND_D_NI	Strict definition of kryptoracemate	KRYPTORACEMIC	NO	P21	4	TRUE	TRUE	3.46	2	1	6	['C']	6	6	3	3	0	[[(1, 'RRS'), (1, 'SSR')]]	[2]	[2]	['racemic']	['C1']	2	2	4	RAC-1	contains following chiral atom(s)C	NA	11.5918	19.308	13.107	90	112.432	90	2711.56	1.37992	C25 H35 N1 O6 S1 Si1	(+-)-(2S*,3R*,4S*)-4-(t-Butyldimethylsiloxy)-3-hydroxy-1-((4-methylphenyl)sulfonyl)pyrroldine-2-carboxylic acid benzyl ester	at 223 K	None	103-104 deg.C	colorless	None	None	hexanes/ethyl acetate	None	S.R.Angle, D.S.Belanger
WOQQIE	RACEMIC	ND_D_NI	Strict definition of kryptoracemate	KRYPTORACEMIC	NO	P21	4	TRUE	TRUE	5.27	2	1	2	['B']	0	0	1	1	0	[[(1, 'S'), (1, 'R')]]	[2]	[2]	['racemic']	['C1']	2	2	4	RAC-1	contains following chiral atom(s)B	NA	10.765	14.567	14.658	90	97.11	90	2280.9	1.22318	C22 H35 B3 N4 S1	1,1-Dihydrido-1,2-bis(1,3-dimethylimidazolium-2-yl)-2-(9-borabiyclo(3.3.1)nonan-9-yl)-2-(2-thienyl)diborate	at 100 K	None	None	colorless	None	None	None	None	H.Braunschweig, C.Horl
WONRAS	RACEMIC	ND_D_NI	Strict definition of kryptoracemate	KRYPTORACEMIC	NO	P21	4	TRUE	TRUE	5.82	2	1	2	['C']	2	2	1	1	0	[[(1, 'S'), (1, 'R')]]	[2]	[2]	['racemic']	['C1']	2	2	4	RAC-1	contains following chiral atom(s)C	NA	9.56	18.546	9.671	90	119	90	1499.68	1.1932	C17 H19 N1 S1	N-Phenyl-2-benzylthiobutanamide	at 213 K	None	None	colorless	None	None	None	None	R.W.Hoffmann, B.Holzer, O.Knopff, K.Harms
WAPKUW	RACEMIC	ND_D_NI	Strict definition of kryptoracemate	KRYPTORACEMIC	NO	P21	4	TRUE	TRUE	6.77	2	1	4	['C']	4	0	2	2	0	[[(1, 'SS'), (1, 'RR')]]	[2]	[2]	['racemic']	['C1']	2	2	4	RAC-1	contains following chiral atom(s)C	NA	7.4405	24.088	14.518	90	97.659	90	2578.8	1.30989	C31 H28 N2 O5	8-methoxy-1'',3,3'',3''-tetramethyl-1'',3''-dihydrodispiro[1,3-benzoxazine-2,2'-benzo[1,2-b:3,4-b']dipyran-8',2''-indol]-4(3H)-one	150 K	None	None	red	None	None	None	None	I.V.Ozhogin, V.V.Tkachev, B.S.Luk'yanov, E.P.Mukhanov, A.V.Chernyshev, O.A.Komissarova, V.I.Minkin, S.M.Aldoshin
WACRIC	RACEMIC	ND_D_NI	Strict definition of kryptoracemate	KRYPTORACEMIC	NO	P21	4	TRUE	TRUE	7.87	2	1	4	['P']	0	0	2	2	0	[[(1, 'SS'), (1, 'RR')]]	[2]	[2]	['racemic']	['C1']	2	2	4	RAC-1	contains following chiral atom(s)P	NA	6.7465	24.683	9.5808	90	101.342	90	1564.27	1.98322	C13 H12 P2 Se3	2,4-diphenyl-1,2,4-selenadiphosphetane 2,4-diselenide	at 293 K	None	None	yellow	None	None	None	None	P.Kilian, P.Bhattacharyya, A.M.Z.Slawin, J.D.Woollins
VULTAZ	RACEMIC	ND_D_NI	Strict definition of kryptoracemate	KRYPTORACEMIC	NO	P21	4	TRUE	TRUE	4.44	2	1	2	['C']	2	0	1	1	0	[[(1, 'S'), (1, 'R')]]	[2]	[2]	['racemic']	['C1']	2	2	4	RAC-1	contains following chiral atom(s)C	NA	9.5125	13.887	14.68	90	90.249	90	1939.21	1.36131	C18 H23 N1 O7 S1	ethyl 1-(2-(4-(methylsulfonyl)-2-nitrophenyl)ethyl)-2-oxocyclohexanecarboxylate	293 K	None	None	colorless	None	None	None	None	Shizhou Liu, Mengchao Tong, Yang Yu, Hexin Xie, Hao Li, Wei Wang
VILCOK	RACEMIC	ND_D_NI	Strict definition of kryptoracemate	KRYPTORACEMIC	NO	P21	4	TRUE	TRUE	8.39	2	1	6	['C']	6	0	3	3	0	[[(1, 'RRS'), (1, 'SSR')]]	[2]	[2]	['racemic']	['C1']	2	2	4	RAC-1	contains following chiral atom(s)C	NA	8.0211	8.811	23.772	90	97.876	90	1664.21	1.33468	C22 H22 O3	4',5'-Dihydro-3'H-spiro[9,21-dioxapentacyclo[8.7.4.01,10.02,7.011,16]henicosa-2,4,6,11,13,15-hexaene-17,2'-furan]	158 K	None	None	colorless	None	None	None	None	M.G.Timerbulatova, M.R.D.Gatus, K.Q.Vuong, M.Bhadbhade, A.G.Algarra, S.A.Macgregor, B.A.Messerle
VIGHOL	RACEMIC	ND_D_NI	Strict definition of kryptoracemate	KRYPTORACEMIC	NO	P21	4	TRUE	TRUE	3.5	2	1	4	['C']	4	4	2	2	0	[[(1, 'SS'), (1, 'RR')]]	[2]	[2]	['racemic']	['C1']	2	2	4	RAC-1	contains following chiral atom(s)C	NA	12.4983	11.81	14.9569	90	101.875	90	2160.46	1.19751	C24 H23 N1 O2 S1	N-(3,5-diphenylpent-4-yn-2-yl)-4-methylbenzene-1-sulfonamide	123 K	None	None	colorless	None	None	None	None	T.N.Nguyen, J.A.May
UTOWOQ	RACEMIC	ND_D_NI	Strict definition of kryptoracemate + achiral molecule	KRYPTORACEMIC	NO	P21	4	TRUE	TRUE	6.31	2	1	2	['B']	0	0	1	1	0	[[(1, 'S'), (1, 'R')]]	[2]	[2]	['racemic']	['C1']	4	2	4	RAC-1	contains following chiral atom(s)B	NA	12.251	18.924	13.226	90	115.098	90	2776.78	1.29162	C35 H30 B1 N3 O1,0.5(C2 H3 N1)	Ethoxo-(5,10,15-triphenylsubbacteriochlorinato-N,N',N'')-boron(iii) acetonitrile solvate	at 123 K	None	None	orange	None	None	acetonitrile/heptane	None	S.Hayashi, E.Tsurumaki, Y.Inokuma, Pyosang Kim, Young Mo Sung, DonghoKim, A.Osuka
TUTYEN	RACEMIC	ND_D_NI	Strict definition of kryptoracemate	KRYPTORACEMIC	NO	P21	4	TRUE	TRUE	7.76	2	1	8	['C']	8	8	4	4	0	[[(1, 'RSRS'), (1, 'SRSR')]]	[2]	[2]	['racemic']	['C1']	2	2	4	RAC-1	contains following chiral atom(s)C	NA	6.1403	22.8133	15.7488	90	92.913	90	2203.25	1.48753	C28 H16 F5 N1 O2	N-(2,3,4,5,6-Pentafluorophenyl)-7-(diphenylmethylidene)bicyclo[2.2.1]hept-2-ene-5,6-dicarboximide	at 93 K	None	None	colorless	None	None	None	None	A.Schwarzer, P.Bombicz, E.Weber
TOFTAM	RACEMIC	ND_D_NI	Strict definition of kryptoracemate	KRYPTORACEMIC	NO	P21	4	TRUE	TRUE	3.48	2	1	2	['C']	2	2	1	1	0	[[(1, 'S'), (1, 'R')]]	[2]	[2]	['racemic']	['C1']	2	2	4	RAC-1	contains following chiral atom(s)C	NA	5.8479	14.8989	17.0994	90	95.941	90	1481.82	1.36869	C20 H16 F1 N1 O1	5-[(4-fluorophenyl)methyl]-3-(naphthalen-2-yl)-4,5-dihydro-1,2-oxazole	100.0 K	None	None	colorless	None	None	None	None	A.A.Jimoh, S.Hosseyni, Xiaohan Ye, L.Wojtas, Yong Hu, Xiaodong Shi
TETBUS01	RACEMIC	ND_D_NI	Strict definition of kryptoracemate	KRYPTORACEMIC	NO	P21	4	TRUE	TRUE	11.54	6	1	6	['C']	6	6	3	3	0	[[(3, 'S'), (3, 'R')]]	[2]	[6]	['racemic']	['C1']	6	6	12	RAC-2	contains following chiral atom(s)C	NA	21.38	4.744	25.53	90	102.25	90	2530.47	1.14339	C7 H15 N1 O2	2-azaniumylheptanoate	70 K	None	None	colorless	polymorph I	None	None	None	M.M.H.Smets, M.B.Pitak, J.Cadden, V.R.Kip, G.A.de Wijs, E.R.H.van Eck, P.Tinnemans, Hugo Meekes, Elias Vlieg, S.J.Coles, H.M.Cuppen
SEQREO	RACEMIC	ND_D_NI	Strict definition of kryptoracemate	KRYPTORACEMIC	NO	P21	4	TRUE	TRUE	12.52	2	1	2	['C']	2	2	1	1	0	[[(1, 'S'), (1, 'R')]]	[2]	[2]	['racemic']	['C1']	2	2	4	RAC-1	contains following chiral atom(s)C	NA	12.4507	4.5082	24.1767	90	104.131	90	1315.98	1.34404	C14 H18 O5	methyl 2-butoxy-5-hydroxy-2,3-dihydro-1-benzofuran-4-carboxylate	100 K	None	None	colorless	None	None	None	None	B.W.Skelton, M.J.Piggott, M.R.Buccini
SAXMIQ	RACEMIC	ND_D_NI	Strict definition of kryptoracemate + achiral molecule	KRYPTORACEMIC	NO	P21	4	TRUE	TRUE	5.11	2	1	2	['C']	2	0	1	1	0	[[(1, 'S'), (1, 'R')]]	[2]	[2]	['racemic']	['C1']	3	2	4	RAC-1	contains following chiral atom(s)C	NA	11.664	16.775	13.975	90	105.749	90	2631.75	1.29649	C24 H23 N5 O2 S1,0.5(C6 H14)	6-amino-4-{3-cyano-5-[5-(methoxymethyl)thiophen-2-yl]phenyl}-3-methyl-4-(propan-2-yl)-2,4-dihydropyrano[2,3-c]pyrazole-5-carbonitrile hexane solvate	100 K	None	438 K	colorless	None	None	dichloromethane/hexane	None	G.Schwertz, M.C.Witschel, M.Rottmann, R.Bonnert, U.Leartsakulpanich, P.Chitnumsub, A.Jaruwat, W.Ittarat, A.Schafer, R.A.Aponte, S.A.Charman, K.L.White, A.Kundu, S.Sadhukhan, M.Lloyd, G.M.Freiberg, M.Srikumaran, M.Siggel, A.Zwyssig, P.Chaiyen, F.Diederich
SAGKAP	RACEMIC	ND_D_NI	Strict definition of kryptoracemate	KRYPTORACEMIC	NO	P21	4	TRUE	TRUE	4.56	4	1	16	['C']	16	12	8	8	0	[[(2, 'RRSR'), (2, 'SSRS')]]	[2]	[4]	['racemic']	['C1']	4	4	8	RAC-2	contains following chiral atom(s)C	NA	12.7662	27.1211	14.1815	90	105.473	90	4732.15	1.31512	C25 H25 F1 N2 O6,0.01(C2 H6 O1)	Diethyl 2'-(4-fluorophenyl)-1-methyl-2,6'-dioxo-1,2-dihydrospiro[indole-3,3'-piperidine]-4',5'-dicarboxylate ethanol solvate	173 K	None	None	colorless	None	None	None	The solvent molecule does not appear to have been modelled.	Xin Huang, K.Pham, Wenbin Yi, Xiaofeng Zhang, C.Clamens, J.H.Hyatt, J.P.Jasinsk, U.Tayvah, Wei Zhang
RISNIS	RACEMIC	ND_D_NI	Strict definition of kryptoracemate	KRYPTORACEMIC	NO	P21	4	TRUE	TRUE	5.59	2	1	4	['C']	4	0	2	2	0	[[(1, 'SS'), (1, 'RR')]]	[2]	[2]	['racemic']	['C1']	2	2	4	RAC-1	contains following chiral atom(s)C	NA	11.6386	19.1068	11.7615	90	94.728	90	2606.58	1.55502	C31 H30 N2 O4	2,4,7,9-Tetramethoxy-4b-(4-methylphenyl)-9b-phenyl-4b,5,9b,10-tetrahydroindolo[3,2-b]indole	at 100 K	None	None	colorless	None	None	None	None	J.Kovach, W.W.Brennessel, W.D.Jones
QILZUJ	RACEMIC	ND_D_NI	Contains also at least an other enantiomer in enantiopure proportion + achiral molecule	KRYPTORACEMIC	NO	P21	4	TRUE	TRUE	5.14	4	2	4	['C']	4	4	3	1	0	[[(2, 'R')], [(1, 'S'), (1, 'R')]]	[1, 2]	[2, 2]	['chiral', 'racemic']	['C1']	5	2	4	RAC-1	contains following chiral atom(s)C	NA	12.9532	5.76337	25.2764	90	93.984	90	1882.43	1.27524	C14 H14 O3,C5 H9 N1 O2,0.5(C1 H4 O1)	(2R)-2-(6-methoxynaphthalen-2-yl)propanoic acid (2S)-2-(6-methoxynaphthalen-2-yl)propanoic acid bis((2R)-pyrrolidine-2-carboxylic acid) methanol solvate	295 K	None	None	colorless	None	None	None	None	N.Tumanova, N.Tumanov, F.Fischer, F.Morelle, V.Ban, K.Robeyns, Y.Filinchuk, J.Wouters, Franziska Emmerling, T.Leyssens
QALCIQ	RACEMIC	ND_D_NI	Strict definition of kryptoracemate + achiral molecule	KRYPTORACEMIC	NO	P21	4	TRUE	TRUE	5.33	2	1	2	['C']	2	0	1	1	0	[[(1, 'S'), (1, 'R')]]	[2]	[2]	['racemic']	['C1']	11	2	4	RAC-1	contains following chiral atom(s)C	NA	11.5122	32.0092	11.9449	90	95.101	90	4384.22	1.28492	C29 H30 N6 O4,4(C2 H6 O1 S1),0.5(H2 O1)	(4-Cyano-2-(3,4-dimethylphenyl)-6-methyl-3,8-dioxo-2,3,5,6,7,8-hexahydropyrido(3,4-c)pyridazin-6-yl)((3,4-dimethylphenyl)hydrazono)acetic acid ethyl ester dimethylsulfoxide solvate hemihydrate	at 173 K	None	None	yellow	None	None	None	None	K.Laihia, E.Kolehmainen, E.Wegelius, S.Miltsov, V.Nikiforov, V.Karavan
PUQSEA	RACEMIC	ND_D_NI	Strict definition of kryptoracemate	KRYPTORACEMIC	NO	P21	4	TRUE	TRUE	5.7	6	1	12	['C']	12	6	6	6	0	[[(1, 'SR'), (5, 'RS')]]	[2]	[6]	['racemic']	['C1']	6	6	12	RAC-2	contains following chiral atom(s)C	NA	13.313	12.484	18.686	90	97.932	90	3075.89	1.33215	C11 H16 N2	pentakis((1R,7S)-1,10,10-trimethyl-3,4-diazatricyclo[5.2.1.02,6]deca-2,5-diene) (1S,7R)-1,10,10-trimethyl-3,4-diazatricyclo[5.2.1.02,6]deca-2,5-diene	at 120 K	None	None	colorless	None	None	None	None	G.P.A.Yap, R.M.Claramunt, C.Lopez, M.A.Garcia, C.Perez-Medina, I.Alkorta, J.Elguero
PONVOE	RACEMIC	ND_D_NI	Strict definition of kryptoracemate	KRYPTORACEMIC	NO	P21	4	TRUE	TRUE	4.54	2	1	4	['C']	4	4	2	2	0	[[(1, 'SS'), (1, 'RR')]]	[2]	[2]	['racemic']	['C1']	2	2	4	RAC-1	contains following chiral atom(s)C	NA	10.3873	25.773	10.4127	90	97.269	90	2765.2	1.16426	C28 H40 N2 O3 S1	(E)-N-(2-(3,5-Di-t-butyl-2-hydroxybenzylideneamino)cyclohexyl)-4-methylbenzenesulfonamide	at 298 K	None	None	yellow	None	None	acetonitrile	None	Jincai Wu, Lei Wang, Xiaobo Pan, Lihui Yao
PEYSIV	RACEMIC	ND_D_NI	Strict definition of kryptoracemate	KRYPTORACEMIC	NO	P21	4	TRUE	TRUE	4.6	2	1	2	['C']	2	2	1	1	0	[[(1, 'S'), (1, 'R')]]	[2]	[2]	['racemic']	['C1']	2	2	4	RAC-1	contains following chiral atom(s)C	NA	12.162	9.938	12.232	90	103.16	90	1439.61	1.93783	C12 H23 N3 O2	N-Pivaloylproline-N'-methyl-N'-(methylamino)amide	None	None	None	None	None	None	None	None	V.Dupont, A.Lecoq, J.-P.Mangeot, A.Aubry, G.Boussard, M.Marraud
PELDOC	RACEMIC	ND_D_NI	Strict definition of kryptoracemate	KRYPTORACEMIC	NO	P21	4	TRUE	TRUE	4.24	2	1	2	['C']	2	2	1	1	0	[[(1, 'S'), (1, 'R')]]	[2]	[2]	['racemic']	['C1']	2	2	4	RAC-1	contains following chiral atom(s)C	NA	7.1363	8.6355	13.7048	90	98.709	90	834.828	1.79894	C3 H6 N4 O8	3-(nitroamino)propane-1,2-diyl dinitrate	200 K	None	None	colorless	None	None	None	None	T.Altenburg, T.M.Klapotke, A.Penger
PEGKUJ	RACEMIC	ND_D_NI	Strict definition of kryptoracemate	KRYPTORACEMIC	NO	P21	4	TRUE	TRUE	3.32	2	1	2	['C']	2	2	1	1	0	[[(1, 'S'), (1, 'R')]]	[2]	[2]	['racemic']	['C1']	2	2	4	RAC-1	contains following chiral atom(s)C	NA	6.6812	9.6029	18.372	90	96.333	90	1171.53	1.22622	C13 H16 N2 O1	3-Ethyl-5-methyl-2-(pyridin-2-ylamino)cyclopent-2-en-1-one	at 100 K	None	None	colorless	None	None	None	None	Zhiqian Wang, B.J.Reinus, Guangbin Dong
OYOGOA	RACEMIC	ND_D_NI	Strict definition of kryptoracemate + achiral molecule	KRYPTORACEMIC	NO	P21	4	TRUE	TRUE	4.89	2	1	2	['C']	2	0	1	1	0	[[(1, 'S'), (1, 'R')]]	[2]	[2]	['racemic']	['C1']	4	2	4	RAC-1	contains following chiral atom(s)C	NA	9.6928	9.7129	19.783	90	100.372	90	1832.04	1.33869	C17 H16 O4,C1 H2 Cl2	1,8-dihydroxy-8-methyl-8,9-dihydrodibenzo[b,d]oxonin-6(7H)-one dichloromethane solvate	90 K	None	None	colorless	None	None	None	None	D.Yuyama, N.Sugiyama, T.Maeda, Y.Dobashi, S.Yokojima, Y.Fujimoto, H.Yanai, T.Matsumoto
OSEGAW	RACEMIC	ND_D_NI	Strict definition of kryptoracemate	KRYPTORACEMIC	NO	P21	4	TRUE	TRUE	9.38	2	1	2	['C']	2	2	1	1	0	[[(1, 'S'), (1, 'R')]]	[2]	[2]	['racemic']	['C1']	2	2	4	RAC-1	contains following chiral atom(s)C	NA	10.601	19.272	11.193	90	117.501	90	2028.36	1.351	C26 H20 O1 S2	11-methoxy-9-phenyl-2,3-dihydro-9H-benzo[1,2]fluoreno[3,4-b][1,4]dithiine	293 K	None	None	colorless	None	None	None	None	Wei Xu, Ming Chen, Ning Sun, Yuanhong Liu
ONUBAC	RACEMIC	ND_D_NI	Strict definition of kryptoracemate + achiral molecule	KRYPTORACEMIC	NO	P21	4	TRUE	TRUE	5.03	4	1	4	['P']	0	0	2	2	0	[[(2, 'S'), (2, 'R')]]	[2]	[4]	['racemic']	['C1']	6	4	8	RAC-2	contains following chiral atom(s)P	NA	15.3957	31.578	17.2918	90	111.265	90	7834.29	1.15267	C42 H41 O5 P1,x(C2 H6 O1),x(H2 O1)	8-(2-methoxy-1-naphthyl)-4-(2,4,6-triisopropylphenyl)benzo[d]naphtho[2,3-f][1,3,2]dioxaphosphepin-6-ol 6-oxide ethanol solvate hydrate	100 K	None	None	colorless	None	None	None	None	N.Momiyama, K.Funayama, H.Noda, M.Yamanaka, N.Akasaka, S.Ishida, T.Iwamoto, M.Terada
NOKRIP	RACEMIC	ND_D_NI	Strict definition of kryptoracemate + achiral molecule	KRYPTORACEMIC	NO	P21	4	TRUE	TRUE	2.86	2	1	2	['B']	0	0	1	1	0	[[(1, 'S'), (1, 'R')]]	[2]	[2]	['racemic']	['C1']	3	2	4	RAC-1	contains following chiral atom(s)B	NA	10.8172	16.397	15.1128	90	93.004	90	2676.87	1.19943	C32 H26 B1 N1 O2,0.5(C1 H4 O1)	8-(4-methylphenyl)-11,11-diphenyl-10,11-dihydro-8H-naphtho(1,2-e)(1,3,2)oxazaborolo(2,3-b)(1,3,2)oxazaborinine methanol solvate	at 291 K	None	192 deg.C	yellow	None	None	None	None	M.Braun, S.Schlecht, M.Engelmann, W.Frank, S.Grimme
NIKTAD	RACEMIC	ND_D_NI	Strict definition of kryptoracemate	KRYPTORACEMIC	NO	P21	4	TRUE	TRUE	6.04	2	1	4	['C']	4	2	2	2	0	[[(1, 'SS'), (1, 'RR')]]	[2]	[2]	['racemic']	['C1']	2	2	4	RAC-1	contains following chiral atom(s)C	NA	9.4241	10.073	19.849	90	102.52	90	1839.44	1.29211	C20 H20 Cl1 N1 O3	Ethyl 1-benzoyl-4-chloro-2-phenylprolinate	at 293 K	None	471 K	colorless	None	None	ethanol	None	R.Tamazyan, A.Ayvazyan, A.Martirosyan, V.Martirosyan, R.Schinazi
NEDYEC	RACEMIC	ND_D_NI	Strict definition of kryptoracemate	KRYPTORACEMIC	NO	P21	4	TRUE	TRUE	6.94	2	1	8	['C']	8	6	4	4	0	[[(1, 'SRSS'), (1, 'RSRR')]]	[2]	[2]	['racemic']	['C1']	2	2	4	RAC-1	contains following chiral atom(s)C	NA	10.435	8.3916	24.2782	90	91.363	90	2125.35	1.24537	C27 H26 O3	(2S,4R,5S)-4-((S)-[1,1'-biphenyl]-4-yl(hydroxy)methyl)-5-ethyl-2-methyl-2-phenylcyclopentane-1,3-dione	at 93 K	None	None	colorless	None	None	None	None	K.Aikawa, T.Okamoto, K.Mikami
MUMXAV	RACEMIC	ND_D_NI	Strict definition of kryptoracemate	KRYPTORACEMIC	NO	P21	4	TRUE	TRUE	4.26	2	1	4	['C']	4	4	2	2	0	[[(1, 'SR'), (1, 'RS')]]	[2]	[2]	['racemic']	['C1']	2	2	4	RAC-1	contains following chiral atom(s)C	NA	9.455	25.198	11.125	90	109.339	90	2500.95	1.37208	C26 H28 O7 S2	Ethyl (3S*,5R*)-5,10-bis(phenylsulfonyl)-3,4,5,6,7,8-hexahydro-1H-cycloocta[c]pyran-3-carboxylate	173.2 K	None	429.5-430.5 K	colorless	None	None	ethyl acetate/hexane	None	C.Mukai, M.Ueda, Y.Takahashi, F.Inagaki
MEBCUT	RACEMIC	ND_D_NI	Strict definition of kryptoracemate	KRYPTORACEMIC	NO	P21	4	TRUE	TRUE	4.52	2	1	8	['C']	8	8	4	4	0	[[(1, 'RRSR'), (1, 'SSRS')]]	[2]	[2]	['racemic']	['C1']	2	2	4	RAC-1	contains following chiral atom(s)C	NA	16.31	5.6178	17.614	90	114.56	90	1467.89	1.3909	C15 H21 N1 O4	2-(5-Methyltetrahydrofuran-2-yl)-4-nitro-3-phenylbutan-1-ol	at 173 K	None	None	colorless	None	None	None	None	P.G.McGarraugh, R.C.Johnston, A.Martinez-Munoz, P.H.-Y.Cheong, S.E.Brenner-Moyer
MALGIS	RACEMIC	ND_D_NI	Strict definition of kryptoracemate	KRYPTORACEMIC	NO	P21	4	TRUE	TRUE	9.13	4	1	4	['P']	0	0	2	2	0	[[(2, 'S'), (2, 'R')]]	[2]	[4]	['racemic']	['C1']	4	4	8	RAC-2	contains following chiral atom(s)P	NA	11.9879	19.1972	17.072	90	90.542	90	3928.67	1.11403	C17 H36 N3 O1 P1	N'-t-butyl-N,N''-dicyclohexyl-N-methylphosphoric triamide	175 K	None	None	None	None	None	None	None	M.Keikha, M.Pourayoubi, A.Tarahhomi, A.Van der Lee
LEVPEH	RACEMIC	ND_D_NI	Contains also at least an other enantiomer in enantiopure proportion	KRYPTORACEMIC	NO	P21	4	TRUE	TRUE	5.5	4	2	8	['C']	8	8	3	5	0	[[(2, 'SSR')], [(1, 'S'), (1, 'R')]]	[1, 2]	[2, 2]	['chiral', 'racemic']	['C1']	4	2	4	RAC-1	contains following chiral atom(s)C	NA	13.0454	28.1359	8.7936	90	94.114	90	3219.32	1.28283	C33 H27 N1 O3,C7 H12 O1	2(S)-(9,10-Dihydro-9,10-ethanoanthracene-11,12-dicarboximido)-1,1-diphenylpropan-1-ol 3-methylcyclohexanone clathrate	None	None	None	None	None	None	None	None	E.Weber, C.Reutel, C.Foces-Foces, A.L.Llamas-Saiz
KAZTIR	RACEMIC	ND_D_NI	Strict definition of kryptoracemate	KRYPTORACEMIC	NO	P21	4	TRUE	TRUE	6.79	4	1	8	['C']	8	8	6	2	0	[[(1, 'SS'), (3, 'RR')]]	[2]	[4]	['racemic']	['C1']	4	4	8	RAC-2	contains following chiral atom(s)C	NA	18.7446	11.0884	14.2531	90	90.3646	90	2962.41	1.33336	C16 H21 F2 N1 O2	3-fluoro-2-[fluoro(phenyl)methyl]-3-methyl-1-(morpholin-4-yl)butan-1-one	100 K	None	None	colorless	None	None	None	None	S.M.Banik, K.M.Mennie, E.N.Jacobsen
JIZJOR03	RACEMIC	ND_D_NI	Strict definition of kryptoracemate	KRYPTORACEMIC	NO	P21	4	TRUE	TRUE	10.52	4	1	4	['C']	4	0	2	2	0	[[(2, 'S'), (2, 'R')]]	[2]	[4]	['racemic']	['C1']	4	4	8	RAC-2	contains following chiral atom(s)C	NA	11.6895	11.6246	26.7418	90	102.242	90	3551.2	1.2285	C22 H20 N2 O1	1,3,3-trimethyl-1,3-dihydrospiro[indole-2,3'-naphtho[2,1-b][1,4]oxazine]	297 K	None	None	None	monoclinic P21 polymorph	None	None	None	P.R.Sahoo, S.Kumar
IGAKEI	RACEMIC	ND_D_NI	Strict definition of kryptoracemate + achiral molecule	KRYPTORACEMIC	NO	P21	4	TRUE	TRUE	5.07	8	1	16	['C']	16	16	8	8	0	[[(4, 'SS'), (4, 'RR')]]	[2]	[8]	['racemic']	['C1']	16	8	16	RAC-2	contains following chiral atom(s)C	NA	13.4929	24.7866	21.62	90	105.39	90	6971.38	1.20588	C19 H23 F1 N2,H2 O1	(2R,5R)-2-benzyl-1-(4-fluorobenzyl)-5-methylpiperazine monohydrate	at 90 K	None	None	colorless	None	None	None	None	Huimin Zhai, A.Borzenko, Ying Yin Lau, Shin Hye Ahn, L.L.Schafer
IFEJOV	RACEMIC	ND_D_NI	Strict definition of kryptoracemate	KRYPTORACEMIC	NO	P21	4	TRUE	TRUE	4.93	2	1	2	['C']	2	2	1	1	0	[[(1, 'S'), (1, 'R')]]	[2]	[2]	['racemic']	['C1']	2	2	4	RAC-1	contains following chiral atom(s)C	NA	5.35503	10.169	32.73	90	92.72	90	1780.31	1.28862	C18 H23 N3 O4	ethyl 4-{4-[cyclohexyl(hydroperoxy)methyl]-1H-1,2,3-triazol-1-yl}benzoate	173 K	None	None	colorless	None	None	None	None	F.Sebest, L.Casarrubios, H.S.Rzepa, A.J.P.White, S.Diez-Gonzalez
IFEJEL	RACEMIC	ND_D_NI	Strict definition of kryptoracemate	KRYPTORACEMIC	NO	P21	4	TRUE	TRUE	4.21	2	1	4	['C']	4	4	2	2	0	[[(1, 'SS'), (1, 'RR')]]	[2]	[2]	['racemic']	['C1']	2	2	4	RAC-1	contains following chiral atom(s)C	NA	5.66625	18.3197	17.6253	90	90.314	90	1829.55	1.24677	C23 H21 N1 O2	ethyl 4-(2,3-diphenylaziridin-1-yl)benzoate	173 K	None	None	colorless	None	None	None	None	F.Sebest, L.Casarrubios, H.S.Rzepa, A.J.P.White, S.Diez-Gonzalez
HIKGEN	RACEMIC	ND_D_NI	Strict definition of kryptoracemate	KRYPTORACEMIC	NO	P21	4	TRUE	TRUE	3.37	2	1	4	['C']	4	2	2	2	0	[[(1, 'SR'), (1, 'RS')]]	[2]	[2]	['racemic']	['C1']	2	2	4	RAC-1	contains following chiral atom(s)C	NA	9.153	11.495	10.277	90	93.161	90	1079.64	1.3597	C12 H15 N1 O3	Spiro(1-azabicyclo(5.3.0)decane-6,2'(5'H)-furan)-2'10-dione	at 183 K	None	None	colorless	None	None	None	None	S.F.Martin, S.K.Bur
HIFMUG	RACEMIC	ND_D_NI	Strict definition of kryptoracemate	KRYPTORACEMIC	NO	P21	4	TRUE	TRUE	17.22	2	1	2	['C']	2	2	1	1	0	[[(1, 'S'), (1, 'R')]]	[2]	[2]	['racemic']	['C1']	2	2	4	RAC-1	contains following chiral atom(s)C	NA	8.0528	11.9625	24.136	90	93.301	90	2321.2	1.34367	C26 H28 F1 N1 O4 S1	Ethyl 3-(fluoro(2-((4-methylphenyl)sulfonyl)-2,3,4a,5,6,7-hexahydroisoquinolin-4(1H)-ylidene)methyl)benzoate	at 200 K	None	None	colorless	None	None	None	None	M.-C.P.Yeh, Chia-Jung Liang, Tzu-Lin Huang, Hsiao-Ju Hsu, Yu-Shuo Tsau
HAJGEH	RACEMIC	ND_D_NI	Strict definition of kryptoracemate	KRYPTORACEMIC	NO	P21	4	TRUE	TRUE	2.96	2	1	4	['C']	4	4	2	2	0	[[(1, 'SS'), (1, 'RR')]]	[2]	[2]	['racemic']	['C1']	2	2	4	RAC-1	contains following chiral atom(s)C	NA	8.6249	14.82	10.971	90	95.98	90	1394.69	1.39721	C15 H19 N1 O3 S1	2-((4-methylphenyl)sulfonyl)octahydro-5H-isoindol-5-one	173.2 K	None	None	colorless	None	None	None	None	Gang-Wei Wang, N.G.McCreanor, M.H.Shaw, W.G.Whittingham, J.F.Bower
GENLET01	RACEMIC	ND_D_NI	Strict definition of kryptoracemate	KRYPTORACEMIC	NO	P21	4	TRUE	TRUE	5.29	4	1	4	['C']	4	4	2	2	0	[[(2, 'S'), (2, 'R')]]	[2]	[4]	['racemic']	['C1']	4	4	8	RAC-2	contains following chiral atom(s)C	NA	8.406	35.455	12.722	90	106.65	90	3632.63	1.31602	C19 H18 Cl1 N1 O2 S1	rac-3-chloro-5-hydroxy-1-[(4-methylphenyl)methyl]-4-[(4-methylphenyl)sulfanyl]-1,5-dihydro-2H-pyrrol-2-one	293 K	None	423 K	colorless	beta polymorph	None	benzene	None	O.A.Lodochnikova, L.S.Kosolapova, A.F.Saifina, A.T.Gubaidullin, R.R.Fayzullin, A.R.Khamatgalimov, I.A.Litvinov, A.R.Kurbangalieva
FURQAM01	RACEMIC	ND_D_NI	Strict definition of kryptoracemate	KRYPTORACEMIC	NO	P21	4	TRUE	TRUE	10.38	2	1	4	['C']	4	0	2	2	0	[[(1, 'SR'), (1, 'RS')]]	[2]	[2]	['racemic']	['C1']	2	2	4	RAC-1	contains following chiral atom(s)C	NA	12.8578	14.1427	14.4105	90	110.053	90	2461.6	1.59604	0.8(C28 H19 Br1 N2 O4 S2),0.2(C14 H10 N2 O4 S2),0.2(C14 H9 Br1)	1-bromo-6,25-diallyl-3,9-dithia-6,25-diazaheptacyclo[9.6.6.32,10.02,10.04,8.012,17.018,23]hexacosa-4(8),12,14,16,18,20,22-heptaene-5,7,24,26-tetrone 2,6-diallyl-1H,5H-pyrrolo[3',4':5,6][1,4]dithiino[2,3-c]pyrrole-1,3,5,7(2H,6H)-tetrone 9-bromoanthracene	173 K	None	None	yellow	None	None	None	None	S.Khorasani, D.S.Botes, M.A.Fernandes, D.C.Levendis
FEJLOW	RACEMIC	ND_D_NI	Strict definition of kryptoracemate	KRYPTORACEMIC	NO	P21	4	TRUE	TRUE	3.84	2	1	2	['C']	2	0	1	1	0	[[(1, 'S'), (1, 'R')]]	[2]	[2]	['racemic']	['C1']	2	2	4	RAC-1	contains following chiral atom(s)C	NA	8.575	22.507	11.773	90	93.701	90	2267.42	1.55085	C29 H24 I1 N1 O1	3-(3-iodo-4-pyrrolidinophenyl)-3-phenyl-3H-naphtho[2,1-b]pyran	at 120 K	None	123-126 deg.C	colorless	None	None	None	None	C.D.Gabbutt, B.M.Heron, A.C.Instone, P.N.Horton, M.B.Hursthouse
FAZSOR	RACEMIC	ND_D_NI	Strict definition of kryptoracemate + achiral molecule	KRYPTORACEMIC	NO	P21	4	TRUE	TRUE	5.45	2	1	12	['C']	12	8	6	6	0	[[(1, 'RSRRSR'), (1, 'SRSSRS')]]	[2]	[2]	['racemic']	['C1']	5	2	4	RAC-1	contains following chiral atom(s)C	NA	11.9665	19.693	15.9001	90	109.008	90	3542.65	1.37564	C30 H22 F6 N4 O4,1.5(C2 H6 O1 S1)	3,8-bis(furan-2-yl)-4,9-diphenyl-2,7-bis(trifluoromethyl)-3a,4,8a,9-tetrahydro-3H,8H-dipyrazolo[1,5-a:1',5'-d]pyrazine-4,9-diol dimethyl sulfoxide solvate	296 K	None	None	colorless	None	None	None	None	Shuang Qin, Yan Zheng, Fa-guang Zhang, Jun-an Ma
EMUQIO	RACEMIC	ND_D_NI	Strict definition of kryptoracemate	KRYPTORACEMIC	NO	P21	4	TRUE	TRUE	8.42	2	1	2	['C']	2	2	1	1	0	[[(1, 'S'), (1, 'R')]]	[2]	[2]	['racemic']	['C1']	2	2	4	RAC-1	contains following chiral atom(s)C	NA	9.383	15.047	10.395	90	91.126	90	1467.35	1.26892	C20 H12 N2	2-(4-ethynylphenyl)azulene-1,1(8aH)-dicarbonitrile	122 K	None	None	None	None	None	None	None	A.Vlasceanu, C.L.Andersen, C.R.Parker, O.Hammerich, T.J.Morsing, M.Jevric, S.L.Broman, A.Kadziola, M.B.Nielsen
DUSCOL	RACEMIC	ND_D_NI	Strict definition of kryptoracemate	KRYPTORACEMIC	NO	P21	4	TRUE	TRUE	4.49	2	1	4	['C']	4	0	2	2	0	[[(1, 'SS'), (1, 'RR')]]	[2]	[2]	['racemic']	['C1']	2	2	4	RAC-1	contains following chiral atom(s)C	NA	5.8267	11.0347	21.6517	90	97.322	90	1380.76	1.17533	C13 H24 O4	8-isobutyl-10-methyl-6,7-dioxaspiro[4.5]decane-8,10-diol	294 K	None	337 K	colorless	None	None	None	None	L.Novkovic, M.Trmcic, M.Rodic, F.Bihelovic, M.Zlatar, R.Matovic, R.N.Saicic
DAHSIR	RACEMIC	ND_D_NI	Strict definition of kryptoracemate + achiral molecule	KRYPTORACEMIC	NO	P21	4	TRUE	TRUE	6.12	2	1	4	['C']	4	4	2	2	0	[[(1, 'SR'), (1, 'RS')]]	[2]	[2]	['racemic']	['C1']	3	2	4	RAC-1	contains following chiral atom(s)C	NA	11.1383	25.3721	12.0025	90	116.124	90	3045.42	1.26095	C37 H33 N3 O1,0.5(C1 H2 Cl2)	2-benzyl-3-((1-methyl-1H-indol-3-yl)methyl)-5-phenyl-N-(quinolin-8-yl)pent-4-enamide dichloromethane solvate	100 K	None	None	colorless	None	None	None	None	Zhen Liu, Tian Zeng, K.S.Yang, K.M.Engle
COBLIQ	RACEMIC	ND_D_NI	Strict definition of kryptoracemate	KRYPTORACEMIC	NO	P21	4	TRUE	TRUE	8.2	2	1	2	['C']	2	0	1	1	0	[[(1, 'S'), (1, 'R')]]	[2]	[2]	['racemic']	['C1']	2	2	4	RAC-1	contains following chiral atom(s)C	NA	10.7328	23.657	11.0874	90	115.219	90	2546.83	1.30262	C27 H25 Cl2 F1 N2 S1	4,6-bis(4-chlorophenyl)-N-(3-fluorophenyl)-3-isobutyl-6-methyl-3,6-dihydro-2H-1,3-thiazin-2-imine	at 293 K	None	373 K	colorless	None	None	None	None	I.Skrastina, A.Baran, D.Muceniece, J.Popelis
CIZGIC	RACEMIC	ND_D_NI	Strict definition of kryptoracemate + achiral molecule	KRYPTORACEMIC	NO	P21	4	TRUE	TRUE	4.11	2	1	4	['C']	4	4	2	2	0	[[(1, 'SS'), (1, 'RR')]]	[2]	[2]	['racemic']	['C1']	3	2	4	RAC-1	contains following chiral atom(s)C	NA	10.4584	10.6321	19.2537	90	97.473	90	2122.73	1.38979	C21 H24 N2 O3 S1,0.5(C1 H1 Cl3)	6,6-Dimethyl-1-phenyl-2-tosylhexahydro-3H-pyrrolo(1,2-c)imidazol-3-one chloroform solvate	at 123 K	None	None	colorless	None	None	None	None	K.Muniz, C.H.Hovelmann, E.Campos-Gomez, J.Barluenga, J.M.Gonzalez, J.Streuff, M.Nieger
CAYXAE	RACEMIC	ND_D_NI	Strict definition of kryptoracemate	KRYPTORACEMIC	NO	P21	4	TRUE	TRUE	5.59	2	1	2	['C']	2	2	1	1	0	[[(1, 'S'), (1, 'R')]]	[2]	[2]	['racemic']	['C1']	2	2	4	RAC-1	contains following chiral atom(s)C	NA	8.8169	22.4696	11.322	90	98.183	90	2220.19	1.36889	C26 H19 N1 O3 S2	2-[1-(1-methyl-1H-indol-3-yl)-2-oxo-2-(thiophen-2-yl)ethyl]phenyl thiophene-2-carboxylate	200 K	None	None	colorless	None	None	None	None	Yi-Ru Chen, G.M.Reddy, Shao-Hao Hong, Ying-Zheng Wang, Jhen-Kuei Yu, Wenwei Lin
CAPFIL	RACEMIC	ND_D_NI	Strict definition of kryptoracemate	KRYPTORACEMIC	NO	P21	4	TRUE	TRUE	4.88	2	1	2	['C']	2	2	1	1	0	[[(1, 'S'), (1, 'R')]]	[2]	[2]	['racemic']	['C1']	2	2	4	RAC-1	contains following chiral atom(s)C	NA	8.7134	19.0666	10.8529	90	95.331	90	1795.25	1.27804	C19 H20 F1 N1 O2 S1	N-(2-(4-fluorophenyl)cyclohex-2-en-1-yl)-4-methylbenzenesulfonamide	296 K	None	None	colorless	None	None	None	None	Meng-Yang Chang, Yi-Chia Chen, Chieh-Kai Chan
CAKDOK	RACEMIC	ND_D_NI	Contains also at least an other enantiomer in enantiopure proportion	KRYPTORACEMIC	NO	P21	4	TRUE	TRUE	5.45	4	2	72	['C']	72	72	57	15	0	[[(2, 'RRRRRRRRRRRRRRRRRRRRRSRRSRSRSRSRSRS')], [(1, 'S'), (1, 'R')]]	[1, 2]	[2, 2]	['chiral', 'racemic']	['C1']	4	2	4	RAC-1	contains following chiral atom(s)C	NA	10.7521	52.786	16.131	90	108.418	90	8686.35	1.20029	C63 H112 O35,C8 H9 F1 O1	(rac)-1-(4-fluorophenyl)ethan-1-ol 36,37,38,39,40,41,42,43,44,45,46,47,48,49-tetradecamethoxy-5,10,15,20,25,30,35-heptakis(methoxymethyl)-2,4,7,9,12,14,17,19,22,24,27,29,32,34-tetradecaoxaoctacyclo[31.2.2.23,6.28,11.213,16.218,21.223,26.228,31]nonatetracontane	296 K	None	None	colorless	None	None	None	None	Y.Amharar, A.Grandeury, M.Sanselme, S.Petit, G.Coquerel
BEXGUI	RACEMIC	ND_D_NI	Contains also at least an other enantiomer in enantiopure proportion + achiral molecule	KRYPTORACEMIC	NO	P21	4	TRUE	TRUE	4.21	4	2	4	['C']	4	4	1	3	0	[[(2, 'S')], [(1, 'S'), (1, 'R')]]	[1, 2]	[2, 2]	['chiral', 'racemic']	['C1']	6	2	4	RAC-1	contains following chiral atom(s)C	NA	13.122	5.898	24.075	90	95.56	90	1854.48	1.30159	C14 H14 O3,C5 H9 N1 O2,H2 O1	Pyrrolidinium-2-carboxylate 2-(6-methoxy-2-naphthyl)propanoic acid monohydrate	293 K	None	None	colorless	None	None	None	None	A.Tilborg, G.Springuel, B.Norberg, J.Wouters, T.Leyssens
BACTUX	RACEMIC	ND_D_NI	Strict definition of kryptoracemate	KRYPTORACEMIC	NO	P21	4	TRUE	TRUE	5.67	2	1	2	['P']	0	0	1	1	0	[[(1, 'S'), (1, 'R')]]	[2]	[2]	['racemic']	['C1']	2	2	4	RAC-1	contains following chiral atom(s)P	NA	10.3219	14.7114	15.3878	90	100.192	90	2299.76	1.45745	C30 H17 P1 S3	1-Phenyl-2-(3-thienyl)-1H-phenanthro[9',10',1':3,4,5]phosphindolo[6,7-b]thiophene 1-sulfide	150 K	None	None	orange	None	None	None	None	W.Delaunay, R.Szucs, S.Pascal, A.Mocanu, P.-A.Bouit, L.Nyulaszi, M.Hissler
ACICEU	RACEMIC	ND_D_NI	Strict definition of kryptoracemate	KRYPTORACEMIC	NO	P21	4	TRUE	TRUE	4.41	2	1	2	['C']	2	0	1	1	0	[[(1, 'S'), (1, 'R')]]	[2]	[2]	['racemic']	['C1']	2	2	4	RAC-1	contains following chiral atom(s)C	NA	12.584	10.083	13.956	90	102.57	90	1728.36	1.31581	C23 H18 O3	1-Oxo-13c-propoxy-1,13c-dihydrodibenzo(a,kl)xanthene	at 293 K	None	None	yellow	None	None	acetone	None	Duan-Min Tan, Yue-Peng Cai, Miao-Fen Liao, Cheng-Yong Su, Zun-Le Xu, Bei-Sheng Kang
ABIVIT	RACEMIC	ND_D_NI	Strict definition of kryptoracemate	KRYPTORACEMIC	NO	P21	4	TRUE	TRUE	3.13	2	1	14	['C']	14	12	7	7	0	[[(1, 'RRSSRRS'), (1, 'SSRRSSR')]]	[2]	[2]	['racemic']	['C1']	2	2	4	RAC-1	contains following chiral atom(s)C	NA	7.2978	14.6967	18.417	90	98.629	90	1952.93	1.46697	C22 H23 Br1 O4	2-Methoxy-3-vinyl-2a,2a1,5,5a,6,7,8,8a-octahydro-2H-2,5-methanonaphtho[1,8-bc]furan-9-yl 4-bromobenzoate	173 K	None	None	colorless	None	None	None	None	L.Rycek, J.J.Hayward, M.A.Latif, J.Tanko, R.Simionescu, T.Hudlicky
[truncated: 54 more columns]

## Sheet: Feuil2
Étiquettes de lignes	Nombre de Identifier
NC_D_I	28
NC_ND_I	72
NC_ND_NI	522
ND_D_NI	126
(vide)
Total général	748

## Sheet: Feuil1
Identifier	Class	Subset	Note	Kryptoracemic?	Diast?	Space Gp. Symbol	Space Gp. Number	Is Sohncke?	Has Disorder?	R-factor	Number of chiral resd	Number of chiral families	Number of chiral center	Chiral Atom Symb	Number of Carbon Chiral Atom	Number of Chiral Center having H	R	S	M	Number and type of chiral configuration	Number of chiral configuration	Number of molecule in Family	AU_chirality	point_group_of_chiral_mol	Unique Chemical Units	Z Prime	Z Value	Note1	Note2	Note3	a	b	c	Alpha	Beta	Gamma	Cell Volume	Calc. Density	formula	Compound Name	Study Temp.	pressure	melting_point	color	polymorph	phase_transitions	recrystallisation_solvent	remarks	authors_comma_delimited
ABADUD	RACEMIC	NC_ND_NI	Contains also at least an other enantiomer in enantiopure proportion	KRYPTORACEMIC	NO	P21	4	TRUE	FALSE	5.03	3	2	4	['C']	4	4	2	2	0	[[(1, 'RS')], [(1, 'S'), (1, 'R')]]	[1, 2]	[1, 2]	['chiral', 'racemic']	['C1']	3	1.0	2.0	RAC-1	contains following chiral atom(s)C	NA	5.693	20.1357	14.9662	90.0	98.233	90.0	1697.93226865	1.37668728527	C10 H11 N1 O3 S1,2(C11 H13 N1 O3 S1)	trans-3-Methyl-4-(phenylsulfonyl)azetidin-2-one bis(3,3-dimethyl-4-(phenylsulfonyl)azetidin-2-one)	at 293 K	None	None	None	None	None	hexane/ethyl acetate	None	A.Basak, S.S.Bag, P.A.Mazumdar, V.Bertolasi, A.K.Das
ABAPUQ	RACEMIC	NC_ND_I	Strict definition of kryptoracemate + achiral molecule	KRYPTORACEMIC	NO	P1	1	TRUE	FALSE	4.27	2	1	2	['C']	2	2	1	1	0	[[(1, 'S'), (1, 'R')]]	[2]	[2]	['racemic']	['C1']	5	2.0	2.0	RAC-1	contains following chiral atom(s)C	NA	7.8614	9.41	11.8477	85.783	78.159	89.45	855.456949285	1.36149539786	C13 H19 Cl1 N1 O1 1+,0.5(C3 H8 O1),Br1 1-	N-t-Butyl-1-(3-chlorophenyl)-1-oxopropan-2-aminium bromide propan-1-ol solvate	at 296 K	None	None	colorless	None	None	None	None	Min Liu, Xiu-Rong Hu, Jian-Ming Gu, Gu-Ping Tang
ABEGET	RACEMIC	NC_ND_NI	Strict definition of kryptoracemate	KRYPTORACEMIC	NO	P1	1	TRUE	FALSE	7.6	4	1	8	['C']	8	4	4	4	0	[[(2, 'SS'), (2, 'RR')]]	[2]	[4]	['racemic']	['C1']	4	4.0	4.0	RAC-2	contains following chiral atom(s)C	NA	9.883	11.579	15.089	75.715	73.51	74.457	1567.67980273	1.09481257195	C18 H26 O1	trans-2,3,4,4a,9,9a-hexahydro-1,1,4a,6,8-pentamethyl-1H-xanthene	at 298 K	None	None	colorless	None	None	None	None	S.Nakamura, K.Ishihara, H.Yamamoto
ABOBUR	RACEMIC	NC_ND_NI	Strict definition of kryptoracemate + achiral molecule	KRYPTORACEMIC	NO	P1	1	TRUE	FALSE	6.42	2	1	4	['C']	4	4	2	2	0	[[(1, 'SR'), (1, 'RS')]]	[2]	[2]	['racemic']	['C1']	3	2.0	2.0	RAC-1	contains following chiral atom(s)C	NA	9.3736	9.757	11.672	73.534	89.493	67.705	941.313269904	1.24687677015	C23 H20 O3,0.5(H2 O1)	(3R*,4S*)-4-(2-hydroxyphenyl)-3-methyl-5,5-diphenyldihydrofuran-2(3H)-one hemihydrate	298 K	None	440-442 K	colorless	None	None	None	None	N.Kise, Y.Hamada, T.Sakurai
ABUQOF	RACEMIC	NC_ND_NI	Strict definition of kryptoracemate	KRYPTORACEMIC	NO	P21	4	TRUE	FALSE	5.79	2	1	4	['C']	4	2	2	2	0	[[(1, 'SS'), (1, 'RR')]]	[2]	[2]	['racemic']	['C1']	2	2.0	4.0	RAC-1	contains following chiral atom(s)C	NA	8.1397	32.018	9.9603	90.0	97.59	90.0	2573.0796353	1.34380264758	C33 H28 O6	2-(2-Acetylphenyl)-5',6-dimethoxy-5-(methoxymethoxy)-2H,4'H-spiro[acenaphthylene-1,1'-naphthalen]-4'-one	at 173 K	None	None	colorless	None	None	None	None	Yukai Fan, Pengju Feng, Mao Liu, Hongjie Pan, Yian Shi
ACUBAC	RACEMIC	NC_ND_I	Strict definition of kryptoracemate + achiral molecule	KRYPTORACEMIC	NO	P1	1	TRUE	FALSE	2.68	2	1	2	['P']	0	0	1	1	0	[[(1, 'S'), (1, 'R')]]	[2]	[2]	['racemic']	['C1']	9	2.0	2.0	RAC-1	contains following chiral atom(s)P	NA	7.1069	8.6975	16.3963	86.0044	85.557	80.2812	994.291445901	1.38108943806	C14 H24 N4 P1 S1 1+,0.5(O4 S1 2-),3(H2 O1)	13-Phenyl-1,7,10-triaza-4-azonia-13Î»5-phosphabicyclo(8.2.1)tridecane-13-thione hemikis(sulfate) trihydrate	at 150 K	None	None	colorless	None	None	None	None	T.Vitha, J.Kotek, J.Rudovsky, V.Kubicek, I.Cisarova, P.Hermann, I.Lukes
ADARII	RACEMIC	NC_ND_NI	Strict definition of kryptoracemate	KRYPTORACEMIC	NO	C2	5	TRUE	FALSE	4.65	2	1	12	['C']	12	12	6	6	0	[[(1, 'SRSRSR'), (1, 'RSRSRS')]]	[2]	[2]	['racemic']	['C1']	2	2.0	8.0	RAC-1	contains following chiral atom(s)C	NA	21.28	8.395	10.57	90.0	114.381	90.0	1719.88796111	1.93228084204	C6 H6 F4 O4 S1	4,5,6,7-Tetrafluorohexahydro-1,3,2-benzodioxathiole 2,2-dioxide	at 173 K	None	None	colorless	None	None	None	None	A.J.Durie, A.M.Z.Slawin, T.Lebl, D.O'Hagan
AFUCUC	RACEMIC	NC_ND_NI	Strict definition of kryptoracemate	KRYPTORACEMIC	NO	P212121	19	TRUE	FALSE	6.8	2	1	2	['C']	2	2	1	1	0	[[(1, 'S'), (1, 'R')]]	[2]	[2]	['racemic']	['C1']	2	2.0	8.0	RAC-1	contains following chiral atom(s)C	NA	7.7082	21.174	22.6742	90.0	90.0	90.0	3700.73388195	1.22550988383	C23 H19 N1 O2	2-(3,5-diphenyl-1,2-oxazol-4-yl)-1-phenylethan-1-ol	296 K	None	None	None	None	None	None	None	Wen Wei, Yuhai Tang, Yan Zhou, Ge Deng, Ziyu Liu, Jun Wu, Yang Li, Junjie Zhang, Silong Xu
AKOXIH	RACEMIC	NC_ND_NI	Strict definition of kryptoracemate	KRYPTORACEMIC	NO	P1	1	TRUE	FALSE	10.83	4	1	12	['C']	12	12	6	6	0	[[(2, 'SRR'), (2, 'RSS')]]	[2]	[4]	['racemic']	['C1']	4	4.0	4.0	RAC-2	contains following chiral atom(s)C	NA	6.618	14.935	25.302	79.6	89.994	89.968	2459.75978371	1.23839815595	C29 H30 O3 S1	12-t-Butyl-3-(p-tolylsulfinyl)-4a,5,7,8,12b,12c-hexahydrobenzo(c)phenanthrene-1,4-dione	at 296 K	None	None	None	None	None	None	None	M.C.Carreno, S.Garcia-Cerrada, M.J.Sanz-Cuesta, A.Urbano
AKUBEP	RACEMIC	NC_ND_NI	Strict definition of kryptoracemate	KRYPTORACEMIC	NO	P21	4	TRUE	FALSE	3.25	2	1	2	['C']	2	2	1	1	0	[[(1, 'S'), (1, 'R')]]	[2]	[2]	['racemic']	['C1']	2	2.0	4.0	RAC-1	contains following chiral atom(s)C	NA	7.7089	11.7832	17.474	90.0	100.653	90.0	1559.90292258	1.18959583399	C19 H21 N1 O1	(5,6-dimethyl-2,3,4,5-tetrahydro-1H-1-benzazepin-1-yl)(phenyl)methanone	173 K	None	None	colorless	None	None	None	None	H.Tabata, T.Yoneda, T.Tasaka, S.Ito, T.Oshitari, H.Takahashi, H.Natsugari
ALEXAQ	RACEMIC	NC_ND_NI	Strict definition of kryptoracemate	KRYPTORACEMIC	NO	P21	4	TRUE	FALSE	3.24	2	1	4	['C']	4	4	2	2	0	[[(1, 'SR'), (1, 'RS')]]	[2]	[2]	['racemic']	['C1']	2	2.0	4.0	RAC-1	contains following chiral atom(s)C	NA	9.7284	10.1166	16.724	90.0	100.994	90.0	1615.74035074	1.41556830942	C21 H16 F4	(E,E)-2-Benzylidene-3-(2,3,5,6-tetrafluorobenzylidene)bicyclo(2.2.1)heptane	at 173 K	None	None	colorless	None	None	None	None	Jin Liu, E.L.Suits, K.J.Boarman
APOYAG	RACEMIC	NC_ND_NI	Strict definition of kryptoracemate	KRYPTORACEMIC	NO	P21	4	TRUE	FALSE	3.63	2	1	4	['C']	4	4	2	2	0	[[(1, 'SS'), (1, 'RR')]]	[2]	[2]	['racemic']	['C1']	2	2.0	4.0	RAC-1	contains following chiral atom(s)C	NA	12.9175	7.843	17.9211	90.0	91.152	90.0	1815.25465362	1.33711092809	C25 H19 N1 O2	17-Methyl-1-phenyl-17-azapentacyclo[6.6.5.02,7.09,14.015,19]nonadeca-2,4,6,9,11,13-hexaene-16,18-dione	at 293 K	None	280-282 deg.C	colorless	None	None	None	None	K.Nikitin, C.Fleming, H.Muller-Bunz, Y.Ortin, M.J.McGlinchey
AQABID	RACEMIC	NC_ND_NI	Strict definition of kryptoracemate	KRYPTORACEMIC	NO	P21	4	TRUE	FALSE	8.24	2	1	4	['C']	4	4	2	2	0	[[(1, 'SS'), (1, 'RR')]]	[2]	[2]	['racemic']	['C2']	2	2.0	4.0	RAC-1	contains following chiral atom(s)C	NA	10.144	15.382	13.469	90.0	106.173	90.0	2018.46340309	1.1862613426	C28 H24	(2R*,2'R*)-(P*,P*)-(Z)-(+-)-2,2'-dimethyl-2,2',3,3'-tetrahydro-1,1'-bicyclopenta(a)naphthalenylidene	at 100 K	None	178.6-179.6 deg.C	colorless	None	None	ethanol/ethyl acetate	None	M.K.J.ter Wiel, R.A.van Delden, A.Meetsma, B.L.Feringa
AREZEE	RACEMIC	NC_ND_NI	Strict definition of kryptoracemate	KRYPTORACEMIC	NO	P21	4	TRUE	FALSE	6.65	2	1	4	['B']	0	0	2	2	0	[[(1, 'SS'), (1, 'RR')]]	[2]	[2]	['racemic']	['C1']	2	2.0	4.0	RAC-1	contains following chiral atom(s)B	NA	9.19	30.098	10.4179	90.0	102.688	90.0	2811.23061968	1.25289471872	C35 H32 B2 N4	5,11-dimethyl-14-methylene-1,7,13,13-tetraphenyl-2,5,8,11-tetraaza-1,7-diboratetracyclo[5.5.2.02,6.08,12]tetradeca-2(6),3,8(12),9-tetraene	103 K	None	None	colorless	None	None	None	None	Baolin Wang, Yongxin Li, Rakesh Ganguly, H.Hirao, Rei Kinjo
AWURUH	RACEMIC	NC_ND_NI	Strict definition of kryptoracemate	KRYPTORACEMIC	NO	P21	4	TRUE	FALSE	3.18	2	1	6	['C']	6	4	3	3	0	[[(1, 'RRS'), (1, 'SSR')]]	[2]	[2]	['racemic']	['C1']	2	2.0	4.0	RAC-1	contains following chiral atom(s)C	NA	6.3424	16.9401	9.9234	90.0	103.8763	90.0	1035.06331609	1.3363904054	C12 H16 O3	3,3',4,4',4a',7',8',8a'-octahydro-5H-spiro[furan-2,1'-isochromen]-5-one	100 K	None	None	yellow	None	None	None	None	D.C.Davis, K.L.Walker, Chunhua Hu, R.N.Zare, R.M.Waymouth, Mingji Dai
AWUYAT	RACEMIC	NC_ND_NI	Strict definition of kryptoracemate	KRYPTORACEMIC	NO	P212121	19	TRUE	FALSE	4.83	2	1	4	['C']	4	4	2	2	0	[[(1, 'SS'), (1, 'RR')]]	[2]	[2]	['racemic']	['C1']	2	2.0	8.0	RAC-1	contains following chiral atom(s)C	NA	10.41	12.688	17.124	90.0	90.0	90.0	2261.77353792	1.2760739661	C13 H15 N1 O2	5-methyl-1,2,3,3a-tetrahydrobenzo[e]pyrrolo[2,1-b]-[1,3]oxazepin-10(5H)-one	at 296 K	None	None	colorless	None	None	None	None	Y.Z.Jin, R.-H.Zhang, D.-X.Fu, Y.-K.Lv
AXIXUB	RACEMIC	NC_ND_NI	Strict definition of kryptoracemate	KRYPTORACEMIC	NO	P1	1	TRUE	FALSE	4.44	2	1	6	['C']	6	6	3	3	0	[[(1, 'SRR'), (1, 'RSS')]]	[2]	[2]	['racemic']	['C1']	2	2.0	2.0	RAC-1	contains following chiral atom(s)C	NA	7.2949	7.4896	9.1863	69.591	72.516	70.028	432.637201208	1.52117830407	C7 H12 F2 O4	3,3-Difluoro-2-(hydroxymethyl)-6-methoxytetrahydro-2H-pyran-4-ol	at 150 K	None	None	colorless	None	None	None	None	G.T.Giuffredi, B.Bernet, V.Gouverneur
BADJAT	SCALEMIC	NC_ND_NI	Unbalanced Kryptoracemate	KRYPTORACEMIC	NO	P212121	19	TRUE	FALSE	3.72	3	1	6	['C']	6	0	4	2	0	[[(1, 'SS'), (2, 'RR')]]	[2]	[3]	['scalemic']	['C1']	3	3.0	12.0	scal-3-attention could contain stereoisomer	contains following chiral atom(s)C	NA	10.0807	19.0872	22.99	90.0	90.0	90.0	4423.55962855	1.55087473928	C15 H15 F3 N2 O4	rel-(4aR,10bR)-10b-Hydroxy-4a-(hydroxymethyl)-3-(trifluoroacetyl)-2,3,4,4a,6,10b-hexahydrobenzo[c][2,7]naphthyridin-5(1H)-one	at 100 K	None	208-211 deg.C	colorless	None	None	None	None	S.G.Stewart, E.L.Ghisalberti, B.W.Skelton, C.H.Heath
BAXJOC	RACEMIC	NC_ND_NI	Strict definition of kryptoracemate + achiral molecule	KRYPTORACEMIC	NO	P21	4	TRUE	FALSE	25.42	2	1	4	['C']	4	4	2	2	0	[[(1, 'SS'), (1, 'RR')]]	[2]	[2]	['racemic']	['C1']	4	2.0	4.0	RAC-1	contains following chiral atom(s)C	NA	16.42	5.9044	25.212	90.0	90.487	90.0	2444.22135754	1.33539626443	C27 H22 N2 O2,C1 H2 Cl2	4-[oxy(phenyl)iminio]-2,3,5-triphenyl-1,2-oxazolidine dichloromethane solvate	200 K	None	None	colorless	None	None	None	None	Jinxian Liu, M.Skaria, P.Sharma, Yun-Wei Chiang, Rai-Shung Liu
BAZGOZ	RACEMIC	NC_ND_NI	Strict definition of kryptoracemate	KRYPTORACEMIC	NO	P212121	19	TRUE	FALSE	3.62	2	1	8	['C']	8	6	4	4	0	[[(1, 'RSSS'), (1, 'SRRR')]]	[2]	[2]	['racemic']	['C1']	2	2.0	8.0	RAC-1	contains following chiral atom(s)C	NA	8.363	14.999	18.242	90.0	90.0	90.0	2288.21513215	1.66728770729	C9 H12 F3 N1 O6	methyl (1S,2R,3R,4R)-2,3,4-trihydroxy-1-(2,2,2-trifluoroacetylamino)cyclopentanecarboxylate	at 293 K	None	124-125deg.C	colorless	None	None	chloroform/acetone	None	M.Kummeter, U.Kazmaier
BEGGAV	RACEMIC	NC_ND_NI	Strict definition of kryptoracemate	KRYPTORACEMIC	NO	P21	4	TRUE	FALSE	5.16	2	1	2	['C']	2	2	1	1	0	[[(1, 'S'), (1, 'R')]]	[2]	[2]	['racemic']	['C1']	2	2.0	4.0	RAC-1	contains following chiral atom(s)C	NA	7.336	20.981	12.706	90.0	90.96	90.0	1955.39001717	1.2107017895	C22 H20 N4 O1	4,5-Dihydro-N1,N2,5-triphenyl-1,2,4-oxadiazole-3-carbamidine	at 173 K	None	442-443K	colorless	None	None	None	None	D.M.Argilagos, R.W.Kunz, A.Linden, H.Heimgartner
BEMHPO	RACEMIC	NC_ND_NI	Strict definition of kryptoracemate	KRYPTORACEMIC	NO	P212121	19	TRUE	FALSE	8.8	2	1	2	['C']	2	2	1	1	0	[[(1, 'S'), (1, 'R')]]	[2]	[2]	['racemic']	['C1']	2	2.0	8.0	RAC-1	contains following chiral atom(s)C	NA	13.911	14.184	19.63	90.0	90.0	90.0	3873.26643912	1.20181670932	C21 H22 N2 O3	1-Benzoyl-2-ethoxymethyl-4-methyl-5-phenyl-1,2,3,4-tetrahydropyridazin-3-one	None	None	None	None	None	None	None	None	J.A.Moore, B.Staskun, J.F.Blount
BERCIL	RACEMIC	NC_ND_NI	Strict definition of kryptoracemate	KRYPTORACEMIC	NO	P1121	4	TRUE	FALSE	7.28	2	1	4	['C']	4	4	2	2	0	[[(1, 'SS'), (1, 'RR')]]	[2]	[2]	['racemic']	['C1']	2	2.0	4.0	RAC-1	contains following chiral atom(s)C	NA	9.583	11.55	20.46	90.0	90.0	98.69	2238.59063013	1.38126779589	C26 H19 N5 O2 S1	2,8-Diphenyl-5-(3-pyridyl)-7-(2-thienyl)-5,8-dihydro-(1,2,4)triazolo(1,2-a)(1,2,4)triazine-1,3-dione	at 293 K	None	147-149deg.C	colorless	None	None	None	The structure is 9c, not 9a as given in the paper	F.Palacios, C.Alonso, G.Rubiales, C.Tobillas, J.M.Ezpeleta
BERGUC	RACEMIC	NC_ND_NI	Strict definition of kryptoracemate	KRYPTORACEMIC	NO	P21	4	TRUE	FALSE	4.23	2	1	6	['C']	6	2	3	3	0	[[(1, 'RRS'), (1, 'SSR')]]	[2]	[2]	['racemic']	['C1']	2	2.0	4.0	RAC-1	contains following chiral atom(s)C	NA	12.0754	8.3976	16.5603	90.0	108.307	90.0	1594.29337169	1.30564693875	C19 H23 N1 O3	3-((Z)-((1S*,4S*,5R*)-1,4-Dimethyl-5-phenyl-8-oxabicyclo[3.2.1]octan-2-ylidene)methyl)oxazolidin-2-one	at 100 K	None	116 deg.C	colorless	None	None	None	None	H.Faustino, I.Alonso, J.L.Mascarenas, F.Lopez
BETNUK	RACEMIC	NC_ND_NI	Strict definition of kryptoracemate	KRYPTORACEMIC	NO	P212121	19	TRUE	FALSE	7.62	2	1	4	['C']	4	4	2	2	0	[[(1, 'SS'), (1, 'RR')]]	[2]	[2]	['racemic']	['C1']	2	2.0	8.0	RAC-1	contains following chiral atom(s)C	NA	10.288	37.98	8.809	90.0	90.0	90.0	3442.01315616	1.29610679018	C21 H18 Cl1 N1 O1	2-(3-Chlorophenyl)-3,5-diphenylisoxazolidine	at 293 K	None	None	None	None	None	hexane	None	H.Mallesha, K.R.Ravikumar, M.P.Sadashiva, K.S.Rangappa, H.C.Devarajegowda, V.B.Devaru, J.S.Prasad
BIFLAD	RACEMIC	NC_ND_NI	Strict definition of kryptoracemate	KRYPTORACEMIC	NO	P21	4	TRUE	FALSE	5.7	2	1	2	['C']	2	0	1	1	0	[[(1, 'S'), (1, 'R')]]	[2]	[2]	['racemic']	['C1']	2	2.0	4.0	RAC-1	contains following chiral atom(s)C	NA	8.754	16.818	10.465	90.0	105.5	90.0	1484.67241496	1.31235394217	C13 H15 N3 O3 S1	4-Acetyl-2-acetylamino-5-methyl-5-phenyl-Î”2-1,3,4-thiadiazolin-1-oxide	None	None	None	None	None	None	None	Bond N3-C12 in molecule B should be 1.363 not 1.428	S.Kubota, K.Toyooka, N.Yamamoto, M.Shibuya, M.Kido
BIKCUV	RACEMIC	NC_ND_NI	Strict definition of kryptoracemate	KRYPTORACEMIC	NO	P212121	19	TRUE	FALSE	5.41	2	1	2	['C']	2	2	1	1	0	[[(1, 'S'), (1, 'R')]]	[2]	[2]	['racemic']	['C1']	2	2.0	8.0	RAC-1	contains following chiral atom(s)C	NA	8.1508	17.5996	28.8453	90.0	90.0	90.0	4137.88192892	1.0963158982	C25 H27 N1	N-(2,2-Dimethyl-1-phenylpropylidene)-1,2-diphenylethanamine	at 293 K	None	None	colorless	None	None	None	None	W.Brian Jennings, N.O'Connell, J.F.Malone, D.R.Boyd
BINGOU	RACEMIC	NC_ND_NI	Strict definition of kryptoracemate	KRYPTORACEMIC	NO	P21	4	TRUE	FALSE	4.4	2	1	6	['C']	6	2	3	3	0	[[(1, 'SRS'), (1, 'RSR')]]	[2]	[2]	['racemic']	['C1']	2	2.0	4.0	RAC-1	contains following chiral atom(s)C	NA	13.852	6.75	13.096	90.0	116.69	90.0	1094.01953263	1.25813342537	C11 H13 N1 O3	(1RS,5RS,7SR)-1-Acetoxy-7-cyano-5-methylbicyclo(3.2.0)heptan-2-one	None	None	None	colorless	None	None	None	None	A.Furusaki, K.Abe, T.Matsumoto
BISCEO	RACEMIC	NC_ND_NI	Strict definition of kryptoracemate	KRYPTORACEMIC	NO	P21	4	TRUE	FALSE	4.55	2	1	2	['Si']	0	0	1	1	0	[[(1, 'S'), (1, 'R')]]	[2]	[2]	['racemic']	['C1']	2	2.0	4.0	RAC-1	contains following chiral atom(s)Si	NA	8.8118	11.1432	25.9741	90.0	93.025	90.0	2546.88595706	1.21173039153	C29 H28 N2 O2 Si1	2-(t-butyl(2-(2-(4-nitrophenyl)ethenyl)phenyl)phenylsilyl)pyridine	296 K	None	None	light yellow	None	None	None	None	Ma WeiYang
BISFER	RACEMIC	NC_ND_NI	Strict definition of kryptoracemate + achiral molecule	KRYPTORACEMIC	NO	P21	4	TRUE	FALSE	5.48	4	1	4	['B']	0	0	2	2	0	[[(2, 'S'), (2, 'R')]]	[2]	[4]	['racemic']	['C1']	8	4.0	8.0	RAC-2	contains following chiral atom(s)B	NA	10.7147	34.282	10.9168	90.0	93.176	90.0	4003.81458069	1.32061710163	C19 H14 B2 N2 O3,C3 H6 O1	spiro[2,1,3-benzoxadiborole-1,6'-pyrido[2',1':2,3]imidazo[1,5-c][1,3,2]benzoxazaborinin]-3(1H)-ol acetone solvate	100 K	None	None	colorless	None	None	None	None	S.E.Kutniewska, K.N.Jarzembska, R.Kaminski, A.J.Stasyuk, D.T.Gryko, M.K.Cyranski
BIWYIR	RACEMIC	NC_ND_NI	Strict definition of kryptoracemate	KRYPTORACEMIC	NO	P1	1	TRUE	FALSE	6.19	4	1	4	['C']	4	4	2	2	0	[[(2, 'S'), (2, 'R')]]	[2]	[4]	['racemic']	['C1']	4	4.0	4.0	RAC-2	contains following chiral atom(s)C	NA	9.5351	12.1609	17.2642	90.159	90.134	94.762	1994.95265886	1.19108441562	C25 H27 N1 O1	2-(1-(9H-fluoren-9-yl)pyrrolidin-2-yl)-4,5-dimethylphenol	at 296 K	None	None	colorless	None	None	ethanol	None	S.Haldar, S.Mahato, C.K.Jana
BOGYUS	RACEMIC	NC_ND_NI	Strict definition of kryptoracemate	KRYPTORACEMIC	NO	P212121	19	TRUE	FALSE	6.73	2	1	2	['C']	2	2	1	1	0	[[(1, 'S'), (1, 'R')]]	[2]	[2]	['racemic']	['C1']	2	2.0	8.0	RAC-1	contains following chiral atom(s)C	NA	7.8235	18.7193	20.708	90.0	90.0	90.0	3032.69578503	1.22790567529	C17 H16 N2 O2	Ethyl 3,3-dicyano-2-phenylcyclopentene-4-carboxylate	at 293 K	None	64-65 deg.C	colorless	None	None	None	None	Zheng Lu, Suqing Zheng, Xumu Zhang, Xiyan Lu
BOKSOL	RACEMIC	NC_ND_NI	Strict definition of kryptoracemate	KRYPTORACEMIC	NO	P21	4	TRUE	FALSE	2.69	2	1	4	['C']	4	2	2	2	0	[[(1, 'SS'), (1, 'RR')]]	[2]	[2]	['racemic']	['C1']	2	2.0	4.0	RAC-1	contains following chiral atom(s)C	NA	6.904	28.724	8.0911	90.0	90.129	90.0	1604.54598734	1.18970562377	C21 H21 N1	2-phenyl-2-(1,2,3,4-tetrahydronaphthalen-1-yl)pent-4-enenitrile	at 100 K	None	None	colorless	None	None	None	None	Tapan Maji, K.Ramakumar, J.A.Tunge
BONKEW	RACEMIC	NC_ND_NI	Strict definition of kryptoracemate	KRYPTORACEMIC	NO	P1	1	TRUE	FALSE	6.6	2	1	2	['C']	2	2	1	1	0	[[(1, 'S'), (1, 'R')]]	[2]	[2]	['racemic']	['C1']	2	2.0	2.0	RAC-1	contains following chiral atom(s)C	NA	7.8017	10.359	16.9174	75.083	81.214	80.991	1295.76651916	1.28311827821	C38 H28 O1	(4-Methylphenyl)(2-(9-(4-methylphenyl)-7H-benzo[de]anthracen-7-yl)phenyl)methanone	at 100 K	None	213-216 deg.C	colorless	None	None	None	None	A.Criado, M.Vilas-Varela, A.Cobas, D.Perez, D.Pena, Enrique Guitian
CABXIM	RACEMIC	NC_ND_NI	Strict definition of kryptoracemate	KRYPTORACEMIC	NO	P21	4	TRUE	FALSE	6.2	2	1	2	['C']	2	2	1	1	0	[[(1, 'S'), (1, 'R')]]	[2]	[2]	['racemic']	['C1']	2	2.0	4.0	RAC-1	contains following chiral atom(s)C	NA	4.847	7.815	21.28	90.0	96.56	90.0	800.794069965	1.54468653051	C7 H10 N2 O2 S1	9-Thia-1,5-diazabicyclo(5.3.0)decane-2,6-dione	None	None	179-80deg.C	colorless	None	None	None	None	A.V.Eremeev, O.N.Krutius, A.F.Mishnev, Ya.Ya.Bleidelis, I.P.Sekatsis
CACKOJ	RACEMIC	NC_ND_NI	Strict definition of kryptoracemate	KRYPTORACEMIC	NO	P212121	19	TRUE	FALSE	2.56	2	1	2	['C']	2	2	1	1	0	[[(1, 'S'), (1, 'R')]]	[2]	[2]	['racemic']	['C1']	2	2.0	8.0	RAC-1	contains following chiral atom(s)C	NA	7.6294	12.6995	25.8239	90.0	90.0	90.0	2502.06644535	1.5832995465	C14 H7 F5 N2	anilino(pentafluorophenyl)acetonitrile	100 K	None	None	colorless	P212121 krypto polymorph	None	evaporation	None	R.Laubenstein, M.-D.Serb, U.Englert, G.Raabe, T.Braun, B.Braun
CANJAF	RACEMIC	NC_ND_NI	Strict definition of kryptoracemate	KRYPTORACEMIC	NO	P21	4	TRUE	FALSE	13.29	4	1	4	['C']	4	0	2	2	0	[[(2, 'S'), (2, 'R')]]	[2]	[4]	['racemic']	['C1']	4	4.0	8.0	RAC-2	contains following chiral atom(s)C	NA	13.803	14.747	21.885	90.0	108.236	90.0	4231.01666333	1.19783845173	C27 H27 N1 O1	N,3'-diphenyl-2',3'-dihydrospiro[cyclohexane-1,1'-indene]-3'-carboxamide	296 K	None	None	colorless	None	None	dichloromethane/Hexane	None	Ming Hu, Jin-Heng Li
CASXEB	RACEMIC	NC_ND_I	Strict definition of kryptoracemate + achiral molecule	KRYPTORACEMIC	NO	P1	1	TRUE	FALSE	5.31	2	1	8	['C' 'N']	6	6	4	4	0	[[(1, 'SRSR'), (1, 'RSRS')]]	[2]	[2]	['racemic']	['C1']	6	2.0	2.0	RAC-1	contains following chiral atom(s)N,C	NA	8.3955	9.8351	10.8184	73.265	72.228	66.195	764.242819498	1.50469579511	C15 H22 N1 O2 1+,H2 O1,Br1 1-	7-(Hydroxymethyl)-1-(3-hydroxyphenyl)-6-methyl-6-azoniabicyclo[3.2.1]octane bromide monohydrate	at 100 K	None	None	colorless	None	None	None	None	M.R.Iyer, Yong Sok Lee, J.R.Deschamps, C.M.Dersch, R.B.Rothman, A.E.Jacobson, K.C.Rice
CAWQEW	RACEMIC	NC_ND_NI	Strict definition of kryptoracemate + achiral molecule	KRYPTORACEMIC	NO	P21	4	TRUE	FALSE	6.2	2	1	6	['C']	6	2	3	3	0	[[(1, 'RRS'), (1, 'SSR')]]	[2]	[2]	['racemic']	['C1']	4	1.0	2.0	RAC-1	contains following chiral atom(s)C	NA	7.9574	19.4192	24.2174	90.0	91.406	90.0	3741.0995488	1.37716809771	2(C43 H34 N2 O7),2(C1 H2 Cl2)	bis(11a'-(2-(3,5-Dimethoxyphenylamino)-1-oxoinden-3-yl)-6',6a',11',11a'-tetrahydro-1',3'-dimethoxyspiro(indene-2(3H),6'-5'H-indeno(1,2-c)quinoline)-1,11'-dione) dichloromethane solvate	at 200 K	None	None	dark red	None	None	dichloromethane/hexanes	None	B.Taylor, P.J.Carroll, M.M.Joullie
CAYWUX	RACEMIC	NC_ND_NI	Strict definition of kryptoracemate	KRYPTORACEMIC	NO	P21	4	TRUE	FALSE	6.3	2	1	2	['C']	2	2	1	1	0	[[(1, 'S'), (1, 'R')]]	[2]	[2]	['racemic']	['C1']	2	2.0	4.0	RAC-1	contains following chiral atom(s)C	NA	8.9279	22.4318	11.827	90.0	96.959	90.0	2351.13081415	1.25859882869	C30 H23 N1 O3	2-[1-(1-methyl-1H-indol-3-yl)-2-oxo-2-phenylethyl]phenyl benzoate	296 K	None	None	colorless	None	None	None	None	Yi-Ru Chen, G.M.Reddy, Shao-Hao Hong, Ying-Zheng Wang, Jhen-Kuei Yu, Wenwei Lin
CAYXIM	RACEMIC	NC_D_I	Strict definition of kryptoracemate + achiral molecule	KRYPTORACEMIC	NO	P21	4	TRUE	TRUE	6.65	2	1	2	['C']	2	2	1	1	0	[[(1, 'S'), (1, 'R')]]	[2]	[2]	['racemic']	['C1']	4	2.0	4.0	RAC-1	contains following chiral atom(s)C	NA	11.932	13.891	25.1625	90.0	91.054	90.0	4169.91359647	1.24390212231	C42 H52 N2 O1 P1 1+,C1 F3 O3 S1 1-	[{2-[(benzenecarbonyl)(methyl)amino]phenyl}(1-methyl-2-phenyl-1H-indol-3-yl)methyl](tributyl)phosphanium trifluoromethanesulfonate	200 K	None	None	colorless	None	None	None	Water or solvent maybe included in the crystal unit.	Yi-Ru Chen, G.M.Reddy, Shao-Hao Hong, Ying-Zheng Wang, Jhen-Kuei Yu, Wenwei Lin
CEDLUS	RACEMIC	NC_ND_NI	Strict definition of kryptoracemate	KRYPTORACEMIC	NO	P21	4	TRUE	FALSE	13.9	2	1	4	['C']	4	4	2	2	0	[[(1, 'SS'), (1, 'RR')]]	[2]	[2]	['racemic']	['C1']	2	2.0	4.0	RAC-1	contains following chiral atom(s)C	NA	6.077	20.345	11.396	90.0	100.61	90.0	1384.87358849	1.26300233544	C18 H17 N1 O1	1,5,6,10b-Î±-Tetrahydro-6Î±-phenylpyrrolo(2,1-a)isoquinolin-3(2H)-one	None	None	205-7deg.C	colorless	None	None	None	None	B.E.Maryanoff, D.F.McComsey, B.A.Duhl-Emswiler
CEFXER	RACEMIC	NC_D_I	Contains also at least an other enantiomer in enantiopure proportion + achiral molecule	KRYPTORACEMIC	NO	P212121	19	TRUE	TRUE	6.89	4	2	6	['C']	6	6	5	1	0	[[(2, 'RR')], [(1, 'S'), (1, 'R')]]	[1, 2]	[2, 2]	['chiral', 'racemic']	['C2', 'C1']	8	2.0	8.0	RAC-1	contains following chiral atom(s)C	NA	9.5777	27.1971	28.9068	90.0	90.0	90.0	7529.80701148	1.21528809933	C14 H18 N2 2+,C22 H12 O4 2-,C7 H16 O1,H2 O1	(1R,2R)-Diphenylethylenediammonium (aS)-1,1'-binaphthyl-2,2'-dicarboxylate 2-heptanol solvate monohydrate	at 100 K	None	None	colorless	None	None	None	None	Y.Imai, M.Takeshita, T.Sato, R.Kuroda
CEHYEW	RACEMIC	NC_ND_NI	Strict definition of kryptoracemate	KRYPTORACEMIC	NO	P1	1	TRUE	FALSE	4.53	4	1	4	['C']	4	4	2	2	0	[[(2, 'S'), (2, 'R')]]	[2]	[4]	['racemic']	['C1']	4	4.0	4.0	RAC-2	contains following chiral atom(s)C	NA	10.118	10.99	18.549	88.854	81.932	88.667	2041.33022824	1.31631875051	C24 H20 O2 S2	3-benzyl-5-(benzylsulfanyl)-6-phenyl-1,4-oxathiin-2(3H)-one	173.2 K	None	None	colorless	None	None	None	None	Tong Wang, Zhong-hua Gao, Song Ye
CENKUD	RACEMIC	NC_ND_I	Contains also at least an other enantiomer in enantiopure proportion + achiral molecule	KRYPTORACEMIC	NO	P21212	18	TRUE	FALSE	3.94	4	2	16	['C' 'N']	14	14	5	11	0	[[(1, 'S'), (1, 'R')], [(2, 'SRSSSSR')]]	[2, 1]	[2, 2]	['racemic', 'chiral']	['C1']	5	2.0	8.0	Wa-could be Diast	contains following chiral atom(s)C,N	NA	13.994	32.022	13.811	90.0	90.0	90.0	6188.92825295	1.49278773306	C23 H27 N2 O4 1+,C10 H8 N3 O8 1-,0.05(H2 O1)	2,3-Dimethoxy-10-oxostrychnidin-19-ium 2-((3,5-dinitrobenzoyl)amino)-3-hydroxypropanoate hydrate	at 100 K	None	above 463 K	yellow	None	None	None	None	A.Bialonska, Z.Ciunik
CENLIS	RACEMIC	NC_D_I	Contains also at least an other enantiomer in enantiopure proportion + achiral molecule	KRYPTORACEMIC	NO	P21	4	TRUE	TRUE	6.74	4	2	16	['C' 'N']	14	14	5	11	0	[[(1, 'S'), (1, 'R')], [(2, 'SRSSSSR')]]	[2, 1]	[2, 2]	['racemic', 'chiral']	['C1']	12	2.0	4.0	Wa-could be Diast	contains following chiral atom(s)C,N	NA	8.49	12.588	32.933	90.0	94.56	90.0	3508.47861214	2.3154744252	C23 H27 N2 O4 1+,C10 H8 N3 O7 1-,2.875(H2 O1)	2,3-Dimethoxy-10-oxostrychnidin-19-ium 2-((3,5-dinitrobenzoyl)amino)propanoate hydrate	at 100 K	None	415 K	orange	None	None	None	None	A.Bialonska, Z.Ciunik
CEPGOW	RACEMIC	NC_ND_NI	Strict definition of kryptoracemate	KRYPTORACEMIC	NO	P21	4	TRUE	FALSE	5.79	2	1	6	['C']	6	0	3	3	0	[[(1, 'RRS'), (1, 'SSR')]]	[2]	[2]	['racemic']	['C1']	2	2.0	4.0	RAC-1	contains following chiral atom(s)C	NA	8.851	10.081	28.437	90.0	91.989	90.0	2535.81750813	1.30850569656	C29 H29 N3 O5	ethyl 6'-hydroxy-1,1'',5,7-tetramethyl-2,2''-dioxo-1,1'',2,2'',6',7'-hexahydrodispiro[indole-3,5'-indolizine-8',3''-indole]-6'-carboxylate	293 K	None	None	colorless	None	None	dichloromethane/hexane	None	Nai-Kai Li, Wei-Tai Fan, Jun-Qi Zhang, Bing-Bing Sun, Jun-Bo Chen, Xing-Wang Wang
CEVQIG	RACEMIC	NC_ND_NI	Strict definition of kryptoracemate	KRYPTORACEMIC	NO	P21	4	TRUE	FALSE	4.27	2	1	6	['C']	6	4	3	3	0	[[(1, 'RRS'), (1, 'SSR')]]	[2]	[2]	['racemic']	['C1']	2	2.0	4.0	RAC-1	contains following chiral atom(s)C	NA	8.6912	27.8849	11.428	90.0	94.876	90.0	2759.58959784	1.37704574031	C32 H30 Cl1 N3 O3 S1	9-[(4-chlorophenyl)methyl]-13b-methyl-8-[(4-methylphenyl)sulfonyl]-5,8,8a,9,13b,14a-hexahydro-6H-indolo[2',3':5,6][1,3,4]oxadiazino[2,3-a]isoquinoline	100 K	None	None	colorless	None	None	None	None	Lemao Yu, Yuan Zhong, Jicong Yu, Lu Gan, Zhengjun Cai, Rui Wang, Xianxing Jiang
CEVQOM	RACEMIC	NC_ND_NI	Strict definition of kryptoracemate	KRYPTORACEMIC	NO	P21	4	TRUE	FALSE	3.28	2	1	6	['C']	6	4	3	3	0	[[(1, 'RRS'), (1, 'SSR')]]	[2]	[2]	['racemic']	['C1']	2	2.0	4.0	RAC-1	contains following chiral atom(s)C	NA	9.27904	18.37857	16.77742	90.0	104.2756	90.0	2772.79568063	1.331070704	C32 H30 F1 N3 O3 S1	9-benzyl-4-fluoro-13b-methyl-8-[(4-methylphenyl)sulfonyl]-5,8,8a,9,13b,14a-hexahydro-6H-indolo[2',3':5,6][1,3,4]oxadiazino[2,3-a]isoquinoline	100 K	None	None	colorless	None	None	None	None	Lemao Yu, Yuan Zhong, Jicong Yu, Lu Gan, Zhengjun Cai, Rui Wang, Xianxing Jiang
CEZQOO	RACEMIC	NC_ND_NI	Strict definition of kryptoracemate	KRYPTORACEMIC	NO	P21	4	TRUE	FALSE	4.93	2	1	4	['C']	4	4	2	2	0	[[(1, 'SS'), (1, 'RR')]]	[2]	[2]	['racemic']	['C1']	2	2.0	4.0	RAC-1	contains following chiral atom(s)C	NA	7.549	21.693	10.004	90.0	95.96	90.0	1629.4042086	1.13885431763	C19 H21 N1 O1	(2RS,3RS)-anti-3-Hydroxy-2-(p-tolyl)-3-(mesityl)propanenitrile	at 293 K	None	None	colorless	None	None	None	None	P.R.Carlier, Yiqun Zhang, C.Slebodnick, M.M.-C.Lo, I.D.Williams
CILCAD	RACEMIC	NC_ND_NI	Strict definition of kryptoracemate	KRYPTORACEMIC	NO	P21	4	TRUE	FALSE	2.84	2	1	2	['C']	2	0	1	1	0	[[(1, 'S'), (1, 'R')]]	[2]	[2]	['racemic']	['C1']	2	2.0	4.0	RAC-1	contains following chiral atom(s)C	NA	8.7814	17.107	9.975	90.0	99.598	90.0	1477.50259745	1.53388058685	C17 H13 Br1 N2 O1	3-(2-Bromobenzyl)-2-oxo-1,2,3,4-tetrahydroquinoline-3-carbonitrile	at 296 K	None	None	colorless	None	None	None	None	Xinying Zhang, Xiaojie Guo, Liangliang Fang, Yunping Song, Xuesen Fan
CIPLEV	RACEMIC	NC_ND_NI	Strict definition of kryptoracemate	KRYPTORACEMIC	NO	P21	4	TRUE	FALSE	3.94	2	1	10	['C']	10	6	5	5	0	[[(1, 'SRSSR'), (1, 'RSRRS')]]	[2]	[2]	['racemic']	['C1']	2	2.0	4.0	RAC-1	contains following chiral atom(s)C	NA	14.1379	8.2041	16.3612	90.0	91.428	90.0	1897.12568883	1.3564468406	C24 H21 N1 O4	3-methoxy-13,15-dimethyl-13,14-dihydro-12H-6b,12-(epoxymethano)[1]benzofuro[3',2':4a,10]anthra[9,1-cd][1,2]oxazole	169 K	None	None	colorless	None	None	Re-crystallisation from solvent: dichloromethane, hexane	None	Yu.Yamashita, Y.Hirano, A.Takada, H.Takikawa, K.Suzuki
CIXHOG	RACEMIC	NC_ND_NI	Strict definition of kryptoracemate	KRYPTORACEMIC	NO	P21	4	TRUE	FALSE	6.65	2	1	4	['C']	4	2	2	2	0	[[(1, 'SS'), (1, 'RR')]]	[2]	[2]	['racemic']	['C1']	2	2.0	4.0	RAC-1	contains following chiral atom(s)C	NA	5.972	28.383	11.674	90.0	97.59	90.0	1961.44436636	1.26126162285	C22 H28 O5	(2R*,3R*)-5-(1,3-Dioxolan-2-yl)-2,3-bis(4-methoxyphenyl)pentan-2-ol	at 203 K	None	None	colorless	None	None	None	None	K.Krohn, U.Florke, U.Hofker, M.Traubel
COCROD	RACEMIC	NC_ND_NI	Strict definition of kryptoracemate	KRYPTORACEMIC	NO	P21	4	TRUE	FALSE	6.0	2	1	6	['C']	6	6	3	3	0	[[(1, 'SRR'), (1, 'RSS')]]	[2]	[2]	['racemic']	['C1']	2	2.0	4.0	RAC-1	contains following chiral atom(s)C	NA	6.0446	8.7655	21.465	90.0	92.582	90.0	1136.14568055	1.38682980619	C10 H14 F3 N1 O2	t-butyl 5-(trifluoromethyl)-2-azabicyclo[2.1.0]pentane-2-carboxylate	at 120 K	None	None	None	None	None	None	None	O.S.Artamonov, Evgeniy Y.Slobodyanyuk, D.M.Volochnyuk, I.V.Komarov, A.A.Tolmachev, P.K.Mykhailiuk
COCXEA	RACEMIC	NC_ND_NI	Strict definition of kryptoracemate	KRYPTORACEMIC	NO	P212121	19	TRUE	FALSE	7.38	2	1	2	['P']	0	0	1	1	0	[[(1, 'S'), (1, 'R')]]	[2]	[2]	['racemic']	['C1']	2	2.0	8.0	RAC-1	contains following chiral atom(s)P	NA	8.4621	19.7458	21.2129	90.0	90.0	90.0	3544.48327767	1.36177691852	C21 H18 N1 O3 P1	3-(4-methoxyphenyl)-2-phenoxy-1,2-dihydro-1,2Î»5-benzazaphosphinin-2-one	173 K	None	None	colorless	None	None	None	None	J.P.Bard, Chun-Lin Deng, H.C.Richardson, J.M.Odulio, J.E.Barker, L.N.Zakharov, P.H.-Y Cheong, D.W.Johnson, M.M.Haley
COGNOC	RACEMIC	NC_ND_NI	Strict definition of kryptoracemate	KRYPTORACEMIC	NO	P212121	19	TRUE	FALSE	4.5	2	1	6	['C']	6	4	3	3	0	[[(1, 'RRS'), (1, 'SSR')]]	[2]	[2]	['racemic']	['C1']	2	2.0	8.0	RAC-1	contains following chiral atom(s)C	NA	10.781	15.053	18.434	90.0	90.0	90.0	2991.58736856	1.50177722642	C15 H16 Br1 N1 O3	(8-Bromo-7-hydroxy-3'-methyl-3,4,4',5'-tetrahydro-3'H-spiro(chromene-2,2'-furan)-4'-yl)acetonitrile	at 293 K	None	124-126 deg.C	colorless	None	None	dichloromethane/methanol	None	Yaodong Huang, T.R.R.Pettus
COMCIS	RACEMIC	NC_ND_NI	Strict definition of kryptoracemate + achiral molecule	KRYPTORACEMIC	NO	P21	4	TRUE	FALSE	10.87	2	1	2	['C']	2	2	1	1	0	[[(1, 'S'), (1, 'R')]]	[2]	[2]	['racemic']	['C1']	4	2.0	4.0	RAC-1	contains following chiral atom(s)C	NA	5.8687	10.7289	27.8199	90.0	95.947	90.0	1742.24431668	1.8346749626	C19 H14 I1 N1 O5,H2 O1	methyl 2-(3-(iodo(phenyl)methylene)-6-nitro-1,3-dihydro-2-benzofuran-1-yl)acrylate monohydrate	at 200 K	None	None	yellow	None	None	None	None	D.Janreddy, V.Kavala, T.Kotipalli, R.R.Rajawinslin, Chun-Wei Kuo, Wen-Chang Huang, Ching-Fa Yao
CORKOM	SCALEMIC	NC_ND_NI	Unbalanced Kryptoracemate	KRYPTORACEMIC	NO	P1	1	TRUE	FALSE	5.89	3	1	3	['C']	3	3	2	1	0	[[(1, 'S'), (2, 'R')]]	[2]	[3]	['scalemic']	['C1']	3	3.0	3.0	scal-3-attention could contain stereoisomer	contains following chiral atom(s)C	NA	7.2073	15.8405	16.0165	113.048	97.125	95.401	1649.09352009	1.35196325954	C25 H25 N3 O3 S1	1,5-dimethyl-4-{1-[(naphthalen-2-yl)sulfonyl]pyrrolidin-2-yl}-2-phenyl-1,2-dihydro-3H-pyrazol-3-one	296 K	None	None	colorless	None	None	None	None	A.V.Smolobochkin, T.S.Rizbayeva, A.S.Gazizov, J.K.Voronina, A.B.Dobrynin, A.V.Gildebrant, A.G.Strelnik, I.S.Sazykin, A.R.Burilov, M.A.Pudovik, M.A.Sazykina
COVXOC	RACEMIC	NC_ND_NI	Strict definition of kryptoracemate	KRYPTORACEMIC	NO	P21	4	TRUE	FALSE	3.3	2	1	4	['C']	4	4	2	2	0	[[(1, 'SR'), (1, 'RS')]]	[2]	[2]	['racemic']	['C1']	2	2.0	4.0	RAC-1	contains following chiral atom(s)C	NA	13.0848	13.5713	16.2698	90.0	94.205	90.0	2881.37704954	1.31572053694	C30 H38 N2 O5 S2	N-(phenylsulfonyl)-N-(1-phenyl-1-((2,2,6,6-tetramethylpiperidin-1-yl)oxy)propan-2-yl)benzenesulfonamide	at 100 K	None	None	colorless	None	None	None	None	Yi Li, M.Hartmann, C.G.Daniliuc, A.Studer
COWMOQ	RACEMIC	NC_ND_NI	Strict definition of kryptoracemate	KRYPTORACEMIC	NO	P212121	19	TRUE	FALSE	6.2	2	1	8	['C']	8	4	4	4	0	[[(1, 'SRSR'), (1, 'RSRS')]]	[2]	[2]	['racemic']	['C1']	2	2.0	8.0	RAC-1	contains following chiral atom(s)C	NA	7.124	16.45	28.17	90.0	90.0	90.0	3301.236666	1.41835030996	C20 H16 O2 S2	syn-12,13-Dimethyl-5,6,12,13-tetrahydro-5,13:6,12-bis(epithio)-dibenzo(a,e)cyclodecene-11,14-dione	None	None	207-209deg.C	None	None	None	None	None	O.H.Johansen, P.Groth, K.Undheim
CUKDAN10	RACEMIC	NC_ND_NI	Strict definition of kryptoracemate	KRYPTORACEMIC	NO	P1	1	TRUE	FALSE	4.0	2	1	4	['C']	4	0	2	2	0	[[(1, 'SR'), (1, 'RS')]]	[2]	[2]	['racemic']	['C1']	2	2.0	2.0	RAC-1	contains following chiral atom(s)C	NA	8.91	13.703	6.252	93.18	80.29	102.92	733.221008273	1.16119015593	C15 H16 N2 S1	2-t-Butylthio-1,2-dicyano-1-phenyl-cyclopropane	None	None	None	colorless	None	None	None	Published bond lengths are mean values for the two independent molecules	B.Tinant, San Wu, J.P.Declercq, M.van Meerssche, A.De Mesmaeker, W.Masamba, R.Merenyi, H.G.Viehe
CUMZIU	RACEMIC	NC_ND_NI	Strict definition of kryptoracemate	KRYPTORACEMIC	NO	P43212	96	TRUE	FALSE	7.64	2	1	10	['C']	10	10	5	5	0	[[(1, 'RRSRR'), (1, 'SSRSS')]]	[2]	[2]	['racemic']	['C1']	2	2.0	16.0	RAC-1	contains following chiral atom(s)C	NA	11.327	11.327	41.426	90.0	90.0	90.0	5314.99428475	1.16152331201	C16 H24 O1	1-(Tricyclo[5.2.1.02,6]dec-4-en-3-yl)cyclohexanol	at 100 K	None	None	colorless	None	None	None	None	O.Jacquet, T.Bergholz, C.Magnier-Bouvier, M.Mellah, R.Guillot, J.-C.Fiaud
CUTGAZ	RACEMIC	NC_ND_NI	Strict definition of kryptoracemate	KRYPTORACEMIC	NO	P21	4	TRUE	FALSE	4.21	2	1	4	['C']	4	2	2	2	0	[[(1, 'SS'), (1, 'RR')]]	[2]	[2]	['racemic']	['C1']	2	2.0	4.0	RAC-1	contains following chiral atom(s)C	NA	10.345	10.538	11.747	90.0	90.97	90.0	1280.42285486	1.36028167667	C12 H13 F3 O3	syn-3,3,3-Trifluoro-1,2-dihydroxypropio-4'-methylphenone	at 233.2 K	None	None	colorless	None	None	n-hexane/dichloromethane	None	A.Ishii, J.Kojima, K.Mikami
DACTOT	RACEMIC	NC_ND_NI	Strict definition of kryptoracemate	KRYPTORACEMIC	NO	P1	1	TRUE	FALSE	8.27	2	1	10	['C']	10	8	5	5	0	[[(1, 'RRSSS'), (1, 'SSRRR')]]	[2]	[2]	['racemic']	['C1']	2	2.0	2.0	RAC-1	contains following chiral atom(s)C	NA	7.342	8.552	11.109	92.622	102.384	102.591	661.768814521	1.29139091196	C16 H19 N1 O2	(3R*,6R*,7S*,8S*,9R*)-3,7,9,14-tetramethyl-4-oxa-2-azatetracyclo[8.4.0.02,6.03,8]tetradeca-1(14),10,12-trien-5-one	120 K	None	None	colorless	None	None	None	None	G.G.Bizhanova, K.Yu.Suponitsky, Y.V.Vakhitova, R.R.Gataullin
DAGTAH	RACEMIC	NC_ND_NI	Strict definition of kryptoracemate	KRYPTORACEMIC	NO	P21	4	TRUE	FALSE	6.92	2	1	4	['C']	4	4	2	2	0	[[(1, 'SS'), (1, 'RR')]]	[2]	[2]	['racemic']	['C1']	2	2.0	4.0	RAC-1	contains following chiral atom(s)C	NA	9.717	10.789	18.67	90.0	91.73	90.0	1956.40927394	1.13198873801	C19 H27 N1 O4	N-Phenylacetyl-trans-(RS)-1-aminocyclohexane-2-carboxylate t-butyl peroxyester	at 293 K	None	None	colorless	None	None	None	None	F.Formaggio, M.Crisma, L.Scipionato, S.Antonello, F.Maran, C.Toniolo
DAGXUH	RACEMIC	NC_ND_NI	Strict definition of kryptoracemate	KRYPTORACEMIC	NO	P1	1	TRUE	FALSE	3.03	2	1	2	['C']	2	2	1	1	0	[[(1, 'S'), (1, 'R')]]	[2]	[2]	['racemic']	['C1']	2	2.0	2.0	RAC-1	contains following chiral atom(s)C	NA	7.5076	7.9269	13.2339	94.761	94.576	98.12	773.64027637	1.49912225225	C17 H17 Br1 O3	ethyl 5-acetyl-4-(4-bromophenyl)-2-methylcyclopenta-1,3-diene-1-carboxylate	150 K	None	None	colorless	None	None	None	None	Mei-Huey Lin, Yu-Chun Chen, Shih-Hao Chiu, Kung-Yu Liang, Yi-Lin Lee, Tsung-Hsun Chuang
DAJKAC	RACEMIC	NC_ND_NI	Strict definition of kryptoracemate	KRYPTORACEMIC	NO	P212121	19	TRUE	FALSE	4.95	2	1	2	['C']	2	2	1	1	0	[[(1, 'S'), (1, 'R')]]	[2]	[2]	['racemic']	['C1']	2	2.0	8.0	RAC-1	contains following chiral atom(s)C	NA	5.8253	12.737	31.224	90.0	90.0	90.0	2316.72232263	1.28024775413	C15 H13 N1 O1	2-Methyl-3-phenylisoindolin-1-one	at 100 K	None	None	colorless	None	None	None	None	D.Augner, D.C.Gerbino, N.Slavov, J.-M.Neudorfl, H.-G.Schmalz
DAKDOL	RACEMIC	NC_ND_NI	Strict definition of kryptoracemate + achiral molecule	KRYPTORACEMIC	NO	P21	4	TRUE	FALSE	7.61	2	1	4	['C']	4	0	2	2	0	[[(1, 'SS'), (1, 'RR')]]	[2]	[2]	['racemic']	['C1']	5	2.0	4.0	RAC-1	contains following chiral atom(s)C	NA	9.374	35.9	12.405	90.0	93.387	90.0	4167.32050381	1.4214948049	C46 H36 N2 O6,1.5(C1 H1 Cl3)	2',3',6',7',14',15',18',19'-octahydro-1'H,3H,3''H,5'H,13'H,17'H-dispiro[2-benzofuran-1,9'-pyrido[3,2,1-ij]quinolizino[1'',9'':6',7',8']chromeno[3',2':6,7]chromeno[2,3-f]quinoline-11',1''-[2]benzofuran]-3,3''-dione chloroform solvate	100 K	None	None	red	None	None	None	None	M.Tanioka, S.Kamino, A.Muranaka, Y.Shirasaki, Y.Ooyama, M.Ueda, M.Uchiyama, S.Enomoto, D.Sawada
DAQFEI	RACEMIC	NC_ND_NI	Strict definition of kryptoracemate	KRYPTORACEMIC	NO	P21	4	TRUE	FALSE	6.17	2	1	4	['P']	0	0	2	2	0	[[(1, 'SS'), (1, 'RR')]]	[2]	[2]	['racemic']	['C2']	2	2.0	4.0	RAC-1	contains following chiral atom(s)P	NA	9.0916	26.778	10.3509	90.0	106.329	90.0	2418.32892876	1.20868689329	C26 H28 B2 O1 P2	rac-Dibenzo[b,d]furan-4,6-diylbis(Î»5-boranyl(methyl)phenylphosphorane)	at 173 K	None	None	colorless	None	None	None	None	Hongsui Sun, J.S.Ritch, P.G.Hayes
DAQKAI	RACEMIC	NC_ND_NI	Strict definition of kryptoracemate	KRYPTORACEMIC	NO	P21	4	TRUE	FALSE	5.75	2	1	4	['C']	4	4	2	2	0	[[(1, 'SS'), (1, 'RR')]]	[2]	[2]	['racemic']	['C1']	2	2.0	4.0	RAC-1	contains following chiral atom(s)C	NA	8.029	25.916	14.222	90.0	101.147	90.0	2903.47846774	1.29620595316	C30 H30 N8 O4	7,7'-bis(4-Methoxyphenyl)-1,1',3,3'-tetramethyl-5,5',8,8'-tetrahydro-8,8'-bipyrazolo(4,3-d)(1,2)diazepine-4,4'(1H,1'H)-dione	at 293 K	None	350-350.5deg.C	colorless	None	None	ethanol	None	S.F.Vasilevsky, E.V.Mshvidobadze, V.I.Mamatyuk, G.V.Romanenko, J.Elguero
DAQSUJ	RACEMIC	NC_ND_NI	Strict definition of kryptoracemate	KRYPTORACEMIC	NO	P21	4	TRUE	FALSE	4.31	2	1	4	['C']	4	4	2	2	0	[[(1, 'SS'), (1, 'RR')]]	[2]	[2]	['racemic']	['C1']	2	2.0	4.0	RAC-1	contains following chiral atom(s)C	NA	5.1056	15.759	13.849	90.0	90.25	90.0	1114.26816676	1.31888244821	C12 H15 N1 O3	(2R,3R)-3-Hydroxy-2-(n-propyl)-2,3-dihydro-5H-1,5-benzoxazepin-4-one	at 200 K	None	137-138deg.C	white	None	None	hexane/ethyl acetate	D.A.Clemente (Tetrahedron 59 (2003) 8445-8455) has examined the possibility of higher symmetry	K.Woydowski, J.Liebscher
DASHAJ	RACEMIC	NC_ND_NI	Strict definition of kryptoracemate	KRYPTORACEMIC	NO	P212121	19	TRUE	FALSE	5.28	2	1	10	['C']	10	8	5	5	0	[[(1, 'SSSSS'), (1, 'RRRRR')]]	[2]	[2]	['racemic']	['C1']	2	2.0	8.0	RAC-1	contains following chiral atom(s)C	NA	8.7569	21.8595	22.0925	90.0	90.0	90.0	4228.97850674	1.21094528327	C26 H27 N1 O2	2,7a-dimethyl-4-phenyl-7-(2-phenylethyl)-3a,4,6,7,7a,7b-hexahydro-1H-cyclobuta[e]isoindole-1,3(2H)-dione	100 K	None	None	colorless	None	None	None	None	A.N.Baumann, M.Eisold, D.Didier
DATPAQ01	RACEMIC	NC_ND_NI	Strict definition of kryptoracemate	KRYPTORACEMIC	NO	P21	4	TRUE	FALSE	6.64	2	1	12	['C']	12	12	6	6	0	[[(1, 'RSRRSR'), (1, 'SRSSRS')]]	[2]	[2]	['racemic']	['C2']	2	2.0	4.0	RAC-1	contains following chiral atom(s)C	NA	10.1655	18.1219	10.77	90.0	113.2376	90.0	1823.07853925	2.33793270043	C12 H18 Br6	(1RS,2RS,5SR,6RS,9RS,10SR)-1,2,5,6,9,10-Hexabromocyclododecane	at 298 K	None	None	colorless	None	None	dichloromethane/hexane	None	N.V.Heeb, W.B.Schweizer, M.Kohler, A.C.Gerecke
DEFQEK	RACEMIC	NC_ND_NI	Strict definition of kryptoracemate	KRYPTORACEMIC	NO	P212121	19	TRUE	FALSE	8.66	2	1	2	['C']	2	2	1	1	0	[[(1, 'S'), (1, 'R')]]	[2]	[2]	['racemic']	['C1']	2	2.0	8.0	RAC-1	contains following chiral atom(s)C	NA	10.777	11.649	36.528	90.0	90.0	90.0	4585.77162014	1.17164901898	C21 H28 N2 O6	(Z)-(R)-3-t-Butoxycarbonyl-2,2-dimethyl-4-(2'-benzamido-2'-(methoxycarbonyl)ethenyl)-1,3-oxazolidine	None	None	None	None	None	None	None	None	A.Avenoza, C.Cativiela, J.M.Peregrina, M.M.Zurbano
DEKYOJ	RACEMIC	NC_ND_I	Strict definition of kryptoracemate + achiral molecule	KRYPTORACEMIC	NO	P21	4	TRUE	FALSE	5.01	2	1	2	['C']	2	2	1	1	0	[[(1, 'S'), (1, 'R')]]	[2]	[2]	['racemic']	['C1']	5	1.0	2.0	RAC-1	contains following chiral atom(s)C	NA	6.208	9.974	11.84	90.0	101.39	90.0	718.677889068	1.65577417245	2(C3 H8 N1 O2 1+),F6 Si1 2-,2(H2 O1)	bis(DL-Alaninium) hexafluorosilicate dihydrate	at 296 K	None	None	colorless	None	None	None	None	V.V.Ghazaryan, M.Fleck, A.M.Petrosyan
DEMNIV	RACEMIC	NC_ND_NI	Strict definition of kryptoracemate	KRYPTORACEMIC	NO	P21	4	TRUE	FALSE	4.68	2	1	8	['C']	8	8	4	4	0	[[(1, 'RRSR'), (1, 'SSRS')]]	[2]	[2]	['racemic']	['C1']	2	2.0	4.0	RAC-1	contains following chiral atom(s)C	NA	5.8407	22.3977	10.7014	90.0	97.123	90.0	1389.13399504	1.26404272404	C19 H20 O1	4-phenyl-2,3,4,4a,9,9a-hexahydro-1H-fluoren-3-ol	100 K	None	None	white	None	None	None	None	Lin Deng, Likun Jin, Guangbin Dong
DEWVEJ	RACEMIC	NC_ND_NI	Strict definition of kryptoracemate	KRYPTORACEMIC	NO	P21	4	TRUE	FALSE	5.01	2	1	4	['C']	4	2	2	2	0	[[(1, 'SS'), (1, 'RR')]]	[2]	[2]	['racemic']	['C1']	2	2.0	4.0	RAC-1	contains following chiral atom(s)C	NA	14.792	6.5197	15.949	90.0	102.573	90.0	1501.22725824	1.23152970096	C19 H18 O2	2,2-dimethyl-4'-phenyl-2H,2'H-spiro[1-benzofuran-3,1'-cyclobutan]-2'-one	290.6 K	None	None	light yellow	None	None	None	None	Meiling Xiao, Fuming Zhang, Zhe Du, Baochun Ma
DICREN	RACEMIC	NC_ND_NI	Strict definition of kryptoracemate	KRYPTORACEMIC	NO	P1	1	TRUE	FALSE	8.89	2	1	2	['C']	2	0	1	1	0	[[(1, 'S'), (1, 'R')]]	[2]	[2]	['racemic']	['C1']	2	2.0	2.0	RAC-1	contains following chiral atom(s)C	NA	9.1937	11.5288	12.5921	87.648	80.507	71.088	1245.21652788	1.19884583929	C21 H31 N5 O6	t-Butyl 1-(t-butoxycarbonylhydrazino)-2-(4-nitrophenylhydrazono)cyclopentane-1-carboxylate	at 293 K	None	None	colorless	None	None	None	None	J.Comelles, A.Pericas, M.Moreno-Maas, A.Vallribera, G.Drudis-Sol, A.Lledos, T.Parella, A.Roglans, S.Garcia-Granda, L.Roces-Fernandez
DIELDR	SCALEMIC	NC_ND_NI	Unbalanced Kryptoracemate	KRYPTORACEMIC	NO	P212121	19	TRUE	FALSE	15.6	3	1	24	['C']	24	18	12	12	0	[[(1, 'RRSRRSSS'), (2, 'SSRSSRRR')]]	[2]	[3]	['scalemic']	['C3']	3	3.0	12.0	scal-3-attention could contain stereoisomer	contains following chiral atom(s)C	NA	38.412	14.124	8.098	90.0	90.0	90.0	4393.41675062	1.72762343625	C12 H8 Cl6 O1	1,2,3,4,10,10-Hexachloro-6,7-exo-epoxy-1,4,4a,5,6,7,8,8a-octahydro-endo-exo-1,4.5,8-dimethanonaphthalene	None	None	None	None	None	None	None	None	M.E.Gress, R.A.Jacobson
DIGMOX	RACEMIC	NC_ND_NI	Strict definition of kryptoracemate	KRYPTORACEMIC	NO	P212121	19	TRUE	FALSE	5.75	2	1	2	['C']	2	0	1	1	0	[[(1, 'S'), (1, 'R')]]	[2]	[2]	['racemic']	['C1']	2	2.0	8.0	RAC-1	contains following chiral atom(s)C	NA	11.284	14.658	27.222	90.0	90.0	90.0	4502.54253758	1.19656644674	C24 H27 N1 O3 Si1	5-(4-((t-Butyl(dimethyl)silyl)oxy)phenyl)-4-hydroxy-3H-spiro[cyclopent-4-ene-1,3'-indol]-3-one	at 173 K	None	None	colorless	None	None	None	None	Hongzhi Yang, Juan Feng, Yefeng Tang
DIGPEQ	RACEMIC	NC_ND_NI	Strict definition of kryptoracemate + achiral molecule	KRYPTORACEMIC	NO	P21	4	TRUE	FALSE	4.41	2	1	4	['C']	4	4	2	2	0	[[(1, 'SR'), (1, 'RS')]]	[2]	[2]	['racemic']	['C1']	4	2.0	4.0	RAC-1	contains following chiral atom(s)C	NA	9.8068	39.033	11.3592	90.0	115.302	90.0	3931.04410558	1.16422100989	C39 H56 N4 O1,C7 H8	2-((2,6-Diisopropylphenoxy)(3-(2,6-diisopropylphenyl)-1,3-diazabicyclo[3.3.1]non-2-ylidene)methyl)-1,3-diazabicyclo[3.3.1]non-2-ene toluene solvate	at 100 K	None	None	colorless	None	None	None	None	D.Martin, C.E.Moore, A.L.Rheingold, G.Bertrand
DIPNIC	RACEMIC	NC_ND_NI	Strict definition of kryptoracemate	KRYPTORACEMIC	NO	P21	4	TRUE	FALSE	5.99	2	1	8	['C']	8	6	4	4	0	[[(1, 'SSSS'), (1, 'RRRR')]]	[2]	[2]	['racemic']	['C1']	2	2.0	4.0	RAC-1	contains following chiral atom(s)C	NA	12.2314	7.6263	20.823	90.0	90.121	90.0	1942.37189315	1.29068197536	C22 H23 N3 O3	4,10-dimethyl-7-nitro-2,6-diphenyl-2,3-diazaspiro[4.5]dec-3-en-1-one	100 K	None	None	white	None	None	None	None	K.Shukla, S.Shah, N.K.Rana, V.K.Singh
DIXPUW	RACEMIC	NC_ND_NI	Strict definition of kryptoracemate	KRYPTORACEMIC	NO	P21	4	TRUE	FALSE	7.79	2	1	2	['C']	2	0	1	1	0	[[(1, 'S'), (1, 'R')]]	[2]	[2]	['racemic']	['C1']	2	2.0	4.0	RAC-1	contains following chiral atom(s)C	NA	14.14	7.351	15.864	90.0	108.117	90.0	1567.2046232	1.30241669347	C17 H13 N3 O3	4-Azido-5-(biphenyl-4-yl)-5-hydroxy-3-methyl-2-oxo-2,5-dihydrofuran	at 293 K	None	214deg.C	colorless	None	None	None	None	T.Patonay, J.Jeko, E.Juhasz-Toth
DIXREI	RACEMIC	NC_ND_NI	Strict definition of kryptoracemate	KRYPTORACEMIC	NO	P212121	19	TRUE	FALSE	5.93	2	1	6	['C']	6	6	3	3	0	[[(1, 'SRR'), (1, 'RSS')]]	[2]	[2]	['racemic']	['C1']	2	2.0	8.0	RAC-1	contains following chiral atom(s)C	NA	10.1722	10.3637	35.0599	90.0	90.0	90.0	3696.07177549	1.37799394453	C20 H21 N3 O5	Dimethyl 1-methyl-4-hydroxy-2,6-bis(2-pyridyl)cyclohex-3-ene-3,5-dicarboxylate	at 150 K	None	121-123deg.C	colorless	None	None	methanol	None	N.A.Barnes, A.T.Brooker, S.M.Godfrey, P.R.Mallender, R.G.Pritchard, M.Sadler
DIXZAM	RACEMIC	NC_ND_NI	Strict definition of kryptoracemate + achiral molecule	KRYPTORACEMIC	NO	P21	4	TRUE	FALSE	4.58	4	1	8	['C']	8	8	4	4	0	[[(2, 'SS'), (2, 'RR')]]	[2]	[4]	['racemic']	['C1']	5	4.0	8.0	RAC-2	contains following chiral atom(s)C	NA	10.936	39.183	10.936	90.0	100.52	90.0	4607.36570944	1.22262086713	C24 H23 N1 O3 S1,0.25(C4 H10 O1)	3,5-Dibenzyl-2-(4-methoxyphenyl)thiazolidin-4-one-1-oxide diethyl ether solvate	at 293 K	None	None	colorless	None	None	None	None	A.Colombo, J.C.Fernandez, D.Fernandez-Forner, N.de la Figuera, F.Albericio, P.Forns
DIZLOP	RACEMIC	NC_ND_I	Contains also at least an other enantiomer in enantiopure proportion	KRYPTORACEMIC	NO	P1	1	TRUE	FALSE	2.87	4	2	4	['C' 'P']	2	2	1	3	0	[[(2, 'S')], [(1, 'S'), (1, 'R')]]	[1, 2]	[2, 2]	['chiral', 'racemic']	['C1']	4	2.0	2.0	RAC-1	contains following chiral atom(s)P,C	NA	9.6316	10.2372	10.7405	97.58	94.223	108.013	990.930610347	1.24498283454	C10 H14 O1 P1 S1 1-,C8 H16 N1 O2 1+	7-methyl-1,4-dioxa-8-azoniaspiro[4.5]decane t-butyl(phenyl)phosphinothioate	at 150 K	None	None	colorless	None	None	None	None	Van Ha Vu, F.Louafi, N.Girard, R.Marion, T.Roisnel, V.Dorcet, J.-P.Hurvois
DLMSUC01	RACEMIC	NC_ND_NI	Strict definition of kryptoracemate	KRYPTORACEMIC	NO	P21	4	TRUE	FALSE	14.5	2	1	2	['C']	2	2	1	1	0	[[(1, 'S'), (1, 'R')]]	[2]	[2]	['racemic']	['C1']	2	2.0	4.0	RAC-1	contains following chiral atom(s)C	NA	7.54	16.46	5.47	90.0	113.4	90.0	623.038788279	1.40845748571	C5 H8 O4	DL-Methylsuccinic acid	None	None	None	None	monoclinic polymorph II	None	None	Atomic coordinates from a constrained refinement are also given. C3 x 0.533, not 0.553 C3 y -0.009, not 0.009.	Y.Schouwstra
DOBXUQ	RACEMIC	NC_ND_NI	Strict definition of kryptoracemate	KRYPTORACEMIC	NO	P21	4	TRUE	FALSE	7.99	2	1	2	['C']	2	2	1	1	0	[[(1, 'S'), (1, 'R')]]	[2]	[2]	['racemic']	['C1']	2	2.0	4.0	RAC-1	contains following chiral atom(s)C	NA	6.7344	18.9552	15.1244	90.0	90.856	90.0	1930.44291795	1.29879971566	C27 H23 N1 O1	4-(10-phenyl-11H-benzo[b]fluoren-11-yl)morpholine	100 K	None	None	yellow	None	None	None	None	D.M.Lustosa, P.Cieslik, D.Hartmann, T.Bruckhoff, M.Rudolph, F.Rominger, A.Stephen K.Hashmi
DODPAP	RACEMIC	NC_ND_NI	Strict definition of kryptoracemate	KRYPTORACEMIC	NO	P1	1	TRUE	FALSE	7.32	2	1	2	['C']	2	2	1	1	0	[[(1, 'S'), (1, 'R')]]	[2]	[2]	['racemic']	['C1']	2	2.0	2.0	RAC-1	contains following chiral atom(s)C	NA	7.1761	10.402	10.811	97.229	101.48	107.079	741.202436771	1.42188156846	C20 H15 N1 O3	4-nitro-3',4'-dihydro-1,2'-binaphthalen-1'(2'H)-one	at 100 K	None	None	brown	None	None	None	None	Qing-Long Xu, Hongyin Gao, M.Yousufuddin, D.H.Ess, L.Kurti
DOGQUN	RACEMIC	NC_ND_NI	Strict definition of kryptoracemate	KRYPTORACEMIC	NO	P212121	19	TRUE	FALSE	4.22	2	1	4	['C']	4	4	2	2	0	[[(1, 'SS'), (1, 'RR')]]	[2]	[2]	['racemic']	['C1']	2	2.0	8.0	RAC-1	contains following chiral atom(s)C	NA	8.1378	14.7951	27.4098	90.0	90.0	90.0	3300.12799071	1.24131102856	C20 H20 O3	Methyl 4-(5-oxo-2-phenylcyclohexyl)benzoate	153 K	None	None	colorless	None	None	None	None	Zhongxing Huang, Guangbin Dong
DOHVII	RACEMIC	NC_ND_NI	Strict definition of kryptoracemate	KRYPTORACEMIC	NO	P212121	19	TRUE	FALSE	3.04	2	1	4	['C']	4	4	2	2	0	[[(1, 'SR'), (1, 'RS')]]	[2]	[2]	['racemic']	['C1']	2	2.0	8.0	RAC-1	contains following chiral atom(s)C	NA	9.1296	12.2065	15.3955	90.0	90.0	90.0	1715.68163888	1.4651975461	C7 H11 N1 O3 S1	1,4,4a,5,6,8a-hexahydro-2H-3,2,1-benzoxathiazine-2,2-dione	296 K	None	None	colorless	None	None	None	None	Wei Liu, Dayou Zhong, Cheng-Long Yu, Yan Zhang, Di Wu, Ya-Lan Feng, Hengjiang Cong, Xiuqiang Lu, Wen-Bo Liu
DTYROS	RACEMIC	NC_ND_NI	Strict definition of kryptoracemate	KRYPTORACEMIC	NO	P21	4	TRUE	FALSE	4.8	2	1	2	['C']	2	2	1	1	0	[[(1, 'S'), (1, 'R')]]	[2]	[2]	['racemic']	['C1']	2	2.0	4.0	RAC-1	contains following chiral atom(s)C	NA	6.325	26.489	5.367	90.0	98.18	90.0	890.05435017	1.35214150259	C9 H11 N1 O3	DL-2-Hydroxyphenylalanine	None	None	None	None	None	None	None	There is a non-crystallographic centre of symmetry at (0.6610,0.3899, 0.8015) between pairs of enantiomeric molecules. The coordinates are given for only one of the two molecules in the asymmetric unit	A.Mostad, C.Romming, L.Tressum
DUZQOF	RACEMIC	NC_ND_NI	Strict definition of kryptoracemate	KRYPTORACEMIC	NO	P21	4	TRUE	FALSE	11.0	2	1	4	['C']	4	2	2	2	0	[[(1, 'SS'), (1, 'RR')]]	[2]	[2]	['racemic']	['C1']	2	2.0	4.0	RAC-1	contains following chiral atom(s)C	NA	12.765	7.2963	18.4	90.0	103.473	90.0	1666.5637191	1.27689061075	C21 H20 O3	(2R*,3aR*)-methyl 3-methylene-2-(naphthalen-2-yl)-2,3,3a,4,5,6-hexahydrobenzofuran-3a-carboxylate	at 173.1 K	None	106.8-108.3 deg.C	colorless	None	None	None	None	M.Yoshida, M.Higuchi, K.Shishido
EBEWAM	RACEMIC	NC_ND_NI	Strict definition of kryptoracemate	KRYPTORACEMIC	NO	P212121	19	TRUE	FALSE	6.39	2	1	4	['C']	4	2	2	2	0	[[(1, 'SR'), (1, 'RS')]]	[2]	[2]	['racemic']	['C1']	2	2.0	8.0	RAC-1	contains following chiral atom(s)C	NA	5.6649	19.698	20.708	90.0	90.0	90.0	2310.74774174	1.36379677553	C12 H12 F1 N1 O3	5-(1-fluoroethyl)-5-methyl-3-phenyl-1,3-oxazolidine-2,4-dione	293 K	None	None	None	None	None	None	None	Hongmiao Wu, Bin Yang, Lin Zhu, Ronghua Lu, Guigen Li, Hongjian Lu
EBIMAG	RACEMIC	NC_ND_NI	Strict definition of kryptoracemate	KRYPTORACEMIC	NO	P212121	19	TRUE	FALSE	3.59	2	1	2	['C']	2	0	1	1	0	[[(1, 'S'), (1, 'R')]]	[2]	[2]	['racemic']	['C1']	2	2.0	8.0	RAC-1	contains following chiral atom(s)C	NA	8.7061	11.6316	26.4065	90.0	90.0	90.0	2674.07726904	1.27325386934	C18 H12 N2	2-methyl-1-phenyl-1H-indene-1,3-dicarbonitrile	100 K	None	None	colorless	None	None	None	None	J.D.Power, P.Kavanagh, G.McLaughlin, G.Dowling, M.Barry, J.O'Brien, B.Talbot, B.Twamley, S.D.Brandt
EBOHUY	RACEMIC	NC_ND_NI	Strict definition of kryptoracemate	KRYPTORACEMIC	NO	P21	4	TRUE	FALSE	4.24	2	1	2	['C']	2	0	1	1	0	[[(1, 'S'), (1, 'R')]]	[2]	[2]	['racemic']	['C1']	2	2.0	4.0	RAC-1	contains following chiral atom(s)C	NA	13.5925	9.4664	16.2656	90.0	91.052	90.0	2092.57519095	1.2297473784	C21 H25 N1 O6	Dimethyl 6,9-dimethyl-2-(cyclohexylimino)-8-oxo-1-oxaspiro(4.5)deca-3,6,9-triene-3,4-dicarboxylate	at 298 K	None	167-168deg.C	colorless or white	None	None	dichloromethane/hexane	None	V.Nair, A.U.Vinod, J.S.Nair, A.R.Sreekanth, N.P.Rath
ECEQAG	RACEMIC	NC_ND_I	Contains also at least an other enantiomer in enantiopure proportion + achiral molecule	KRYPTORACEMIC	NO	P21	4	TRUE	FALSE	3.82	6	2	8	['C']	8	8	7	1	0	[[(2, 'RR')], [(1, 'S'), (3, 'R')]]	[1, 2]	[2, 4]	['chiral', 'racemic']	['C1']	11	1.0	2.0	RAC-2	contains following chiral atom(s)C	NA	12.7316	18.0107	15.0977	90.0	101.755	90.0	3389.37286277	1.26536827137	2(C18 H12 O8 2-),4(C8 H12 N1 1+),5(H2 O1)	tris((R)-1-Phenylethanaminium) (S)-1-phenylethanaminium bis((2R,3R)-(-)-2,3-bis(benzoyloxy)succinate) pentahydrate	at 173 K	None	None	colorless	None	None	None	None	A.Lemmerer
ECEQEK	RACEMIC	NC_ND_I	Contains also at least an other enantiomer in enantiopure proportion + achiral molecule	KRYPTORACEMIC	NO	P21	4	TRUE	FALSE	6.02	6	2	8	['C']	8	8	6	2	0	[[(2, 'RR')], [(2, 'S'), (2, 'R')]]	[1, 2]	[2, 4]	['chiral', 'racemic']	['C1']	14	2.0	4.0	RAC-2	contains following chiral atom(s)C	NA	13.9615	18.0549	15.1335	90.0	111.397	90.0	3551.82187182	1.25802888352	C18 H12 O8 2-,2(C8 H12 N1 1+),4(H2 O1)	(R)-1-Phenylethanaminium (S)-1-phenylethanaminium (2R,3R)-(-)-2,3-bis(benzoyloxy)succinate tetrahydrate	at 173 K	None	None	colorless	None	None	None	None	A.Lemmerer
ECEQIO	RACEMIC	NC_ND_I	Contains also at least an other enantiomer in enantiopure proportion + achiral molecule	KRYPTORACEMIC	NO	P21	4	TRUE	FALSE	4.62	6	2	8	['C']	8	8	5	3	0	[[(2, 'RR')], [(3, 'S'), (1, 'R')]]	[1, 2]	[2, 4]	['chiral', 'racemic']	['C1']	13	1.0	2.0	RAC-2	contains following chiral atom(s)C	NA	10.3381	25.6109	13.345	90.0	91.504	90.0	3532.11231485	1.26129843139	2(C18 H12 O8 2-),4(C8 H12 N1 1+),C1 H4 O1,6(H2 O1)	(R)-1-Phenylethanaminium tris((S)-1-phenylethanaminium) bis((2R,3R)-(-)-2,3-bis(benzoyloxy)succinate) methanol solvate hexahydrate	at 173 K	None	None	colorless	None	None	None	None	A.Lemmerer
EGURIH	RACEMIC	NC_ND_NI	Strict definition of kryptoracemate	KRYPTORACEMIC	NO	P212121	19	TRUE	FALSE	5.4	2	1	4	['C']	4	4	2	2	0	[[(1, 'SR'), (1, 'RS')]]	[2]	[2]	['racemic']	['C1']	2	2.0	8.0	RAC-1	contains following chiral atom(s)C	NA	8.723	14.435	21.065	90.0	90.0	90.0	2652.43117782	1.54873879315	C12 H11 N3 O7	2-(3,5-Dinitrobenzoylamino)cyclobutane-1-carboxylic acid	at 293 K	None	220-222 deg.C	None	None	None	None	None	D.J.Aitken, C.Gauzy, E.Pereira
EKIKIS	RACEMIC	NC_ND_I	Strict definition of kryptoracemate + achiral molecule	KRYPTORACEMIC	NO	P21212	18	TRUE	FALSE	4.95	2	1	4	['C' 'N']	2	4	2	2	0	[[(1, 'SS'), (1, 'RR')]]	[2]	[2]	['racemic']	['C1']	6	1.0	4.0	RAC-1	contains following chiral atom(s)N,C	NA	12.102	27.71	17.29	90.0	90.0	90.0	5798.1396018	1.44788834776	C16 H27 Br1 N5 O2 1+,C16 H27 Br1 N5 O2 1+,2(C4 H3 O4 1-),2(C4 H4 O4)	(R)-N-(1-Methyl-4-ethylhexahydro-1,4-diazepinium-6-yl)-5-bromo-6-methylamino-2-methoxypyridine-3-carboxamide (R)-N-(1-ethyl-4-methylhexahydro-1,4-diazepinium-6-yl)-5-bromo-6-methylamino-2-methoxypyridine-3-carboxamide bis(hydrogen fumarate) bis(fumaric acid)	at 293 K	None	167-168 deg.C	colorless	None	None	ethanol	None	Y.Hirokawa, I.Fujiwara, K.Suzuki, H.Harada, T.Yoshikawa, N.Yoshida, S.Kato
EKOKOE	RACEMIC	NC_ND_NI	Strict definition of kryptoracemate	KRYPTORACEMIC	NO	P1	1	TRUE	FALSE	2.54	2	1	6	['C']	6	4	3	3	0	[[(1, 'SRR'), (1, 'RSS')]]	[2]	[2]	['racemic']	['C1']	2	2.0	2.0	RAC-1	contains following chiral atom(s)C	NA	8.038	10.391	12.299	100.51	107.29	104.9	909.794552401	1.2062975309	C21 H30 O3	6Î±-Hydroxysugiyl methyl ether	at 293 K	None	171-172 deg.C	colorless	None	None	None	None	Anpai Li, Xuegong She, Jiyong Zhang, Tongxing Wu, Xinfu Pan
ELAMAH	RACEMIC	NC_ND_I	Strict definition of kryptoracemate + achiral molecule	KRYPTORACEMIC	NO	P212121	19	TRUE	FALSE	3.03	2	1	4	['C']	4	4	2	2	0	[[(1, 'SR'), (1, 'RS')]]	[2]	[2]	['racemic']	['C1']	4	1.0	4.0	RAC-1	contains following chiral atom(s)C	NA	12.0782	13.9253	25.328	90.0	90.0	90.0	4259.98112067	1.51125160927	2(C17 H17 F6 N2 O1 1+),C6 H4 F1 O3 S1 1-,Cl1 1-	bis(2-((2,8-bis(trifluoromethyl)quinolin-4-yl)(hydroxy)methyl)piperidinium) chloride 4-fluorobenzenesulfonate	100 K	None	None	colorless	None	None	None	None	M.M.Jotani, J.L.Wardell, E.R.T.Tiekink
ELIJAK	RACEMIC	NC_ND_NI	Strict definition of kryptoracemate	KRYPTORACEMIC	NO	P212121	19	TRUE	FALSE	4.7	2	1	8	['C']	8	6	4	4	0	[[(1, 'SSSS'), (1, 'RRRR')]]	[2]	[2]	['racemic']	['C1']	2	2.0	8.0	RAC-1	contains following chiral atom(s)C	NA	11.8945	19.2698	27.0279	90.0	90.0	90.0	6194.91998405	1.2259532719	C38 H37 N1 O4	rac-N-Cyclohexyl-2-benzoyl-4-(p-methoxyphenyl)-5-phenylpyrrolidine-3-spiro-3'-chroman-4'-one	at 293 K	None	None	yellow	None	None	ethanol	None	G.Usha, S.Selvanayagam, M.Yogavel, D.Velmurugan, A.Amalraj, R.Raghunathan, S.S.S.Raj, H.-K.Fun
EMEKOX	RACEMIC	NC_ND_NI	Strict definition of kryptoracemate	KRYPTORACEMIC	NO	P21	4	TRUE	FALSE	7.25	2	1	4	['P']	0	0	2	2	0	[[(1, 'SS'), (1, 'RR')]]	[2]	[2]	['racemic']	['C1']	2	2.0	4.0	RAC-1	contains following chiral atom(s)P	NA	5.845	22.018	18.489	90.0	90.0	90.0	2379.44573769	2.04064492539	C12 H12 Cl2 F12 N4 O6 P4	8',12'-Dichloro-4',4',5,5,5',5',6,6,15',15',16',16'-dodecafluorospiro[1,3,2-dioxaphosphepane-2,10'-[2,7,13,18]tetraoxa[9,11,19,20]tetra-aza[1Î»5,8Î»5,10Î»5,12Î»5]tetraphosphatricyclo [10.6.1.11,8]icosa[1(19),8(20),9,11]tetraene]	at 120 K	None	None	colorless	None	None	None	None	S.Besli, H.Ibisoglu, A.Kilic, I.Un, F.Yuksel
EMIXIH	RACEMIC	NC_ND_NI	Strict definition of kryptoracemate	KRYPTORACEMIC	NO	P212121	19	TRUE	FALSE	4.9	2	1	10	['C']	10	8	5	5	0	[[(1, 'RSSSS'), (1, 'SRRRR')]]	[2]	[2]	['racemic']	['C1']	2	2.0	8.0	RAC-1	contains following chiral atom(s)C	NA	8.5093	19.053	21.34	90.0	90.0	90.0	3459.80496649	1.33389860103	C19 H25 N1 O5	(4aS*,5R*,6S*,7R*,8aR*)-5-Benzyloxymethyl-5,6-epoxy-7-(methoxymethoxy)decahydroisoquinol-3-one	at 173 K	None	118-119 deg.C	None	None	None	diethyl ether/dichloromethane	None	S.M.Sparks, A.J.Gutierrez, K.J.Shea
EMOYIO	RACEMIC	NC_ND_NI	Strict definition of kryptoracemate	KRYPTORACEMIC	NO	P21	4	TRUE	FALSE	6.67	2	1	2	['C']	2	0	1	1	0	[[(1, 'S'), (1, 'R')]]	[2]	[2]	['racemic']	['C1']	2	2.0	4.0	RAC-1	contains following chiral atom(s)C	NA	6.4238	9.6564	21.1332	90.0	97.376	90.0	1300.06119052	1.35021756092	C13 H16 N2 O4	1,3-Dimethyl-3-(5'-methoxy-2'-nitrophenyl)pyrrolidin-2-one	at 293 K	None	None	None	None	None	None	None	P.D.Rege, F.Johnson
ENIPUO	RACEMIC	NC_ND_I	Contains also at least an other enantiomer in enantiopure proportion	KRYPTORACEMIC	NO	P1	1	TRUE	FALSE	4.55	4	2	6	['C']	6	4	4	2	0	[[(1, 'SR'), (1, 'RS')], [(2, 'R')]]	[2, 1]	[2, 2]	['racemic', 'chiral']	['C1']	4	2.0	2.0	Wa-could be Diast	contains following chiral atom(s)C	NA	7.521	13.3056	14.8445	69.283	76.336	85.759	1350.05546916	1.50668141168	C17 H17 F6 N2 O1 1+,C10 H8 F3 O3 1-	2-((2,8-bis(trifluoromethyl)quinolin-4-yl)(hydroxy)methyl)piperidinium 3,3,3-trifluoro-2-methoxy-2-phenylpropanoate	120 K	None	None	colorless	None	None	None	None	J.L.Wardell, S.M.S.V.Wardell, E.R.T.Tiekink
ENIVAZ	RACEMIC	NC_ND_NI	Strict definition of kryptoracemate	KRYPTORACEMIC	NO	P41	76	TRUE	FALSE	6.2	2	1	8	['C']	8	4	4	4	0	[[(1, 'RSSR'), (1, 'SRRS')]]	[2]	[2]	['racemic']	['C2']	2	2.0	8.0	RAC-1	contains following chiral atom(s)C	NA	9.161	9.161	23.388	90.0	90.0	90.0	1962.81266435	1.15223791667	C10 H18 O2	2,5-Dimethylbicyclo(3.3.0)octane-endo-2,endo-6-diol	at 294 K	None	None	colorless	None	None	None	Described as the kryptoracemate/false conglomerate form.	I.Y.H.Chan, V.T.Nguyen, R.Bishop, D.C.Craig, M.L.Scudder
ETAVUS	RACEMIC	NC_ND_I	Contains also at least an other enantiomer in enantiopure proportion + achiral molecule	KRYPTORACEMIC	NO	P1	1	TRUE	FALSE	5.36	6	3	6	['C']	6	4	1	5	0	[[(3, 'S')], [(1, 'S'), (1, 'R')], [(1, 'S')]]	[1, 2, 1]	[3, 2, 1]	['chiral', 'racemic', 'chiral']	['C1']	8	1.0	1.0	W1_enantiopure AU	contains following chiral atom(s)C	NA	10.728	12.611	18.488	76.342	74.524	70.957	2247.93522607	1.50084774812	3(C18 H21 F1 N3 O4 1+),C18 H21 F1 N3 O4 1+,2(C4 H3 N2 O5 1-),2(C3 H2 N1 O5 1-)	tris(4-(6-carboxy-9-fluoro-3-methyl-7-oxo-2,3-dihydro-7H-[1,4]oxazino[2,3,4-ij]quinolin-10-yl)-1-methylpiperazin-1-ium) 9-fluoro-7-hydroxy-3-methyl-10-(4-methylpiperazin-4-ium-1-yl)-2,3-dihydro[1,4]oxazino[2,3,4-ij]quinolin-4-ium-6-carboxylate bis((carboxyamino)(oxo)acetate) bis(4-hydroxy-2,5-dioxoimidazolidine-4-carboxylate)	293 K	None	None	colorless	None	None	None	None	T.S.Thakur, Shiv Shankar Singh
ETPHIM	RACEMIC	NC_ND_I	Strict definition of kryptoracemate + achiral molecule	KRYPTORACEMIC	NO	P21	4	TRUE	FALSE	9.9	2	1	4	['C']	4	0	2	2	0	[[(1, 'SS'), (1, 'RR')]]	[2]	[2]	['racemic']	['C2']	7	2.0	4.0	RAC-1	contains following chiral atom(s)C	NA	9.809	20.874	11.908	90.0	92.09	90.0	2436.57755644	1.1585727519	C24 H32 N3 1+,Cl1 1-,1.5(H2 O1)	5-Dimethylamino-3,4-diethyl-3,4-diphenyl-pyrroline-2-dimethyliminium hydrochloride sesquihydrate	None	None	None	None	None	None	None	None	M.van Meerssche, G.Germain, J.P.Declercq, R.Touillaux, M.Henriet, L.Ghosez
EXIGID	RACEMIC	NC_ND_NI	Strict definition of kryptoracemate	KRYPTORACEMIC	NO	P21	4	TRUE	FALSE	7.27	2	1	2	['C']	2	2	1	1	0	[[(1, 'S'), (1, 'R')]]	[2]	[2]	['racemic']	['C1']	2	2.0	4.0	RAC-1	contains following chiral atom(s)C	NA	10.1302	8.7483	17.3902	90.0	93.729	90.0	1537.89191256	1.65927983122	C14 H14 Br1 N3 O5	5-(1-(3-bromophenyl)-2-nitroethyl)-1,3-dimethylpyrimidine-2,4,6(1H,3H,5H)-trione	100 K	None	None	orange	None	None	None	None	A.Barakat, M.S.Islam, A.M.Al-Majid, H.A.Ghabbour, S.Yousuf, M.Ashraf, N.N.Shaikh, M.Iqbal Choudhary, R.Khalil, Z.Ul-Haq
FABYAL	SCALEMIC	NC_ND_NI	Unbalanced Kryptoracemate	KRYPTORACEMIC	NO	C2	5	TRUE	FALSE	3.7	3	1	6	['C']	6	6	4	2	0	[[(1, 'SS'), (2, 'RR')]]	[2]	[3]	['scalemic']	['C2']	3	1.5	6.0	scal-3-attention could contain stereoisomer	contains following chiral atom(s)C	NA	22.033	13.7588	11.1924	90.0	93.954	90.0	3384.87352379	2.05956979572	C30 H20 F2 O3	1,1'-oxybis(6-fluoro-3-phenyl-1H-isochromene)	296 K	None	None	colorless	None	None	None	None	D.Lehnherr, J.M.Alzola, E.B.Lobkovsky, W.R.Dichtel
FAHQUB	RACEMIC	NC_ND_I	Strict definition of kryptoracemate + achiral molecule	KRYPTORACEMIC	NO	P21	4	TRUE	FALSE	3.84	2	1	4	['C']	4	4	2	2	0	[[(1, 'SR'), (1, 'RS')]]	[2]	[2]	['racemic']	['C1']	5	2.0	4.0	RAC-1	contains following chiral atom(s)C	NA	5.7341	30.789	8.577	90.0	106.63	90.0	1450.90881857	1.39303943246	C12 H16 N1 O2 1+,C2 H1 O4 1-,0.5(H2 O1)	cis-2-Phenyl-3-methoxycarbonyl-pyrrolidinium oxalate hemihydrate	at 298 K	None	None	None	None	None	methanol	None	S.Suresh, M.Periasamy
FALFIH	RACEMIC	NC_ND_I	Contains also at least an other enantiomer in enantiopure proportion + achiral molecule	KRYPTORACEMIC	NO	P21	4	TRUE	FALSE	4.46	3	2	4	['C']	4	4	3	1	0	[[(1, 'S'), (1, 'R')], [(1, 'RR')]]	[2, 1]	[2, 1]	['racemic', 'chiral']	['C1']	4	1.0	2.0	W1_enantiopure AU	contains following chiral atom(s)C	NA	14.605	10.034	12.129	90.0	104.439	90.0	1721.31978398	1.18985237571	2(C8 H12 N1 1+),C18 H14 N2 O6 2-,H2 O1	bis(1-Phenylethylammonium) (R,R)-N,N'-oxalyl-bis(phenylglcinate) monohydrate	None	None	None	colorless	None	None	None	None	M.Akazome, T.Takahashi, K.Ogura
FALQIT	RACEMIC	NC_ND_NI	Contains at least 2 different chemicals in racemic proportions	KRYPTORACEMIC	NO	C2	5	TRUE	FALSE	5.35	4	2	8	['C']	8	8	4	4	0	[[(1, 'SS'), (1, 'RR')], [(1, 'SS'), (1, 'RR')]]	[2, 2]	[2, 2]	['racemic', 'racemic']	['C2', 'C1']	4	1.0	4.0	RAC-1	contains following chiral atom(s)C	NA	14.638	9.911	23.027	90.0	101.03	90.0	3278.9809481	1.9141967071	C18 H14 O8,2(C7 H14 O1)	rac-Dibenzoyl-tartaric acid bis(rac-2-methyl-cyclohexanol) clathrate	at 293 K	None	None	colorless	None	None	None	None	Z.Kovari, Z.Bocskei, C.Kassai, E.Fogassy, D.Kozma
FARVEB	RACEMIC	NC_ND_NI	Strict definition of kryptoracemate	KRYPTORACEMIC	NO	P212121	19	TRUE	FALSE	7.16	2	1	2	['C']	2	2	1	1	0	[[(1, 'S'), (1, 'R')]]	[2]	[2]	['racemic']	['C1']	2	2.0	8.0	RAC-1	contains following chiral atom(s)C	NA	7.8319	12.3938	24.6888	90.0	90.0	90.0	2396.46780441	1.34296835985	C15 H14 O3	2-Isopropyl-4H-naphtho[2,3-d][1,3]dioxin-4-one	at 100 K	None	None	colorless	None	None	None	None	S.Grabowsky, P.M.Dean, B.W.Skelton, A.N.Sobolev, M.A.Spackman, A.H.White
FASLAN	RACEMIC	NC_ND_NI	Strict definition of kryptoracemate	KRYPTORACEMIC	NO	P212121	19	TRUE	FALSE	8.37	2	1	4	['C']	4	4	2	2	0	[[(1, 'SR'), (1, 'RS')]]	[2]	[2]	['racemic']	['C1']	2	2.0	8.0	RAC-1	contains following chiral atom(s)C	NA	9.724	15.047	27.432	90.0	90.0	90.0	4013.7687121	1.07725743163	C22 H31 N1 O1	rac-(R,S)-2,2,5-Trimethyl-3-(1-phenylethoxy)-4-phenyl-3-azahexane	at 298 K	None	None	colorless	None	None	None	None	R.Braslau, V.Chaplinski, A.Nilsen, N.Arulsamy
FASQOF	RACEMIC	NC_ND_NI	Strict definition of kryptoracemate	KRYPTORACEMIC	NO	P21	4	TRUE	FALSE	1.7	2	1	4	['P']	0	0	2	2	0	[[(1, 'SS'), (1, 'RR')]]	[2]	[2]	['racemic']	['C1']	2	2.0	4.0	RAC-1	contains following chiral atom(s)P	NA	8.723	38.29	10.938	90.0	109.06	90.0	3453.04596395	1.26723934558	C34 H40 N6 P2 S2	cis-2,5-bis(Diethylamino)-3,6-bis(phenylimino)-1,4-diphenyl-2,5-dithio-1,4,2,5-diazadiphosphorinane	None	None	208-209 deg.C	None	None	None	octane/ethyl acetate	None	G.V.Oshovsky, A.M.Pinchuk, A.N.Chernega, I.I.Pervak, A.A.Tolmachev
FATFUB	RACEMIC	NC_ND_NI	Strict definition of kryptoracemate	KRYPTORACEMIC	NO	P21	4	TRUE	FALSE	8.4	4	1	4	['C']	4	4	2	2	0	[[(2, 'S'), (2, 'R')]]	[2]	[4]	['racemic']	['C1']	4	4.0	8.0	RAC-2	contains following chiral atom(s)C	NA	20.907	9.969	10.967	90.0	105.25	90.0	2205.2749659	1.22429258822	C11 H13 N3 O1	1,6-Dihydro-1,6-dimethyl-4-phenyl-1,2,3-triazine 2-oxide	None	None	76-77deg.C	None	None	None	None	None	A.Ohsawa, H.Arai, H.Ohnishi, T.Kaihoh, T.Itoh, K.Yamaguchi, H.Igeta, Y.Iitaka
FELBEF	RACEMIC	NC_ND_NI	Strict definition of kryptoracemate	KRYPTORACEMIC	NO	P21	4	TRUE	FALSE	3.21	2	1	4	['C']	4	4	2	2	0	[[(1, 'SR'), (1, 'RS')]]	[2]	[2]	['racemic']	['C1']	2	2.0	4.0	RAC-1	contains following chiral atom(s)C	NA	15.6734	6.13	22.7367	90.0	97.0025	90.0	2168.2008286	1.30960256532	C26 H25 N3 O3	2,6,9-Triphenyl-1,2,4,4a,6a,7,9,10-octahydro-6H-bis[1,2]oxazino[5,4-c:4',5'-e][1,2]oxazine	at 200 K	None	None	colorless	None	None	None	None	Ruomeng Wang, G.Bojase, A.C.Willis, M.N.Paddon-Row, M.S.Sherburn
FEQBEL	RACEMIC	NC_ND_NI	Strict definition of kryptoracemate	KRYPTORACEMIC	NO	P21	4	TRUE	FALSE	9.8	2	1	2	['C']	2	2	1	1	0	[[(1, 'S'), (1, 'R')]]	[2]	[2]	['racemic']	['C1']	2	2.0	4.0	RAC-1	contains following chiral atom(s)C	NA	10.1162	6.172	17.993	90.0	104.322	90.0	1088.51693944	1.42308135635	C9 H13 F2 N3 O2	1-[5-(difluoromethyl)-1-nitroso-4,5-dihydro-1H-pyrazol-3-yl]-2,2-dimethylpropan-1-one	100 K	None	None	None	None	None	None	None	P.S.Lebed, J.Fenneteau, Yong Wu, J.Cossy, P.K.Mykhailiuk
FIKPEW	RACEMIC	NC_ND_NI	Strict definition of kryptoracemate	KRYPTORACEMIC	NO	P21	4	TRUE	FALSE	7.55	2	1	2	['C']	2	2	1	1	0	[[(1, 'S'), (1, 'R')]]	[2]	[2]	['racemic']	['C1']	2	2.0	4.0	RAC-1	contains following chiral atom(s)C	NA	9.4469	17.1418	11.7537	90.0	92.003	90.0	1902.19443928	1.27252494968	C20 H26 F2 N2 O2	N-t-Butyl-2-(3,4-difluorophenyl)-1-oxo-2-azaspiro[4.5]decane-3-carboxamide	at 100 K	None	None	colorless	None	None	None	None	V.Yu.Stolyarenko, A.A.Evdokimov, V.I.Shishkin
FILWOP	RACEMIC	NC_ND_NI	Strict definition of kryptoracemate	KRYPTORACEMIC	NO	P21	4	TRUE	FALSE	8.39	2	1	2	['C']	2	2	1	1	0	[[(1, 'S'), (1, 'R')]]	[2]	[2]	['racemic']	['C1']	2	2.0	4.0	RAC-1	contains following chiral atom(s)C	NA	6.468	24.149	12.121	90.0	101.11	90.0	1857.76718821	1.15920020829	C20 H25 B1 O3	2-(1,2-diphenylethoxy)-4,4,5,5-tetramethyl-1,3,2-dioxaborolane	173.2 K	None	None	None	None	None	None	None	Heng Song, Ke Ye, Peiyu Geng, Xiao Han, Rongzhen Liao, Chen-Ho Tung, Wenguang Wang
FIRDOC	SCALEMIC	NC_ND_I	Unbalanced Kryptoracemate + achiral molecule	KRYPTORACEMIC	NO	P21	4	TRUE	FALSE	5.17	3	1	3	['C']	3	3	1	2	0	[[(2, 'S'), (1, 'R')]]	[2]	[3]	['scalemic']	['C1']	6	3.0	6.0	scal-3-attention could contain stereoisomer	contains following chiral atom(s)C	NA	7.2588	8.9399	22.7927	90.0	95.818	90.0	1471.46655364	1.2096932254	C7 H15 N2 O1 1+,Cl1 1-	3-cyano-2-hydroxy-N,N,N-trimethylpropan-1-aminium chloride	183 K	None	None	yellow	None	None	None	None	M.Babor, P.P.Nievergelt, J.Cejka, V.Zvonicek, B.Spingler
FIVPOR	RACEMIC	NC_ND_NI	Strict definition of kryptoracemate	KRYPTORACEMIC	NO	P1	1	TRUE	FALSE	3.16	2	1	2	['C']	2	2	1	1	0	[[(1, 'S'), (1, 'R')]]	[2]	[2]	['racemic']	['C1']	2	2.0	2.0	RAC-1	contains following chiral atom(s)C	NA	6.1413	8.6786	14.2186	84.699	83.15	74.522	723.670416286	1.38272243772	C18 H11 N3 O2	2-(4-Nitrophenyl)azulene-1,1(8aH)-dicarbonitrile	at 150 K	None	None	yellow	None	None	None	None	S.L.Broman, M.Jevric, A.D.Bond, M.B.Nielsen
FIWJOK	RACEMIC	NC_ND_NI	Strict definition of kryptoracemate	KRYPTORACEMIC	NO	P1	1	TRUE	FALSE	7.8	4	1	4	['C']	4	4	2	2	0	[[(2, 'S'), (2, 'R')]]	[2]	[4]	['racemic']	['C1']	4	4.0	4.0	RAC-2	contains following chiral atom(s)C	NA	10.216	12.227	12.467	98.58	100.94	111.11	1385.54291378	1.12831208243	C15 H25 N1 O1	N-(1-(1-Adamantyl)propyl)acetamide	None	None	None	None	None	None	None	y(C39) is -0.130, not -0.132. y(C48) is 0.820, not 0.822. y(C411) is 0.641, not 0.643	V.A.Tafeenko, A.E.Prozorovskii, V.B.Ribakov, E.A.Shokova, V.V.Kovalev
FIZROX	RACEMIC	NC_ND_NI	Strict definition of kryptoracemate	KRYPTORACEMIC	NO	P212121	19	TRUE	FALSE	3.85	2	1	2	['C']	2	0	1	1	0	[[(1, 'S'), (1, 'R')]]	[2]	[2]	['racemic']	['C1']	2	2.0	8.0	RAC-1	contains following chiral atom(s)C	NA	7.2754	16.048	25.129	90.0	90.0	90.0	2933.95195488	1.38246153683	C15 H19 N3 O4	(R)-2-(4-isopropyl-4-methyl-5-oxo-4,5-dihydro-1H-imidazol-2-yl)-5-(methoxymethyl)nicotinic acid	103 K	None	None	None	None	None	None	None	D.Braga, L.Chelazzi, F.Grepioni, S.Nanna, K.Rubini, M.Curzi, S.Giaffreda, H.E.Saxell, M.Bratz, Tiziana Chiodo
FODLAN	RACEMIC	NC_ND_NI	Strict definition of kryptoracemate + achiral molecule	KRYPTORACEMIC	NO	P212121	19	TRUE	FALSE	6.68	2	1	4	['C']	4	0	2	2	0	[[(1, 'SS'), (1, 'RR')]]	[2]	[2]	['racemic']	['C2']	4	2.0	8.0	RAC-1	contains following chiral atom(s)C	NA	10.3985	15.263	33.179	90.0	90.0	90.0	5265.91558418	1.66897071906	C24 H12 N6 O4 S4,C1 H2 Cl2	11a,11b-dimethyl-9,14-dinitro-11a,11b-dihydrobis[1]benzothieno[2',3':7,8;3'',2'':5,6][1,2,5]thiadiazolo[3',4':3,4]naphtho[1,2-c][1,2,5]thiadiazole dichloromethane solvate	at 140 K	None	None	red	None	None	None	None	Wenlong Li, Changhong Jiao, Xin Li, Yongshu Xie, K.Nakatani, He Tian, Weihong Zhu
FOHLIY	RACEMIC	NC_ND_I	Strict definition of kryptoracemate + achiral molecule	KRYPTORACEMIC	NO	P21	4	TRUE	FALSE	7.18	2	1	2	['N']	0	2	1	1	0	[[(1, 'S'), (1, 'R')]]	[2]	[2]	['racemic']	['C1']	4	2.0	4.0	RAC-1	contains following chiral atom(s)N	NA	5.739	33.684	6.003	90.0	106.79	90.0	1110.98452263	1.16994429877	C11 H14 N1 1+,Cl1 1-	N-Benzyl-N-methylprop-2-yn-1-aminium chloride	at 294 K	None	None	colorless	monoclinic polymorph	None	chloroform/benzene/butanone 1:1:0.1	None	A.Hempel, N.Camerman, A.Camerman, D.Mastropaolo
FUVYIG	RACEMIC	NC_ND_NI	Strict definition of kryptoracemate	KRYPTORACEMIC	NO	P1	1	TRUE	FALSE	5.24	2	1	2	['C']	2	2	1	1	0	[[(1, 'S'), (1, 'R')]]	[2]	[2]	['racemic']	['C1']	2	2.0	2.0	RAC-1	contains following chiral atom(s)C	NA	7.8296	8.6596	13.206	99.056	90.296	106.011	848.807851186	1.36701138416	C17 H20 N1 O3 P1 S1	Diethyl 10,11-dihydrodibenzo[b,f][1,4]thiazepin-11-ylphosphonate	296 K	None	None	white	None	None	None	None	D.Saha, T.Kaur, Neetu Singh, U.P.Singh, A.Sharma
GABGOF	RACEMIC	NC_ND_NI	Strict definition of kryptoracemate	KRYPTORACEMIC	NO	P21	4	TRUE	FALSE	7.22	2	1	2	['C']	2	0	1	1	0	[[(1, 'S'), (1, 'R')]]	[2]	[2]	['racemic']	['C1']	2	2.0	4.0	RAC-1	contains following chiral atom(s)C	NA	12.5823	17.5486	12.9804	90.0	95.635	90.0	2852.24492752	1.25334571186	C24 H16 Cl4 N2 O4	7-t-Butyl-3,5'-bis(2,6-dichlorophenyl)-4-oxo-spiro-((benzo(d)isoxazole)-5,2'-(1',3',4'-dioxazole))	None	None	None	colorless	None	None	None	The structure formed appears to be compound 15b from the paper and not 14b as stated in the paper	V.Nair, K.V.Radhakrishnan, K.C.Sheela, N.P.Rath
GACWUE	RACEMIC	NC_ND_NI	Strict definition of kryptoracemate	KRYPTORACEMIC	NO	P212121	19	TRUE	FALSE	3.24	2	1	4	['C']	4	0	2	2	0	[[(1, 'SS'), (1, 'RR')]]	[2]	[2]	['racemic']	['C1']	2	2.0	8.0	RAC-1	contains following chiral atom(s)C	NA	15.7294	20.0784	21.5051	90.0	90.0	90.0	6791.76616468	1.37050641876	C40 H32 N2 O10	Tetramethyl 5,5''-bis(benzylimino)-5H,5''H-dispiro[furan-2,1'-acenaphthylene-2',2''-furan]-3,3'',4,4''-tetracarboxylate	at 100 K	None	None	colorless	None	None	None	None	M.T.Maghsoodlou, N.Hazeri, S.M.Habibi-Khorassani, M.Ziyaadini, G.Marandi, K.Khandan-Barani, P.Ebrahimi, F.R.Charati, A.Sobolev, M.Makha
GAFJIH	RACEMIC	NC_ND_NI	Strict definition of kryptoracemate	KRYPTORACEMIC	NO	P21	4	TRUE	FALSE	3.96	2	1	4	['P']	0	0	2	2	0	[[(1, 'SS'), (1, 'RR')]]	[2]	[2]	['racemic']	['C1']	2	2.0	4.0	RAC-1	contains following chiral atom(s)P	NA	10.3901	19.0419	12.555	90.0	110.29	90.0	2329.84037914	1.41647955693	C19 H28 Cl1 N8 P3	12-Chloro-14,14-dianilino-2,6,11,13,15,16-hexa-aza-1,12,14-triphosphatricyclohexadeca-1,12,14-triene	at 120 K	None	248 deg.C	colorless	None	None	tetrahydrofuran/hexane	None	S.Besli, S.J.Coles, D.B.Davies, M.B.Hursthouse, H.Ibisoglu, A.Kilic, R.A.Shaw
GAFWAL	RACEMIC	NC_ND_NI	Strict definition of kryptoracemate	KRYPTORACEMIC	NO	P212121	19	TRUE	FALSE	7.1	2	1	2	['C']	2	2	1	1	0	[[(1, 'S'), (1, 'R')]]	[2]	[2]	['racemic']	['C1']	2	2.0	8.0	RAC-1	contains following chiral atom(s)C	NA	7.773	15.371	17.836	90.0	90.0	90.0	2131.02357359	1.34796164593	C12 H12 N2 O2	(+-)-(Z)-1,10a-Dihydropyrrolo(1,2-b)isoquinoline-3,10(2H,5H)-dione oxime	None	None	214-216deg.C	None	None	None	None	None	L.L.Martin, S.J.Scott, L.L.Setescak, D.Van Engen
GAGFAX	RACEMIC	NC_ND_NI	Strict definition of kryptoracemate	KRYPTORACEMIC	NO	P1	1	TRUE	FALSE	4.82	2	1	2	['C']	2	2	1	1	0	[[(1, 'S'), (1, 'R')]]	[2]	[2]	['racemic']	['C1']	2	2.0	2.0	RAC-1	contains following chiral atom(s)C	NA	9.495	10.33	11.612	110.73	97.3	113.68	926.07478963	1.34993405974	C18 H20 N2 O5 S1	Ethyl 5-(2,4-dimethoxyphenyl)-7-methyl-3-oxo-3,5-dihydro-2H-thiazolo(3,2-a)pyrimidine-6-carboxylate	at 293 K	None	129-130 deg.C	orange	None	None	ethanol	The deposited cif has the structure modelled in space group P1, as opposed to P-1 as given in the paper	I.V.Kulakov, G.M.Isabaeva, S.D.Fazylov, D.M.Turdybekov, O.A.Nurkenov, K.M.Yurdybekov
GANMUD	RACEMIC	NC_ND_NI	Strict definition of kryptoracemate	KRYPTORACEMIC	NO	P212121	19	TRUE	FALSE	6.6	2	1	2	['N']	0	0	1	1	0	[[(1, 'S'), (1, 'R')]]	[2]	[2]	['racemic']	['C1']	2	2.0	8.0	RAC-1	contains following chiral atom(s)N	NA	6.827	10.798	29.622	90.0	90.0	90.0	2183.67299641	1.51824681411	C4 H10 B2 Cl4 N2	2-Chloro-1,3-dimethyl-1-(trichloro-bora)-1,3,2-diazaborolidine	None	None	85deg.C	None	None	None	None	None	K.Anton, H.Noth, H.Pommerening
GAPFIO	RACEMIC	NC_ND_NI	Strict definition of kryptoracemate	KRYPTORACEMIC	NO	P212121	19	TRUE	FALSE	5.25	2	1	2	['C']	2	2	1	1	0	[[(1, 'S'), (1, 'R')]]	[2]	[2]	['racemic']	['C1']	2	2.0	8.0	RAC-1	contains following chiral atom(s)C	NA	10.601	15.762	16.793	90.0	90.0	90.0	2805.99211087	1.34597942722	C17 H16 O4	7-Methoxy-3-(4-methoxyphenyl)-2,3-dihydro-4H-chromen-4-one	at 296 K	None	None	colorless	None	None	None	None	Zhi-Yun Peng, Xiao-Yang Liu, Ye-Ling Yang, Kai-Shuang Xiang, Zhu-Ping Xiao
GASQAT	RACEMIC	NC_ND_NI	Strict definition of kryptoracemate	KRYPTORACEMIC	NO	P21	4	TRUE	FALSE	4.8	2	1	2	['C']	2	2	1	1	0	[[(1, 'S'), (1, 'R')]]	[2]	[2]	['racemic']	['C1']	2	2.0	4.0	RAC-1	contains following chiral atom(s)C	NA	11.684	9.293	15.71	90.0	102.586	90.0	1664.79266768	1.30614793044	C19 H21 N1 O4	3-Methoxyaegeline	at 100 K	None	138-139 deg.C	colorless	None	None	ethyl acetate/methanol	None	S.A.Ross, M.A.Al-Azeib, K.S.Krishnaveni, F.R.Fronczek, C.L.Burandt
GEFNEM01	RACEMIC	NC_ND_NI	Strict definition of kryptoracemate	KRYPTORACEMIC	NO	P21	4	TRUE	FALSE	3.76	2	1	2	['C']	2	2	1	1	0	[[(1, 'S'), (1, 'R')]]	[2]	[2]	['racemic']	['C1']	2	2.0	4.0	RAC-1	contains following chiral atom(s)C	NA	8.3875	12.9511	13.3838	90.0	98.248	90.0	1438.80872729	1.40053335271	C18 H13 N3 S1	6-(2-Thienyl)-5,6-dihydrobenzimidazo[1,2-c]quinazoline	at 150 K	None	None	black	None	None	None	None	S.Sen, S.Sarkar, B.Chattopadhyay, Anuradha Moirangthem, A.Basu, K.Dhara, P.Chattopadhyay
GEFQUE	RACEMIC	NC_ND_NI	Strict definition of kryptoracemate	KRYPTORACEMIC	NO	P21	4	TRUE	FALSE	6.02	4	1	12	['C']	12	12	6	6	0	[[(2, 'SRR'), (2, 'RSS')]]	[2]	[4]	['racemic']	['C1']	4	4.0	8.0	RAC-2	contains following chiral atom(s)C	NA	10.417	22.057	12.115	90.0	90.138	90.0	2783.62844731	1.22312806019	C12 H20 N2 O4	N-t-Butoxycarbonyl-5-syn-(methoxycarbonylamino)-2-azabicyclo(2.1.1)hexane	at 143 K	None	84deg.C	None	None	None	cyclohexane/ethyl acetate	None	G.R.Krow, Qiuli Huang, Guoliang Lin, R.A.Centafont, A.M.Thomas, D.Gandla, C.DeBrosse, P.J.Carroll
GEGREQ	RACEMIC	NC_ND_NI	Strict definition of kryptoracemate	KRYPTORACEMIC	NO	P21	4	TRUE	FALSE	10.82	4	1	8	['C']	8	8	4	4	0	[[(2, 'SR'), (2, 'RS')]]	[2]	[4]	['racemic']	['C1']	4	4.0	8.0	RAC-2	contains following chiral atom(s)C	NA	15.233	8.987	41.163	90.0	100.163	90.0	5546.75513159	1.2757298826	C42 H28	cis-1,2-bis(Fluoren-9-ylidene)-3,4-diphenylcyclobutane	at 113 K	None	214-218deg.C	orange	None	None	dichloromethane/diethyl ether	None	E.V.Banide, Y.Ortin, C.M.Seward, L.E.Harrington, H.Muller-Bunz, M.J.McGlinchey
GENJOZ01	RACEMIC	NC_ND_I	Contains also at least an other enantiomer in enantiopure proportion + achiral molecule	KRYPTORACEMIC	NO	P21	4	TRUE	FALSE	4.77	4	2	16	['C' 'N']	14	14	5	11	0	[[(1, 'S'), (1, 'R')], [(2, 'SRSSSSR')]]	[2, 1]	[2, 2]	['racemic', 'chiral']	['C1']	7	2.0	4.0	Wa-could be Diast	contains following chiral atom(s)C,N	NA	8.714	31.611	12.487	90.0	92.04	90.0	3437.46723475	1.40229361199	C23 H27 N2 O4 1+,C10 H8 N3 O7 1-,1.5(C1 H4 O1)	2,3-Dimethoxy-10-oxostrychnidin-19-ium 2-((3,5-dinitrobenzoyl)amino)propanoate methanol solvate	at 100 K	None	417 K	orange	None	None	None	None	A.Bialonska, Z.Ciunik
GETSIH	RACEMIC	NC_ND_NI	Strict definition of kryptoracemate	KRYPTORACEMIC	NO	P21	4	TRUE	FALSE	10.5	2	1	10	['C']	10	10	5	5	0	[[(1, 'SRRSS'), (1, 'RSSRR')]]	[2]	[2]	['racemic']	['C1']	2	2.0	4.0	RAC-1	contains following chiral atom(s)C	NA	9.072	18.512	9.838	90.0	110.65	90.0	1546.05176243	1.22586574061	C17 H19 N1 O3	1Î²,3,3aÎ±,4Î±,5Î±,7aÎ±-Hexahydro-1,5-dimethyl-3-oxo-N-phenyl-4-isobenzofurancarboxamide	None	None	125deg.C	colorless	None	None	None	None	R.Tripathy, R.W.Franck, K.D.Onan
GEWQAC	RACEMIC	NC_ND_NI	Strict definition of kryptoracemate	KRYPTORACEMIC	NO	P21	4	TRUE	FALSE	4.97	2	1	4	['C']	4	4	2	2	0	[[(1, 'SS'), (1, 'RR')]]	[2]	[2]	['racemic']	['C1']	2	2.0	4.0	RAC-1	contains following chiral atom(s)C	NA	12.8525	8.9319	19.3506	90.0	107.583	90.0	2117.61272052	1.20290409001	C22 H25 N1 O3 S1	4-Methyl-N-(5-methyl-4-oxo-2-phenyl-3-propylcyclopent-2-en-1-yl)benzenesulfonamide	at 296 K	None	None	colorless	None	None	None	None	Dongqi Wang, Fen Wang, Guoyong Song, Xingwei Li
GIBXAR	RACEMIC	NC_ND_NI	Strict definition of kryptoracemate	KRYPTORACEMIC	NO	P21	4	TRUE	FALSE	3.0	2	1	4	['C']	4	4	2	2	0	[[(1, 'SR'), (1, 'RS')]]	[2]	[2]	['racemic']	['C1']	2	2.0	4.0	RAC-1	contains following chiral atom(s)C	NA	8.0483	26.0319	8.5833	90.0	99.726	90.0	1772.4617334	1.36577120188	C22 H20 O3 S1	10-(p-Toluenesulfonylmethyl)-9,10-dihydrophenanthren-9-ol	at 223 K	None	None	colorless	None	None	None	None	M.Tamiya, C.Jager, K.Ohmori, K.Suzuki
GICSOA	RACEMIC	NC_ND_NI	Strict definition of kryptoracemate	KRYPTORACEMIC	NO	P21	4	TRUE	FALSE	4.1	2	1	2	['C']	2	0	1	1	0	[[(1, 'S'), (1, 'R')]]	[2]	[2]	['racemic']	['C1']	2	2.0	4.0	RAC-1	contains following chiral atom(s)C	NA	6.635	16.49	10.133	90.0	106.93	90.0	1060.61509711	1.40416449998	C9 H12 N4 O3	1,3,5,7-Tetramethyl-5,7-dihydrouric acid	None	None	196-200deg.C	None	None	None	None	Published H9 with fw = 221.2; we calculate H12	J.Zylber, L.Ouazzani-Chahdi, A.Chiaroni, C.Riche
GIGSOE	RACEMIC	NC_ND_NI	Strict definition of kryptoracemate	KRYPTORACEMIC	NO	P212121	19	TRUE	FALSE	6.2	2	1	10	['C']	10	8	5	5	0	[[(1, 'RSSSS'), (1, 'SRRRR')]]	[2]	[2]	['racemic']	['C1']	2	2.0	8.0	RAC-1	contains following chiral atom(s)C	NA	8.8676	16.156	16.3497	90.0	90.0	90.0	2342.33888108	1.19275899844	C13 H22 O2	2,13-Dihydroxytricyclo(7.3.1.02,7)tridecane	None	None	None	None	None	None	None	Dx reported as 1.198; we calculate 1.10	A.P.Kriben'ko, T.G.Nikolaeva, L.M.Yudovich, N.T.Komyagin, A.I.Yanovsky, Yu.T.Struchkov, V.G.Kharchenko
GIHDEG10	RACEMIC	NC_ND_I	Strict definition of kryptoracemate + achiral molecule	KRYPTORACEMIC	NO	P21	4	TRUE	FALSE	4.1	2	1	4	['C']	4	4	2	2	0	[[(1, 'SS'), (1, 'RR')]]	[2]	[2]	['racemic']	['C1']	7	1.0	2.0	RAC-1	contains following chiral atom(s)C	NA	9.911	19.688	15.019	90.0	93.11	90.0	2926.30777324	1.32850575981	2(C30 H30 O2 P2),H3 O1 1+,Cl1 O4 1-,C2 H6 O1,2(H2 O1)	bis(Tetraphenyl-1,2-cyclohexylenediphosphine dioxide) oxonium perchlorate ethanol solvate dihydrate	at -120 deg.C	None	None	None	None	None	None	The cell angle beta should probably be 93.11 (not 98.11); no reply from authors	M.Yu.Antipin, E.I.Matrosov, Yu.T.Struchkov, M.I.Kabachnik
GILYEG	RACEMIC	NC_ND_NI	Strict definition of kryptoracemate	KRYPTORACEMIC	NO	P21	4	TRUE	FALSE	9.57	2	1	4	['C']	4	4	2	2	0	[[(1, 'SR'), (1, 'RS')]]	[2]	[2]	['racemic']	['C1']	2	2.0	4.0	RAC-1	contains following chiral atom(s)C	NA	8.8384	27.251	9.9448	90.0	95.684	90.0	2383.48033357	1.26949389767	C28 H29 N3 O3	exo-5-Ethoxy-3-(3-(4-ethoxyphenyl)-1-phenyl-1H-pyrazol-4-yl)-2-phenylisoxazolidine	at 293 K	None	104 deg.C	yellow	None	None	None	None	K.Karthikeyan, P.T.Perumal, S.Etti, G.Shanmugam
GINSOM	RACEMIC	NC_D_I	Contains also at least an other enantiomer in enantiopure proportion + achiral molecule	KRYPTORACEMIC	NO	C2	5	TRUE	TRUE	5.84	8	2	16	['C' 'P']	8	8	4	12	0	[[(4, 'SS')], [(2, 'SR'), (2, 'RS')]]	[1, 2]	[4, 4]	['chiral', 'racemic']	['C2']	14	2.0	8.0	RAC-2	contains following chiral atom(s)P,C	NA	23.924	16.3271	24.0191	90.0	94.081	90.0	9358.30073759	1.73566976382	2(C6 H15 N2 1+),C6 H18 O6 P2 Si2 2-,3.22(C1 H1 Cl3)	bis(2-aminocyclohexanaminium) 1,2-bis(trimethylsilyloxy)diphosphane-1,2-diolate 1,2-dioxide chloroform solvate	at 200 K	None	None	colorless	None	None	None	None	C.Ruflin, U.Fischbach, H.Grutzmacher, J.Levalois-Grutzmacher
GIWRIO	RACEMIC	NC_ND_NI	Strict definition of kryptoracemate	KRYPTORACEMIC	NO	P1	1	TRUE	FALSE	6.29	2	1	4	['C']	4	0	2	2	0	[[(1, 'SS'), (1, 'RR')]]	[2]	[2]	['racemic']	['C1']	2	2.0	2.0	RAC-1	contains following chiral atom(s)C	NA	9.899	12.169	13.444	79.54	80.366	69.755	1484.55714387	1.07954307115	C27 H34 N2 O6	anti-N-(2-(2,2-Dimethoxyethyl)phenyl)-3a-hydroxy-1-(4-methoxybenzyl)-2-oxo-octahydro-7aH-indole-7a-carboxamide	at 200 K	None	None	colorless	None	None	None	None	M.Vamos, K.Ozboya, Y.Kobayashi
GIZSOZ	RACEMIC	NC_ND_NI	Strict definition of kryptoracemate	KRYPTORACEMIC	NO	P21	4	TRUE	FALSE	2.19	2	1	8	['C']	8	6	4	4	0	[[(1, 'RSSR'), (1, 'SRRS')]]	[2]	[2]	['racemic']	['C1']	2	2.0	4.0	RAC-1	contains following chiral atom(s)C	NA	12.4043	11.4302	17.7674	90.0	92.4761	90.0	2516.77443181	1.42387680649	C24 H34 I1 N1 O3 Si1	3-Hydroxy-7a-((2-iodophenyl)((triethylsilyl)oxy)methyl)-2-methyl-4,7-bis(methylene)octahydro-1H-isoindol-1-one	at 88 K	None	None	colorless	None	None	None	None	G.M.Schwarzwalder, S.E.Steinhardt, H.V.Pham, K.N.Houk, C.D.Vanderwal
GOHBOW	RACEMIC	NC_ND_NI	Strict definition of kryptoracemate	KRYPTORACEMIC	NO	P21	4	TRUE	FALSE	7.15	2	1	6	['C']	6	6	3	3	0	[[(1, 'RRS'), (1, 'SSR')]]	[2]	[2]	['racemic']	['C1']	2	2.0	4.0	RAC-1	contains following chiral atom(s)C	NA	8.873	17.675	10.481	90.0	90.73	90.0	1643.60469956	1.18153236155	C20 H20 O2	4-(2-methylprop-1-en-1-yl)-3,5-diphenyldihydrofuran-2(3H)-one	at 133 K	None	None	colorless	None	None	None	None	J.W.Bats, K.Hoyer, J.Mulzer
GOJPAZ	SCALEMIC	NC_ND_NI	Unbalanced Kryptoracemate	KRYPTORACEMIC	NO	P21	4	TRUE	FALSE	6.35	3	1	6	['C']	6	6	2	4	0	[[(2, 'SS'), (1, 'RR')]]	[2]	[3]	['scalemic']	['C1']	3	3.0	6.0	scal-3-attention could contain stereoisomer	contains following chiral atom(s)C	NA	9.6819	9.8937	25.25	90.0	97.704	90.0	2396.861304	1.49335006926	C19 H19 Br1 O2	1-(4-bromophenyl)-2-(5-phenyloxan-2-yl)ethan-1-one	100 K	None	None	colorless	None	None	None	None	D.Csokas, Annabel Xuan Ying Ho, R.O.Ramabhadran, R.W.Bates
GOLXOU	RACEMIC	NC_ND_NI	Strict definition of kryptoracemate	KRYPTORACEMIC	NO	P212121	19	TRUE	FALSE	6.5	2	1	4	['C']	4	4	2	2	0	[[(1, 'SS'), (1, 'RR')]]	[2]	[2]	['racemic']	['C1']	2	2.0	8.0	RAC-1	contains following chiral atom(s)C	NA	7.5028	17.3288	26.1306	90.0	90.0	90.0	3397.35743304	1.32328382905	C20 H18 O3 S1	9-Hydroxy-4-methyl-8-phenylthio-7,8,9,10-tetrahydrobenzo(h)coumarin	None	None	None	colorless	None	None	chloroform/methanol	None	K.Chinnakali, K.Sriraghavan, Hoong-Kun Fun, V.T.Ramakrishnan
GOQSIO	RACEMIC	NC_ND_NI	Strict definition of kryptoracemate	KRYPTORACEMIC	NO	P43212	96	TRUE	FALSE	5.01	2	1	8	['C']	8	8	4	4	0	[[(1, 'SSSS'), (1, 'RRRR')]]	[2]	[2]	['racemic']	['D2']	2	1.0	8.0	RAC-1	contains following chiral atom(s)C	NA	13.9032	13.9032	23.9326	90.0	90.0	90.0	4626.14693517	2.85377998522	C18 H24 S8	rac-bis(1,2-Diethylethylenedithio)tetrathiafulvalene	None	None	None	orange	None	None	None	None	A.M.Kini, J.P.Parakka, U.Geiser, Hsien-Hau Wang, F.Rivas, E.DiNino, S.Thomas, J.D.Dudek, J.M.Williams
GUCJOE	RACEMIC	NC_ND_NI	Strict definition of kryptoracemate	KRYPTORACEMIC	NO	P21	4	TRUE	FALSE	4.8	2	1	2	['C']	2	2	1	1	0	[[(1, 'S'), (1, 'R')]]	[2]	[2]	['racemic']	['C1']	2	2.0	4.0	RAC-1	contains following chiral atom(s)C	NA	12.2873	4.6925	14.3359	90.0	106.069	90.0	794.286225811	1.22246369069	C10 H10 O1	rac-2,3-Dihydro-3-methylene-1H-inden-1-ol	at 100 K	None	71-72 deg.C	colorless	None	None	None	None	J.Cvengros, J.Schutte, N.Schlorer, J.Neudorfl, H.-G.Schmalz
GULFID	RACEMIC	NC_ND_NI	Strict definition of kryptoracemate	KRYPTORACEMIC	NO	P21	4	TRUE	FALSE	5.29	2	1	4	['C']	4	0	2	2	0	[[(1, 'SS'), (1, 'RR')]]	[2]	[2]	['racemic']	['C1']	2	2.0	4.0	RAC-1	contains following chiral atom(s)C	NA	8.0723	26.531	16.356	90.0	92.325	90.0	3500.01859796	1.22733086094	C38 H38 N4 O6	dl-2,3-bis(N-((3,4-dimethoxybenzyl)oxy)ethanimidoyl)-2,3-diphenylsuccinonitrile	at 294 K	None	142-143 deg.C	None	None	None	None	None	Yunfei Du, Yongliang Zhang, Songqing Wang, Kang Zhao
GUMCEY	RACEMIC	NC_ND_NI	Strict definition of kryptoracemate + achiral molecule	KRYPTORACEMIC	NO	P1	1	TRUE	FALSE	2.71	2	1	8	['C']	8	6	4	4	0	[[(1, 'RSRS'), (1, 'SRSR')]]	[2]	[2]	['racemic']	['C1']	3	2.0	2.0	RAC-1	contains following chiral atom(s)C	NA	7.3829	9.9311	16.9977	89.569	78.232	71.925	1157.78896213	1.44972809428	C25 H21 Br1 N2 O2,0.5(C4 H8 O2)	3'-acetyl-6-bromo-4',5'-diphenylspiro[indole-3,2'-pyrrolidin]-2(1H)-one ethyl acetate	at 120 K	None	None	colorless	None	None	None	None	Chuqin Peng, Jiwei Ren, Jun-An Xiao, Honggang Zhang, Hua Yang, Yiming Luo
GUXCEJ	RACEMIC	NC_ND_NI	Strict definition of kryptoracemate	KRYPTORACEMIC	NO	P212121	19	TRUE	FALSE	3.64	2	1	6	['C']	6	6	3	3	0	[[(1, 'RRR'), (1, 'SSS')]]	[2]	[2]	['racemic']	['C1']	2	2.0	8.0	RAC-1	contains following chiral atom(s)C	NA	9.8946	13.0231	27.7287	90.0	90.0	90.0	3573.07495278	1.29911355373	C22 H23 N1 O3	benzyl 5-oxo-2-phenyloctahydro-1H-indole-1-carboxylate	100 K	None	None	colorless	None	None	None	None	M.H.Shaw, N.G.McCreanor, W.G.Whittingham, J.F.Bower
HACKOO	RACEMIC	NC_ND_NI	Contains also at least an other enantiomer in enantiopure proportion	KRYPTORACEMIC	NO	P1	1	TRUE	FALSE	5.93	4	2	4	['C']	4	2	1	3	0	[[(1, 'S'), (1, 'R')], [(2, 'S')]]	[2, 1]	[2, 2]	['racemic', 'chiral']	['C1']	4	2.0	2.0	Wa-could be Diast	contains following chiral atom(s)C	NA	13.2663	14.226	15.0088	68.446	63.857	73.509	2339.58479995	1.285879548	C40 H51 Cl2 N5 O9,C3 H7 N1 O2	6-chloro-8-(((4-chlorophenyl)carbamoyl)amino)-N2,4,4-trimethyl-N'2-(3-(1,4,7,10,13-pentaoxa-16-azacyclooctadecan-16-ylmethyl)phenyl)-chromane-2,2-dicarboxamide L-alanine	298 K	None	None	colorless	None	None	None	None	O.H.Rubio, R.Taouil, F.M.Muniz, L.M.Monleon, L.Simon, F.Sanz, J.R.Moran
HAJNOY	RACEMIC	NC_ND_NI	Strict definition of kryptoracemate	KRYPTORACEMIC	NO	P21	4	TRUE	FALSE	2.89	2	1	4	['C']	4	4	2	2	0	[[(1, 'SS'), (1, 'RR')]]	[2]	[2]	['racemic']	['C1']	2	2.0	4.0	RAC-1	contains following chiral atom(s)C	NA	11.4261	8.1847	16.8243	90.0	93.067	90.0	1571.14143831	1.30812249557	C19 H19 N1 O1 S1	(9RS,15RS)-9-ethyl-11-methyl-9,13b-dihydrodibenzo[c,f]thiazolo[3,2-a]azepin-3(2H)-one	100 K	None	None	colorless	None	None	None	None	J.B.Mateus-Ruiz, L.M.Acosta Quintero, A.Palma, M.A.Macias, J.Cobo, C.Glidewell
HANBOP	RACEMIC	NC_ND_NI	Strict definition of kryptoracemate	KRYPTORACEMIC	NO	P21	4	TRUE	FALSE	4.41	2	1	6	['C']	6	6	3	3	0	[[(1, 'SRS'), (1, 'RSR')]]	[2]	[2]	['racemic']	['C1']	2	2.0	4.0	RAC-1	contains following chiral atom(s)C	NA	13.0437	10.0852	15.9272	90.0	101.757	90.0	2051.24045935	1.32593992376	C26 H23 N3 O2	8-Benzyl-10-phenyl-8,8a,11a,11b-tetrahydro-6H-pyrrolo[3',4':3,4]pyrazolo[5,1-a]isoquinoline-9,11(5H,10H)-dione	at 100 K	None	None	colorless	None	None	None	None	H.D.S.Guerrand, H.Adams, I.Coldham
HAPTIE	RACEMIC	NC_D_I	Contains at least 2 different chemicals in racemic proportions	KRYPTORACEMIC	NO	P21	4	TRUE	TRUE	5.96	4	2	4	['C']	4	2	2	2	0	[[(1, 'S'), (1, 'R')], [(1, 'S'), (1, 'R')]]	[2, 2]	[2, 2]	['racemic', 'racemic']	['C1']	4	2.0	4.0	RAC-1	contains following chiral atom(s)C	NA	15.3308	11.572	15.6536	90.0	97.625	90.0	2752.51852757	1.37182898256	C24 H30 Cl2 N3 O3 1+,C3 H5 O3 1-	1-{[6-chloro-8-{[(4-chlorophenyl)carbamoyl]amino}-2-(hydroxymethyl)-4,4-dimethyl-3,4-dihydro-2H-1-benzopyran-2-yl]methyl}pyrrolidin-1-ium (L)-lactate	298 K	None	None	colorless	None	None	None	None	O.H.Rubio, S.del Mazo, L.M.Monleon, L.Simon, A.G.Temprano, J.R.Moran
HAPTOK	RACEMIC	NC_ND_I	Contains also at least an other enantiomer in enantiopure proportion + achiral molecule	KRYPTORACEMIC	NO	C2	5	TRUE	FALSE	7.24	3	2	4	['C']	4	2	3	1	0	[[(1, 'RR')], [(1, 'S'), (1, 'R')]]	[1, 2]	[1, 2]	['chiral', 'racemic']	['C1']	5	2.0	8.0	RAC-1	contains following chiral atom(s)C	NA	17.4116	19.0364	17.372	90.0	97.836	90.0	5704.25578766	1.33086024463	C24 H30 Cl2 N3 O3 1+,0.5(C4 H4 O6 2-),0.5(H2 O1)	1-{[6-chloro-8-{[(4-chlorophenyl)carbamoyl]amino}-2-(hydroxymethyl)-4,4-dimethyl-3,4-dihydro-2H-1-benzopyran-2-yl]methyl}pyrrolidin-1-ium hemikis((L)-tartrate) hemihydrate	298 K	None	None	colorless	None	None	None	None	O.H.Rubio, S.del Mazo, L.M.Monleon, L.Simon, A.G.Temprano, J.R.Moran
HAPVAY	RACEMIC	NC_ND_I	Contains also at least an other enantiomer in enantiopure proportion	KRYPTORACEMIC	NO	P212121	19	TRUE	FALSE	10.55	4	2	4	['C']	4	2	1	3	0	[[(2, 'S')], [(1, 'S'), (1, 'R')]]	[1, 2]	[2, 2]	['chiral', 'racemic']	['C1']	4	2.0	8.0	RAC-1	contains following chiral atom(s)C	NA	10.7729	23.4747	28.9321	90.0	90.0	90.0	7316.65600183	1.3103175701	C24 H30 Cl2 N3 O3 1+,C10 H12 N1 O4 S1 1-	1-{[6-chloro-8-{[(4-chlorophenyl)carbamoyl]amino}-2-(hydroxymethyl)-4,4-dimethyl-3,4-dihydro-2H-1-benzopyran-2-yl]methyl}pyrrolidin-1-ium N-tosyl-(L)-alaninate	298 K	None	None	colorless	None	None	None	None	O.H.Rubio, S.del Mazo, L.M.Monleon, L.Simon, A.G.Temprano, J.R.Moran
HEFGIL	RACEMIC	NC_ND_NI	Strict definition of kryptoracemate	KRYPTORACEMIC	NO	P21	4	TRUE	FALSE	6.32	2	1	8	['C']	8	6	4	4	0	[[(1, 'RSRR'), (1, 'SRSS')]]	[2]	[2]	['racemic']	['C1']	2	2.0	4.0	RAC-1	contains following chiral atom(s)C	NA	10.17362	9.94225	17.93723	90.0	94.8839	90.0	1807.73966799	1.4269726701	C20 H20 O8	trimethyl 1-(oxiran-2-yl)-8-oxo-1,2,3a,8-tetrahydrocyclopenta[a]indene-3,3,8a-tricarboxylate	100 K	None	None	colorless	None	None	None	None	Jiantao Zhang, Huanfeng Jiang, Shifa Zhu
HEGSAP	RACEMIC	NC_ND_NI	Strict definition of kryptoracemate	KRYPTORACEMIC	NO	P21	4	TRUE	FALSE	4.05	2	1	2	['C']	2	2	1	1	0	[[(1, 'S'), (1, 'R')]]	[2]	[2]	['racemic']	['C1']	2	2.0	4.0	RAC-1	contains following chiral atom(s)C	NA	11.5348	10.7628	15.0222	90.0	92.431	90.0	1863.2788281	1.2543285085	C22 H22 Cl1 N1 O1	2-((4-Chlorophenyl)(piperidin-1-yl)methyl)-1-naphthol	at 296 K	None	None	colorless	None	None	None	None	C.Mukhopadhyay, S.Rana, R.J.Butcher
HEPNAU	RACEMIC	NC_ND_NI	Strict definition of kryptoracemate	KRYPTORACEMIC	NO	P21212	18	TRUE	FALSE	5.45	2	1	4	['C']	4	4	2	2	0	[[(1, 'SS'), (1, 'RR')]]	[2]	[2]	['racemic']	['C2']	2	1.0	4.0	RAC-1	contains following chiral atom(s)C	NA	15.6392	18.6933	10.3357	90.0	90.0	90.0	3021.6238836	2.75497507734	C36 H30 F4 N4 O2	(4R*,4'R*)-5,5'-bis(bis(4-fluorophenyl)methylene)-1,1',3,3'-tetramethyl-[4,4'-biimidazolidine]-2,2'-dione	298 K	None	488-489 K	colorless	None	None	None	None	N.Kise, Shuta Goi, T.Sakurai
HEQRAY	RACEMIC	NC_ND_NI	Strict definition of kryptoracemate	KRYPTORACEMIC	NO	P21	4	TRUE	FALSE	3.87	2	1	6	['C']	6	6	3	3	0	[[(1, 'RRR'), (1, 'SSS')]]	[2]	[2]	['racemic']	['C1']	2	2.0	4.0	RAC-1	contains following chiral atom(s)C	NA	10.628	18.617	12.955	90.0	105.512	90.0	2469.92600628	1.32189377113	C28 H30 N2 O6	Methyl 1-(2-methoxy-2-oxoethyl)-2,5-bis(4-methoxyphenyl)-3-phenylimidazolidine-4-carboxylate	at 100 K	None	None	colorless	None	None	None	In both of the independent molecules, there is an NH proton in a calculated position. This would cause the molecule to be charged but there are no anions in the structure. We have, therefore, suppressed these protons to give a neutral structure	S.P.Swain, Yi-Chun Shih, Shwu-Chen Tsay, J.Jacob, Chun-Cheng Lin, Kuo Chu Hwang, Jia-Cherng Horng, Jih Ru Hwu
HEQREC	RACEMIC	NC_ND_NI	Strict definition of kryptoracemate	KRYPTORACEMIC	NO	P21	4	TRUE	FALSE	3.03	4	1	12	['C']	12	12	6	6	0	[[(2, 'RRS'), (2, 'SSR')]]	[2]	[4]	['racemic']	['C1']	4	4.0	8.0	RAC-2	contains following chiral atom(s)C	NA	11.6918	14.856	21.46	90.0	90.76	90.0	3727.13203904	1.45521802943	C19 H22 Br1 N1 O4	(2RS,3aRS,8aSR)-ethyl 1-(4-bromobenzoyl)-4-oxodecahydrocyclohepta[b]pyrrole-2-carboxylate	at 295 K	None	None	colorless	None	None	None	None	D.S.Belov, E.R.Lukyanenko, A.V.Kurkin, V.B.Rybakov
HEQVAC	RACEMIC	NC_ND_NI	Strict definition of kryptoracemate	KRYPTORACEMIC	NO	P212121	19	TRUE	FALSE	4.1	2	1	6	['C']	6	6	3	3	0	[[(1, 'SRR'), (1, 'RSS')]]	[2]	[2]	['racemic']	['C1']	2	2.0	8.0	RAC-1	contains following chiral atom(s)C	NA	10.175	23.605	24.7146	90.0	90.0	90.0	5935.97425327	1.31724305129	C30 H36 O12	Dimethyl 2-(((1RS,2SR,3SR)-3-(3,4-dimethoxyphenyl)-5,6-dimethoxy-2-[2-methoxy-1-(methoxycarbonyl)-2-oxoethyl]-2,3-dihydro-1H-inden-1-yl)methyl)malonate	at 295 K	None	None	colorless	None	None	None	None	A.O.Chagarovskiy, E.M.Budynina, O.A.Ivanova, I.V.Trushkov, M.Ya.Melnikov, V.B.Rybakov
HEYROS	RACEMIC	NC_ND_NI	Strict definition of kryptoracemate	KRYPTORACEMIC	NO	P212121	19	TRUE	FALSE	5.4	2	1	2	['C']	2	2	1	1	0	[[(1, 'S'), (1, 'R')]]	[2]	[2]	['racemic']	['C1']	2	2.0	8.0	RAC-1	contains following chiral atom(s)C	NA	23.44	14.164	11.125	90.0	90.0	90.0	3693.54628	1.3897224459	C24 H18 O5	2-(8-Formyl-1-hydroxy-4-methoxy-2-naphthyl)-6-methoxynaphtho(1,8-bc)furan	None	None	186-187deg.C	deep red	None	None	None	None	J.-P.Buisson, J.Kotzyba, J.-P.Lievremont, P.Demerseman, N.Platzer, J.-P.Bideau, M.Cotrait
HIDJUB	RACEMIC	NC_D_I	Contains also at least an other enantiomer in enantiopure proportion + achiral molecule	KRYPTORACEMIC	NO	P21	4	TRUE	TRUE	8.28	4	2	16	['C' 'N']	14	14	5	11	0	[[(2, 'SRSSSSR')], [(1, 'S'), (1, 'R')]]	[1, 2]	[2, 2]	['chiral', 'racemic']	['C1']	8	2.0	4.0	RAC-1	contains following chiral atom(s)C,N	NA	12.144	7.893	34.093	90.0	90.63	90.0	3267.70487201	1.41624487644	C23 H27 N2 O4 1+,0.55(C10 H9 N2 O5 1-),0.45(C10 H9 N2 O5 1-),2(C1 H4 O1)	Brucinium (N-(3-nitrobenzoyl)-D-alaninate N-(3-nitrobenzoy)-L-alaninate) methanol solvate	at 100 K	None	None	pale yellow	None	None	None	None	A.Bialonska, Z.Ciunik
HIGGEL	RACEMIC	NC_ND_NI	Strict definition of kryptoracemate	KRYPTORACEMIC	NO	P1	1	TRUE	FALSE	5.09	2	1	2	['C']	2	2	1	1	0	[[(1, 'S'), (1, 'R')]]	[2]	[2]	['racemic']	['C1']	2	2.0	2.0	RAC-1	contains following chiral atom(s)C	NA	9.6086	11.3986	14.7124	89.194	83.704	73.888	1538.51357415	1.35877322954	C28 H24 I1 N1 O6 S1	Dimethyl 5-iodo-1-((4-methylphenyl)sulfonyl)-4,6-diphenyl-1,6-dihydropyridine-2,3-dicarboxylate	at 296 K	None	None	colorless	None	None	None	None	Xiaoyi Xin, Dongping Wang, Fan Wu, Xincheng Li, Boshun Wan
HIJBIM	RACEMIC	NC_ND_I	Strict definition of kryptoracemate + achiral molecule	KRYPTORACEMIC	NO	P21	4	TRUE	FALSE	2.38	2	1	10	['C' 'N']	8	8	5	5	0	[[(1, 'SRSRS'), (1, 'RSRSR')]]	[2]	[2]	['racemic']	['C1']	4	2.0	4.0	RAC-1	contains following chiral atom(s)C,N	NA	9.502	16.028	12.906	90.0	98.432	90.0	1944.31218178	1.46483075006	C20 H27 Br1 N1 O2 1+,Cl1 1-	2-(((4-Bromobenzoyl)oxy)methyl)-6a-ethyldecahydrocyclopenta(hi)indolizinium chloride	at 150 K	None	None	colorless	None	None	None	None	I.Coldham, A.J.M.Burrell, L.E.White, H.Adams, N.Oram
HILXUW	RACEMIC	NC_ND_NI	Strict definition of kryptoracemate	KRYPTORACEMIC	NO	P21	4	TRUE	FALSE	5.9	2	1	8	['C']	8	6	4	4	0	[[(1, 'SRSS'), (1, 'RSRR')]]	[2]	[2]	['racemic']	['C1']	2	2.0	4.0	RAC-1	contains following chiral atom(s)C	NA	7.1694	30.924	8.1543	90.0	102.622	90.0	1764.17080396	1.25558872799	C19 H27 N1 O2 S1	6a-Ethyl-1-(phenylsulfonyl)decahydro-4H-pyrrolo(3,2,1-ij)quinoline	at 150 K	None	117-119 deg.C	colorless	None	None	dichloromethane	None	I.Coldham, A.J.M.Burrell, L.E.White, H.Adams, N.Oram
HISGOH	RACEMIC	NC_ND_NI	Strict definition of kryptoracemate	KRYPTORACEMIC	NO	P21	4	TRUE	FALSE	2.91	2	1	2	['C']	2	2	1	1	0	[[(1, 'S'), (1, 'R')]]	[2]	[2]	['racemic']	['C1']	2	2.0	4.0	RAC-1	contains following chiral atom(s)C	NA	10.0155	12.2702	17.6705	90.0	98.496	90.0	2147.73603091	1.18902691029	C28 H20 N2	2,3-Diphenyl-4-(phenylethynyl)-3,4-dihydroquinazoline	at 294 K	None	None	colorless	None	None	None	None	R.Arun Kumar, G.Saidulu, B.Sridhar, Shiuh Tzung Liu, K.Rajender Reddy
HISRIL01	RACEMIC	NC_ND_NI	Strict definition of kryptoracemate	KRYPTORACEMIC	NO	I2	5	TRUE	FALSE	6.0	2	1	2	['C']	2	2	1	1	0	[[(1, 'S'), (1, 'R')]]	[2]	[2]	['racemic']	['C1']	2	2.0	8.0	RAC-1	contains following chiral atom(s)C	NA	22.7505	5.6498	86.746	90.0	93.968	90.0	11123.2362375	0.997668694917	C53 H102 O6	1-stearoyl-2,3-dipalmitoylglycerol	at 297 K	None	332 K	white	beta'!1$-2 polymorph	None	None	None	J.B.van Mechelen, R.Peschar, H.Schenk
HOBMAO	RACEMIC	NC_ND_NI	Strict definition of kryptoracemate + achiral molecule	KRYPTORACEMIC	NO	I41	80	TRUE	FALSE	7.42	2	1	2	['C']	2	2	1	1	0	[[(1, 'S'), (1, 'R')]]	[2]	[2]	['racemic']	['C1']	3	2.0	16.0	RAC-1	contains following chiral atom(s)C	NA	31.306	31.306	5.5825	90.0	90.0	90.0	5471.21641297	1.24668522448	C14 H14 Cl1 N1 O1,0.5(H2 O1)	2-((4-Chlorophenyl)amino)-2-phenylethanol hemihydrate	at 296 K	None	None	None	None	None	None	None	A.Kumar, R.Parella, S.A.Babu
HOCKUI	RACEMIC	NC_ND_NI	Strict definition of kryptoracemate	KRYPTORACEMIC	NO	P21	4	TRUE	FALSE	8.62	2	1	4	['C']	4	4	2	2	0	[[(1, 'SS'), (1, 'RR')]]	[2]	[2]	['racemic']	['C1']	2	2.0	4.0	RAC-1	contains following chiral atom(s)C	NA	11.7663	10.1141	17.408	90.0	103.573	90.0	2013.79073528	1.7124575278	C20 H17 Br2 N5 O2	1,1'-[2,6-bis(4-bromophenyl)-2,3,6,7,9-penta-azabicyclo[3.3.1]nona-3,7-diene-4,8-diyl]bis(ethan-1-one)	293 K	None	None	colorless	None	None	None	None	H.M.Al-Matar, K.M.Dawood, W.M.Tohamy, M.A.Shalaby
HOFNEY	RACEMIC	NC_ND_NI	Strict definition of kryptoracemate	KRYPTORACEMIC	NO	P212121	19	TRUE	FALSE	3.9	2	1	6	['C']	6	6	3	3	0	[[(1, 'RRS'), (1, 'SSR')]]	[2]	[2]	['racemic']	['C1']	2	2.0	8.0	RAC-1	contains following chiral atom(s)C	NA	9.3365	18.189	22.546	90.0	90.0	90.0	3828.79775978	1.34420792546	C24 H21 N1 O4	methyl 12-benzyl-12,13-dihydro-6H-6,13-methanodibenzo[d,h][1,3,6]dioxazonine-14-carboxylate	123 K	None	None	colorless	None	None	None	None	N.Ido, K.Mori
HOKRAC	RACEMIC	NC_ND_NI	Strict definition of kryptoracemate	KRYPTORACEMIC	NO	P21	4	TRUE	FALSE	4.68	2	1	8	['C']	8	4	4	4	0	[[(1, 'RSRS'), (1, 'SRSR')]]	[2]	[2]	['racemic']	['C1']	2	2.0	4.0	RAC-1	contains following chiral atom(s)C	NA	7.173	13.9663	11.3205	90.0	90.831	90.0	1133.97146558	1.36053030537	C14 H16 O3	15-oxatetracyclo[8.2.2.12,9.02,9]pentadec-13-ene-11,12-dione	at 130 K	None	394-395 K	yellow	None	None	ethyl acetate/petroleum ether	None	J.M.White, R.Y.W.Goh
HONFIA	RACEMIC	NC_ND_NI	Strict definition of kryptoracemate	KRYPTORACEMIC	NO	P21	4	TRUE	FALSE	4.65	2	1	2	['C']	2	2	1	1	0	[[(1, 'S'), (1, 'R')]]	[2]	[2]	['racemic']	['C1']	2	2.0	4.0	RAC-1	contains following chiral atom(s)C	NA	11.4599	8.2053	14.7752	90.0	92.142	90.0	1388.36960492	1.30765479397	C18 H15 N3	dicyano(5,5-dimethyl-5,6-dihydrophenanthridinium-6-yl)methanide	at 120 K	None	None	colorless	None	None	None	None	J.O'Leary, J.D.Wallis
HONXEQ	RACEMIC	NC_ND_NI	Strict definition of kryptoracemate	KRYPTORACEMIC	NO	P212121	19	TRUE	FALSE	3.81	2	1	2	['C']	2	2	1	1	0	[[(1, 'S'), (1, 'R')]]	[2]	[2]	['racemic']	['C1']	2	2.0	8.0	RAC-1	contains following chiral atom(s)C	NA	9.0084	13.2469	21.3617	90.0	90.0	90.0	2549.16373452	1.30947783042	C16 H13 N1 O2	2-methyl-4-phenylisoquinoline-1,3(2H,4H)-dione	100.0 K	None	None	None	None	None	None	None	A.Golushko, D.Darin, G.Kantin, N.Guranova, A.V.Vasilyev, M.Krasavin
HONZES	RACEMIC	NC_ND_NI	Strict definition of kryptoracemate	KRYPTORACEMIC	NO	C2	5	TRUE	FALSE	11.73	2	1	2	['C']	2	2	1	1	0	[[(1, 'S'), (1, 'R')]]	[2]	[2]	['racemic']	['C1']	2	2.0	8.0	RAC-1	contains following chiral atom(s)C	NA	14.673	14.279	26.056	90.0	106.35	90.0	5238.37508164	1.37055782024	C30 H26 Br1 N3 O2	{4-[3-(4-bromophenyl)-5-(naphthalen-1-yl)-4,5-dihydro-1H-pyrazol-1-yl]phenyl}(morpholin-4-yl)methanone	273 K	None	None	None	None	None	None	None	Xiao-Qiang Yan, Zhong-Chang Wang, Peng-fei Qi, Guigen Li, Hai-Liang Zhu
HOVDAY	RACEMIC	NC_ND_NI	Contains also at least an other enantiomer in enantiopure proportion	KRYPTORACEMIC	NO	P1	1	TRUE	FALSE	4.59	3	2	4	['C']	4	4	1	3	0	[[(1, 'SS')], [(1, 'S'), (1, 'R')]]	[1, 2]	[1, 2]	['chiral', 'racemic']	['C1']	3	1.0	1.0	RAC-1	contains following chiral atom(s)C	NA	8.206	12.1472	14.457	105.296	105.248	92.646	1330.71316879	1.32911638392	2(C20 H21 N1 O4),C20 H18 O8	bis((-)-5,8,13,13a-Tetrahydro-9,10-dimethoxy-2,3-methylenedioxy-6H-dibenzo(a,g)quinolizine) (+)-2,3-bis(((4-methylphenyl)carbonyl)oxy)butanedioic acid	at 273 K	None	158-159 deg.C	colorless	None	None	methanol	None	Jing-Ming Gao, Wei-Tao Liu, Man-Lin Li, Han-Wei Liu, Xing-Chang Zhang, Zong-Xiao Li
HURBUT	RACEMIC	NC_ND_NI	Strict definition of kryptoracemate	KRYPTORACEMIC	NO	P1	1	TRUE	FALSE	6.94	4	1	12	['P']	0	0	6	6	0	[[(2, 'SRR'), (2, 'RSS')]]	[2]	[4]	['racemic']	['C1']	4	4.0	4.0	RAC-2	contains following chiral atom(s)P	NA	10.3101	14.4675	16.903	107.088	90.587	107.023	2291.56626943	1.76268041102	C13 H20 Cl2 F6 N3 O7 P3	15,17-dichloro-20,20,21,21,22,22-hexafluoro-2,5,8,11,14,18,24-heptaoxa-16,25,26-triaza-1,15,17-triphosphatricyclo[13.9.1.11,17]hexacosa-1(26),15(25),16-triene	120 K	None	None	colorless	None	None	None	None	C.Mutlu, S.Besli, F.Yuksel
HUXHOX	RACEMIC	NC_ND_NI	Strict definition of kryptoracemate	KRYPTORACEMIC	NO	P212121	19	TRUE	FALSE	3.98	2	1	8	['C']	8	8	4	4	0	[[(1, 'RSSR'), (1, 'SRRS')]]	[2]	[2]	['racemic']	['C1']	2	2.0	8.0	RAC-1	contains following chiral atom(s)C	NA	7.0505	15.705	29.235	90.0	90.0	90.0	3237.13607659	1.22868052247	C19 H25 N1 O2	2R*-morpholino-4S*-phenylbicyclo[3.3.1]nonan-9-one	at 293 K	None	135-140deg.C	colorless	None	None	None	None	D.Diez, M.Parra, S.G.San Feliciano, I.S.Marcos, N.M.Garrido, P.Basabe, A.Jimenez, H.B.Broughton, J.G.Urones
HUYBIN	RACEMIC	NC_ND_NI	Strict definition of kryptoracemate	KRYPTORACEMIC	NO	P212121	19	TRUE	FALSE	7.38	8	1	8	['C']	8	8	4	4	0	[[(4, 'S'), (4, 'R')]]	[2]	[8]	['racemic']	['C1']	8	8.0	32.0	RAC-2	contains following chiral atom(s)C	NA	8.266	26.272	31.874	90.0	90.0	90.0	6921.89655565	1.20702789352	C7 H11 N1 O1 S1	2-(Methylamino)-1-(2-thienyl)ethanol	at 150 K	None	314-316 K	colorless	None	None	ethyl acetate	None	Fuqiang Ning, R.J.Anderson, D.E.Hibbs, P.W.Groundwater
IBEFIG	RACEMIC	NC_D_I	Strict definition of kryptoracemate + achiral molecule	KRYPTORACEMIC	NO	P1	1	TRUE	TRUE	5.85	2	1	2	['Te']	0	0	1	1	0	[[(1, 'S'), (1, 'R')]]	[2]	[2]	['racemic']	['C1']	4	2.0	2.0	RAC-1	contains following chiral atom(s)Te	NA	8.468	8.927	19.089	102.77	96.82	95.65	1385.72577882	2.39098604502	C24 H18 I1 N4 Te1 1+,I3 1-	iodo-bis(phenyldiazenylphenyl)-tellurium triiodide	at 110 K	None	None	red purple	None	None	None	None	K.Srivastava, P.Shah, H.B.Singh, R.J.Butcher
IBIBON	RACEMIC	NC_ND_NI	Strict definition of kryptoracemate	KRYPTORACEMIC	NO	P212121	19	TRUE	FALSE	3.66	2	1	2	['C']	2	2	1	1	0	[[(1, 'S'), (1, 'R')]]	[2]	[2]	['racemic']	['C1']	2	2.0	8.0	RAC-1	contains following chiral atom(s)C	NA	7.2845	21.6455	15.9651	90.0	90.0	90.0	2517.3234011	1.28393378408	C15 H17 N1 O2	N-(methoxy(2-methoxyphenyl)methyl)aniline	100 K	None	None	white	None	None	Methanol	None	Tuhin Khan, Shefali Vaidya
IBIFOP	RACEMIC	NC_ND_NI	Strict definition of kryptoracemate	KRYPTORACEMIC	NO	P1	1	TRUE	FALSE	11.4	2	1	4	['C']	4	2	2	2	0	[[(1, 'SR'), (1, 'RS')]]	[2]	[2]	['racemic']	['C1']	2	2.0	2.0	RAC-1	contains following chiral atom(s)C	NA	8.27	12.122	8.071	105.18	97.32	72.81	744.897125252	1.4501313941	C13 H15 F4 N1 O4	erythro-N-Methoxy-N-methyl-2-fluoro-3-hydroxy-3-(4-methoxyphenyl)-2-(trifluoromethyl)propanamide	at 25 deg.C	None	96-97 deg.C	colorless	None	None	None	None	K.Sato, S.Sekiguchi, T.Ishihara, T.Konno, H.Yamanaka
IBOMAQ	RACEMIC	NC_D_I	Strict definition of kryptoracemate + achiral molecule	KRYPTORACEMIC	NO	P1	1	TRUE	TRUE	4.59	2	1	6	['C']	6	6	3	3	0	[[(1, 'RRS'), (1, 'SSR')]]	[2]	[2]	['racemic']	['C1']	4	2.0	2.0	RAC-1	contains following chiral atom(s)C	NA	10.1294	11.7807	18.2009	87.416	89.781	88.998	2169.38906728	1.316615443	C36 H64 Cl2 N4 P1 Si2 1+,C1 F3 O3 S1 1-	dichloro-(2-{[bis(propan-2-yl)amino]methyl}-1,3-di-t-butyl-2-(3-{[2,6-bis(propan-2-yl)phenyl]amino}bicyclo[2.2.1]hept-2-en-2-yl)-4,4-dimethyl-1,3,2,4-diazaphosphasiletidin-2-ium)-silicon trifluoromethanesulfonate	193 K	None	None	colorless	None	None	None	None	I.Alvarado-Beltran, A.Baceiredo, N.Saffon-Merceron, V.Branchadell, T.Kato
IBOVEA	RACEMIC	NC_ND_NI	Strict definition of kryptoracemate	KRYPTORACEMIC	NO	P21	4	TRUE	FALSE	4.53	2	1	4	['C']	4	4	2	2	0	[[(1, 'SS'), (1, 'RR')]]	[2]	[2]	['racemic']	['C1']	2	2.0	4.0	RAC-1	contains following chiral atom(s)C	NA	10.21	15.34	11.933	90.0	109.43	90.0	1762.52311509	1.3430166859	C18 H20 N4 O4	rac-(N,N'-bis(4-Nitrophenyl)-1,2-diaminocyclohexane)	at 293 K	None	None	yellow	None	None	None	None	P.Gangopadhyay, T.P.Radhakrishnan
IDILIQ	RACEMIC	NC_ND_NI	Strict definition of kryptoracemate	KRYPTORACEMIC	NO	P21	4	TRUE	FALSE	5.98	2	1	2	['C']	2	2	1	1	0	[[(1, 'S'), (1, 'R')]]	[2]	[2]	['racemic']	['C1']	2	2.0	4.0	RAC-1	contains following chiral atom(s)C	NA	7.566	17.7842	10.2284	90.0	104.689	90.0	1331.30311747	1.31877074866	C16 H16 N4	1-(2-Methyl-2,3-dihydroindol-1-ylmethyl)-1H-benzotriazole	at 120.0 K	None	343K	colorless	None	None	ethanol	None	J.N.Low, J.Cobo, M.Nogueras, A.Sanchez, R.Abonia, A.Albornoz
IFADOL	RACEMIC	NC_ND_NI	Strict definition of kryptoracemate	KRYPTORACEMIC	NO	C1	1	TRUE	FALSE	5.13	2	1	2	['C']	2	2	1	1	0	[[(1, 'S'), (1, 'R')]]	[2]	[2]	['racemic']	['C1']	2	2.0	4.0	RAC-1	contains following chiral atom(s)C	NA	21.7483	9.205	13.1074	90.0	123.852	90.0	2179.1867339	1.20846471875	C23 H28 N2 O4	ethyl 3-[3-butyl-2-(2-hydroxyphenyl)-4-oxo-3,4-dihydroquinazolin-1(2H)-yl]propanoate	296 K	None	None	None	None	None	None	None	R.Akula, V.Murthy, S.Nikumbh, K.Tadiparthi, V.Lakinani
IGAREO	RACEMIC	NC_ND_NI	Strict definition of kryptoracemate	KRYPTORACEMIC	NO	P21	4	TRUE	FALSE	4.18	2	1	2	['C']	2	2	1	1	0	[[(1, 'S'), (1, 'R')]]	[2]	[2]	['racemic']	['C1']	2	2.0	4.0	RAC-1	contains following chiral atom(s)C	NA	11.379	10.5993	11.9596	90.0	108.225	90.0	1370.0815426	1.42211659381	C13 H15 N3 O3 S1	N-(4-Acetyl-5-(3-methoxyphenyl)-4,5-dihydro-1,3,4-thiadiazol-2-yl)acetamide	at 293 K	None	None	colorless	None	None	ethanol	None	G.Aridoss, S.Amirthaganesan, D.Velmurugan, S.H.Kim, Y.T.Jeong
IHEMEO	RACEMIC	NC_ND_NI	Strict definition of kryptoracemate	KRYPTORACEMIC	NO	P1	1	TRUE	FALSE	6.95	2	1	2	['C']	2	2	1	1	0	[[(1, 'S'), (1, 'R')]]	[2]	[2]	['racemic']	['C1']	2	2.0	2.0	RAC-1	contains following chiral atom(s)C	NA	4.4128	11.96	13.732	76.171	84.726	81.194	694.275180161	1.3121953772	C18 H14 N2 O1	(Z)-5-Benzylidene-5,7-dihydro-7-phenylimidazo[1,2-c]oxazole	at 153 K	None	107.8 deg.C	None	None	None	ethyl acetate/hexane	None	C.Laroche, S.M.Kerwin
IHULUU	RACEMIC	NC_ND_NI	Strict definition of kryptoracemate	KRYPTORACEMIC	NO	P1	1	TRUE	FALSE	4.06	2	1	2	['C']	2	2	1	1	0	[[(1, 'S'), (1, 'R')]]	[2]	[2]	['racemic']	['C1']	2	2.0	2.0	RAC-1	contains following chiral atom(s)C	NA	6.3305	7.859	10.7001	86.895	83.042	80.99	521.567734186	1.70087189139	C12 H11 Br1 O2	5'-bromo-3'-hydroxyspiro[cyclobutane-1,2'-inden]-1'(3'H)-one	293 K	None	None	colorless	None	None	None	None	Tanmoy Chanda, Sushobhan Chowdhury, N.Anand, S.Koley, Ashutosh Gupta, Maya Shankar Singh
INUBOK	SCALEMIC	NC_ND_NI	Unbalanced Kryptoracemate	KRYPTORACEMIC	NO	P1	1	TRUE	FALSE	5.74	3	1	3	['C']	3	3	1	2	0	[[(2, 'S'), (1, 'R')]]	[2]	[3]	['scalemic']	['C1']	3	3.0	3.0	scal-3-attention could contain stereoisomer	contains following chiral atom(s)C	NA	7.8503	11.0271	17.767	75.302	81.673	89.125	1471.63539278	1.29114319782	C22 H23 N1 O5	2-methyl-2-(4-oxo-2-(2-oxo-2-phenylethyl)-1,3-oxazolidin-3-yl)propyl benzoate	296 K	None	None	colorless	None	None	None	None	A.El Bouakher, R.Le Goff, J.Tasserie, J.Lhoste, A.Martel, S.Comesse
IQAREY01	RACEMIC	NC_ND_NI	Strict definition of kryptoracemate	KRYPTORACEMIC	NO	P21	4	TRUE	FALSE	3.86	2	1	4	['C']	4	2	2	2	0	[[(1, 'SR'), (1, 'RS')]]	[2]	[2]	['racemic']	['C1']	2	2.0	4.0	RAC-1	contains following chiral atom(s)C	NA	8.2047	19.483	5.4849	90.0	102.3	90.0	856.647343364	1.3815802576	C10 H10 O3	9-Methyl-10,11,12-trioxatricyclo[7.2.1.02,7]dodeca-2,4,6-triene	at 213 K	None	None	colorless	II polymorph	None	None	None	D.S.Giera, L.Hennig, T.Gelbrich, C.Schneider
IQAYUW	RACEMIC	NC_ND_NI	Strict definition of kryptoracemate	KRYPTORACEMIC	NO	P212121	19	TRUE	FALSE	3.82	2	1	4	['C']	4	4	2	2	0	[[(1, 'SR'), (1, 'RS')]]	[2]	[2]	['racemic']	['C1']	2	2.0	8.0	RAC-1	contains following chiral atom(s)C	NA	10.7362	16.569	20.68	90.0	90.0	90.0	3678.7258625	1.22199985388	C20 H22 N2 O3	(R*)-N-methyl-2-((S*)-3-methyl-2-oxo-5,5-diphenyloxazolidin-4-yl)propanamide	298 K	None	488 K	colorless	None	None	None	None	N.Kise, Y.Hamada, T.Sakurai
ISEBAL	RACEMIC	NC_ND_NI	Strict definition of kryptoracemate	KRYPTORACEMIC	NO	P21	4	TRUE	FALSE	4.83	2	1	2	['C']	2	2	1	1	0	[[(1, 'S'), (1, 'R')]]	[2]	[2]	['racemic']	['C1']	2	2.0	4.0	RAC-1	contains following chiral atom(s)C	NA	7.7825	33.713	9.4309	90.0	108.491	90.0	2346.65407101	1.30628102715	C27 H27 N1 O6	ethyl 5-(4-methoxybenzoyl)-1-(2-(4-methoxyphenyl)-2-oxoethyl)-2,3-dihydro-1H-pyrrolizine-7-carboxylate	296 K	None	None	colorless	None	None	None	None	Kai-Lu Zheng, Wen-Ming Shu, Jun-Rui Ma, Yan-Dong Wu, An-Xin Wu
IVUGOW	RACEMIC	NC_ND_NI	Strict definition of kryptoracemate	KRYPTORACEMIC	NO	P1	1	TRUE	FALSE	7.82	2	1	4	['C']	4	4	2	2	0	[[(1, 'SR'), (1, 'RS')]]	[2]	[2]	['racemic']	['C1']	2	2.0	2.0	RAC-1	contains following chiral atom(s)C	NA	8.23	12.3612	12.7555	105.287	104.691	100.163	1168.9236021	1.29122242169	C27 H22 N2 O5	Ethyl N-(1,3-dioxo-1,3-dihydro-2H-isoindol-2-yl)-Î²-hydroxy-2-(phenylethynyl)phenylalaninate	at 293 K	None	None	yellow	None	None	None	None	X.Du, S.Yang, J.Yang, Y.Liu
IVUNIX	RACEMIC	NC_ND_I	Strict definition of kryptoracemate + achiral molecule	KRYPTORACEMIC	NO	P21	4	TRUE	FALSE	3.87	2	1	4	['C']	4	4	2	2	0	[[(1, 'SR'), (1, 'RS')]]	[2]	[2]	['racemic']	['C1']	4	2.0	4.0	RAC-1	contains following chiral atom(s)C	NA	5.7618	17.4809	13.7006	90.0	95.417	90.0	1373.78145908	1.33136728059	C11 H18 N1 O1 1+,C1 H3 O3 S1 1-	(+/-)-1-Hydroxy-N,N-dimethyl-1-phenylpropan-2-ylammonium methanesulfonate	at 123 K	None	None	colorless	None	None	None	None	A.R.Kennedy, C.A.Morrison, N.E.B.Briggs, W.Arbuckle
IWEKEA	RACEMIC	NC_ND_NI	Strict definition of kryptoracemate	KRYPTORACEMIC	NO	P1	1	TRUE	FALSE	5.64	4	1	16	['C']	16	16	8	8	0	[[(2, 'RSSS'), (2, 'SRRR')]]	[2]	[4]	['racemic']	['C1']	4	4.0	4.0	RAC-2	contains following chiral atom(s)C	NA	9.5478	10.3716	18.6485	90.114	98.622	91.328	1825.29776541	1.18411430236	C20 H23 N1 O3	N-(Phenyl(4-phenyltetrahydro-2H-pyran-3-yl)methyl)acetamide	at 173 K	None	249-250deg.C	colorless	None	None	None	None	V.Nair, L.Balagopal, R.Rajan, A.Deepthi, K.Mohanan, N.P.Rath
IWUNUL	RACEMIC	NC_ND_NI	Strict definition of kryptoracemate + achiral molecule	KRYPTORACEMIC	NO	P212121	19	TRUE	FALSE	9.57	2	1	8	['C']	8	8	4	4	0	[[(1, 'RSSR'), (1, 'SRRS')]]	[2]	[2]	['racemic']	['C1']	7	2.0	8.0	RAC-1	contains following chiral atom(s)C	NA	12.8527	26.751	28.722	90.0	90.0	90.0	9875.2720767	1.28527806163	C51 H28 Cl1 N5 O4,2.5(C3 H6 O1)	23-chloro-2,20,26,44-tetraoxa-22,24,51,53,57-pentaazatetradecacyclo[43.5.3.23,6.227,30.115,19.121,25.139,43.05,14.07,16.08,13.029,38.031,40.032,37.048,52]hexaconta-1(51),3,5,8,10,12,15(58),16,18,21(57),22,24,27,29,32,34,36,39(54),40,42,45,47,49,52,55,59-hexacosaene acetone solvate	173 K	None	None	colorless	None	None	None	None	Han-Xiao Wang, Shu-Zhen Hu, Zheng Meng, Ying Han, Chuan-Feng Chen
IXONEO	RACEMIC	NC_ND_I	Contains also at least an other enantiomer in enantiopure proportion	KRYPTORACEMIC	NO	P212121	19	TRUE	FALSE	6.0	4	2	4	['C']	4	2	1	3	0	[[(2, 'S')], [(1, 'S'), (1, 'R')]]	[1, 2]	[2, 2]	['chiral', 'racemic']	['C1']	4	2.0	8.0	RAC-1	contains following chiral atom(s)C	NA	9.9027	11.277	28.944	90.0	90.0	90.0	3232.25601522	1.3001765151	C9 H13 N2 O1 1+,C8 H7 O3 1-	(R)-2-hydroxy-2-phenylpropanamidinium (S)-mandelate	at 298 K	None	None	colorless	None	None	None	None	J.C.Barnes, R.Hampshire, T.J.R.Weakley
IYEBIX	RACEMIC	NC_ND_I	Strict definition of kryptoracemate + achiral molecule	KRYPTORACEMIC	NO	P21	4	TRUE	FALSE	3.28	2	1	4	['C']	4	4	2	2	0	[[(1, 'SR'), (1, 'RS')]]	[2]	[2]	['racemic']	['C1']	4	2.0	4.0	RAC-1	contains following chiral atom(s)C	NA	10.329	10.4271	10.7795	90.0	103.115	90.0	1130.68648132	1.65956521039	C4 H10 N1 O3 1+,C2 Cl3 O2 1-	DL-Threoninium trichloroacetate	at 293 K	None	None	colorless	None	None	aqueous	None	K.Rajagopal, R.D.Franklin, R.V.Krishnakumar, K.Ravikumar, S.Natarajan
IYEPAD	RACEMIC	NC_ND_NI	Strict definition of kryptoracemate	KRYPTORACEMIC	NO	P21	4	TRUE	FALSE	2.94	2	1	6	['C']	6	4	3	3	0	[[(1, 'SRS'), (1, 'RSR')]]	[2]	[2]	['racemic']	['C1']	2	2.0	4.0	RAC-1	contains following chiral atom(s)C	NA	7.0091	11.5134	14.9095	90.0	94.404	90.0	1199.62285532	1.89956307953	C10 H9 Br1 F2 O6	6-Bromo-3a-ethoxycarbonyl-4,4-difluoro-5-hydroxy-3a,4,5,7a-tetrahydro-1,3-benzodioxol-2-one	at 150 K	None	123-125 deg.C	colorless	None	None	None	None	J.Fawcett, A.C.Moralee, J.M.Percy, V.Salafia, M.A.Vincent, I.H.Hillier
IYOFIM	RACEMIC	NC_ND_NI	Strict definition of kryptoracemate	KRYPTORACEMIC	NO	P21	4	TRUE	FALSE	7.71	2	1	8	['C']	8	4	4	4	0	[[(1, 'RSSS'), (1, 'SRRR')]]	[2]	[2]	['racemic']	['C1']	2	2.0	4.0	RAC-1	contains following chiral atom(s)C	NA	9.746	13.298	15.127	90.0	106.377	90.0	1880.95144886	1.31505790521	C22 H26 Cl1 N1 O2	4-Chloro-3-ethyl-3,7,7,10-tetramethyl-16-oxo-10-azatetracyclo[6.6.1.12,6.011,15]hexadeca-1(15),8,11,13-tetraene-2-carbaldehyde	at 100 K	None	None	None	None	None	None	None	V.Bhat, V.H.Rawal
JAGQUD	RACEMIC	NC_ND_NI	Strict definition of kryptoracemate	KRYPTORACEMIC	NO	P21	4	TRUE	FALSE	6.13	2	1	8	['C']	8	8	4	4	0	[[(1, 'SSRR'), (1, 'RRSS')]]	[2]	[2]	['racemic']	['C1']	2	2.0	4.0	RAC-1	contains following chiral atom(s)C	NA	8.28	18.317	11.632	90.0	107.08	90.0	1686.35706501	1.40724629423	C17 H25 Br1 O3	(1R*,2S*,3S*,4R*)-3-Bromo-1,2,3,4,5,6,7,8,9,10,11,12,13,14-tetradecahydro-1,4-epoxy-benzocyclododecene-2-carboxylic acid	None	None	None	colorless	None	None	None	None	K.Peters, E.-M.Peters, A.Taugerbeck, W.Tochtermann
JALVUQ	SCALEMIC	NC_ND_NI	Unbalanced Kryptoracemate	KRYPTORACEMIC	NO	P212121	19	TRUE	FALSE	5.56	3	1	12	['C']	12	12	7	5	0	[[(2, 'RRSR'), (1, 'SSRS')]]	[2]	[3]	['scalemic']	['C1']	3	3.0	12.0	scal-3-attention could contain stereoisomer	contains following chiral atom(s)C	NA	10.9427	22.479	20.1385	90.0	90.0	90.0	4953.68742803	2.18774569614	C15 H12 Br4 O2	2,3,9,10-tetrabromo-4-methoxy-1,2,3,4-tetrahydroanthracen-1-ol	293 K	None	None	colorless	None	None	None	None	K.B.Akar, O.Cakmak, Tuncay Tunc
JANYON	RACEMIC	NC_ND_NI	Strict definition of kryptoracemate	KRYPTORACEMIC	NO	P21	4	TRUE	FALSE	4.97	2	1	8	['C']	8	4	4	4	0	[[(1, 'RSRS'), (1, 'SRSR')]]	[2]	[2]	['racemic']	['C1']	2	2.0	4.0	RAC-1	contains following chiral atom(s)C	NA	8.124	12.92	15.721	90.0	90.069	90.0	1650.10766312	1.27356217851	C19 H24 O4	6,8,8-Trimethyl-5-phenyl-6-(tetrahydrofuran-2-yl)-2,4-dioxabicyclo(3.3.0)octan-3-one	at 100 K	None	None	None	None	None	None	None	Liming Zhang, S.A.Kozmin
JAPDAG	RACEMIC	NC_ND_NI	Strict definition of kryptoracemate	KRYPTORACEMIC	NO	P21	4	TRUE	FALSE	4.24	2	1	6	['C']	6	4	3	3	0	[[(1, 'RRS'), (1, 'SSR')]]	[2]	[2]	['racemic']	['C1']	2	2.0	4.0	RAC-1	contains following chiral atom(s)C	NA	13.274	12.007	12.039	90.0	94.65	90.0	1912.47120814	1.37987227794	C18 H25 Br1 N2 O3	3-(4-Bromophenyl)-2,4,5-trimethylisoxazolidine-4-carboxylic acid (2,2-dimethylpropionyl)amide	at 293 K	None	None	None	None	None	None	None	M.P.Sibi, Zhihua Ma, K.Itoh, N.Prabagaran, C.P.Jasperse
JAXZIR	RACEMIC	NC_ND_NI	Strict definition of kryptoracemate	KRYPTORACEMIC	NO	P1	1	TRUE	FALSE	6.1	2	1	8	['C']	8	4	4	4	0	[[(1, 'RRSS'), (1, 'SSRR')]]	[2]	[2]	['racemic']	['C1']	2	2.0	2.0	RAC-1	contains following chiral atom(s)C	NA	9.194	10.567	9.867	106.74	101.68	99.56	872.862514758	1.19630621041	C23 H22 O1	rac-trans-(1Î±,1aÎ²,5aÎ²,6aÎ²)-1a,4,5,5a,6,6a-Hexahydro-5a-methyl-1,6a-diphenylcycloprop(a)inden-3(1H)-one	None	None	133-134deg.C	white	None	None	None	H7 deleted. Suspected misplacement	R.A.Bunce, V.L.Taylor, E.M.Holt
JAYWUE	RACEMIC	NC_ND_NI	Strict definition of kryptoracemate	KRYPTORACEMIC	NO	P21	4	TRUE	FALSE	3.66	2	1	6	['C']	6	4	3	3	0	[[(1, 'SRS'), (1, 'RSR')]]	[2]	[2]	['racemic']	['C1']	2	2.0	4.0	RAC-1	contains following chiral atom(s)C	NA	8.9452	7.6683	19.8154	90.0	91.4239	90.0	1358.80728881	1.48745734594	C16 H16 O6	5,7-dimethoxy-8-(5-methyl-3,6-dioxabicyclo[3.1.0]hexan-2-yl)-2H-1-benzopyran-2-one	100 K	None	None	colorless	None	None	None	None	Wei Li, Jun-Sheng Zhang, Jia-Luo Huang, Min-Hong Jiang, You-Kai Xu, A.Ahmed, Sheng Yin, Gui-Hua Tang
JECPEP	RACEMIC	NC_ND_NI	Strict definition of kryptoracemate + achiral molecule	KRYPTORACEMIC	NO	P21	4	TRUE	FALSE	7.28	2	1	8	['C']	8	8	4	4	0	[[(1, 'SRSR'), (1, 'RSRS')]]	[2]	[2]	['racemic']	['C1']	4	2.0	4.0	RAC-1	contains following chiral atom(s)C	NA	8.9497	42.7991	11.4651	90.0	107.31	90.0	4192.68200881	1.34503952516	C46 H44 N2 O8 S2,C1 H4 O1	N-(2-(11-(3,4-dimethoxyphenyl)-8,9-dimethoxy-5-((4-methylphenyl)sulfonyl)-5,6,11,12-tetrahydro-6,12-methanodibenzo[b,f]azocin-13-yl)phenyl)-4-methylbenzene-1-sulfonamide methanol solvate	147 K	None	188-190 deg.C	colorless	None	None	methanol/dichloromethane	None	Kam-Weng Chong, Fong-Jiao Hong, N.F.Thomas, Yun-Yee Low, T.-S.Kam
JEDYAT	RACEMIC	NC_D_I	Strict definition of kryptoracemate + achiral molecule	KRYPTORACEMIC	NO	P21	4	TRUE	TRUE	4.02	2	1	4	['C' 'P']	2	2	2	2	0	[[(1, 'SS'), (1, 'RR')]]	[2]	[2]	['racemic']	['C1']	7	1.0	2.0	RAC-1	contains following chiral atom(s)C,P	NA	7.389	18.348	10.085	90.0	103.94	90.0	1326.98972043	1.68881149881	2(C7 H12 N2 O6 P2),H3 O1 1+,Cl1 1-,3(H2 O1)	oxonium bis(N-(4-methyl-2-pyridyl)aminomethane-1,1-diphosphonic acid) chloride trihydrate	at 100 K	None	None	colorless	None	None	None	None	E.Matczak-Jon, K.Slepokura, P.Kafarski
JEFVIC	RACEMIC	NC_ND_I	Strict definition of kryptoracemate + achiral molecule	KRYPTORACEMIC	NO	P212121	19	TRUE	FALSE	10.47	2	1	2	['C']	2	2	1	1	0	[[(1, 'S'), (1, 'R')]]	[2]	[2]	['racemic']	['C1']	3	1.0	4.0	RAC-1	contains following chiral atom(s)C	NA	7.711	12.974	23.865	90.0	90.0	90.0	2387.51459661	1.33129948521	C8 H19 N2 O2 1+,C8 H8 O3,C8 H7 O3 1-	1,4-bis(2-hydroxyethyl)piperazin-1-ium hydroxy(phenyl)acetate hydroxy(phenyl)acetic acid	199 K	None	344 K	colorless	None	None	None	None	B.B.Ivanova, M.Spiteller
JEGHUB	RACEMIC	NC_ND_NI	Strict definition of kryptoracemate	KRYPTORACEMIC	NO	P1	1	TRUE	FALSE	3.72	4	1	12	['C']	12	0	6	6	0	[[(2, 'RRS'), (2, 'SSR')]]	[2]	[4]	['racemic']	['C1']	4	4.0	4.0	RAC-2	contains following chiral atom(s)C	NA	9.6159	9.7162	21.2262	102.7736	99.6112	96.8219	1881.7705283	1.23698924271	C20 H30 O5	5,9-dihydroxy-12-isopropyl-5,9-dimethyl-13-oxabicyclo[10.2.2]hexadeca-1,10-diene-6,14-dione	None	None	177-178 deg.C	None	None	None	None	None	Wei Li, Yi-Hong Zou, Man-Xi Ge, Lan-Lan Lou, Yun-Shao Xu, A.Ahmed, Yun-Yun Chen, Jun-Sheng Zhang, Gui-Hua Tang, sheng yin
JELXIH	RACEMIC	NC_ND_NI	Strict definition of kryptoracemate	KRYPTORACEMIC	NO	P21	4	TRUE	FALSE	8.6	2	1	10	['C']	10	8	5	5	0	[[(1, 'SSRSR'), (1, 'RRSRS')]]	[2]	[2]	['racemic']	['C1']	2	2.0	4.0	RAC-1	contains following chiral atom(s)C	NA	11.144	20.78	10.158	90.0	109.7	90.0	2214.63210863	1.34344047987	C22 H22 Cl1 N1 O5 S1	(2RS,3SR,5SR,6RS,1'SR)-Benzyl 3-chloro-6-(1-hydroxyethyl)-7-oxo-3-((SR)-phenylsulfinyl)-1-azabicyclo(3.2.0)heptane-2-carboxylate	None	None	141-143deg.C	None	None	None	None	None	J.H.Bateson, P.M.Roberts, T.C.Smale, R.Southgate
JERGOD	RACEMIC	NC_ND_NI	Strict definition of kryptoracemate	KRYPTORACEMIC	NO	P21	4	TRUE	FALSE	7.93	2	1	2	['C']	2	2	1	1	0	[[(1, 'S'), (1, 'R')]]	[2]	[2]	['racemic']	['C1']	2	2.0	4.0	RAC-1	contains following chiral atom(s)C	NA	6.4436	16.4383	15.3404	90.0	98.536	90.0	1606.8840772	1.17147998199	C19 H25 N1 O1	2-((1-(1-Adamantyl)ethyl)iminomethyl)phenol	at 293 K	None	None	yellow	None	None	None	None	Xia Shi, Zhong-Xia Lu, Guo-Liang Zhao
JIPJOI	RACEMIC	NC_ND_NI	Strict definition of kryptoracemate	KRYPTORACEMIC	NO	P212121	19	TRUE	FALSE	4.7	2	1	2	['C']	2	2	1	1	0	[[(1, 'S'), (1, 'R')]]	[2]	[2]	['racemic']	['C1']	2	2.0	8.0	RAC-1	contains following chiral atom(s)C	NA	6.4048	11.632	35.47	90.0	90.0	90.0	2642.53747379	1.40435006148	C17 H13 N1 O1 S1	1-(Phenylthio)-1,2-dihydro-3H-pyrrolo(1,2-a)indol-3-one	at 150 K	None	None	brown-yellow	None	None	None	None	R.Tyas, H.McNab, S.Parsons
JISREI	RACEMIC	NC_D_I	Strict definition of kryptoracemate + achiral molecule	KRYPTORACEMIC	NO	P1	1	TRUE	TRUE	3.86	2	1	2	['C']	2	2	1	1	0	[[(1, 'S'), (1, 'R')]]	[2]	[2]	['racemic']	['C1']	4	2.0	2.0	RAC-1	contains following chiral atom(s)C	NA	9.917	15.248	8.502	98.26	92.27	71.13	1203.8766975	1.38768909808	C16 H27 N2 O4 1+,C6 H4 Cl1 O3 S1 1-	S-(+)-(2-(4-(3-Ethoxy-2-hydroxypropoxy)phenylcarbamoyl)ethyl)dimethylammonium p-chlorobenzenesulfonate	None	None	None	colorless	None	None	2-propanol	None	R.Tamura, H.Takahashi, K.Hirotsu, Y.Nakajima, T.Ushio, F.Toda
JOBLOB	RACEMIC	NC_ND_NI	Strict definition of kryptoracemate + achiral molecule	KRYPTORACEMIC	NO	P1	1	TRUE	FALSE	8.5	2	1	6	['C']	6	4	3	3	0	[[(1, 'SRS'), (1, 'RSR')]]	[2]	[2]	['racemic']	['C1']	4	2.0	2.0	RAC-1	contains following chiral atom(s)C	NA	14.136	12.39	10.057	100.4	98.3	115.8	1509.56467486	1.30590544781	C35 H31 N1 O3 P2,H2 O1	4,5-bis(Diphenylphosphine oxide)-2-phenyl-1-aza-7-oxabicyclo(2.2.1)heptane monohydrate	None	None	145-146deg.C	colorless	None	None	None	None	R.Grigg, M.J.Dorrity, F.Heaney, J.F.Malone, S.Rajviroongit, V.Sridharan, S.Surendrakumar
JODMUN	SCALEMIC	NC_ND_NI	Unbalanced Kryptoracemate	KRYPTORACEMIC	NO	P212121	19	TRUE	FALSE	6.37	3	1	9	['C']	9	9	5	4	0	[[(2, 'SRR'), (1, 'RSS')]]	[2]	[3]	['scalemic']	['C1']	3	3.0	12.0	scal-3-attention could contain stereoisomer	contains following chiral atom(s)C	NA	7.6174	26.721	34.0314	90.0	90.0	90.0	6926.90584233	1.29040326977	C30 H24 O2 S1	2-(2-(benzenecarbonyl)-3-(phenylsulfanyl)-2,3-dihydro-1H-inden-1-yl)-1-phenylethan-1-one	293 K	None	102-104 deg.C	None	None	None	None	None	Ze-Nan Feng, Jin-Yun Luo, Yang Zhang, Guang-Fen Du, Lin He
JOHJIA	RACEMIC	NC_ND_NI	Strict definition of kryptoracemate	KRYPTORACEMIC	NO	P212121	19	TRUE	FALSE	5.79	2	1	6	['C']	6	2	3	3	0	[[(1, 'RRR'), (1, 'SSS')]]	[2]	[2]	['racemic']	['C1']	2	2.0	8.0	RAC-1	contains following chiral atom(s)C	NA	7.466	12.476	20.269	90.0	90.0	90.0	1887.9725445	1.38051457378	C10 H12 O4	(+-)-4a-Methylhexahydro-2H,6H-oxeto(2',3':2,3)cyclopenta(1,2-b)pyran-2,6-dione	at 120 K	None	None	colorless	None	None	None	None	V.C.Purohit, A.S.Matla, D.Romo
JOJCET	RACEMIC	NC_ND_NI	Strict definition of kryptoracemate	KRYPTORACEMIC	NO	P212121	19	TRUE	FALSE	4.48	2	1	4	['C']	4	2	2	2	0	[[(1, 'SR'), (1, 'RS')]]	[2]	[2]	['racemic']	['C1']	2	2.0	8.0	RAC-1	contains following chiral atom(s)C	NA	11.7859	15.0476	20.963	90.0	90.0	90.0	3717.77775381	1.24134074445	C19 H25 N1 O5	t-butyl 3-(acetoxy)-7-oxo-3-phenylazepane-2-carboxylate	200 K	None	None	colorless	None	None	None	None	A.Dupas, P.-A.Lhotellier, G.Guillamot, C.Meyer, J.Cossy
JOLMUU	RACEMIC	NC_ND_NI	Strict definition of kryptoracemate	KRYPTORACEMIC	NO	P21	4	TRUE	FALSE	6.49	2	1	6	['C']	6	4	3	3	0	[[(1, 'SRR'), (1, 'RSS')]]	[2]	[2]	['racemic']	['C1']	2	2.0	4.0	RAC-1	contains following chiral atom(s)C	NA	8.9254	5.4183	37.012	90.0	93.659	90.0	1786.26995875	1.30295777156	C19 H24 F1 N1 O4	1,1'-(2-(4-fluorophenyl)-6-hydroxy-4-((2-hydroxyethyl)amino)-6-methylcyclohex-3-ene-1,3-diyl)diethanone	293 K	None	458.2 K	colorless	None	None	Dimethylsulfoxide	A H atom on an O atom appears to have been misplaced in the deposited CIF and this atom has been suppressed in the 3D structure.	V.R.Akhmetova, N.S.Akhmadiev, E.S.Meshcheryakova, L.M.Khalilov, A.G.Ibragimov
KABTIT	RACEMIC	NC_ND_NI	Strict definition of kryptoracemate	KRYPTORACEMIC	NO	P21	4	TRUE	FALSE	4.7	2	1	4	['C']	4	4	2	2	0	[[(1, 'SR'), (1, 'RS')]]	[2]	[2]	['racemic']	['C1']	2	2.0	4.0	RAC-1	contains following chiral atom(s)C	NA	9.1585	15.4867	15.0435	90.0	107.598	90.0	2033.83967959	1.3435764311	C25 H17 N1 O5	(trans,E)-2-Benzylidene-3-nitro-4-phenyl-3,4-dihydro-2H,5H-pyrano[3,2-c]chromen-5-one	293 K	None	None	yellow	None	None	None	None	S.Biswas, A.Dagar, S.M.Mobin, S.Samanta
KAQKOF	RACEMIC	NC_ND_NI	Strict definition of kryptoracemate	KRYPTORACEMIC	NO	P1	1	TRUE	FALSE	5.59	2	1	2	['C']	2	2	1	1	0	[[(1, 'S'), (1, 'R')]]	[2]	[2]	['racemic']	['C1']	2	2.0	2.0	RAC-1	contains following chiral atom(s)C	NA	4.6759	11.637	12.148	101.704	94.481	97.981	637.139397749	1.23690001476	C16 H15 N1 O1	4-methyl-2-phenyl-1,4-dihydroisoquinolin-3(2H)-one	296 K	None	None	colorless	None	None	None	None	Yue Hu, Zhiqiang Shen, Hanmin Huang
KAQNUO	RACEMIC	NC_ND_NI	Strict definition of kryptoracemate	KRYPTORACEMIC	NO	P212121	19	TRUE	FALSE	3.27	2	1	6	['C']	6	6	3	3	0	[[(1, 'RRR'), (1, 'SSS')]]	[2]	[2]	['racemic']	['C1']	2	2.0	8.0	RAC-1	contains following chiral atom(s)C	NA	5.45149	15.7094	38.6948	90.0	90.0	90.0	3313.80862602	1.38467863875	C18 H19 N1 O4 S1	2-(4-methoxyphenyl)-8-(methylsulfonyl)-3,3a,8,8a-tetrahydro-2H-furo[2,3-b]indole	180 K	None	96 deg.C	colorless	None	None	pentane/dichloromethane	None	V.Bizet, G.M.Borrajo-Calleja, C.Besnard, C.Mazet
KEHDOR	RACEMIC	NC_ND_NI	Strict definition of kryptoracemate	KRYPTORACEMIC	NO	P21	4	TRUE	FALSE	6.09	2	1	2	['C']	2	2	1	1	0	[[(1, 'S'), (1, 'R')]]	[2]	[2]	['racemic']	['C1']	2	2.0	4.0	RAC-1	contains following chiral atom(s)C	NA	7.0778	8.6949	18.4924	90.0	96.8806	90.0	1129.84022901	1.34184270656	C12 H12 N4 O1	5-((1H-Indol-3-yl)methyl)-4,5-dihydro-1,2,4-triazin-3(2H)-one	at 293 K	None	185deg.C	None	None	None	chloroform	The values of the bond lengths in the cif are given as between 0.1000 to 0.7400 and have been deleted	G.Verardo, P.Geatti, M.Merli, P.Strazzolini
KEKJAO	RACEMIC	NC_ND_NI	Strict definition of kryptoracemate	KRYPTORACEMIC	NO	P21	4	TRUE	FALSE	4.33	2	1	4	['C']	4	2	2	2	0	[[(1, 'SR'), (1, 'RS')]]	[2]	[2]	['racemic']	['C1']	2	2.0	4.0	RAC-1	contains following chiral atom(s)C	NA	5.3869	15.219	19.3773	90.0	97.571	90.0	1574.76469285	1.2963311293	C19 H17 N1 O3	1-benzyl-4'-methyl-5'H-spiro[indole-3,2'-oxolane]-2,5'(1H)-dione	100 K	None	None	colorless	None	None	None	None	C.S.Buxton, D.C.Blakemore, J.F.Bower
KETWAK	RACEMIC	NC_ND_NI	Strict definition of kryptoracemate	KRYPTORACEMIC	NO	P1	1	TRUE	FALSE	3.82	2	1	2	['C']	2	0	1	1	0	[[(1, 'S'), (1, 'R')]]	[2]	[2]	['racemic']	['C1']	2	2.0	2.0	RAC-1	contains following chiral atom(s)C	NA	8.8431	9.555	12.1445	111.821	96.36	102.19	910.676440349	1.62848050869	C15 H16 Br1 Cl3 O4	2,2,2-trichloroethyl 2-(4-bromophenyl)-2-hydroxy-3-[(propan-2-yl)oxy]but-3-enoate	100 K	None	None	colorless	None	None	None	None	Liangbing Fu, Kevin Hoang, C.Tortoreto, Wenbin Liu, H.M.L.Davies
KIGKOD	RACEMIC	NC_ND_NI	Strict definition of kryptoracemate	KRYPTORACEMIC	NO	P21	4	TRUE	FALSE	3.63	2	1	8	['C']	8	8	4	4	0	[[(1, 'SSSS'), (1, 'RRRR')]]	[2]	[2]	['racemic']	['C1']	2	2.0	4.0	RAC-1	contains following chiral atom(s)C	NA	11.06116	12.025	12.97101	90.0	92.7666	90.0	1723.26895399	1.2619913107	C20 H25 N1 O3	(1RS,2RS,3RS,4RS)-3-(dibenzylamino)cyclohexane-1,2,4-triol	150 K	None	None	colorless	None	None	None	None	Solange Da Silva Pinto, S.G.Davies, Ai M.Fletcher, P.M.Roberts, J.E.Thomson
KITLUV	RACEMIC	NC_ND_I	Contains also at least an other enantiomer in enantiopure proportion + achiral molecule	KRYPTORACEMIC	NO	P21	4	TRUE	FALSE	3.67	4	2	6	['C']	6	6	3	3	0	[[(1, 'S'), (1, 'R')], [(2, 'SR')]]	[2, 1]	[2, 2]	['racemic', 'chiral']	['C1']	5	2.0	4.0	Wa-could be Diast	contains following chiral atom(s)C	NA	9.484	21.915	10.988	90.0	100.87	90.0	2242.7900813	1.26311493538	C10 H16 N1 O1 1+,C16 H11 O3 1-,0.5(H2 O1)	(-)-Ephedrinium (+-)-(9-anthryl)hydroxyacetate hemihydrate	at 296 K	None	None	light yellow	None	None	ethanol/water	None	Bao-Lin Li, Zhen-Guo Zhang, Wei Wang, Jin Li, Chou-Wen Wang
KODQOK	RACEMIC	NC_ND_NI	Strict definition of kryptoracemate + achiral molecule	KRYPTORACEMIC	NO	P212121	19	TRUE	FALSE	9.26	2	1	4	['C']	4	2	2	2	0	[[(1, 'SR'), (1, 'RS')]]	[2]	[2]	['racemic']	['C1']	3	2.0	8.0	RAC-1	contains following chiral atom(s)C	NA	6.5456	22.454	29.173	90.0	90.0	90.0	4287.69882772	1.27929035146	C24 H22 N2 O2,0.5(C1 H2 Cl2)	syn-1-Benzyl-4,5-diphenyl-2-methyl-4,5-dihydroimidazole-4-carboxylic acid dichloromethane solvate	at 173 K	None	None	None	None	None	None	None	V.Sharma, J.J.Tepe
KOMKII	RACEMIC	NC_ND_NI	Strict definition of kryptoracemate	KRYPTORACEMIC	NO	P21	4	TRUE	FALSE	4.72	2	1	6	['C']	6	2	3	3	0	[[(1, 'SRR'), (1, 'RSS')]]	[2]	[2]	['racemic']	['C1']	2	2.0	4.0	RAC-1	contains following chiral atom(s)C	NA	11.565	13.526	15.417	90.0	106.26	90.0	2315.18968161	1.13482950159	C25 H34 N2 O2	8,11-di-t-butyl-7,10-diazatricyclo[4.3.3.01,6]dodeca-7,10-dien-9-yl benzoate	at 123 K	None	None	None	None	None	None	The hydrogen atoms on one of the molecules appear to have been wrongly assigned and have been suppressed.	Shaoguang Zhang, Ming Zhan, Wen-Xiong Zhang, Zhenfeng Xi
KOVBIG	RACEMIC	NC_ND_NI	Strict definition of kryptoracemate	KRYPTORACEMIC	NO	P1	1	TRUE	FALSE	4.7	4	1	4	['C']	4	4	2	2	0	[[(2, 'S'), (2, 'R')]]	[2]	[4]	['racemic']	['C1']	4	4.0	4.0	RAC-2	contains following chiral atom(s)C	NA	7.458	9.414	14.775	98.28	96.71	90.05	1019.33701403	1.1484991541	C12 H16 O1	11-(Hydroxymethyl)tetraspiro(2.0.0.2.0.2.0.1)undecane	at -150 deg.C	None	93-95deg.C	None	None	None	None	None	N.S.Zefirov, S.I.Kozhushkov, B.I.Ugrak, K.A.Lukin, O.V.Kokoreva, D.S.Yufit, Yu.T.Stuchkov, S.Zoellner, R.Boese, A.de Meijere
KUKFOM	RACEMIC	NC_ND_NI	Strict definition of kryptoracemate	KRYPTORACEMIC	NO	P21	4	TRUE	FALSE	3.36	2	1	8	['C']	8	6	4	4	0	[[(1, 'SSSR'), (1, 'RRRS')]]	[2]	[2]	['racemic']	['C1']	2	2.0	4.0	RAC-1	contains following chiral atom(s)C	NA	7.0336	20.633	10.916	90.0	102.955	90.0	1543.85358678	1.2364683474	C18 H25 N1 O2	(2'-Phenylhexahydrospiro[cyclopentane-1,7'-[1,2]oxazolo[2,3-a]pyridin]-2-yl)methanol	at 84 K	None	None	colorless	None	None	None	None	Sung-Hyun Yang, G.R.Clark, V.Caprio
KUMTET	RACEMIC	NC_ND_NI	Strict definition of kryptoracemate	KRYPTORACEMIC	NO	P21	4	TRUE	FALSE	3.2	2	1	4	['C']	4	4	2	2	0	[[(1, 'SS'), (1, 'RR')]]	[2]	[2]	['racemic']	['C1']	2	2.0	4.0	RAC-1	contains following chiral atom(s)C	NA	7.5673	20.2133	14.8978	90.0	92.625	90.0	2276.37789876	1.08126630597	C21 H42 N2 O3	Methyl 3-(di-isopropylamino)-2-((2,2,6,6-tetramethylpiperidin-1-yl)oxy)pentanoate	100 K	None	None	colorless	None	None	None	None	P.G.Jones, U.Jahn, E.Dinca
LACFEB	RACEMIC	NC_ND_NI	Strict definition of kryptoracemate	KRYPTORACEMIC	NO	P212121	19	TRUE	FALSE	7.3	2	1	2	['C']	2	0	1	1	0	[[(1, 'S'), (1, 'R')]]	[2]	[2]	['racemic']	['C1']	2	2.0	8.0	RAC-1	contains following chiral atom(s)C	NA	10.93	6.03	28.642	90.0	90.0	90.0	1887.7340718	1.9495739744	C4 H2 Cl2 N2 O6 S1	2,4-Dinitro-2,3-dichloro-3-thiolene-1,1-dioxide	at 294 K	None	84-85deg.C(dec)	light yellow	None	None	None	None	V.M.Berestovitskaya, I.A.Litvinov, I.E.Efremova, L.V.Lapshina, D.B.Krivolapov, A.T.Gubaidullin
LAZTIQ	RACEMIC	NC_ND_NI	Strict definition of kryptoracemate + achiral molecule	KRYPTORACEMIC	NO	P21	4	TRUE	FALSE	4.49	2	1	4	['C']	4	4	2	2	0	[[(1, 'SR'), (1, 'RS')]]	[2]	[2]	['racemic']	['C1']	3	2.0	4.0	RAC-1	contains following chiral atom(s)C	NA	10.348	19.082	14.985	90.0	90.054	90.0	2958.9448178	1.41086400879	C31 H26 Br1 N3 O4,0.5(C4 H8 O2)	cis-N-(4-Bromophenyl)-N-(4-methoxybenzyl)-2-(4-nitrophenyl)-5-phenyl-3,4-dihydro-2H-pyrrole-3-carboxamide ethyl acetate solvate	at 90 K	None	None	colorless	None	None	None	None	Choong Leol Yoo, M.M.Olmstead, D.J.Tantillo, M.J.Kurth
LELLEV	RACEMIC	NC_ND_NI	Strict definition of kryptoracemate	KRYPTORACEMIC	NO	P1	1	TRUE	FALSE	11.09	2	1	8	['C']	8	8	4	4	0	[[(1, 'RSSS'), (1, 'SRRR')]]	[2]	[2]	['racemic']	['C1']	2	2.0	2.0	RAC-1	contains following chiral atom(s)C	NA	7.9799	8.7756	17.288	87.612	85.963	78.796	1184.14679288	1.21880436886	C30 H30 N2 O1	(4-Anilino-1,2,6-triphenylpiperidin-3-yl)methanol	at 293 K	None	None	colorless	None	None	None	None	Xuejian Li, Yanyan Zhao, Haijun Qu, Zhenjun Mao, Xufeng Lin
LICJIT	RACEMIC	NC_ND_NI	Strict definition of kryptoracemate	KRYPTORACEMIC	NO	P21	4	TRUE	FALSE	3.38	2	1	10	['C']	10	6	5	5	0	[[(1, 'RRSRR'), (1, 'SSRSS')]]	[2]	[2]	['racemic']	['C1']	2	2.0	4.0	RAC-1	contains following chiral atom(s)C	NA	7.0443	24.124	11.1252	90.0	99.194	90.0	1866.29142629	1.31839283733	C22 H26 O5	9b-[3-(benzyloxy)propyl]octahydro-3H-5,9a-epoxyazuleno[4,5-c]furan-3,4(1H)-dione	173 K	None	None	colorless	None	None	None	None	Yuanyou Qiu, Jiaxin Zhong, Shan Du, Shuanhu Gao
LIKDAM	RACEMIC	NC_ND_NI	Strict definition of kryptoracemate	KRYPTORACEMIC	NO	P21	4	TRUE	FALSE	5.53	2	1	4	['C']	4	4	2	2	0	[[(1, 'SS'), (1, 'RR')]]	[2]	[2]	['racemic']	['C1']	2	2.0	4.0	RAC-1	contains following chiral atom(s)C	NA	11.3478	12.8754	12.5373	90.0	95.178	90.0	1824.31779233	1.07932708356	C21 H28 O1	4,4,7,11-Tetramethyl-10-phenylcycloundeca-2,6-dien-1-one	at 293 K	None	None	colorless	None	None	None	None	K.R.Ajish, N.Joseph, K.V.Radhakrishnan
LIKMEY	RACEMIC	NC_ND_NI	Strict definition of kryptoracemate	KRYPTORACEMIC	NO	P1	1	TRUE	FALSE	8.29	4	1	12	['C']	12	4	6	6	0	[[(2, 'SRS'), (2, 'RSR')]]	[2]	[4]	['racemic']	['C1']	4	4.0	4.0	RAC-2	contains following chiral atom(s)C	NA	10.747	14.12	16.719	107.93	107.91	90.12	2283.72024062	1.23872749663	C21 H28 Cl1 N1 O6	2'-n-Butyl-5'-chloro-4'-hydroxy-7'-methyl-6',8'-dioxo-4,4',5,6',7',8'-hexahydro-2'H,3H-spiro(furan-2,3'-isoquinolin)-7'-yl butanoate	at 296 K	None	None	yellow	None	None	diethyl ether	None	Sang Yeul Lee, R.C.Clark, D.L.Boger
LIMHIZ	RACEMIC	NC_ND_NI	Strict definition of kryptoracemate	KRYPTORACEMIC	NO	P212121	19	TRUE	FALSE	6.8	2	1	2	['C']	2	2	1	1	0	[[(1, 'S'), (1, 'R')]]	[2]	[2]	['racemic']	['C1']	2	2.0	8.0	RAC-1	contains following chiral atom(s)C	NA	6.1411	22.447	30.654	90.0	90.0	90.0	4225.63157469	1.28554413924	C27 H21 Cl1 N2	8-(4-Chlorophenyl)-14,14-dimethyl-14,14a-dihydrobenzo(f)indolo(1,2-c)quinazoline	at 296.1 K	None	198.5-199.5deg.C	yellow	None	None	ethanol	None	A.Watanabe, K.Yamaguchi, F.Ito, Y.Yoshitake, K.Harano
LINJAW	RACEMIC	NC_ND_NI	Strict definition of kryptoracemate	KRYPTORACEMIC	NO	P21	4	TRUE	FALSE	7.07	2	1	2	['C']	2	2	1	1	0	[[(1, 'S'), (1, 'R')]]	[2]	[2]	['racemic']	['C1']	2	2.0	4.0	RAC-1	contains following chiral atom(s)C	NA	6.6889	20.404	6.7943	90.0	102.245	90.0	906.192048002	1.27008688783	C7 H15 N3 S1	5,5,7-trimethyl-1,2,4-triazepane-3-thione	100 K	None	None	colorless	None	None	None	None	A.A.Fesenko, M.S.Grigoriev, A.D.Shutalev
LIPHID	RACEMIC	NC_ND_NI	Strict definition of kryptoracemate	KRYPTORACEMIC	NO	P21	4	TRUE	FALSE	10.63	8	1	16	['C']	16	16	8	8	0	[[(4, 'SR'), (4, 'RS')]]	[2]	[8]	['racemic']	['C1']	8	8.0	16.0	RAC-2	contains following chiral atom(s)C	NA	17.426	23.338	18.322	90.0	101.814	90.0	7293.49855667	1.29056817504	C17 H24 Br1 N1 O2	t-Butyl 4-bromo-N,N-dimethyl-Î²-vinylphenylalaninate	at 153 K	None	None	colorless	None	None	None	None	A.Soheili, U.K.Tambar
LITCEW	RACEMIC	NC_ND_NI	Strict definition of kryptoracemate	KRYPTORACEMIC	NO	P21	4	TRUE	FALSE	7.39	2	1	4	['C']	4	2	2	2	0	[[(1, 'SR'), (1, 'RS')]]	[2]	[2]	['racemic']	['C1']	2	2.0	4.0	RAC-1	contains following chiral atom(s)C	NA	10.282	12.652	18.57	90.0	91.36	90.0	2415.05113021	1.25018550511	C32 H26 N2 O1	3-(4-Methoxyphenyl)-1,4-diphenyl-4,9-dihydro-10H-4,9-methano-benzo[4,5]cyclohepta[1,2-c]pyrazole	None	None	180deg.C	colorless	None	None	None	None	F.Djapa, M.Msaddek, K.Ciamala, J.Vebrel, C.Riche
LIWMOW	RACEMIC	NC_ND_NI	Strict definition of kryptoracemate	KRYPTORACEMIC	NO	P1	1	TRUE	FALSE	6.78	8	1	8	['C']	8	8	4	4	0	[[(4, 'S'), (4, 'R')]]	[2]	[8]	['racemic']	['C1']	8	8.0	8.0	RAC-2	contains following chiral atom(s)C	NA	8.0226	15.0583	38.7317	90.0	90.0	90.0	4679.04954329	1.30205242375	C28 H30 N2 O2 S1	N-(2,6-dimethylphenyl)-4-[(4-methoxyphenyl)methyl]-5-[(4-methoxyphenyl)methylidene]-3-methyl-1,3-thiazolidin-2-imine	293 K	None	None	yellow	None	None	None	None	R.P.Singh, D.Gout, C.J.Lovely
LIXBEA	RACEMIC	NC_ND_NI	Strict definition of kryptoracemate	KRYPTORACEMIC	NO	P21	4	TRUE	FALSE	6.18	2	1	8	['C']	8	8	4	4	0	[[(1, 'SSRR'), (1, 'RRSS')]]	[2]	[2]	['racemic']	['C1']	2	2.0	4.0	RAC-1	contains following chiral atom(s)C	NA	22.625	9.6582	24.852	90.0	99.565	90.0	5355.08149835	1.16520601209	C68 H66 Si2	(Undecacyclo-[40.3.1.05,4508,13012,21014,29015,20022,31023,28030,35038,43]-hexatetraconta-1(46),2,4,8,10,12,15,17,19,23,25,27,30,32,34,38,40,42,44-nonadecaene-6,36-diyne-16,27-diyldiethyne-2,1-diyl)-bis(tri-isopropylsilane)	at 123 K	None	280-282deg.C	yellow	None	None	None	None	S.Toyota, M.Kuga, A.Takatsu, M.Goichi, T.Iwanaga
LOBREZ	RACEMIC	NC_ND_NI	Strict definition of kryptoracemate	KRYPTORACEMIC	NO	P212121	19	TRUE	FALSE	6.83	2	1	6	['C']	6	6	3	3	0	[[(1, 'RRS'), (1, 'SSR')]]	[2]	[2]	['racemic']	['C1']	2	2.0	8.0	RAC-1	contains following chiral atom(s)C	NA	9.6561	20.5988	20.9879	90.0	90.0	90.0	4174.578787	1.19188415849	C27 H22 Si1	(RRS/SSR)-tris(Inden-1-yl)silane	None	None	91-92deg.C	yellow	None	None	dichloromethane/hexanes	None	M.Stradiotto, M.A.Brook, M.J.McGlinchey
LOPYEW	RACEMIC	NC_ND_NI	Strict definition of kryptoracemate	KRYPTORACEMIC	NO	P21	4	TRUE	FALSE	7.05	2	1	4	['C']	4	2	2	2	0	[[(1, 'SS'), (1, 'RR')]]	[2]	[2]	['racemic']	['C1']	2	2.0	4.0	RAC-1	contains following chiral atom(s)C	NA	9.847	15.0084	13.6649	90.0	103.333	90.0	1965.07105249	1.19456678684	C21 H23 N1 O4	1-Methyl-8,10-dioxatricyclo[7.2.1.02,7]dodeca-2,4,6-trien-4-yl (4-isopropylphenyl)carbamate	at 293 K	None	None	None	None	None	None	None	Weiming Luo, Qian-sheng Yu, Ming Zhan, D.Parrish, J.R.Deschamps, S.S.Kulkarni, H.W.Holloway, G.M.Alley, D.K.Lahiri, ArnoldBrossi, N.H.Greig
LOZZEF	RACEMIC	NC_ND_NI	Strict definition of kryptoracemate	KRYPTORACEMIC	NO	P21	4	TRUE	FALSE	4.22	2	1	2	['C']	2	2	1	1	0	[[(1, 'S'), (1, 'R')]]	[2]	[2]	['racemic']	['C1']	2	2.0	4.0	RAC-1	contains following chiral atom(s)C	NA	6.4979	10.2025	14.5685	90.0	99.987	90.0	951.18126502	1.2655467671	C10 H15 N1 O2	Spiro[cyclopentane-1,8'-1'-aza-7'-oxabicyclo(3.2.1)octan-4'-one]	at 293 K	None	59-60 deg.C	colorless	None	None	diethyl ether	None	P.J.Dunn, A.B.Graham, R.Grigg, I.S.Saba, M.Thornton-Pett
LUMJUZ	RACEMIC	NC_ND_NI	Strict definition of kryptoracemate	KRYPTORACEMIC	NO	P21	4	TRUE	FALSE	5.54	8	1	8	['C']	8	0	4	4	0	[[(4, 'S'), (4, 'R')]]	[2]	[8]	['racemic']	['C1']	8	8.0	16.0	RAC-2	contains following chiral atom(s)C	NA	14.4399	28.106	13.4152	90.0	90.103	90.0	5444.52100346	1.30449833047	C17 H17 N1 O2	3-Hydroxy-2-methyl-3-(2-phenylethyl)isoindolin-1-one	at 100 K	None	338-343 K	colorless	None	None	acetone	None	F.Hatoum, S.Gallagher, L.Baragwanath, J.Lex, M.Oelgemoller
LUQLUF	RACEMIC	NC_ND_NI	Strict definition of kryptoracemate	KRYPTORACEMIC	NO	P1	1	TRUE	FALSE	3.66	2	1	12	['C']	12	12	6	6	0	[[(1, 'SRSRSS'), (1, 'RSRSRR')]]	[2]	[2]	['racemic']	['C1']	2	2.0	2.0	RAC-1	contains following chiral atom(s)C	NA	9.382	10.224	13.076	93.713	93.174	90.627	1249.58476111	1.48151148989	C27 H29 Br1 N2 O6	1-((3-Bromo-6-methoxypyridin-2-yl)methyl)-5-oxododecahydro-1H-cyclopenta[a]naphthalen-3-yl 4-nitrobenzoate	at 156 K	None	None	colorless	None	None	None	Study temperature given as 156 K and 293 K in the CIF	K.K.Larson, R.Sarpong
LUWHOC	RACEMIC	NC_ND_NI	Strict definition of kryptoracemate + achiral molecule	KRYPTORACEMIC	NO	P21	4	TRUE	FALSE	6.08	2	1	2	['P']	0	0	1	1	0	[[(1, 'S'), (1, 'R')]]	[2]	[2]	['racemic']	['C1']	4	2.0	4.0	RAC-1	contains following chiral atom(s)P	NA	12.475	8.34	27.633	90.0	100.146	90.0	2830.02005064	1.29788031151	C32 H22 O4 P2,0.5(C2 H3 N1)	2-(Diphenylphosphino)dinaphtho[2,1-d:1',2'-f][1,3,2]dioxaphosphepin-4-ol 4-oxide acetonitrile solvate	150 K	None	None	colorless	None	None	None	None	T.Iwai, Y.Akiyama, K.Tsunoda, M.Sawamura
LUYMAV	RACEMIC	NC_ND_NI	Strict definition of kryptoracemate	KRYPTORACEMIC	NO	P1	1	TRUE	FALSE	4.83	2	1	2	['C']	2	0	1	1	0	[[(1, 'S'), (1, 'R')]]	[2]	[2]	['racemic']	['C1']	2	2.0	2.0	RAC-1	contains following chiral atom(s)C	NA	7.6342	9.4462	12.1984	80.301	73.647	71.635	798.021107841	1.74446090703	C15 H10 I1 N5 O2	6'-amino-5-iodo-3'-methyl-2-oxo-1,2-dihydro-1'H-spiro[indole-3,4'-pyrano[2,3-c]pyrazole]-5'-carbonitrile	296 K	None	None	yellow	None	None	None	None	Chandan Bodhak, A.Kundu, A.Pramanik
MANBOU	RACEMIC	NC_ND_NI	Strict definition of kryptoracemate	KRYPTORACEMIC	NO	P212121	19	TRUE	FALSE	3.9	2	1	8	['C']	8	4	4	4	0	[[(1, 'RSRR'), (1, 'SRSS')]]	[2]	[2]	['racemic']	['C1']	2	2.0	8.0	RAC-1	contains following chiral atom(s)C	NA	13.3486	14.6574	20.1067	90.0	90.0	90.0	3933.99186342	1.27117094021	C21 H28 O6	rac-(2R,5aR,9aS)-9a-((R)-(3,5-dimethoxyphenyl)(methoxymethoxy)methyl)-2,6,7,8,9,9a-hexahydro-1H-2,5a-epoxybenzo[d]oxepine	at 185 K	None	None	colorless	None	None	None	None	R.R.Castillo, M.Aquino, Z.Gandara, I.Safir, Z.Elkhayat, P.Retailleau, S.Arseniyadis
MAPXUX	RACEMIC	NC_ND_I	Strict definition of kryptoracemate + achiral molecule	KRYPTORACEMIC	NO	P21	4	TRUE	FALSE	3.44	2	1	2	['C']	2	0	1	1	0	[[(1, 'S'), (1, 'R')]]	[2]	[2]	['racemic']	['C1']	4	2.0	4.0	RAC-1	contains following chiral atom(s)C	NA	10.66	8.712	17.624	90.0	90.77	90.0	1636.59166845	1.23709486377	C17 H21 N2 O1 1+,Cl1 1-	2-Amino-N-(1-methyl-1,2-diphenylethyl)acetamide hydrochloride	at 150 K	None	None	colorless	None	None	None	None	G.R.Lewis, G.Steele, L.McBride, A.J.Florence, A.R.Kennedy, N.Shankland, W.I.F.David, K.Shankland, S.J.Teat
MATCOC01	RACEMIC	NC_ND_NI	Strict definition of kryptoracemate	KRYPTORACEMIC	NO	P212121	19	TRUE	FALSE	3.2	2	1	4	['P']	0	0	2	2	0	[[(1, 'SR'), (1, 'RS')]]	[2]	[2]	['racemic']	['C1']	2	2.0	8.0	RAC-1	contains following chiral atom(s)P	NA	12.9321	19.0714	21.9285	90.0	90.0	90.0	5408.29726517	1.34729246826	C28 H30 N4 O4 P2	diphenyl P,P'-piperazine-1,4-diylbis(N-phenyl(phosphonamidate))	100 K	None	None	colorless	orthorhombic P212121 polymorph	None	None	None	K.Gholivand, M.Hosseini, A.A.E.Valmoozi, K.Farshadfar
MECZUP	SCALEMIC	NC_ND_NI	Unbalanced Kryptoracemate	KRYPTORACEMIC	NO	P21	4	TRUE	FALSE	6.4	3	1	42	['C']	42	42	18	24	0	[[(1, 'RRRRRSSSRRRRRS'), (2, 'SSSSSRRRSSSSSR')]]	[2]	[3]	['scalemic']	['C1']	3	3.0	6.0	scal-3-attention could contain stereoisomer	contains following chiral atom(s)C	NA	7.765	17.781	24.799	90.0	90.376	90.0	3423.91093484	1.27627379571	C28 H38 O4	exo-trans-exo-(13R,24R)-14,23-Dioxaoctacyclo(25.3.0.02,5.03,29.04,8.06,10.09,13.024,28)triacontane-15,22-dione	None	None	529-530K	colorless	None	None	None	None	R.Chebolu, W.Zhang, E.Galoppini, R.Gilardi
MEHFEL	RACEMIC	NC_ND_I	Contains also at least an other enantiomer in enantiopure proportion + achiral molecule	KRYPTORACEMIC	NO	P21212	18	TRUE	FALSE	5.9	3	2	5	['C']	5	5	3	2	0	[[(1, 'R')], [(1, 'SS'), (1, 'RR')]]	[1, 2]	[1, 2]	['chiral', 'racemic']	['C2']	4	0.5	2.0	RAC-1	contains following chiral atom(s)C	NA	12.609	13.235	9.689	90.0	90.0	90.0	1616.90143423	1.41713385535	2(C8 H12 N1 1+),C4 H2 Br2 O4 2-,C4 H4 Br2 O4,2(H2 O1)	bis((R)-1-Phenylethanaminium) (S,S)-2,3-dibromosuccinate (R,R)-2,3-dibromosuccinic acid dihydrate	at 299 K	None	None	colorless	None	None	None	None	A.Fischer
MEKJIX	RACEMIC	NC_ND_NI	Strict definition of kryptoracemate	KRYPTORACEMIC	NO	P21	4	TRUE	FALSE	3.44	2	1	4	['C']	4	4	2	2	0	[[(1, 'SS'), (1, 'RR')]]	[2]	[2]	['racemic']	['C1']	2	2.0	4.0	RAC-1	contains following chiral atom(s)C	NA	5.451	15.0943	18.1232	90.0	93.661	90.0	1488.11631416	1.3493996114	C17 H18 O5	Methyl (R*,R*)-3-hydroxy-2-(2-methoxyphenoxy)-3-phenylpropanoate	at 90 K	None	None	colorless	None	None	dichloromethane/hexanes	None	A.Wu, B.O.Patrick, E.Chung, B.R.James
MEQMAZ	RACEMIC	NC_ND_NI	Strict definition of kryptoracemate	KRYPTORACEMIC	NO	P21	4	TRUE	FALSE	2.8	4	1	8	['C' 'P']	4	4	4	4	0	[[(2, 'SR'), (2, 'RS')]]	[2]	[4]	['racemic']	['C1']	4	4.0	8.0	RAC-2	contains following chiral atom(s)C,P	NA	9.2618	20.7045	15.2718	90.0	106.969	90.0	2801.03450636	1.36232357192	C15 H14 N1 O3 P1	N-[1-(6-oxo-6H-6-dibenzo[c,e][1,2]oxaphosphinin-6-yl)ethyl]formamide	180.2 K	None	None	colorless	None	None	None	None	K.Garth, C.Klinkowski, Olaf Fuhr, Manfred Doring
MEXXOF	RACEMIC	NC_ND_NI	Strict definition of kryptoracemate	KRYPTORACEMIC	NO	P212121	19	TRUE	FALSE	3.04	2	1	2	['C']	2	2	1	1	0	[[(1, 'S'), (1, 'R')]]	[2]	[2]	['racemic']	['C1']	2	2.0	8.0	RAC-1	contains following chiral atom(s)C	NA	10.8597	11.1368	19.408	90.0	90.0	90.0	2347.24829348	1.39812672945	C11 H14 B1 F4 N1	trifluoro[(4-fluorophenyl)(pyrrolidin-1-ium-1-yl)methyl]borate	100 K	None	None	colorless	None	None	None	None	T.Shiro, A.Schuhmacher, M.K.Jackl, J.W.Bode
MEZFAB	RACEMIC	NC_ND_NI	Strict definition of kryptoracemate	KRYPTORACEMIC	NO	P1	1	TRUE	FALSE	7.61	4	1	4	['P']	0	0	2	2	0	[[(2, 'S'), (2, 'R')]]	[2]	[4]	['racemic']	['C1']	4	4.0	4.0	RAC-2	contains following chiral atom(s)P	NA	8.8518	10.205	34.382	89.242	89.353	64.554	2804.22333113	1.17097549551	C34 H28 B1 O1 P1	trihydrido[1-(2'-methoxy[1,1'-binaphthalen]-2-yl)-1,2,5,6-tetrahydroindeno[6,7,1-cde]phosphindole]boron	100 K	None	None	colorless	None	None	None	None	Ge Wang, S.K.Gibbons, D.S.Glueck, C.Sibbald, J.T.Fleming, L.J.Higham, A.L.Rheingold
MIBGIO	RACEMIC	NC_ND_NI	Strict definition of kryptoracemate	KRYPTORACEMIC	NO	P1	1	TRUE	FALSE	4.46	2	1	6	['C']	6	6	3	3	0	[[(1, 'RRR'), (1, 'SSS')]]	[2]	[2]	['racemic']	['C1']	2	2.0	2.0	RAC-1	contains following chiral atom(s)C	NA	10.2659	10.3513	13.038	97.61	110.104	90.809	1286.96188586	1.39971818839	C27 H25 Cl2 N3 O5	(2S*,4S*,5S*)-methyl 1-((methoxycarbonyl)methyl)-3-(phenylcabamoyl)-2,5-bis(4-chlorophenyl)imidazolidine-4-carboxylate	at 173 K	None	170-171 deg.C	colorless	None	None	None	None	E.Erkizia, E.Aldaba, Y.Vara, A.Arrieta, H.Gornitzka, F.P.Cossio
MIKTUY	RACEMIC	NC_ND_NI	Strict definition of kryptoracemate	KRYPTORACEMIC	NO	P212121	19	TRUE	FALSE	3.12	2	1	2	['C']	2	0	1	1	0	[[(1, 'S'), (1, 'R')]]	[2]	[2]	['racemic']	['C1']	2	2.0	8.0	RAC-1	contains following chiral atom(s)C	NA	11.6524	15.998	18.6279	90.0	90.0	90.0	3472.52175188	1.6267276659	C16 H19 F3 I1 N1 O1	1-ethyl-5-iodo-3-methyl-3-(3,3,3-trifluoro-2,2-dimethylpropyl)-1,3-dihydro-2H-indol-2-one	296 K	None	138-140 deg.C	colorless	None	None	None	None	Yingkun Shi, Hongqing Xiao, Xiu-Hua Xu, Yangen Huang
MIVZAT	RACEMIC	NC_ND_NI	Strict definition of kryptoracemate	KRYPTORACEMIC	NO	P212121	19	TRUE	FALSE	3.33	2	1	8	['C']	8	8	4	4	0	[[(1, 'SRSR'), (1, 'RSRS')]]	[2]	[2]	['racemic']	['C1']	2	2.0	8.0	RAC-1	contains following chiral atom(s)C	NA	7.8788	18.0848	24.9651	90.0	90.0	90.0	3557.19027637	1.32350059651	C20 H22 N2 O4	2,2'-Dimethyl-6-vinyl-3a,3a',4,4',7,7',7a,7a'-octahydro-1H,1'H-5,5'-bi-isoindole-1,1',3,3'(2H,2'H)-tetrone	at 200 K	None	163-165 deg.C	colorless	None	None	dichloroethane/petroleum spirits	None	G.Bojase, A.D.Payne, A.C.Willis, M.S.Sherburn
MOHVEK	RACEMIC	NC_ND_NI	Strict definition of kryptoracemate	KRYPTORACEMIC	NO	P21	4	TRUE	FALSE	6.18	4	1	16	['C']	16	12	8	8	0	[[(2, 'SRSR'), (2, 'RSRS')]]	[2]	[4]	['racemic']	['C1']	4	4.0	8.0	RAC-2	contains following chiral atom(s)C	NA	8.134	11.004	38.07	90.0	90.061	90.0	3407.51189434	1.29566694018	C18 H20 O6	Dimethyl 3-methyl-4,5-dioxo-4,4a,5,6,6a,7,8,8a-octahydropentaleno-(1,6-cd)pentalene-1,1(2H)-dicarboxylate	at 293 K	None	None	None	None	None	diethyl ether/dichloromethane/hexane	None	Seung Uk Son, Kang Hyun Park, Young Keun Chung
MOJSEJ	RACEMIC	NC_ND_NI	Strict definition of kryptoracemate	KRYPTORACEMIC	NO	P21	4	TRUE	FALSE	8.2	2	1	4	['C']	4	4	2	2	0	[[(1, 'SR'), (1, 'RS')]]	[2]	[2]	['racemic']	['C1']	2	2.0	4.0	RAC-1	contains following chiral atom(s)C	NA	5.4963	8.719	28.954	90.0	90.749	90.0	1387.42197109	1.25102388834	C15 H19 N1 O3	N-Benzyl-5-(1-(methoxycarbonyl)ethyl)pyrrolidin-2-one	at -58deg.C	None	None	None	None	None	None	None	Y.Guindon, M.Bencheqroun
MONVUG	SCALEMIC	NC_ND_NI	Unbalanced Kryptoracemate	KRYPTORACEMIC	NO	P21	4	TRUE	FALSE	4.01	3	1	15	['C']	15	6	8	7	0	[[(1, 'SSSRR'), (2, 'RRRSS')]]	[2]	[3]	['scalemic']	['C1']	3	3.0	6.0	scal-3-attention could contain stereoisomer	contains following chiral atom(s)C	NA	11.5999	9.9553	14.6251	90.0	99.737	90.0	1664.58391693	1.27061229713	C12 H20 O3	1-(Hydroxymethyl)-4,10-dimethyl-3-oxatricyclo[5.2.1.02,4]decan-10-ol	at 203 K	None	None	colorless	None	None	None	None	Lei Chen, Xuqing Zhang, A.Schultz
MONXUK	RACEMIC	NC_ND_NI	Strict definition of kryptoracemate	KRYPTORACEMIC	NO	P212121	19	TRUE	FALSE	8.74	4	1	8	['C']	8	8	4	4	0	[[(2, 'SR'), (2, 'RS')]]	[2]	[4]	['racemic']	['C1']	4	4.0	16.0	RAC-2	contains following chiral atom(s)C	NA	12.2743	21.787	33.511	90.0	90.0	90.0	8961.51745427	1.27356873992	C24 H31 N1 O4 S1	9,9-dimethyl-2-((4-methylphenyl)sulfonyl)-1,2,3,3a,5,6,7,8,8a,9-decahydrobenzo[4,5]cyclohepta[1,2-c]pyrrol-10-yl acetate	at 103 K	None	None	colorless	None	None	None	None	Weidong Rao, Sally, S.N.Berry, Philip Wai Hong Chan
MORSAO	RACEMIC	NC_ND_NI	Strict definition of kryptoracemate + achiral molecule	KRYPTORACEMIC	NO	P21	4	TRUE	FALSE	5.06	2	1	6	['C']	6	6	3	3	0	[[(1, 'RRS'), (1, 'SSR')]]	[2]	[2]	['racemic']	['C1']	4	2.0	4.0	RAC-1	contains following chiral atom(s)C	NA	10.7514	24.6138	13.2538	90.0	108.545	90.0	3325.26611199	1.3376678855	C46 H32,C1 H2 Cl2	5-(Tetracyclo[6.6.2.02,7.09,14]hexadeca-2,4,6,9,11,13-hexaen-15-yl)octacyclo[16.6.6.02,17.03,16.04,13.06,11.019,24.025,30]triaconta-3,5,7,9,11,13,15,19,21,23,25,27,29-tridecaene dichloromethane solvate	at 108 K	None	None	pale yellow	None	None	dichloromethane/methanol	None	M.Pillekamp, A.Aniol, J.Heppekausen, S.Neukirchen, S.Seel, I.M.Oppel, G.Dyker
MOZZEG	RACEMIC	NC_D_I	Strict definition of kryptoracemate + achiral molecule	KRYPTORACEMIC	NO	P1	1	TRUE	TRUE	4.65	4	1	8	['N']	0	8	4	4	0	[[(2, 'SS'), (2, 'RR')]]	[2]	[4]	['racemic']	['C1']	13	6.0	6.0	RAC-2	contains following chiral atom(s)N	NA	15.616	15.722	23.92	75.19	88.72	83.83	5644.64540956	1.1273310127	C16 H36 Li1 N6 1+,C24 H20 B1 1-	(13,18-Dimethyl-1,4,7,10,13,18-hexaazabicyclo(8.5.5)icosane)-lithium tetraphenylborate	at 173 K	None	None	colorless	None	None	chloroform/cyclohexane	Two of the lithium atoms were not located during the refinement	M.Vlassa, Ruy Huang, J.E.Jackson, J.L.Dye
MUBLUQ	RACEMIC	NC_ND_NI	Strict definition of kryptoracemate	KRYPTORACEMIC	NO	P212121	19	TRUE	FALSE	9.34	2	1	4	['C']	4	4	2	2	0	[[(1, 'SR'), (1, 'RS')]]	[2]	[2]	['racemic']	['C1']	2	2.0	8.0	RAC-1	contains following chiral atom(s)C	NA	18.673	22.493	9.99	90.0	90.0	90.0	4195.91777211	1.03673342561	C18 H33 N1 O4	rac-2-(3'-(t-butoxy)-2'-(t-butoxycarbonylamino)propylidene)-1-(hydroxymethyl)cyclopentane	at 296.2 K	None	None	colorless	None	None	None	None	A.Otaka, F.Katagiri, T.Kinoshita, Y.Odagaki, S.Oishi, H.Tamamura, N.Hamanaka, N.Fujii
MUBYIR	RACEMIC	NC_ND_NI	Strict definition of kryptoracemate	KRYPTORACEMIC	NO	P21	4	TRUE	FALSE	4.24	2	1	2	['C']	2	2	1	1	0	[[(1, 'S'), (1, 'R')]]	[2]	[2]	['racemic']	['C1']	2	2.0	4.0	RAC-1	contains following chiral atom(s)C	NA	6.5464	7.5651	27.6851	90.0	96.8666	90.0	1361.24713033	1.44127965586	C13 H13 N1 O3 S2	2-((Dimethylamino)carbonyl)-6-(2-thienyl)-2H-thiopyran-3-carboxylic acid	at 293 K	None	475 K	orange	None	None	acetone/hexane	None	M.Chruszcz, K.Stadnicka, A.Budzowski, K.Bogdanowicz-Szwed
MUDQIN	RACEMIC	NC_ND_NI	Strict definition of kryptoracemate	KRYPTORACEMIC	NO	P21	4	TRUE	FALSE	4.51	2	1	6	['C']	6	4	3	3	0	[[(1, 'SRR'), (1, 'RSS')]]	[2]	[2]	['racemic']	['C1']	2	2.0	4.0	RAC-1	contains following chiral atom(s)C	NA	9.6212	21.1372	8.4073	90.0	102.992	90.0	1665.98532681	1.6437189676	C16 H15 Br1 N2 O4 S1	4-bromo-16-(ethoxycarbonyl)-9-methyl-14-oxo-8-oxa-12-thia-15-aza-10-azoniatetracyclo[7.6.1.02,7.011,15]hexadeca-2,4,6,10-tetraene	293 K	None	None	None	None	None	None	The assignment of hydrogen atoms to the nitrogens in the rings appears to be incorrect. We have suppressed these hydrogens.	I.V.Kulakov, S.A.Talipov, Z.T.Shulgau, T.M.Seilkhanov
MUKCUS	RACEMIC	NC_ND_NI	Strict definition of kryptoracemate	KRYPTORACEMIC	NO	P212121	19	TRUE	FALSE	7.0	2	1	2	['C']	2	2	1	1	0	[[(1, 'S'), (1, 'R')]]	[2]	[2]	['racemic']	['C1']	2	2.0	8.0	RAC-1	contains following chiral atom(s)C	NA	13.9141	17.0104	23.997	90.0	90.0	90.0	5679.71570614	1.34135349355	C30 H38 Br1 O4 P1	3-(3-(4-bromophenyl)-3-(tributylphosphonio)propanoyl)-2-oxo-2H-chromen-4-olate	293 K	None	None	colorless	None	None	None	None	Chia-Jui Lee, Cheng-Che Tsai, Shao-Hao Hong, Geng-Hua Chang, Mei-Chun Yang, L.Mohlmann, Wenwei Lin
MUSKAM	SCALEMIC	NC_ND_NI	Unbalanced Kryptoracemate	KRYPTORACEMIC	NO	I41	80	TRUE	FALSE	6.04	3	1	6	['C']	6	0	2	4	0	[[(2, 'SS'), (1, 'RR')]]	[2]	[3]	['scalemic']	['C2']	3	1.5	12.0	scal-3-attention could contain stereoisomer	contains following chiral atom(s)C	NA	13.2519	13.2519	18.435	90.0	90.0	90.0	3237.4229563	2.21780367278	C9 H12 N4 O4	3,7-Diazabicyclo(3.3.1)nonane-2,6-dione-1,5-dicarboxamide	at 110 K	None	347-352 deg.C(dec.)	colorless	None	None	water	None	R.G.Kostyanovsky, K.A.Lyssenko, D.A.Lenev, I.A.Bronzova
MUTHOA	RACEMIC	NC_D_I	Contains also at least an other enantiomer in enantiopure proportion + achiral molecule	KRYPTORACEMIC	NO	C2	5	TRUE	TRUE	6.2	3	2	9	['C' 'P']	6	6	4	5	0	[[(1, 'S'), (1, 'R')], [(1, 'SRRSSSR')]]	[2, 1]	[2, 1]	['racemic', 'chiral']	['C1']	7	0.5	2.0	W1_enantiopure AU	contains following chiral atom(s)C,P	NA	22.736	21.619	14.974	90.0	121.769	90.0	6257.44713949	0.713973198816	C55 H49 O10 P3 S1,0.5(Na1 1+),2(C4 H10 O1),H2 O1,0.5(Br1 1-)	hemisodium hemibromide 1,21,23,25-tetraethyl-5,9,13-triphenyl-13-sulfanylidene-1H,5H,9H,13H,17H,21H,23H,25H-2,20:3,19-bis(metheno)-5,9,13-[1,3]dioxocino[5'',4'':8',9'][1,3,2]benzodioxaphosphocino[5',4':8,9][1,3,2]benzodioxaphosphocino[5,4-i][1,3,2]benzodioxaphosphocine-5,9-dione butan-2-ol solvate monohydrate	100 K	None	None	colorless	None	None	None	None	G.BRANCATELLI, T.Barbosa, E.Dalcanale, S.Geremia
NACNAI	RACEMIC	NC_ND_NI	Strict definition of kryptoracemate	KRYPTORACEMIC	NO	P1	1	TRUE	FALSE	5.11	2	1	2	['C']	2	0	1	1	0	[[(1, 'S'), (1, 'R')]]	[2]	[2]	['racemic']	['C1']	2	2.0	2.0	RAC-1	contains following chiral atom(s)C	NA	9.4552	9.863	10.0008	70.277	80.825	76.566	850.553952112	1.4653823519	C16 H16 F3 N1 O6	Ethyl 4-(3,4-dimethoxyphenyl)-2-hydroxy-5-imino-2-(trifluoromethyl)-2,5-dihydrofuran-3-carboxylate	at 293 K	None	None	colorless	None	None	None	None	Liping Song, Xianfu Li, Chunhui Xing, Dongmei Li, Shizheng Zhu, Hongmei Deng, Min Shao
NAJCUX	RACEMIC	NC_ND_NI	Strict definition of kryptoracemate	KRYPTORACEMIC	NO	P1	1	TRUE	FALSE	5.77	2	1	6	['C']	6	2	3	3	0	[[(1, 'RRR'), (1, 'SSS')]]	[2]	[2]	['racemic']	['C1']	2	2.0	2.0	RAC-1	contains following chiral atom(s)C	NA	7.606	9.793	10.946	103.24	107.106	96.723	743.48320993	1.18086959062	C16 H24 O3	rac-2-(Hydroxymethyl)-3-(4-methoxy-3-methylphenyl)-2,3-dimethylcyclopentanediol	at 293 K	None	133-134deg.C	colorless	None	None	ethyl acetate/petroleum ether	None	S.P.Chavan, M.Thakkar, R.K.Kharul, A.B.Pathak, G.V.Bhosekar, M.M.Bhadbhade
NATDUK	RACEMIC	NC_ND_NI	Strict definition of kryptoracemate	KRYPTORACEMIC	NO	P1	1	TRUE	FALSE	5.19	4	1	4	['C']	4	4	1	3	0	[[(3, 'S'), (1, 'R')]]	[2]	[4]	['racemic']	['C1']	4	4.0	4.0	RAC-2	contains following chiral atom(s)C	NA	4.8168	10.4707	11.0951	107.086	95.382	93.503	530.212898766	1.67975534869	C4 H6 O5	(S/S/S/R)-malic acid	100 K	None	None	colorless	None	None	None	None	E.N.Kotelnikova, A.I.Isakov, H.Lorenz
NEDRAP	RACEMIC	NC_ND_NI	Strict definition of kryptoracemate	KRYPTORACEMIC	NO	P212121	19	TRUE	FALSE	6.31	2	1	12	['C']	12	8	6	6	0	[[(1, 'RSRRSR'), (1, 'SRSSRS')]]	[2]	[2]	['racemic']	['C1']	2	2.0	8.0	RAC-1	contains following chiral atom(s)C	NA	6.9986	12.1754	53.584	90.0	90.0	90.0	4565.93306591	1.29903310311	C24 H30 O8	rac-3,3-bis(Methoxycarbonyl)-18-oxo-5Î±-androst-6-en-11,17-dione	None	None	None	colorless	None	None	None	None	M.Drouin, M.Couturier, P.Deslongchamps
NEHPIZ01	RACEMIC	NC_ND_NI	Strict definition of kryptoracemate + achiral molecule	KRYPTORACEMIC	NO	P21	4	TRUE	FALSE	3.34	2	1	4	['C']	4	4	2	2	0	[[(1, 'SS'), (1, 'RR')]]	[2]	[2]	['racemic']	['C1']	4	2.0	4.0	RAC-1	contains following chiral atom(s)C	NA	4.8116	23.0797	7.6462	90.0	101.077	90.0	833.29360425	1.67503232408	C4 H6 O6,C1 H4 N2 O1	(+-)-Tartaric acid urea	at 100 K	None	155-159 deg.C (dec.)	colorless	None	None	water	None	R.G.Kostyanovsky, V.R.Kostyanovsky, G.K.Kadorkina
NEPHCL	RACEMIC	NC_ND_I	Strict definition of kryptoracemate + achiral molecule	KRYPTORACEMIC	NO	P21	4	TRUE	FALSE	3.2	2	1	4	['C']	4	4	2	2	0	[[(1, 'SR'), (1, 'RS')]]	[2]	[2]	['racemic']	['C1']	4	2.0	4.0	RAC-1	contains following chiral atom(s)C	NA	14.519	9.456	7.433	90.0	103.5	90.0	992.292747908	1.25618840235	C9 H14 N1 O1 1+,Cl1 1-	2-Amino-1-phenyl-1-propanol hydrochloride	None	None	None	None	None	None	None	None	H.Hebert
NEQCAO	RACEMIC	NC_ND_NI	Strict definition of kryptoracemate	KRYPTORACEMIC	NO	C2	5	TRUE	FALSE	11.19	2	1	4	['C']	4	4	2	2	0	[[(1, 'SR'), (1, 'RS')]]	[2]	[2]	['racemic']	['C1']	2	2.0	8.0	RAC-1	contains following chiral atom(s)C	NA	12.0635	9.7402	25.188	90.0	98.39	90.0	2927.93841178	1.31717836518	C15 H18 N2 O4	Octahydroindolizin-8-yl p-nitrobenzoate	at 153 K	None	141-144deg.C	yellow	None	None	None	None	P.Magnus, A.I.Padilla
NEQJAX	RACEMIC	NC_ND_NI	Strict definition of kryptoracemate + achiral molecule	KRYPTORACEMIC	NO	P21	4	TRUE	FALSE	19.09	2	1	8	['C']	8	4	4	4	0	[[(1, 'RRSR'), (1, 'SSRS')]]	[2]	[2]	['racemic']	['C1']	3	2.0	4.0	RAC-1	contains following chiral atom(s)C	NA	8.954	30.616	10.213	90.0	109.783	90.0	2634.50988921	1.23471517082	C25 H28 N2 O7,0.25(C1 H2 Cl2)	3a-hydroxy-5-[(4-methoxyphenyl)methyl]-6a-methyl-4-(2-methylpropyl)-3-(4-nitrophenyl)tetrahydro-1H-furo[3,4-c]pyrrole-1,6(3H)-dione dichloromethane solvate	173 K	None	None	colorless	None	None	None	None	P.C.B.Page, R.L.Goodyear, A.E.Horton, Yohan Chan, R.Karim, M.A.OConnell, C.Hamilton, A.M.Z.Slawin, B.R.Buckley, S.M.Allin
NEZLOV	RACEMIC	NC_ND_NI	Strict definition of kryptoracemate	KRYPTORACEMIC	NO	P212121	19	TRUE	FALSE	10.54	2	1	6	['C']	6	4	3	3	0	[[(1, 'RRR'), (1, 'SSS')]]	[2]	[2]	['racemic']	['C1']	2	2.0	8.0	RAC-1	contains following chiral atom(s)C	NA	12.0031	23.616	28.157	90.0	90.0	90.0	7981.52990671	1.271383658	C46 H45 N5 O6	21,22(N,N-Dicarbonyl-N-phenyl)-8,12-bis(2-(methoxycarbonyl)ethyl)-2,7,13,17-tetramethyl-18-vinyl-2,21,22,23-tetrahydrobenzo[b]porphyrin	at 100 K	None	None	red	None	None	None	None	A.F.Uchoa, K.T.de Oliveira, M.S.Baptista, A.J.Bortoluzzi, Y.Iamamoto, O.A.Serra
NIBXEE	RACEMIC	NC_ND_NI	Strict definition of kryptoracemate	KRYPTORACEMIC	NO	P21	4	TRUE	FALSE	6.23	2	1	2	['C']	2	2	1	1	0	[[(1, 'S'), (1, 'R')]]	[2]	[2]	['racemic']	['C1']	2	2.0	4.0	RAC-1	contains following chiral atom(s)C	NA	12.7853	7.0167	15.4215	90.0	95.718	90.0	1376.58852462	1.34284348157	C17 H14 N2 O2	1-[(oxiran-2-yl)methyl]-3-phenylquinoxalin-2(1H)-one	200 K	None	None	colorless	None	None	ethanol	None	N.Abad, Y.El Bakri, J.Sebhaoui, Y.Ramli, E.M.Essassi, J.T.Mague
NIHFER	RACEMIC	NC_ND_NI	Strict definition of kryptoracemate	KRYPTORACEMIC	NO	P21	4	TRUE	FALSE	3.76	2	1	4	['C']	4	4	2	2	0	[[(1, 'SS'), (1, 'RR')]]	[2]	[2]	['racemic']	['C1']	2	2.0	4.0	RAC-1	contains following chiral atom(s)C	NA	8.0061	12.2611	18.0754	90.0	100.975	90.0	1741.89402576	1.21415949855	C21 H22 N2 O1	1,3-Dibenzyl-1,3,3a,4,7,7a-hexahydro-2H-benzimidazol-2-one	at 273 K	None	None	colorless	None	None	None	None	K.Dhara, G.C.Midya, J.Dash
NIJGIW	RACEMIC	NC_ND_NI	Strict definition of kryptoracemate	KRYPTORACEMIC	NO	C2	5	TRUE	FALSE	5.4	2	1	12	['C']	12	8	6	6	0	[[(1, 'RSRRSS'), (1, 'SRSSRR')]]	[2]	[2]	['racemic']	['C1']	2	2.0	8.0	RAC-1	contains following chiral atom(s)C	NA	11.301	11.863	29.59	90.0	101.02	90.0	3893.79830697	1.24331613874	C20 H28 O6	7-(Ethoxycarbonyl)-2-methyl-1,7-bis(methoxycarbonyl)tricyclo(6.3.1.05,12)dodec-3-ene	None	None	159-161deg.C	white	None	None	None	y(O2) is -0.1809,7, not 0.1809,7; y(C21) is 0.2244,10, not -0.2244,10	Chai Ji-Jie, He Cun-Heng, Li Ming, Zhang Lu-Yan, Chen Shi-Zhi, Yang Wen-Qian, Huang Liang
NILYIR	SCALEMIC	NC_ND_NI	Unbalanced Kryptoracemate	KRYPTORACEMIC	NO	P21	4	TRUE	FALSE	6.27	3	1	6	['C']	6	6	2	4	0	[[(2, 'SS'), (1, 'RR')]]	[2]	[3]	['scalemic']	['C1']	3	3.0	6.0	scal-3-attention could contain stereoisomer	contains following chiral atom(s)C	NA	10.118	17.381	14.942	90.0	109.705	90.0	2473.83843101	1.65640373324	C13 H19 N1 O2 S1 Se2	3-Propyl-4-(p-toluenesulfonylamino)-1,2-diselenolane	at 296 K	None	128deg.C	colorless	None	None	chloroform	None	D.Sureshkumar, S.Koutha, S.Chandrasekaran
NINROU	RACEMIC	NC_ND_NI	Strict definition of kryptoracemate	KRYPTORACEMIC	NO	P212121	19	TRUE	FALSE	2.75	2	1	4	['C']	4	4	2	2	0	[[(1, 'SS'), (1, 'RR')]]	[2]	[2]	['racemic']	['C1']	2	2.0	8.0	RAC-1	contains following chiral atom(s)C	NA	9.267	10.621	29.8392	90.0	90.0	90.0	2936.91750103	1.26348054995	C18 H17 N1 O2	(-)-(2S,4S)-4-(1H-indol-3-yl)-2-methyl-chroman-5-ol (+)-(2R,4R)-4-(1H-indol-3-yl)-2-methyl-chroman-5-ol	100 K	None	None	None	None	None	None	None	Liping Lin, Nan Jiang, Huimin Wu, Yaning Mei, Jie Yang, Renxiang Tan
NISMUX02	RACEMIC	NC_ND_NI	Strict definition of kryptoracemate	KRYPTORACEMIC	NO	P212121	19	TRUE	FALSE	4.92	2	1	2	['C']	2	2	1	1	0	[[(1, 'S'), (1, 'R')]]	[2]	[2]	['racemic']	['C1']	2	2.0	8.0	RAC-1	contains following chiral atom(s)C	NA	6.2067	7.9665	23.644	90.0	90.0	90.0	1169.0935527	1.91990980964	C4 H2 Cl2 O3	3,4-dichloro-5-hydroxyfuran-2(5H)-one	150 K	None	None	colorless	None	None	None	None	O.A.Lodochnikova, R.M.Khakimov, L.Z.Latypova, A.R.Kurbangalieva, I.A.Litvinov
NITSUH	RACEMIC	NC_ND_NI	Strict definition of kryptoracemate	KRYPTORACEMIC	NO	P1	1	TRUE	FALSE	4.16	4	1	12	['C']	12	8	6	6	0	[[(2, 'RRR'), (2, 'SSS')]]	[2]	[4]	['racemic']	['C1']	4	4.0	4.0	RAC-2	contains following chiral atom(s)C	NA	7.4592	14.1525	16.6451	90.0	90.0	90.0	1757.16208619	1.52436321425	C20 H19 Br1 O4	ethyl 2-(4-bromobenzene-1-carbonyl)-3-hydroxy-3-methyl-2,3-dihydro-1H-indene-1-carboxylate	296.1 K	None	None	light colorless	None	None	None	None	Wanyao Hu, Cong Zhang, Jie Huang, Yingying Guo, Zhenqian Fu, Wei Huang
NIVGEE	RACEMIC	NC_ND_NI	Strict definition of kryptoracemate	KRYPTORACEMIC	NO	P21	4	TRUE	FALSE	10.71	2	1	4	['C']	4	4	2	2	0	[[(1, 'SR'), (1, 'RS')]]	[2]	[2]	['racemic']	['C1']	2	2.0	4.0	RAC-1	contains following chiral atom(s)C	NA	5.2723	38.903	6.3631	90.0	111.102	90.0	1217.60415205	1.14727178496	C13 H22 O2	(1R*,2R*,3E)-3-(Cyclohexylmethylene)-2-hydroxymethyl-1-cyclopentanol	at 163K	None	107deg.C	white	None	None	None	None	G.A.Molander, W.H.Retsch
NIWHUX	RACEMIC	NC_ND_NI	Strict definition of kryptoracemate	KRYPTORACEMIC	NO	P21	4	TRUE	FALSE	5.74	2	1	2	['C']	2	2	1	1	0	[[(1, 'S'), (1, 'R')]]	[2]	[2]	['racemic']	['C1']	2	2.0	4.0	RAC-1	contains following chiral atom(s)C	NA	5.9569	27.197	8.9521	90.0	100.74	90.0	1424.92252715	1.19489307554	C14 H24 O4	8-Methoxy-1-oxacyclotetradeca-2,13-dione	at 273 K	None	None	None	None	None	None	None	S.Erhardt, S.A.Macgregor, K.J.McCullough, K.Savill, B.J.Taylor
NIWHUZ	RACEMIC	NC_ND_NI	Strict definition of kryptoracemate	KRYPTORACEMIC	NO	P212121	19	TRUE	FALSE	4.57	2	1	16	['C']	16	16	8	8	0	[[(1, 'SRSRSRSR'), (1, 'RSRSRSRS')]]	[2]	[2]	['racemic']	['C1']	2	2.0	8.0	RAC-1	contains following chiral atom(s)C	NA	9.3546	17.5406	27.159	90.0	90.0	90.0	4456.3925747	1.17907180138	C28 H29 N1 O1	N-{2-[heptacyclo[14.2.1.17,10.02,15.03,14.05,12.06,11]icosa-3(14),4,12-trien-4-yl]phenyl}acetamide	296 K	None	None	colorless	None	None	None	None	P.Annamalai, Huan-Chang Hsiao, S.Raju, Yi-Hsuan Fu, Pei-Ling Chen, Jia-Cherng Horng, Yi-Hung Liu, Shih-Ching Chuang
NIXFUY	RACEMIC	NC_D_I	Strict definition of kryptoracemate + achiral molecule	KRYPTORACEMIC	NO	P21	4	TRUE	TRUE	7.13	4	1	8	['C']	8	8	2	6	0	[[(3, 'SS'), (1, 'RR')]]	[2]	[4]	['racemic']	['C1']	16	4.0	8.0	RAC-2	contains following chiral atom(s)C	NA	13.4967	18.0291	15.8187	90.0	107.072	90.0	3679.60770781	1.28479289091	C19 H23 F1 N1 1+,2(H2 O1),Cl1 1-	1-(2-fluoro-1,2-diphenylethyl)piperidin-1-ium chloride dihydrate	150 K	None	None	colorless	None	None	None	None	G.Pupo, A.C.Vicini, D.M.H.Ascough, F.Ibba, K.E.Christensen, A.L.Thompson, J.M.Brown, R.S.Paton, V.Gouverneur
NOBKUN	RACEMIC	NC_ND_NI	Strict definition of kryptoracemate	KRYPTORACEMIC	NO	P21	4	TRUE	FALSE	3.41	2	1	4	['C']	4	2	2	2	0	[[(1, 'SR'), (1, 'RS')]]	[2]	[2]	['racemic']	['C1']	2	2.0	4.0	RAC-1	contains following chiral atom(s)C	NA	9.9614	11.0463	13.796	90.0	93.8485	90.0	1514.6418903	1.29532032814	C18 H21 N3 O1	4a-hydroxy-8-methyl-2-(pyrrolidin-1-yl)-4,4a,9,9a-tetrahydro-1H-carbazole-3-carbonitrile	103 K	None	None	None	None	None	None	None	J.Frederich
NOFGEU	RACEMIC	NC_ND_NI	Strict definition of kryptoracemate	KRYPTORACEMIC	NO	P1	1	TRUE	FALSE	8.56	4	1	20	['C']	20	20	10	10	0	[[(2, 'SSSRS'), (2, 'RRRSR')]]	[2]	[4]	['racemic']	['C1']	4	4.0	4.0	RAC-2	contains following chiral atom(s)C	NA	8.639	10.49	12.391	99.08	96.5	113.88	994.226196971	1.37785875201	C10 H14 N4 O1	2-Methyl-1a,2,4a,5,8,8a,8b,8c-octahydro-1-oxa-2,3,5a,6-tetra-azafuro(1,2,3,4-def)fluorene	at 168 K	None	None	colorless	None	None	n-butanol	None	C.R.Clark, A.G.Blackman, A.Mobinikhaledi, W.A.Redmond, R.T.Weavers
NOLFUP	RACEMIC	NC_ND_NI	Strict definition of kryptoracemate	KRYPTORACEMIC	NO	P21	4	TRUE	FALSE	3.94	4	1	16	['C']	16	8	8	8	0	[[(2, 'RSSR'), (2, 'SRRS')]]	[2]	[4]	['racemic']	['C2']	4	4.0	8.0	RAC-2	contains following chiral atom(s)C	NA	13.846	12.5389	15.34	90.0	112.945	90.0	2452.51647126	1.31250916001	C16 H18 O2	1,2,3,4,5,6-Hexahydro-2a,4a-(ethano)cyclopenta(fg)acenaphthylene-3,9-diol	at 173 K	None	166 deg.C	colorless	polymorph II	None	by sublimation	None	R.Savinsky, H.Hopf, I.Dix, P.G.Jones
NOSVOG	SCALEMIC	NC_D_I	Unbalanced Kryptoracemate -contains also an other enantiomer in enantiopure proportion + achiral molecule	KRYPTORACEMIC	NO	P21	4	TRUE	TRUE	11.27	7	2	71	['C']	71	67	37	34	0	[[(2, 'S'), (1, 'R')], [(4, 'SRSRSRRSRRRSRSSRS')]]	[2, 1]	[3, 4]	['scalemic', 'chiral']	['C1']	17	1.0	2.0	Wa-could be Diast	contains following chiral atom(s)C	NA	20.48	43.9	27.75	90.0	100.5	90.0	24531.470536	1.22625901755	4(C66 H76 Cl2 N9 O25 1+),3(C6 H14 O2),2(C6 H5 O7 3-),3(C2 H3 O2 1-),127(H2 O1),5(H3 O1 1+)	tetrakis(Balhimycin) pentaoxonium dicitrate triacetate 2-methyl-2,4-pentanediol hydrate	at 100 K	None	None	colorless	None	None	None	Hydrogen atoms have been removed due to programme problems, however are available on request. Most of the water oxygen atoms have been suppressed	M.Schafer, G.M.Sheldrick, T.R.Schneider, L.Vertesy
NOTRET	RACEMIC	NC_D_I	Contains also at least an other enantiomer in enantiopure proportion + achiral molecule	KRYPTORACEMIC	NO	P21	4	TRUE	TRUE	5.22	4	2	4	['C']	4	2	1	3	0	[[(1, 'S'), (1, 'R')], [(2, 'S')]]	[2, 1]	[2, 2]	['racemic', 'chiral']	['C1']	5	2.0	4.0	Wa-could be Diast	contains following chiral atom(s)C	NA	7.2	13.998	20.724	90.0	97.17	90.0	2072.34768685	1.33164304712	C13 H13 N2 O4 1-,C8 H12 N1 1+,0.5(H2 O1)	(S)-1-Phenylethylammonium rac-4-cyano-2-ethyl-2-(4-nitrophenyl)butanoate hemihydrate	None	None	97-99deg.C	None	None	None	None	None	O.Achmatowicz, I.Malinowska, B.Szechner, J.K.Maurin
NUBKEA	RACEMIC	NC_ND_NI	Strict definition of kryptoracemate	KRYPTORACEMIC	NO	P21	4	TRUE	FALSE	6.2	2	1	2	['C']	2	2	1	1	0	[[(1, 'S'), (1, 'R')]]	[2]	[2]	['racemic']	['C1']	2	2.0	4.0	RAC-1	contains following chiral atom(s)C	NA	4.739	22.424	12.667	90.0	92.72	90.0	1344.57180275	1.46360181255	C16 H12 N2 O4	7-(Î±-Hydroxy-m-nitrobenzyl)quinolin-8-ol	at 170 K	None	166-167deg.C	yellow	None	None	light petroleum/ethyl acetate	None	S.Faizi, B.S.Siddiqui, R.Saleem, F.Akhtar, K.A.Khan, S.A.Khan, S.Siddiqui, M.Parvez, M.I.Choudhary
NUCLIG	RACEMIC	NC_ND_NI	Strict definition of kryptoracemate	KRYPTORACEMIC	NO	P1	1	TRUE	FALSE	3.0	2	1	4	['C']	4	4	2	2	0	[[(1, 'SR'), (1, 'RS')]]	[2]	[2]	['racemic']	['C1']	2	2.0	2.0	RAC-1	contains following chiral atom(s)C	NA	10.136	10.735	10.042	114.83	109.99	80.28	931.506051334	1.3042044907	C18 H20 Cl1 N1 O5	N-(Isopropyl)-3-(4-chlorobenzoyl)-4-ethoxycarbonylmethylpyrrolidine-2,5-dione	None	None	107.0-108.0deg.C	colorless	None	None	hexane/diethyl ether	None	I.Furukawa, T.Abe, H.Fujisawa, T.Ohta
NUCWUD	RACEMIC	NC_ND_NI	Strict definition of kryptoracemate + achiral molecule	KRYPTORACEMIC	NO	P212121	19	TRUE	FALSE	8.36	2	1	6	['C']	6	4	3	3	0	[[(1, 'SRR'), (1, 'RSS')]]	[2]	[2]	['racemic']	['C1']	4	2.0	8.0	RAC-1	contains following chiral atom(s)C	NA	11.764	17.37	23.555	90.0	90.0	90.0	4813.2447174	1.33299518581	C22 H17 Cl1 N2 O3 S1,C3 H6 O1	6-Benzoyl-5-hydroxy-5-methyl-3-oxo-7-(o-chlorophenyl)-8-cyano-2,3,4,5,6,7-hexahydrothiazolo(3,2-a)pyridine acetone solvate	at 20 deg.C	None	215-217deg.C	colorless	None	None	None	The unit cell parameters given in the paper (a=14.858,b=6.5382 and c=21.631) are incorrect	S.G.Krivokolysko, A.N.Chernega, E.B.Rusanov, V.P.Litvinov
NUFQAI	RACEMIC	NC_ND_NI	Strict definition of kryptoracemate	KRYPTORACEMIC	NO	P212121	19	TRUE	FALSE	4.66	2	1	2	['C']	2	2	1	1	0	[[(1, 'S'), (1, 'R')]]	[2]	[2]	['racemic']	['C1']	2	2.0	8.0	RAC-1	contains following chiral atom(s)C	NA	11.88	16.051	26.14	90.0	90.0	90.0	4984.5289032	1.29250401235	C29 H25 Cl1 N2 O3	Ethyl 1-benzyl-5-(4-chlorophenyl)-2-methyl-4-(2-oxo-2,3-dihydro-1H-indol-3-yl)-1H-pyrrole-3-carboxylate	296.1 K	None	None	colorless	None	None	ethanol	None	T.Vivekanand, P.Vinoth, B.Agieshkumar, N.Sampath, A.Sudalai, J.Carlos Menendez, V.Sridharan
NUGVER	RACEMIC	NC_ND_NI	Strict definition of kryptoracemate	KRYPTORACEMIC	NO	P1	1	TRUE	FALSE	5.08	4	1	8	['C']	8	8	4	4	0	[[(2, 'SR'), (2, 'RS')]]	[2]	[4]	['racemic']	['C1']	4	4.0	4.0	RAC-2	contains following chiral atom(s)C	NA	7.98275	16.7357	16.7367	86.737	76.2	76.208	2108.82091592	1.36221661364	C24 H20 N2 O4 S1	1-((4-Methylphenyl)sulfonyl)-2-phenyl-1,2,3,10b-tetrahydropyrimido[2,1-a]isoindole-4,6-dione	at 298.1 K	None	225.0-225.5 deg.C	colorless	None	None	None	None	S.Yamada, Y.Takahashi
NULBIH	RACEMIC	NC_ND_NI	Strict definition of kryptoracemate	KRYPTORACEMIC	NO	P21	4	TRUE	FALSE	4.28	6	1	12	['C']	12	12	6	6	0	[[(3, 'SS'), (3, 'RR')]]	[2]	[6]	['racemic']	['C1']	6	6.0	12.0	RAC-2	contains following chiral atom(s)C	NA	10.508	9.5075	33.98	90.0	96.81	90.0	3370.81478831	1.31511892969	C9 H18 O4 S1	(2S,5S)-5-t-butyl-2-(hydroxymethyl)-1,3-oxathiane 3,3-dioxide	293 K	None	None	None	None	None	neat	None	Daniel Weingand, C.Kiefer, J.Podlech
NUPQAR	RACEMIC	NC_ND_NI	Strict definition of kryptoracemate	KRYPTORACEMIC	NO	P212121	19	TRUE	FALSE	3.5	2	1	2	['C']	2	2	1	1	0	[[(1, 'S'), (1, 'R')]]	[2]	[2]	['racemic']	['C1']	2	2.0	8.0	RAC-1	contains following chiral atom(s)C	NA	9.1301	10.2026	24.8379	90.0	90.0	90.0	2313.66921859	1.29916559651	C15 H14 O2	3-(1-Hydroxy-2-phenylprop-2-en-1-yl)phenol	at 100 K	None	None	colorless	None	None	ethyl acetate/hexane	None	I.Caracelli, J.Zukerman-Schpector, F.V.Singh, H.A.Stefani, E.R.T.Tiekink
NUYTAC	RACEMIC	NC_ND_NI	Strict definition of kryptoracemate	KRYPTORACEMIC	NO	P21	4	TRUE	FALSE	4.96	4	1	24	['C']	24	24	12	12	0	[[(2, 'SSSSSS'), (2, 'RRRRRR')]]	[2]	[4]	['racemic']	['C2']	4	4.0	8.0	RAC-2	contains following chiral atom(s)C	NA	18.4	9.602	22.277	90.0	109.98	90.0	3698.9392008	1.2225436297	C18 H28 O6	4,7;13,16-Diepoxy-9,18-dimethyl-1,10-dioxacyclo-octadecane-2,11-dione	None	None	None	colorless	None	None	None	None	M.Kalesse, R.Wartchow
OBAVIZ	RACEMIC	NC_ND_I	Strict definition of kryptoracemate + achiral molecule	KRYPTORACEMIC	NO	P21212	18	TRUE	FALSE	6.31	2	1	2	['C']	2	2	1	1	0	[[(1, 'S'), (1, 'R')]]	[2]	[2]	['racemic']	['C1']	4	2.0	8.0	RAC-1	contains following chiral atom(s)C	NA	14.64	17.987	6.291	90.0	90.0	90.0	1656.60701688	1.53626867036	C5 H9 F3 N1 O1 1+,Cl1 1-	2-(trifluoromethyl)morpholin-4-ium chloride	293 K	None	None	colorless	None	None	None	None	A.V.Denisenko, A.P.Mityuk, O.O.Grygorenko, D.M.Volochnyuk, O.V.Shishkin, A.A.Tolmachev, P.K.Mykhailiuk
OBUWUG	RACEMIC	NC_ND_NI	Strict definition of kryptoracemate	KRYPTORACEMIC	NO	P21	4	TRUE	FALSE	7.34	2	1	2	['C']	2	2	1	1	0	[[(1, 'S'), (1, 'R')]]	[2]	[2]	['racemic']	['C1']	2	2.0	4.0	RAC-1	contains following chiral atom(s)C	NA	5.715	39.165	5.8138	90.0	114.065	90.0	1188.18733906	1.45516171795	C14 H12 O3 S1	4-(biphenyl-4-yl)-1,3,2-dioxathiolane 2-oxide	100 K	None	None	colorless	None	None	None	None	V.Laserna, E.Martin, E.C.Escudero-Adan, A.W.Kleij
OCANUD	RACEMIC	NC_ND_I	Strict definition of kryptoracemate + achiral molecule	KRYPTORACEMIC	NO	P1	1	TRUE	FALSE	3.86	2	1	4	['C']	4	4	2	2	0	[[(1, 'SR'), (1, 'RS')]]	[2]	[2]	['racemic']	['C1']	8	1.0	1.0	RAC-1	contains following chiral atom(s)C	NA	7.1961	9.6892	15.6136	84.76	83.045	88.619	1076.02916127	1.50146935054	2(C19 H23 F2 N4 O3 1+),O4 S1 2-,5(H2 O1)	Bis[(2R,6S)-4-(5-amino-3-carboxy-1-cyclopropyl-6,8-difluoro-4-oxo-1,4-dihydroquinolin-7-yl)-2,6-dimethylpiperazin-1-ium] sulfate pentahydrate	at 173 K	None	None	green	None	None	None	None	Tao Li, Lin Yang, Yuan Cheng Wang, Qiang Lian
OGELET	RACEMIC	NC_ND_NI	Strict definition of kryptoracemate	KRYPTORACEMIC	NO	P21	4	TRUE	FALSE	9.0	2	1	4	['C']	4	4	2	2	0	[[(1, 'SR'), (1, 'RS')]]	[2]	[2]	['racemic']	['C1']	2	2.0	4.0	RAC-1	contains following chiral atom(s)C	NA	4.7793	79.933	5.7458	90.0	106.038	90.0	2109.59871004	1.14459675638	C22 H37 N1 O3	N-(1,4-Dihydroxy-4-phenylbutan-2-yl)dodecanamide	at 93 K	None	None	colorless	None	None	None	None	M.Ueno, Yi-Yong Huang, A.Yamano, Shu Kobayashi
OGESAX	RACEMIC	NC_ND_NI	Strict definition of kryptoracemate	KRYPTORACEMIC	NO	P212121	19	TRUE	FALSE	10.85	2	1	4	['C']	4	2	2	2	0	[[(1, 'SS'), (1, 'RR')]]	[2]	[2]	['racemic']	['C1']	2	2.0	8.0	RAC-1	contains following chiral atom(s)C	NA	13.243	14.115	25.059	90.0	90.0	90.0	4684.15219675	1.42521152067	C26 H22 N4 O5 S1	(5-((4-methylphenyl)sulfonyl)-2-oxo-1,2,3,4,5,6-hexahydro-2aH-azepino[5,4,3-cd]indol-2a-yl)(2-nitrophenyl)acetonitrile	100 K	None	None	colorless	None	None	None	None	Seo-Jung Han, Florian Vogt, J.A.May, Shyam Krishnan, M.Gatti, S.C.Virgil, B.M.Stoltz
OHABIK	RACEMIC	NC_ND_NI	Strict definition of kryptoracemate	KRYPTORACEMIC	NO	P21	4	TRUE	FALSE	3.18	2	1	10	['C']	10	6	5	5	0	[[(1, 'SSSRR'), (1, 'RRRSS')]]	[2]	[2]	['racemic']	['C1']	2	2.0	4.0	RAC-1	contains following chiral atom(s)C	NA	5.8773	30.253	7.0235	90.0	100.153	90.0	1229.26428963	1.44951505456	C13 H16 O6	dimethyl 6-(hydroxymethyl)-4-oxatricyclo[4.3.0.03,7]non-8-ene-2,3-dicarboxylate	100 K	None	None	colorless	None	None	None	None	P.Camps, D.Lozano, M.Font-Bardia
OHAKIT	RACEMIC	NC_ND_NI	Strict definition of kryptoracemate	KRYPTORACEMIC	NO	P21	4	TRUE	FALSE	4.53	4	1	4	['C']	4	4	2	2	0	[[(2, 'S'), (2, 'R')]]	[2]	[4]	['racemic']	['C1']	4	4.0	8.0	RAC-2	contains following chiral atom(s)C	NA	13.4732	9.5123	19.795	90.0	109.801	90.0	2386.95188208	1.37293521559	C13 H11 Cl1 N2 O1	4-(2-Chlorophenyl)-2-methyl-6-oxo-1,4,5,6-tetrahydropyridine-3-carbonitrile	296 K	None	None	None	None	None	None	None	A.Yadav, A.Verma, S.Patel, A.Kumar, V.Rathore, Meenakshi, S.Kumar, S.Kumar
OHELIY	RACEMIC	NC_ND_NI	Strict definition of kryptoracemate + achiral molecule	KRYPTORACEMIC	NO	P21	4	TRUE	FALSE	2.09	2	1	6	['C']	6	6	3	3	0	[[(1, 'RRS'), (1, 'SSR')]]	[2]	[2]	['racemic']	['C1']	4	2.0	4.0	RAC-1	contains following chiral atom(s)C	NA	8.9688	8.0063	10.9628	90.0	106.015	90.0	756.652913235	1.55512468462	C6 H9 N1 O4,H2 O1	ammonio(2-carboxycyclopropyl)acetate monohydrate	100 K	None	None	colorless	None	None	None	None	S.Lindeman, N.J.Wallock, W.A.Donaldson
OHOMIJ	RACEMIC	NC_ND_NI	Strict definition of kryptoracemate	KRYPTORACEMIC	NO	P21	4	TRUE	FALSE	7.94	4	1	8	['C']	8	4	4	4	0	[[(2, 'SR'), (2, 'RS')]]	[2]	[4]	['racemic']	['C1']	4	4.0	8.0	RAC-2	contains following chiral atom(s)C	NA	14.7772	11.1085	16.6848	90.0	92.405	90.0	2736.43961143	1.32570919666	C12 H18 B1 F2 N1 O3	Difluoro-(4-methyl-2-oxo-3-(pyrrolidin-1-ylcarbonyl)hex-5-en-3-olato)-boron	100 K	None	None	colorless	None	None	None	None	Jan Robach, K.Harms, U.Koert
OKATAW	RACEMIC	NC_ND_NI	Strict definition of kryptoracemate	KRYPTORACEMIC	NO	P212121	19	TRUE	FALSE	6.76	2	1	4	['C']	4	2	2	2	0	[[(1, 'SR'), (1, 'RS')]]	[2]	[2]	['racemic']	['C1']	2	2.0	8.0	RAC-1	contains following chiral atom(s)C	NA	7.3985	11.859	26.749	90.0	90.0	90.0	2346.92546881	1.37692932494	C13 H13 N3 O2	4a-Acetyl-4-methylene-1,3,4,4a,5,9b-hexahydro-2H-pyrimido[5,4-b]indol-2-one	at 296 K	None	None	yellow	None	None	None	None	Yu-wei Ren, Xuerui Wang, Weixia Wang, Bing Li, Zong-jun Shi, Wei Zhang
OKUXOI	RACEMIC	NC_ND_NI	Strict definition of kryptoracemate	KRYPTORACEMIC	NO	P1	1	TRUE	FALSE	8.85	2	1	4	['C']	4	4	2	2	0	[[(1, 'SS'), (1, 'RR')]]	[2]	[2]	['racemic']	['C1']	2	2.0	2.0	RAC-1	contains following chiral atom(s)C	NA	11.489	11.669	11.855	104.311	116.912	98.965	1305.66266221	1.22243792595	C35 H28 O2	1,2,3,4,5-Pentaphenylpentane-1,5-dione	at 298 K	None	None	colorless	None	None	None	None	J.D.Mufato, D.R.Vega, J.M.Aguirre, D.J.de la Faba, B.Lantano
OLAJES	RACEMIC	NC_ND_NI	Strict definition of kryptoracemate + achiral molecule	KRYPTORACEMIC	NO	P1	1	TRUE	FALSE	2.95	2	1	2	['C']	2	2	1	1	0	[[(1, 'S'), (1, 'R')]]	[2]	[2]	['racemic']	['C1']	4	2.0	2.0	RAC-1	contains following chiral atom(s)C	NA	9.969	10.512	11.253	80.696	85.436	68.779	1084.53907619	1.43113254007	C23 H19 Br1 N2 O2,C1 H4 O1	N-Benzyl-2-(2-bromophenyl)-N-(2-oxoindolin-3-yl)acetamide methanol solvate	140 K	None	467 K	colorless	None	None	methanol	None	A.R.Maddirala, P.R.Andreana
OLOHAY	RACEMIC	NC_ND_NI	Strict definition of kryptoracemate	KRYPTORACEMIC	NO	P1	1	TRUE	FALSE	6.6	2	1	2	['C']	2	0	1	1	0	[[(1, 'S'), (1, 'R')]]	[2]	[2]	['racemic']	['C1']	2	2.0	2.0	RAC-1	contains following chiral atom(s)C	NA	10.16	10.785	11.942	66.369	75.928	72.005	1129.44337913	1.29220295229	C24 H25 N1 O7	Methyl (+-)-1-ethyl-2-hydroxy-4-(4-methoxybenzoyl)-5-(4-methoxyphenyl)-3-oxo-2,3-dihydro-1H-pyrrole-2-acetate	at 293 K	None	435K	colorless	None	None	ethanol	None	M.Akkurt, S.Ozturk, H.Ungoren, M.Sacmaci, Hoong-Kun Fun, Y.Akcamur
OLOKOR	RACEMIC	NC_ND_NI	Strict definition of kryptoracemate	KRYPTORACEMIC	NO	P1	1	TRUE	FALSE	3.54	2	1	6	['C']	6	6	3	3	0	[[(1, 'RRR'), (1, 'SSS')]]	[2]	[2]	['racemic']	['C1']	2	2.0	2.0	RAC-1	contains following chiral atom(s)C	NA	9.3504	9.6898	13.9511	93.247	99.329	114.444	1124.6797525	1.32169627671	C26 H29 N3 O2 S1	N-methyl-2-(3-methyl-2-phenyl-1,2,3,4-tetrahydroquinolin-4-yl)-N-(methylsulfonyl)-N'-phenylethanimidamide	100 K	None	None	colorless	None	None	None	None	R.R.Singh, Rai-Shung Liu
ONANIC01	RACEMIC	NC_D_I	Contains also at least an other enantiomer in enantiopure proportion	KRYPTORACEMIC	NO	P1	1	TRUE	TRUE	4.42	6	2	6	['C']	6	4	5	1	0	[[(1, 'S'), (1, 'R')], [(4, 'R')]]	[2, 1]	[2, 4]	['racemic', 'chiral']	['C1']	6	2.0	2.0	Wa-could be Diast	contains following chiral atom(s)C	NA	11.4197	15.8645	16.2611	66.72	86.95	71.548	2558.26357316	1.37235500107	2(C23 H33 N2 O6 1+),C6 H6 O7 2-	bis(1-((4-hydroxytetrahydro-2H-pyran-4-yl)methyl)-4-(((4-(tetrahydrofuran-3-yloxy)-1,2-benzoxazol-3-yl)oxy)methyl)piperidinium) 2-(carboxymethyl)-2-hydroxysuccinate	296 K	None	None	colorless	None	None	None	None	D.W.Widlicka, J.C.Murray, K.J.Coffman, Chunguang Xiao, M.A.Brodney, J.P.Rainville, B.Samas
ONODAY	RACEMIC	NC_ND_NI	Strict definition of kryptoracemate + achiral molecule	KRYPTORACEMIC	NO	P212121	19	TRUE	FALSE	4.64	2	1	2	['C']	2	2	1	1	0	[[(1, 'S'), (1, 'R')]]	[2]	[2]	['racemic']	['C1']	4	2.0	8.0	RAC-1	contains following chiral atom(s)C	NA	16.2716	21.2062	10.0994	90.0	90.0	90.0	3484.88688431	1.20215584446	C11 H15 N1 O1,C7 H6 O3	salicylic acid 3-methyl-2-phenylbutanamide	296 K	None	None	colorless	None	None	None	None	U.B.Rao Khandavilli, M.Lusi, B.R.Bhogala, A.R.Maguire, M.Stein, S.E.Lawrence
ONODAY01	RACEMIC	NC_ND_NI	Strict definition of kryptoracemate + achiral molecule	KRYPTORACEMIC	NO	P21	4	TRUE	FALSE	10.89	4	1	4	['C']	4	4	2	2	0	[[(2, 'S'), (2, 'R')]]	[2]	[4]	['racemic']	['C1']	8	4.0	8.0	RAC-2	contains following chiral atom(s)C	NA	9.882	20.953	16.215	90.0	93.913	90.0	3349.61131909	1.25070545092	C11 H15 N1 O1,C7 H6 O3	salicylic acid 3-methyl-2-phenylbutanamide	173 K	None	None	colorless	polymorph II	None	None	None	U.B.Rao Khandavilli, M.Lusi, B.R.Bhogala, A.R.Maguire, M.Stein, S.E.Lawrence
OPIMEG	RACEMIC	NC_ND_NI	Strict definition of kryptoracemate	KRYPTORACEMIC	NO	P21	4	TRUE	FALSE	10.33	2	1	2	['C']	2	2	1	1	0	[[(1, 'S'), (1, 'R')]]	[2]	[2]	['racemic']	['C1']	2	2.0	4.0	RAC-1	contains following chiral atom(s)C	NA	8.71	20.24	10.756	90.0	92.98	90.0	1893.6154196	1.42531149281	C18 H18 N2 O9	Ethyl 5-(2-ethoxy-1-hydroxy-2-oxoethylidene)-6-(2-hydroxy-3-nitrophenyl)-4-oxo-1,4,5,6-tetrahydropyridine-2-carboxylate	at 295 K	None	117-9deg. C	red-orange	None	None	None	None	V.A.Mamedov, L.P.Sysoeva, A.M.Murtazina, E.A.Berdnikov, A.T.Gubaidullin, S.F.Kadyrova, E.V.Mironova, I.A.Litvinov
OQABAK	RACEMIC	NC_ND_NI	Strict definition of kryptoracemate + achiral molecule	KRYPTORACEMIC	NO	P21212	18	TRUE	FALSE	6.52	2	1	6	['C']	6	2	3	3	0	[[(1, 'RRS'), (1, 'SSR')]]	[2]	[2]	['racemic']	['C1']	3	2.0	8.0	RAC-1	contains following chiral atom(s)C	NA	19.902	24.903	6.7798	90.0	90.0	90.0	3360.20112678	1.23925229161	C17 H24 O3 Si1,0.5(H2 O1)	4-(Dimethyl(phenyl)silyl)-6-hydroxy-6-methyl-2-oxaspiro[4.4]nonan-1-one hemihydrate	at 100 K	None	None	white	None	None	None	None	H.Y.Harb, K.D.Collins, J.V.G.Altur, S.Bowker, L.Campbell, D.J.Procter
OREKUT	RACEMIC	NC_ND_NI	Strict definition of kryptoracemate	KRYPTORACEMIC	NO	P21	4	TRUE	FALSE	4.39	2	1	10	['C']	10	8	5	5	0	[[(1, 'RSRSS'), (1, 'SRSRR')]]	[2]	[2]	['racemic']	['C1']	2	2.0	4.0	RAC-1	contains following chiral atom(s)C	NA	9.67334	11.20885	18.6086	90.0	94.3265	90.0	2011.92531866	1.26927840211	C22 H28 N2 O4	Ethyl (1R*,2S*,10S*,11R*,12S*)-5-benzyl-9-oxo-15-oxa-5,8-diazatetracyclo[10.2.1.01,10.02,8]pentadecane-11-carboxylate	120 K	None	None	colorless	None	None	None	None	J.D.Firth, P.G.E.Craven, M.Lilburn, Axel Pahl, S.P.Marsden, A.Nelson
OSARUX	RACEMIC	NC_ND_NI	Strict definition of kryptoracemate	KRYPTORACEMIC	NO	P21	4	TRUE	FALSE	4.31	2	1	4	['C']	4	4	2	2	0	[[(1, 'SS'), (1, 'RR')]]	[2]	[2]	['racemic']	['C1']	2	2.0	4.0	RAC-1	contains following chiral atom(s)C	NA	9.6224	20.0124	13.094	90.0	102.589	90.0	2460.85669626	1.22680349518	C27 H26 N4 O3	benzyl (2-(2-(benzoylamino)-1,2,3,4-tetrahydroisoquinolin-1-yl)-1-cyanoethyl)carbamate	120 K	None	None	colorless	None	None	None	None	Yang Wang, Qian Wang, Jieping Zhu
OVIGEG	RACEMIC	NC_ND_I	Contains also at least an other enantiomer in enantiopure proportion	KRYPTORACEMIC	NO	P21	4	TRUE	FALSE	2.5	4	2	6	['C']	6	6	5	1	0	[[(1, 'S'), (1, 'R')], [(2, 'RR')]]	[2, 1]	[2, 2]	['racemic', 'chiral']	['C1']	4	2.0	4.0	Wa-could be Diast	contains following chiral atom(s)C	NA	7.7016	18.1847	8.9733	90.0	101.29	90.0	1232.40317133	1.50500796542	C6 H12 N1 O2 1+,C4 H5 O6 1-	(R/S)-Piperidinium-3-carboxylic acid (2R,3R)-hydrogen tartrate	at 120 K	None	431 K	colorless	None	None	None	None	E.Bartoszak-Adamska, Z.Dega-Szafran, M.Jaskolski, M.Szafran
OXADAU	RACEMIC	NC_ND_NI	Strict definition of kryptoracemate	KRYPTORACEMIC	NO	P21212	18	TRUE	FALSE	6.26	2	1	6	['C']	6	6	3	3	0	[[(1, 'RRS'), (1, 'SSR')]]	[2]	[2]	['racemic']	['C1']	2	2.0	8.0	RAC-1	contains following chiral atom(s)C	NA	20.393	23.8095	10.623	90.0	90.0	90.0	5157.96719917	1.21458356691	C28 H33 N5 O2	Ethyl 4-(1-benzyl-1H-tetrazol-5-yl)-1-cyclohexyl-3-methylene-5-phenylpyrrolidine-2-carboxylate	293 K	None	394 K	colorless	None	None	ethyl acetate/n-hexane	None	A.L.Cardoso, M.S.C.Henriques, J.A.Paixao, T.M.V.D.P.e.Melo
OXATAK02	RACEMIC	NC_ND_NI	Strict definition of kryptoracemate	KRYPTORACEMIC	NO	P21	4	TRUE	FALSE	3.09	4	1	8	['C']	8	8	4	4	0	[[(2, 'SS'), (2, 'RR')]]	[2]	[4]	['racemic']	['C1']	4	4.0	8.0	RAC-2	contains following chiral atom(s)C	NA	10.8601	56.18	10.8603	90.0	114.63	90.0	6023.23591922	1.30053548122	C37 H35 N1 O6	dimethyl 1-(2,4-dimethoxyphenyl)-2-(diphenylmethylene)-1,2,3a,4,5,9b-hexahydro-3H-benzo[g]indole-3,3-dicarboxylate	100 K	None	None	colorless	None	None	None	None	M.Alajarin, Adrian Egea, R.-A.Orenes, Angel Vidal
OYACUO	RACEMIC	NC_ND_NI	Strict definition of kryptoracemate	KRYPTORACEMIC	NO	P21	4	TRUE	FALSE	4.29	2	1	2	['C']	2	2	1	1	0	[[(1, 'S'), (1, 'R')]]	[2]	[2]	['racemic']	['C1']	2	2.0	4.0	RAC-1	contains following chiral atom(s)C	NA	9.7797	15.6795	10.6117	90.0	113.052	90.0	1497.27395206	1.31044902629	C17 H17 N3 S1	5-(4-methylphenyl)-7-phenyl-2,4,5,6-tetrahydro-3H-1,2,4-triazepine-3-thione	100 K	None	None	None	None	None	None	None	A.A.Fesenko, M.S.Grigoriev, A.D.Shutalev
OYUQOQ	RACEMIC	NC_ND_NI	Strict definition of kryptoracemate	KRYPTORACEMIC	NO	P21	4	TRUE	FALSE	5.24	2	1	8	['C']	8	6	4	4	0	[[(1, 'SSRR'), (1, 'RRSS')]]	[2]	[2]	['racemic']	['C1']	2	2.0	4.0	RAC-1	contains following chiral atom(s)C	NA	8.237	21.2108	8.4707	90.0	98.7489	90.0	1462.72445911	1.28226910786	C18 H22 N2 O1	1,12-dimethyl-1,3,4,5,6,11-hexahydro-6,1,5-(epiminopropane[1,3,3]triyl)oxocino[3,4-b]indole	150 K	None	None	colorless	None	None	dichloromethane/n-hexane	None	Fei Tang, M.G.Banwell, A.C.Willis
OZIKAK	RACEMIC	NC_ND_NI	Strict definition of kryptoracemate	KRYPTORACEMIC	NO	P21	4	TRUE	FALSE	4.03	2	1	6	['C']	6	6	3	3	0	[[(1, 'RRS'), (1, 'SSR')]]	[2]	[2]	['racemic']	['C1']	2	2.0	4.0	RAC-1	contains following chiral atom(s)C	NA	9.7928	16.019	10.2459	90.0	108.188	90.0	1526.97920466	1.2585993586	C14 H24 F1 N1 O4	Ethyl 2-((t-butoxycarbonyl)amino)-5-fluorocyclohexanecarboxylate	at 100 K	None	None	colorless	None	None	None	None	L.Kiss, E.Forro, S.Fustero, F.Fulop
PALPAW	RACEMIC	NC_ND_NI	Strict definition of kryptoracemate	KRYPTORACEMIC	NO	P21	4	TRUE	FALSE	5.22	2	1	8	['C']	8	8	4	4	0	[[(1, 'SRSS'), (1, 'RSRR')]]	[2]	[2]	['racemic']	['C1']	2	2.0	4.0	RAC-1	contains following chiral atom(s)C	NA	19.9045	6.9512	22.6091	90.0	105.797	90.0	3010.05367211	1.41574764522	C30 H33 Br1 N2 O7 Si1	2-(4-bromophenyl)-3-butyl-6-(dimethyl(phenyl)silyl)tetrahydro-2H-pyran-4-yl 3,5-dinitrobenzoate	120 K	None	None	colorless	None	None	None	None	N.Gandhamsetty, Soyeon Jee, Sukbok Chang
PAMHAN	RACEMIC	NC_ND_NI	Strict definition of kryptoracemate	KRYPTORACEMIC	NO	P212121	19	TRUE	FALSE	6.24	2	1	6	['C']	6	2	3	3	0	[[(1, 'SRS'), (1, 'RSR')]]	[2]	[2]	['racemic']	['C1']	2	2.0	8.0	RAC-1	contains following chiral atom(s)C	NA	8.56	12.14	25.374	90.0	90.0	90.0	2636.8254816	1.32146722287	C15 H18 O4	rac-(1R,4(2')S,5S)-Spiro[5-phenyl-3,6,8-trioxabicyclo[3.2.1]octane-4,2'-tetrahydropyran]	at 150 K	None	135-137deg.C	colorless	None	None	ethyl acetate/hexane	None	C.D.L.Baker, J.Fawcett, C.D.Insley, D.S.Messenger, C.L.Newland, H.L.Overend, A.B.Patel, M.Shah, B.Vara, D.Virdee, B.J.Rawlings
PAMPOL	RACEMIC	NC_D_I	Contains also at least an other enantiomer in enantiopure proportion	KRYPTORACEMIC	NO	P21	4	TRUE	TRUE	8.14	4	2	4	['C']	4	4	1	3	0	[[(1, 'S'), (1, 'R')], [(2, 'S')]]	[2, 1]	[2, 2]	['racemic', 'chiral']	['C1']	4	2.0	4.0	Wa-could be Diast	contains following chiral atom(s)C	NA	16.749	8.124	17.552	90.0	116.504	90.0	2137.28025159	1.17630066971	C16 H28 N1 O1 1+,C5 H6 N1 O3 1-	1-(3,5-di-t-butyl-2-hydroxyphenyl)ethanaminium 5-oxopyrrolidine-2-carboxylate	150 K	None	None	colorless	None	None	None	None	K.Kodama, N.Hayashi, M.Fujita, T.Hirose
PANCAJ	RACEMIC	NC_ND_NI	Strict definition of kryptoracemate	KRYPTORACEMIC	NO	P21	4	TRUE	FALSE	5.6	2	1	10	['C']	10	4	5	5	0	[[(1, 'SSRSR'), (1, 'RRSRS')]]	[2]	[2]	['racemic']	['C1']	2	2.0	4.0	RAC-1	contains following chiral atom(s)C	NA	12.8881	14.1348	14.5246	90.0	101.103	90.0	2596.4313014	1.3342993053	C29 H32 N2 O7	Diethyl 1,1'',2,2''-tetrahydro-6'-hydroxy-1,1'',6'-trimethyl-2,2''-dioxodispiro(3H-indole-3,1'-cyclohexane-3',3''-(3H)-indole)-2',4'-dicarboxylate	at 298 K	None	204-205 deg.C	colorless	None	None	None	None	F.H.Osman, F.A.El-Samahy, I.S.A.Farag
PDTOMS	SCALEMIC	NC_ND_NI	Unbalanced Kryptoracemate -contains also an other enantiomer in enantiopure proportion	KRYPTORACEMIC	NO	P21	4	TRUE	FALSE	8.5	4	2	23	['C']	23	19	10	13	0	[[(2, 'RRSSRR'), (1, 'SSRRSS')], [(1, 'SSSSS')]]	[2, 1]	[3, 1]	['scalemic', 'chiral']	['C1']	4	2.0	4.0	W1_enantiopure AU	contains following chiral atom(s)C	NA	10.418	19.634	18.685	90.0	104.51	90.0	3700.05537121	1.13814906141	C20 H35 N3,C20 H33 N3	pseudo-racemic Podopetaline ormosanine	None	None	160-1deg.C	None	monoclinic polymorph	None	None	None	R.Misra, W.Wong-Ng, P.-T.Cheng, S.McLean, S.C.Nyburg
PEDJAK	RACEMIC	NC_ND_NI	Strict definition of kryptoracemate	KRYPTORACEMIC	NO	P21	4	TRUE	FALSE	5.58	2	1	8	['C']	8	8	4	4	0	[[(1, 'RRSR'), (1, 'SSRS')]]	[2]	[2]	['racemic']	['C1']	2	2.0	4.0	RAC-1	contains following chiral atom(s)C	NA	10.8694	18.8549	13.4265	90.0	99.179	90.0	2716.41099229	1.11651912702	C30 H36 N2 O2	t-butyl N-benzyl-N-(1,5-dimethyl-2,4-diphenylpyrrolidin-3-yl)carbamate	at 293 K	None	None	yellow	None	None	None	None	M.Vargas-Sanchez, F.Couty, G.Evano, D.Prim, J.Marrot
PEKCIT	RACEMIC	NC_ND_I	Contains also at least an other enantiomer in enantiopure proportion + achiral molecule	KRYPTORACEMIC	NO	P1	1	TRUE	FALSE	8.69	4	2	4	['C']	4	4	1	3	0	[[(1, 'S'), (1, 'R')], [(2, 'S')]]	[2, 1]	[2, 2]	['racemic', 'chiral']	['C1']	6	2.0	2.0	Wa-could be Diast	contains following chiral atom(s)C	NA	9.192	9.7676	17.7719	94.216	90.984	92.364	1589.629343	1.1590133252	C28 H24 N1 O2 1-,C4 H12 N1 1+,C4 H10 O1	2-Methylpropan-2-aminium 3-phenyl-2-(tritylamino)propanoate butan-2-ol solvate	at 173 K	None	None	colorless	None	None	None	None	K.Megumi, F.N.B.M.Arif, S.Matsumoto, M.Akazome
PELDUF	RACEMIC	NC_ND_I	Strict definition of kryptoracemate + achiral molecule	KRYPTORACEMIC	NO	P21	4	TRUE	FALSE	4.31	2	1	2	['P']	0	0	1	1	0	[[(1, 'S'), (1, 'R')]]	[2]	[2]	['racemic']	['C1']	4	2.0	4.0	RAC-1	contains following chiral atom(s)P	NA	9.699	31.163	11.172	90.0	99.38	90.0	3331.58633677	1.31676436218	C14 H23 As1 N2 O1 P1 1+,C24 H20 B1 1-	1,3,5-Trimethyl-4-t-butyl-4-phenyl-2-oxo-1,3-diaza-5-arsa-4-phosphonium tetraphenylborate	at 178 K	None	191 deg.C(dec.)	colorless	None	None	None	None	R.Vogt, P.G.Jones, R.Schmutzler
PENFEV	RACEMIC	NC_ND_NI	Strict definition of kryptoracemate	KRYPTORACEMIC	NO	P21	4	TRUE	FALSE	4.33	2	1	8	['C']	8	6	4	4	0	[[(1, 'SSSS'), (1, 'RRRR')]]	[2]	[2]	['racemic']	['C1']	2	2.0	4.0	RAC-1	contains following chiral atom(s)C	NA	9.4749	20.5466	12.8261	90.0	104.295	90.0	2419.63417087	1.28907977636	C26 H31 N1 O5 S1	Ethyl (4,4-dimethyl-2-((4-methylphenyl)sulfonyl)-2,3,3a,4,5,5a-hexahydro-1H-[1]benzofuro[3',2':1,5]cyclopenta[1,2-c]pyrrol-3-yl)acetate	at 298 K	None	None	colorless	None	None	None	None	S.J.Gharpure, P.Niranjanaa, S.K.Porwala
PENLUS	RACEMIC	NC_ND_NI	Strict definition of kryptoracemate	KRYPTORACEMIC	NO	P212121	19	TRUE	FALSE	3.41	2	1	2	['C']	2	2	1	1	0	[[(1, 'S'), (1, 'R')]]	[2]	[2]	['racemic']	['C1']	2	2.0	8.0	RAC-1	contains following chiral atom(s)C	NA	13.0861	16.7122	17.7248	90.0	90.0	90.0	3876.36980994	1.35801186	C21 H15 Cl2 N3 O1	2-(2-chlorophenyl)-3-{[(2-chlorophenyl)methylidene]amino}-2,3-dihydroquinazolin-4(1H)-one	296 K	None	None	white	None	None	None	None	A.Mandal, B.K.Patel
PENWOV	RACEMIC	NC_ND_NI	Strict definition of kryptoracemate	KRYPTORACEMIC	NO	P1	1	TRUE	FALSE	5.72	2	1	8	['C']	8	6	4	4	0	[[(1, 'SSSS'), (1, 'RRRR')]]	[2]	[2]	['racemic']	['C1']	2	2.0	2.0	RAC-1	contains following chiral atom(s)C	NA	9.992	11.664	11.986	67.826	66.443	71.059	1160.70140375	1.56590858509	C25 H25 Br2 N1 O3	(1-(4-Bromobenzoyldecahydropentaleno-8-pyrrolyl))methyl 4-bromobenzoate	at 193 K	None	None	colorless	None	None	pentane/tetrahydrofuran	None	S.E.Denmark, J.I.Montgomery, L.A.Kramps
PESTOY	RACEMIC	NC_ND_NI	Strict definition of kryptoracemate	KRYPTORACEMIC	NO	C2	5	TRUE	FALSE	6.67	2	1	8	['C']	8	8	4	4	0	[[(1, 'RSSR'), (1, 'SRRS')]]	[2]	[2]	['racemic']	['C1']	2	2.0	8.0	RAC-1	contains following chiral atom(s)C	NA	57.606	6.594	10.648	90.0	95.468	90.0	4026.27996676	1.22246579767	C18 H30 O6 Si1	Ethyl 7-((t-butyl(dimethyl)silyl)oxy)-2,5-dioxooctahydro-2H-cyclohepta[b]furan-3-carboxylate	at 150 K	None	None	colorless	None	None	None	None	J.Priest, M.R.Longland, M.R.J.Elsegood, M.C.Kimber
PEXLOU	RACEMIC	NC_ND_NI	Strict definition of kryptoracemate	KRYPTORACEMIC	NO	P21	4	TRUE	FALSE	6.72	2	1	6	['C']	6	6	3	3	0	[[(1, 'SRS'), (1, 'RSR')]]	[2]	[2]	['racemic']	['C1']	2	2.0	4.0	RAC-1	contains following chiral atom(s)C	NA	8.4006	16.4634	10.1115	90.0	113.356	90.0	1283.8555914	1.28446925692	C14 H16 O4	(+-)-Methyl 2-(2-oxo-5-phenyltetrahydrofuran-3-yl)propanoate	at 293 K	None	79-80deg.C	colorless	None	None	dichloromethane	None	Md.M.Baag, V.G.Puranik, N.P.Argade
PIGBOX	RACEMIC	NC_ND_NI	Strict definition of kryptoracemate	KRYPTORACEMIC	NO	P212121	19	TRUE	FALSE	6.24	2	1	2	['C']	2	2	1	1	0	[[(1, 'S'), (1, 'R')]]	[2]	[2]	['racemic']	['C1']	2	2.0	8.0	RAC-1	contains following chiral atom(s)C	NA	8.379	17.493	17.621	90.0	90.0	90.0	2582.77775799	1.42150436881	C14 H12 O2 S2	3-(1,3-dithiolan-2-ylidene)-6-phenyl-3H-pyran-2(6H)-one	at 293 K	None	126-128 deg.C	colorless	None	None	None	None	Jun Liu, Mang Wang, Bing Li, Qun Liu, Yulong Zhao
PIHPUU	RACEMIC	NC_ND_NI	Strict definition of kryptoracemate	KRYPTORACEMIC	NO	P21	4	TRUE	FALSE	4.79	2	1	4	['C']	4	4	2	2	0	[[(1, 'SR'), (1, 'RS')]]	[2]	[2]	['racemic']	['C1']	2	2.0	4.0	RAC-1	contains following chiral atom(s)C	NA	10.6225	5.2027	17.6456	90.0	104.888	90.0	942.458677369	1.21377118608	C12 H12 O1	2-(prop-2-yn-1-yl)-2,3-dihydro-1H-inden-1-ol	123 K	None	None	colorless	None	None	None	None	N.Iwasawa, S.Watanabe, A.Ario, H.Sogo
PIKZOA	RACEMIC	NC_D_I	Contains also at least an other enantiomer in enantiopure proportion + achiral molecule	KRYPTORACEMIC	NO	P1	1	TRUE	TRUE	8.33	4	2	10	['C']	10	10	6	4	0	[[(1, 'RSSR'), (1, 'SRRS')], [(2, 'R')]]	[2, 1]	[2, 2]	['racemic', 'chiral']	['C1']	8	2.0	2.0	Wa-could be Diast	contains following chiral atom(s)C	NA	11.6886	12.2512	16.2325	82.1	79.328	76.222	2207.914997	1.21233812257	C11 H18 N1 1+,2.37(H2 O1),C36 H39 O8 1-	N,N,N-Trimethyl-1-phenylethanaminium 2,8,14,20-tetraethyl-6,10,12,16,18,22,24-heptahydroxycalix[4]aren-4-olate hydrate	at 173 K	None	None	None	None	None	None	None	N.K.Beyeh, K.Rissanen
PITXUL	RACEMIC	NC_ND_NI	Strict definition of kryptoracemate	KRYPTORACEMIC	NO	P21	4	TRUE	FALSE	13.5	2	1	8	['C']	8	8	4	4	0	[[(1, 'RSSR'), (1, 'SRRS')]]	[2]	[2]	['racemic']	['C1']	2	2.0	4.0	RAC-1	contains following chiral atom(s)C	NA	11.818	23.828	11.016	90.0	107.12	90.0	2964.64495724	1.22896710065	C27 H32 O12	Dimethyl 1-(4-acetoxy-3,5-dimethoxyphenyl)-4,7,9-trimethoxy-8-oxospiro(4.5)deca-6,9-diene-2,3-dicarboxylate	None	None	183-185 deg.C	white	None	None	None	None	H.Setala, A.Pajunen, I.Kilpelainen, G.Brunow
PIWVUN	RACEMIC	NC_ND_NI	Strict definition of kryptoracemate	KRYPTORACEMIC	NO	P21	4	TRUE	FALSE	5.01	4	1	8	['C']	8	8	4	4	0	[[(2, 'SS'), (2, 'RR')]]	[2]	[4]	['racemic']	['C1']	4	4.0	8.0	RAC-2	contains following chiral atom(s)C	NA	9.1332	20.872	22.915	90.0	90.255	90.0	4368.20080395	1.44298378564	C24 H18 N4 O5 S1	cis-2-Amino-5-(benzoyl)-1-((4-nitrophenyl)sulfonyl)-4-phenyl-4,5-dihydro-1H-pyrrole-3-carbonitrile	at 100 K	None	201 deg.C	orange	None	None	None	None	I.V.Magedov, G.Luchetti, N.M.Evdokimov, M.Manpadi, W.F.A.Steelant, S.Van Slambrouck, P.Tongwa, M.Yu.Antipin, A.Kornienko
POCSAE	RACEMIC	NC_ND_NI	Strict definition of kryptoracemate + achiral molecule	KRYPTORACEMIC	NO	P21	4	TRUE	FALSE	8.75	2	1	2	['C']	2	0	1	1	0	[[(1, 'S'), (1, 'R')]]	[2]	[2]	['racemic']	['C1']	3	2.0	4.0	RAC-1	contains following chiral atom(s)C	NA	12.3214	8.4434	20.5045	90.0	99.133	90.0	2106.13235906	1.26621823583	C23 H23 N3 O1,0.5(C4 H8 O2)	N-benzyl-1-methyl-6,11-dihydro-3H-indolizino[8,7-b]indole-11b(5H)-carboxamide ethyl acetate solvate	170 K	None	None	colorless	None	None	None	None	S.Yorimoto, A.Tsubouchi, H.Mizoguchi, H.Oikawa, Y.Tsunekawa, T.Ichino, S.Maeda, H.Oguri
PODGUN	RACEMIC	NC_ND_NI	Strict definition of kryptoracemate	KRYPTORACEMIC	NO	P21	4	TRUE	FALSE	6.65	2	1	4	['C']	4	4	2	2	0	[[(1, 'SS'), (1, 'RR')]]	[2]	[2]	['racemic']	['C1']	2	2.0	4.0	RAC-1	contains following chiral atom(s)C	NA	5.4085	31.686	10.3191	90.0	102.309	90.0	1727.7703435	1.29303039833	C14 H20 N6 O4	disopropyl 2,3-bis(1H-1,2,3-triazol-1-yl)butanedioate	100.2 K	None	None	colorless	None	None	None	None	A.L.Rheingold
POLHEG	RACEMIC	NC_ND_NI	Strict definition of kryptoracemate	KRYPTORACEMIC	NO	P21	4	TRUE	FALSE	4.81	2	1	2	['C']	2	2	1	1	0	[[(1, 'S'), (1, 'R')]]	[2]	[2]	['racemic']	['C1']	2	2.0	4.0	RAC-1	contains following chiral atom(s)C	NA	8.3462	15.3821	16.6385	90.0	93.388	90.0	2132.35189641	1.26613062457	C25 H26 O5	methyl 2-[2'-(benzyloxy)-6'-(methoxymethoxy)[1,1'-biphenyl]-2-yl]propanoate	100 K	None	None	colorless	None	None	None	None	zhang yu
POPQUH	RACEMIC	NC_ND_NI	Strict definition of kryptoracemate	KRYPTORACEMIC	NO	P21	4	TRUE	FALSE	4.28	2	1	4	['C']	4	4	2	2	0	[[(1, 'SS'), (1, 'RR')]]	[2]	[2]	['racemic']	['C1']	2	2.0	4.0	RAC-1	contains following chiral atom(s)C	NA	9.291	23.68	11.16	90.0	106.733	90.0	2351.35532407	1.492625986	C25 H23 Br1 N1 O3 P1 S1	(E)-Ethyl 3-(5-bromo-3-((diphenylphosphorothioyl)amino)-cis-2,3-dihydro-1-benzofuran-2-yl)acrylate	at 113 K	None	183-184deg.C	colorless	None	None	None	None	Xiangtai Meng, You Huang, Ruyu Chen
POXSIG	RACEMIC	NC_ND_NI	Strict definition of kryptoracemate	KRYPTORACEMIC	NO	P21	4	TRUE	FALSE	5.56	2	1	2	['C']	2	2	1	1	0	[[(1, 'S'), (1, 'R')]]	[2]	[2]	['racemic']	['C1']	2	2.0	4.0	RAC-1	contains following chiral atom(s)C	NA	11.7835	11.5305	13.3166	90.0	102.697	90.0	1765.07668135	1.50046571864	C15 H18 Cl3 N1 O3 S1	2,2,2-trichloroethyl 7-phenyl-5-azaspiro[3.4]octane-5-sulfonate	193 K	None	None	colorless	None	None	None	None	E.Martinand-Lurin, R.Gruber, P.Retailleau, P.Fleurat-Lessard, P.Dauban
PTHAZO10	RACEMIC	NC_ND_NI	Strict definition of kryptoracemate	KRYPTORACEMIC	NO	P1	1	TRUE	FALSE	4.0	2	1	2	['C']	2	2	1	1	0	[[(1, 'S'), (1, 'R')]]	[2]	[2]	['racemic']	['C1']	2	2.0	2.0	RAC-1	contains following chiral atom(s)C	NA	5.933	12.367	9.07	95.43	79.27	91.72	650.874472205	1.36916570812	C15 H12 N2 O1 S1	2-Phenylamino-5-phenyl-thiazolin-4-one	None	None	None	None	None	None	None	None	R.Bally, J.-P.Mornon
QAHSUQ	RACEMIC	NC_ND_NI	Strict definition of kryptoracemate + achiral molecule	KRYPTORACEMIC	NO	P21	4	TRUE	FALSE	5.2	4	1	4	['C']	4	4	2	2	0	[[(2, 'S'), (2, 'R')]]	[2]	[4]	['racemic']	['C1']	6	4.0	8.0	RAC-2	contains following chiral atom(s)C	NA	11.2988	17.3862	19.0157	90.0	90.469	90.0	3735.37974673	1.2248289667	C20 H21 N3 O2,0.5(H2 O1)	1,6-Dibenzyltetrahydropyrazolo[1,5-c]pyrimidine-2,7(1H,3H)-dione hemihydrate	293 K	None	None	colorless	None	None	None	None	U.Groselj, A.Podlogar, A.Novak, G.Dahmann, A.Golobic, B.Stanovnik, J.Svete
QAHYOO	RACEMIC	NC_ND_I	Contains also at least an other enantiomer in enantiopure proportion	KRYPTORACEMIC	NO	P1	1	TRUE	FALSE	5.1	4	2	6	['C']	6	6	3	3	0	[[(1, 'S'), (1, 'R')], [(2, 'SR')]]	[2, 1]	[2, 2]	['racemic', 'chiral']	['C1']	4	2.0	2.0	Wa-could be Diast	contains following chiral atom(s)C	NA	11.206	13.618	5.869	97.73	99.51	75.43	850.851130103	1.22323646674	C9 H12 N1 O1 1+,C10 H11 O2 1-	(1S,2R)-1-Ammonioindan-2-ol (R)-3-phenylbutyrate	at 296.1 K	None	None	None	None	None	None	None	Y.Kobayashi, T.Kurasawa, K.Kinbara, K.Saigo
QAMYEJ	RACEMIC	NC_ND_I	Contains also at least an other enantiomer in enantiopure proportion	KRYPTORACEMIC	NO	P21	4	TRUE	FALSE	4.73	4	2	6	['C']	6	6	2	4	0	[[(2, 'S')], [(1, 'SS'), (1, 'RR')]]	[1, 2]	[2, 2]	['chiral', 'racemic']	['C3', 'C1']	4	2.0	4.0	RAC-1	contains following chiral atom(s)C	NA	7.3025	22.8901	8.1193	90.0	96.599	90.0	1348.18959238	1.33645109941	C8 H12 N1 1+,C4 H5 O6 1-	(S)-1-Phenylethylammonium rac-hydrogen tartrate	at 150.0 K	None	None	colorless	None	None	methanol	None	D.E.Turkington, E.J.MacLean, A.J.Lough, G.Ferguson, C.Glidewell
QAMYIN	RACEMIC	NC_ND_I	Contains also at least an other enantiomer in enantiopure proportion	KRYPTORACEMIC	NO	P21	4	TRUE	FALSE	3.95	4	2	6	['C']	6	6	4	2	0	[[(2, 'R')], [(1, 'SS'), (1, 'RR')]]	[1, 2]	[2, 2]	['chiral', 'racemic']	['C3', 'C1']	4	2.0	4.0	RAC-1	contains following chiral atom(s)C	NA	7.2952	22.8935	8.11	90.0	96.603	90.0	1345.48812119	1.33913442607	C8 H12 N1 1+,C4 H5 O6 1-	(R)-1-Phenylethylammonium (R,R)-hydrogen tartrate	at 150.0 K	None	None	colorless	None	None	methanol	None	D.E.Turkington, E.J.MacLean, A.J.Lough, G.Ferguson, C.Glidewell
QAMYUZ	RACEMIC	NC_ND_I	Contains also at least an other enantiomer in enantiopure proportion	KRYPTORACEMIC	NO	P21	4	TRUE	FALSE	5.35	6	2	8	['C']	8	8	6	2	0	[[(2, 'S'), (2, 'R')], [(2, 'RR')]]	[2, 1]	[4, 2]	['racemic', 'chiral']	['C2', 'C1']	6	2.0	4.0	Wa-could be Diast	contains following chiral atom(s)C	NA	8.3381	22.738	10.819	90.0	90.12	90.0	2051.18829611	1.27081481748	2(C8 H12 N1 1+),C4 H4 O6 2-	bis(rac-1-Phenylethylammonium) (R,R)-tartrate	at 150.0 K	None	None	colorless	None	None	methanol	None	D.E.Turkington, E.J.MacLean, A.J.Lough, G.Ferguson, C.Glidewell
QAMZAG	RACEMIC	NC_ND_I	Contains also at least an other enantiomer in enantiopure proportion + achiral molecule	KRYPTORACEMIC	NO	P1	1	TRUE	FALSE	5.07	12	2	16	['C']	16	16	12	4	0	[[(8, 'R')], [(2, 'SS'), (2, 'RR')]]	[1, 2]	[8, 4]	['chiral', 'racemic']	['C1']	14	4.0	4.0	RAC-2	contains following chiral atom(s)C	NA	9.0822	15.7819	15.904	108.746	96.858	90.06	2141.33363654	1.26701108187	2(C8 H12 N1 1+),C4 H4 O6 2-,0.5(C1 H4 O1)	bis((R)-1-Phenylethylammonium) rac-tartrate methanol solvate	at 150.0 K	None	None	colorless	None	None	None	None	D.E.Turkington, E.J.MacLean, A.J.Lough, G.Ferguson, C.Glidewell
QAQPED	SCALEMIC	NC_ND_NI	Unbalanced Kryptoracemate	KRYPTORACEMIC	NO	P212121	19	TRUE	FALSE	4.55	3	1	9	['C']	9	6	5	4	0	[[(1, 'SRS'), (2, 'RSR')]]	[2]	[3]	['scalemic']	['C1']	3	3.0	12.0	scal-3-attention could contain stereoisomer	contains following chiral atom(s)C	NA	10.4849	11.1144	39.672	90.0	90.0	90.0	4623.1119562	1.05753518937	C13 H27 N1 O3	2-diisopropylcarbamoyl-3-methylpentane-3,4-diol	at 133 K	None	None	colorless	None	None	None	None	E.Vedejs, A.W.Kruger
QASWUD	RACEMIC	NC_ND_NI	Strict definition of kryptoracemate	KRYPTORACEMIC	NO	P1	1	TRUE	FALSE	10.32	2	1	8	['C']	8	8	4	4	0	[[(1, 'RSSR'), (1, 'SRRS')]]	[2]	[2]	['racemic']	['C1']	2	2.0	2.0	RAC-1	contains following chiral atom(s)C	NA	8.338	12.874	16.869	91.86	97.51	107.21	1710.02083435	1.2639183146	C37 H38 N2 O7 Si1	(+-)-(1R,4R,4aS,9aS)-2-(4-(2-Nitrophenyl)-9,10-dioxo-2-(tri-isopropylsiloxy)-1,4,4a,9,9a,10-hexahydro-1-anthryl)isoindole-1,3-dione	at 293 K	None	None	colorless	None	None	None	None	E.Caballero, D.Alonso, R.Pelaez, C.Alvarez, P.Puebla, F.Sanz, M.Medarde, F.Tome
QAVBIB	RACEMIC	NC_ND_NI	Strict definition of kryptoracemate + achiral molecule	KRYPTORACEMIC	NO	P21	4	TRUE	FALSE	7.11	2	1	2	['C']	2	2	1	1	0	[[(1, 'S'), (1, 'R')]]	[2]	[2]	['racemic']	['C1']	4	2.0	4.0	RAC-1	contains following chiral atom(s)C	NA	11.105	11.107	20.673	90.0	98.37	90.0	2522.71518172	1.24945772567	C29 H22 N2 O1,C2 H4 O2	1-(5-(9-anthryl)-3-(2-naphthyl)-4,5-dihydro-1H-pyrazol-1-yl)ethanone acetic acid solvate	293 K	None	None	colorless	None	None	None	None	R.Usman, Arshad Khan, Mingliang Wang
QEFJUJ	RACEMIC	NC_ND_NI	Strict definition of kryptoracemate	KRYPTORACEMIC	NO	P212121	19	TRUE	FALSE	2.58	2	1	4	['C']	4	0	2	2	0	[[(1, 'SS'), (1, 'RR')]]	[2]	[2]	['racemic']	['C1']	2	2.0	8.0	RAC-1	contains following chiral atom(s)C	NA	8.9713	12.6161	31.4987	90.0	90.0	90.0	3565.11162713	1.20543008704	C17 H29 N1 O3 Si1	(3aR,6aR)-6-(triisopropylsilyl)-2,3-dihydro-4H-3a,6a-(epoxymethanoimino)cyclopenta[b]furan-8-one	123 K	None	None	colorless	None	None	None	None	Jiun-Le Shih, S.Jansone-Popova, C.Huynh, J.A.May
QELQOQ	RACEMIC	NC_ND_NI	Strict definition of kryptoracemate	KRYPTORACEMIC	NO	P21	4	TRUE	FALSE	4.45	2	1	2	['C']	2	0	1	1	0	[[(1, 'S'), (1, 'R')]]	[2]	[2]	['racemic']	['C1']	2	2.0	4.0	RAC-1	contains following chiral atom(s)C	NA	14.536	10.3088	18.813	90.0	111.418	90.0	2624.41980837	1.2744749854	C32 H26 F1 N3 O2	2-benzyl-4-(benzylamino)-3-(4-fluorophenyl)-3-hydroxy-8-methyl-2,3-dihydro-1H-pyrrolo[3,4-c]quinolin-1-one	296.1 K	None	None	colorless	None	None	None	None	Bao-Qu Wang, Cong-Hai Zhang, Xiao-Xue Tian, Jun Lin, Sheng-Jiao Yan
QERFAX	RACEMIC	NC_ND_NI	Strict definition of kryptoracemate	KRYPTORACEMIC	NO	P21	4	TRUE	FALSE	6.19	2	1	2	['C']	2	2	1	1	0	[[(1, 'S'), (1, 'R')]]	[2]	[2]	['racemic']	['C1']	2	2.0	4.0	RAC-1	contains following chiral atom(s)C	NA	5.8841	34.0526	9.6709	90.0	98.1	90.0	1918.41599679	1.20298310583	C26 H21 N1	5-(4-methylphenyl)-6-phenyl-5,6-dihydrocyclohepta[b]indole	293.1 K	None	None	None	None	None	None	None	Zhen Wang, Y.Addepalli, Yun He
QESVOC	RACEMIC	NC_ND_NI	Strict definition of kryptoracemate	KRYPTORACEMIC	NO	P212121	19	TRUE	FALSE	3.21	2	1	4	['C']	4	4	2	2	0	[[(1, 'SS'), (1, 'RR')]]	[2]	[2]	['racemic']	['C1']	2	2.0	8.0	RAC-1	contains following chiral atom(s)C	NA	11.205	12.71	27.642	90.0	90.0	90.0	3936.6506331	1.26029649016	C19 H23 N1 O5 Si1	7-(2-nitrophenyl)-9-[(trimethylsilyl)ethynyl]oxonane-2,6-dione	150 K	None	None	colorless	None	None	None	None	D.R.Loya, A.Jean, M.Cormier, C.Fressigne, S.Nejrotti, J.Blanchet, J.Maddaluno, Michael De Paolis
QETXAO	RACEMIC	NC_ND_NI	Strict definition of kryptoracemate	KRYPTORACEMIC	NO	P212121	19	TRUE	FALSE	5.91	2	1	2	['C']	2	0	1	1	0	[[(1, 'S'), (1, 'R')]]	[2]	[2]	['racemic']	['C1']	2	2.0	8.0	RAC-1	contains following chiral atom(s)C	NA	5.713	16.058	27.966	90.0	90.0	90.0	2565.58277396	1.2131551761	C16 H14 N2	2-Methyl-2,4-diphenyl-2H-imidazole	None	None	89-91deg.C	colorless	None	None	n-hexane	None	S.Auricchio, S.Grassi, L.Malpezzi, A.S.Sartori, A.M.Truscello
QEWTES	RACEMIC	NC_ND_NI	Strict definition of kryptoracemate	KRYPTORACEMIC	NO	P212121	19	TRUE	FALSE	2.61	2	1	10	['C']	10	8	5	5	0	[[(1, 'SSSRR'), (1, 'RRRSS')]]	[2]	[2]	['racemic']	['C1']	2	2.0	8.0	RAC-1	contains following chiral atom(s)C	NA	6.2966	12.3168	26.7947	90.0	90.0	90.0	2078.03516918	1.94351980567	C11 H12 Br2	rac-(1R,2S,6R,7R,10R)-1,10-dibromotricyclo(5.2.2.02,6)undeca-4,8-diene	at 100 K	None	51-52 deg.C	None	None	None	None	None	Kuan-Jen Su, J.-L.Mieusset, V.B.Arion, L.Brecker, U.H.Brinker
QIJMAX	RACEMIC	NC_ND_NI	Strict definition of kryptoracemate	KRYPTORACEMIC	NO	P21	4	TRUE	FALSE	4.32	2	1	6	['C']	6	6	3	3	0	[[(1, 'RRS'), (1, 'SSR')]]	[2]	[2]	['racemic']	['C1']	2	2.0	4.0	RAC-1	contains following chiral atom(s)C	NA	12.398	9.766	16.128	90.0	95.65	90.0	1943.27320932	1.32592679257	C21 H22 Cl1 N1 O2 S1	2-(4-Chlorobenzyl)-6-phenyl-3,4,4a,5,6,8a-hexahydro-2H-benzo(e)(1,2)thiazine 1,1-dioxide	at 160 K	None	None	colorless	None	None	None	None	I.R.Greig, M.J.Tozer, P.T.Wright
QILZOD	RACEMIC	NC_ND_NI	Contains also at least an other enantiomer in enantiopure proportion	KRYPTORACEMIC	NO	P21	4	TRUE	FALSE	4.74	4	2	4	['C']	4	4	1	3	0	[[(1, 'S'), (1, 'R')], [(2, 'S')]]	[2, 1]	[2, 2]	['racemic', 'chiral']	['C1']	4	2.0	4.0	Wa-could be Diast	contains following chiral atom(s)C	NA	8.84337	5.8351	33.6766	90.0	91.9839	90.0	1736.73653746	1.32094027907	C14 H14 O3,C5 H9 N1 O2	bis((2S)-2-(6-methoxynaphthalen-2-yl)propanoic acid) (2R)-pyrrolidin-1-ium-2-carboxylate (2S)-pyrrolidin-1-ium-2-carboxylate	295 K	None	None	colorless	None	None	None	None	N.Tumanova, N.Tumanov, F.Fischer, F.Morelle, V.Ban, K.Robeyns, Y.Filinchuk, J.Wouters, Franziska Emmerling, T.Leyssens
QIMBAS	RACEMIC	NC_ND_NI	Contains also at least an other enantiomer in enantiopure proportion	KRYPTORACEMIC	NO	P21	4	TRUE	FALSE	6.4	4	2	4	['C']	4	4	3	1	0	[[(2, 'R')], [(1, 'S'), (1, 'R')]]	[1, 2]	[2, 2]	['chiral', 'racemic']	['C1']	4	2.0	4.0	RAC-1	contains following chiral atom(s)C	NA	12.1578	5.8278	25.6828	90.0	98.762	90.0	1798.47257062	1.2755964611	C14 H14 O3,C5 H9 N1 O2	(2R)-2-(6-methoxynaphthalen-2-yl)propanoic acid (2S)-2-(6-methoxynaphthalen-2-yl)propanoic acid bis((2R)-pyrrolidin-1-ium-2-carboxylate)	295 K	None	435 K	colorless	polymorph I	None	None	None	N.Tumanova, N.Tumanov, F.Fischer, F.Morelle, V.Ban, K.Robeyns, Y.Filinchuk, J.Wouters, Franziska Emmerling, T.Leyssens
QIYJIR	RACEMIC	NC_ND_NI	Strict definition of kryptoracemate	KRYPTORACEMIC	NO	P21	4	TRUE	FALSE	4.51	2	1	2	['C']	2	2	1	1	0	[[(1, 'S'), (1, 'R')]]	[2]	[2]	['racemic']	['C1']	2	2.0	4.0	RAC-1	contains following chiral atom(s)C	NA	10.123	6.087	21.693	90.0	100.902	90.0	1312.56996774	1.37772759725	C14 H12 N2 O4	2-(2-Hydroxycyclopentylidene)ethanenitrile p-nitrobenzoate	None	None	340-342K	colorless	None	None	ethyl acetate	None	F.F.Fleming, Qunzhao Wang, O.W.Steward
QOMSUH	RACEMIC	NC_ND_NI	Strict definition of kryptoracemate	KRYPTORACEMIC	NO	P21	4	TRUE	FALSE	13.71	4	1	8	['C']	8	4	6	2	0	[[(1, 'SS'), (3, 'RR')]]	[2]	[4]	['racemic']	['C1']	4	4.0	8.0	RAC-2	contains following chiral atom(s)C	NA	10.4049	15.9773	22.8584	90.0	100.679	90.0	3734.21733716	1.32492890165	C19 H20 N2 O4 S1	(R,R)-(+)-2-t-butyl-4-(2-nitro-1-(thiophen-2-yl)ethyl)-4-phenyloxazol-5(4H)-one	at 100 K	None	110-112 deg.C	colorless	None	None	None	None	J.Aleman, A.Milelli, S.Cabrera, E.Reyes, K.A.Jorgensen
QOQRUK	RACEMIC	NC_ND_NI	Strict definition of kryptoracemate + achiral molecule	KRYPTORACEMIC	NO	P21	4	TRUE	FALSE	7.3	4	1	4	['N']	0	4	2	2	0	[[(2, 'S'), (2, 'R')]]	[2]	[4]	['racemic']	['C1']	11	4.0	8.0	RAC-2	contains following chiral atom(s)N	NA	9.0999	19.1473	15.0649	90.0	90.383	90.0	2624.82716368	1.4108749568	C13 H13 N1 O4,1.75(H2 O1)	N-(4H-Chromon-3-ylmethyl)-N-methylglycine hydrate	at 150 K	None	196-198 deg.C	black	None	None	methanol	None	S.K.Panja, S.Maiti, M.G.B.Drew, C.Bandyopadhyay
QOTNIY	RACEMIC	NC_ND_NI	Strict definition of kryptoracemate	KRYPTORACEMIC	NO	P1	1	TRUE	FALSE	7.88	2	1	2	['C']	2	2	1	1	0	[[(1, 'S'), (1, 'R')]]	[2]	[2]	['racemic']	['C1']	2	2.0	2.0	RAC-1	contains following chiral atom(s)C	NA	6.0244	11.844	13.27	93.58	94.51	94.85	938.264837107	1.3182534596	C25 H21 F1 O2	12-(4-fluorophenyl)-9,9-dimethyl-8,9,10,12-tetrahydro-11H-benzo[a]xanthen-11-one	at 150 K	None	None	None	None	None	None	None	D.L.da Silva, B.S.Terra, M.R.Lage, A.L.T.G.Ruiz, C.C.da Silva, J.E.de Carvalho, J.W.de M.Carneiro, F.T.Martins, S.A.Fernades, Angelo de Fatima
QOVREZ01	RACEMIC	NC_ND_NI	Strict definition of kryptoracemate	KRYPTORACEMIC	NO	P21	4	TRUE	FALSE	4.81	2	1	14	['C']	14	14	7	7	0	[[(1, 'SSRRRSR'), (1, 'RRSSSRS')]]	[2]	[2]	['racemic']	['C1']	2	2.0	4.0	RAC-1	contains following chiral atom(s)C	NA	13.813	19.279	5.9801	90.0	96.665	90.0	1581.74299978	1.46261801057	C17 H16 O8	6-O-Acryloyl-2-O-benzoyl-myo-inositol 1,3,5-orthoformate	at 133 K	None	410-412 K	colorless	polymorph II	None	ethyl acetate/light petroleum ether	None	S.Krishnaswamy, R.G.Gonnade, M.M.Bhadbhade, M.S.Shashidhar
QOZQUS	RACEMIC	NC_ND_NI	Strict definition of kryptoracemate	KRYPTORACEMIC	NO	P21	4	TRUE	FALSE	5.18	2	1	2	['C']	2	2	1	1	0	[[(1, 'S'), (1, 'R')]]	[2]	[2]	['racemic']	['C1']	2	2.0	4.0	RAC-1	contains following chiral atom(s)C	NA	10.045	28.599	10.9	90.0	115.904	90.0	2816.70669855	1.18196048282	C29 H37 B2 N1 O5	2-(2-(4,4,5,5-Tetramethyl-1,3,2-dioxaborolan-2-yl)phenyl)-1-(3-(4,4,5,5-tetramethyl-1,3,2-dioxaborolan-2-yl)phenyl)-2,3-dihydro-4(1H)-pyridinone	at 198 K	None	76-78 deg.C	colorless	None	None	THF	None	F.E.Appoh, S.L.Wheaton, C.M.Vogels, F.J.Baerlocher, A.Decken, S.A.Westcott
QUDJUW	RACEMIC	NC_ND_NI	Strict definition of kryptoracemate	KRYPTORACEMIC	NO	C2	5	TRUE	FALSE	10.19	2	1	2	['C']	2	2	1	1	0	[[(1, 'S'), (1, 'R')]]	[2]	[2]	['racemic']	['C1']	2	2.0	8.0	RAC-1	contains following chiral atom(s)C	NA	22.321	8.1823	21.625	90.0	98.721	90.0	3903.86474668	1.35698311343	C17 H20 Cl1 N2 O5 P1	diethyl (((4-chlorophenyl)amino)(4-nitrophenyl)methyl)phosphonate	296 K	None	None	None	None	None	None	None	Qing-Ming Wang, Yang Li, Hong-Miao Yao, Hui Qi, Xin-Hui Tang
QUGPIR	RACEMIC	NC_ND_NI	Strict definition of kryptoracemate	KRYPTORACEMIC	NO	P21	4	TRUE	FALSE	6.87	2	1	6	['C']	6	4	3	3	0	[[(1, 'SRS'), (1, 'RSR')]]	[2]	[2]	['racemic']	['C1']	2	2.0	4.0	RAC-1	contains following chiral atom(s)C	NA	9.54	10.678	12.705	90.0	92.68	90.0	1292.81890518	1.30135369748	C13 H19 N1 O4	spiro[(5R*,8aS*)-hexahydro[1,3]oxazolo[3,4-a]pyridine-3-one-5:1'-((3'S)-formyloxycyclohexane)]	at 22 deg.C	None	93-94deg.C	colorless	None	None	ethyl acetate/cyclohexane	The a cell value is 9.540 as in the supplementary data, not 8.540 as published	M.David, H.Dhimane, C.Vanucci-Bacque, G.Lhommet
QUKJEL	RACEMIC	NC_ND_NI	Strict definition of kryptoracemate	KRYPTORACEMIC	NO	P212121	19	TRUE	FALSE	5.35	2	1	4	['C']	4	2	2	2	0	[[(1, 'SS'), (1, 'RR')]]	[2]	[2]	['racemic']	['C1']	2	2.0	8.0	RAC-1	contains following chiral atom(s)C	NA	10.501	18.6	20.024	90.0	90.0	90.0	3911.0596464	1.09491850559	C19 H18 N2 O3	7a-Hydroxy-7-isopropyl-7,7a-dihydro-6H-6,12a-diaza-dibenzo[a,e]azulene-5,12-dione	at 293 K	None	None	None	None	None	acetone	None	A.G.Griesbeck, W.Kramer, J.Lex
QURYEH	RACEMIC	NC_ND_NI	Strict definition of kryptoracemate	KRYPTORACEMIC	NO	P21	4	TRUE	FALSE	8.9	2	1	4	['C' 'P']	2	2	2	2	0	[[(1, 'SR'), (1, 'RS')]]	[2]	[2]	['racemic']	['C1']	2	2.0	4.0	RAC-1	contains following chiral atom(s)C,P	NA	7.313	15.94	9.421	90.0	97.49	90.0	1088.82838178	1.7210535024	C7 H12 N2 O6 P2	N-(5-methyl-2-pyridyl)aminomethane-1,1-diphosphonic acid	at 100 K	None	None	white	None	None	water	None	E.Matczak-Jon, W.Sawka-Dobrowolska, P.Kafarski, V.Videnova-Adrabinska
QUTWAE	RACEMIC	NC_ND_NI	Strict definition of kryptoracemate	KRYPTORACEMIC	NO	P1	1	TRUE	FALSE	4.87	2	1	2	['C']	2	2	1	1	0	[[(1, 'S'), (1, 'R')]]	[2]	[2]	['racemic']	['C1']	2	2.0	2.0	RAC-1	contains following chiral atom(s)C	NA	5.7855	9.3534	16.804	88.17	82.4	84.589	897.154217216	1.24903242309	C24 H19 N1 O1	1-Methyl-3-(3-phenyl-1H-isochromen-1-yl)-1H-indole	at 293 K	None	None	colorless	None	None	None	None	Ri-Yuan Tang, Jin-Heng Li
RAKXEH	RACEMIC	NC_D_I	Contains also at least an other enantiomer in enantiopure proportion	KRYPTORACEMIC	NO	P1	1	TRUE	TRUE	4.15	4	2	16	['C' 'N']	14	14	5	11	0	[[(1, 'S'), (1, 'R')], [(2, 'SRSSSSR')]]	[2, 1]	[2, 2]	['racemic', 'chiral']	['C1']	4	2.0	2.0	Wa-could be Diast	contains following chiral atom(s)C,N	NA	9.484	12.889	15.83	112.87	95.05	101.42	1718.2290318	1.38336156083	C23 H27 N2 O4 1+,C13 H13 F3 N1 O5 1-	9,10-Dimethoxy-3,4a,5,12,13,14a,15,15a,15b,15c-decahydro-6H-1,14-methanoindolo(3,2,1-j)oxepino(2,3,4-de)pyrrolo(2,3-h)quinolin-6-one 3-(3,4-dimethoxyphenyl)-3-((trifluoroacetyl)amino)propanoic acid	at 295 K	None	None	colorless	None	None	None	None	F.von Nussbaum, W.Steglich, K.Polborn
RALLEW	RACEMIC	NC_ND_NI	Strict definition of kryptoracemate	KRYPTORACEMIC	NO	P21	4	TRUE	FALSE	4.5	4	1	20	['C']	20	20	10	10	0	[[(2, 'RRSSS'), (2, 'SSRRR')]]	[2]	[4]	['racemic']	['C1']	4	4.0	8.0	RAC-2	contains following chiral atom(s)C	NA	10.0036	27.0011	12.1811	90.0	95.159	90.0	3276.88637865	1.22576634794	C18 H22 O4	2-Hydroxy-3,6,11-trimethyl-1,2,4a,13a-tetrahydro-5,12-dioxadibenzo(a,e)cyclononan-13-one	at 296 K	None	None	colorless	None	None	None	None	L.Lemiegre, R.L.Stevens, J.-C.Combret, J.Maddaluno
RAMSED	RACEMIC	NC_ND_NI	Strict definition of kryptoracemate	KRYPTORACEMIC	NO	P1	1	TRUE	FALSE	4.18	2	1	4	['C']	4	2	2	2	0	[[(1, 'SR'), (1, 'RS')]]	[2]	[2]	['racemic']	['C1']	2	2.0	2.0	RAC-1	contains following chiral atom(s)C	NA	8.372	10.92	11.88	74.4	84.39	78.56	1024.16894593	1.46027747766	C23 H20 Br1 N3 O2	rac-syn-7-Bromo-1,3-dihydro-2H-1-methyl-5-(2'-pyridyl)-3-(1'-hydroxy-1'-phenylethyl)-1,4-benzodiazepin-2-one	at 293 K	None	201-203 deg.C.(dec.)	colorless	None	None	ethanol/dichloromethane/tetrahydrofuran	None	M.Majeric-Elenkov, D.Ziher, A.Visnjevac, Z.Hamersak, B.Kojic-Prodic, V.Sunjic
RAQDOF	RACEMIC	NC_ND_NI	Strict definition of kryptoracemate	KRYPTORACEMIC	NO	P21	4	TRUE	FALSE	6.12	2	1	2	['C']	2	2	1	1	0	[[(1, 'S'), (1, 'R')]]	[2]	[2]	['racemic']	['C1']	2	2.0	4.0	RAC-1	contains following chiral atom(s)C	NA	9.1176	16.071	19.36	90.0	98.211	90.0	2807.71994009	1.64011446276	C30 H23 B1 F15 N1	tris(pentafluorophenyl)(1-(2,2,6,6-tetramethylpiperidinium-1-ylidene)propan-2-yl)borate	100 K	None	None	colorless	None	None	None	None	Tongdao Wang, Long Wang, C.G.Daniliuc, K.Samigullin, M.Wagner, G.Kehr, G.Erker
RARMEE	RACEMIC	NC_ND_NI	Strict definition of kryptoracemate + achiral molecule	KRYPTORACEMIC	NO	P21	4	TRUE	FALSE	2.9	2	1	2	['C']	2	0	1	1	0	[[(1, 'S'), (1, 'R')]]	[2]	[2]	['racemic']	['C1']	3	2.0	4.0	RAC-1	contains following chiral atom(s)C	NA	14.1862	5.6007	25.5496	90.0	96.517	90.0	2016.86613663	1.51256845274	C20 H15 Br1 O5,0.5(C4 H8 O2)	Methyl 3-(2-(4-bromophenyl)-2-oxoethyl)-2-oxo-5-phenyl-2,3-dihydrofuran-3-carboxylate ethyl acetate solvate	at 173 K	None	126-127 deg.C	colorless	None	None	None	None	Jie Chen, Shengjun Ni, Shengming Ma
RASTAG	RACEMIC	NC_ND_I	Contains also at least an other enantiomer in enantiopure proportion	KRYPTORACEMIC	NO	P21	4	TRUE	FALSE	4.15	4	2	10	['C' 'N']	8	10	7	3	0	[[(1, 'RRS'), (1, 'SSR')], [(2, 'RR')]]	[2, 1]	[2, 2]	['racemic', 'chiral']	['C3', 'C1']	4	2.0	4.0	Wa-could be Diast	contains following chiral atom(s)C,N	NA	8.7641	26.785	12.5316	90.0	104.412	90.0	2849.17450342	1.43612567665	C23 H30 Cl1 F1 N3 O4 1+,C4 H5 O6 1-	cis-4-Amino-5-chloro-N-(1-(3-(4-fluorophenoxy)propyl)-3-methoxy-piperidinium-4-yl)-2-methoxybenzamide tartrate	None	None	None	colorless	None	None	None	The asymmetric unit contains the two diastereomers ((3R,4S)(2R,3R)) and ((3S,4R)(2R,3R))as a double salt in a 1:1 ratio	O.M.Peeters, N.M.Blaton, C.J.De Ranter
RAVBUO	RACEMIC	NC_ND_NI	Strict definition of kryptoracemate	KRYPTORACEMIC	NO	P21	4	TRUE	FALSE	3.41	2	1	2	['C']	2	2	1	1	0	[[(1, 'S'), (1, 'R')]]	[2]	[2]	['racemic']	['C1']	2	2.0	4.0	RAC-1	contains following chiral atom(s)C	NA	10.5109	16.5321	13.653	90.0	99.745	90.0	2338.21187027	1.74736703893	C23 H11 B1 F15 O2	(1-ethoxypropoxy)[tris(pentafluorophenyl)]-borane	100 K	None	None	colorless	None	None	None	None	Guo-Qiang Chen, G.Kehr, C.G.Daniliuc, M.Bursch, S.Grimme, G.Erker
RAXTOC	RACEMIC	NC_ND_NI	Strict definition of kryptoracemate + achiral molecule	KRYPTORACEMIC	NO	P212121	19	TRUE	FALSE	9.19	2	1	10	['C']	10	8	5	5	0	[[(1, 'SSRSR'), (1, 'RRSRS')]]	[2]	[2]	['racemic']	['C1']	4	2.0	8.0	RAC-1	contains following chiral atom(s)C	NA	10.4008	21.787	29.594	90.0	90.0	90.0	6706.06638278	1.36639837754	C30 H33 N3 O9 S1,C6 H6	methyl (3aS,4R,5S,6aS,12aR)-7-acetyl-3-((4-methoxyphenyl)sulfonyl)-4-(2-oxooxazolidine-3-carbonyl)-1,2,3,3a,4,5,6,6a,7,12-decahydropyrrolo[2,3-k]acridine-5-carboxylate benzene solvate	93 K	None	None	colorless	None	None	benzene	None	S.Harada, S.Nakashima, W.Yamada, T.Morikawa, A.Nishida
RENRIO	RACEMIC	NC_ND_NI	Strict definition of kryptoracemate	KRYPTORACEMIC	NO	P21	4	TRUE	FALSE	4.43	2	1	4	['C']	4	2	2	2	0	[[(1, 'SS'), (1, 'RR')]]	[2]	[2]	['racemic']	['C1']	2	2.0	4.0	RAC-1	contains following chiral atom(s)C	NA	9.6816	18.2436	12.6856	90.0	106.083	90.0	2152.92764387	1.13645104606	C24 H37 B1 O2	2-(2-benzyl-1-cyclohexylcyclopentyl)-4,4,5,5-tetramethyl-1,3,2-dioxaborolane	100 K	None	None	colorless	None	None	None	None	Xun Liu, T.Maxwell Deaton, F.Haeffner, J.P.Morken
RETYUM	RACEMIC	NC_ND_NI	Strict definition of kryptoracemate	KRYPTORACEMIC	NO	P21	4	TRUE	FALSE	3.25	2	1	2	['C']	2	2	1	1	0	[[(1, 'S'), (1, 'R')]]	[2]	[2]	['racemic']	['C1']	2	2.0	4.0	RAC-1	contains following chiral atom(s)C	NA	12.16	14.7008	15.9816	90.0	110.484	90.0	2676.25659885	1.2522825513	C30 H32 O7	Dimethyl ((4,5,6-trimethoxy-3,3-diphenyl-2,3-dihydro-1H-inden-1-yl)methyl)malonate	at 295 K	None	159-160 deg.C	colorless	None	None	None	None	Y.A.Volkova, E.M.Budynina, A.E.Kaplun, O.A.Ivanova, A.O.Chagarovskiy, D.A.Skvortsov, V.B.Rybakov, I.V.Trushkov, M.Ya Melnikov
REVSOC	RACEMIC	NC_ND_NI	Strict definition of kryptoracemate	KRYPTORACEMIC	NO	P1	1	TRUE	FALSE	6.59	2	1	2	['C']	2	0	1	1	0	[[(1, 'S'), (1, 'R')]]	[2]	[2]	['racemic']	['C1']	2	2.0	2.0	RAC-1	contains following chiral atom(s)C	NA	8.1178	10.3361	10.4462	95.777	98.145	92.874	861.407220604	1.22760590244	C21 H22 N2 O1	3-(1,2-Dibenzyl-5-oxopyrrolidin-2-yl)propanenitrile	at 273 K	None	164-165 deg.C	None	None	None	None	None	Xiao Zheng, Xi-Jie Dai, Hong-Qiu Yuan, Chen-Xi Ye, Jie Ma, Pei-Qiang Huang
REXSIY	RACEMIC	NC_ND_NI	Strict definition of kryptoracemate	KRYPTORACEMIC	NO	P1	1	TRUE	FALSE	5.03	2	1	2	['C']	2	2	1	1	0	[[(1, 'S'), (1, 'R')]]	[2]	[2]	['racemic']	['C1']	2	2.0	2.0	RAC-1	contains following chiral atom(s)C	NA	4.795	12.216	12.754	68.96	82.414	89.743	690.420838701	1.32456820134	C15 H17 N1 O2 S1	2-(Morpholin-4-ylcarbothioyl)-3,4-dihydronaphthalen-1(2H)-one	at 293 K	None	None	None	None	None	None	None	S.Samai, Tanmoy Chanda, H.Ila, Maya Shankar Singh
REZZOM	RACEMIC	NC_ND_NI	Strict definition of kryptoracemate	KRYPTORACEMIC	NO	P21	4	TRUE	FALSE	3.39	2	1	6	['C']	6	4	3	3	0	[[(1, 'RRR'), (1, 'SSS')]]	[2]	[2]	['racemic']	['C1']	2	2.0	4.0	RAC-1	contains following chiral atom(s)C	NA	10.475	22.938	9.1934	90.0	113.49	90.0	2025.89285622	1.26548480393	C21 H23 N1 O4 S1	1-(3-(Benzyloxymethyl)-2-methyl-1-p-tosylaziridin-2-yl)prop-2-yn-1-ol	at 173 K	None	None	None	None	None	None	None	J.M.Schomaker, A.R.Geiser, R.Huang, B.Borhan
RIBDUE	RACEMIC	NC_ND_NI	Strict definition of kryptoracemate	KRYPTORACEMIC	NO	P21	4	TRUE	FALSE	7.52	2	1	10	['C']	10	6	5	5	0	[[(1, 'RSSSS'), (1, 'SRRRR')]]	[2]	[2]	['racemic']	['C1']	2	2.0	4.0	RAC-1	contains following chiral atom(s)C	NA	12.33	6.8843	18.481	90.0	106.24	90.0	1506.13604885	1.76884320422	C15 H15 Br2 N1 O2	4,5-dibromo-6-methyl-2-phenyloctahydro-1H-4,6-epoxycyclopenta[c]pyridin-1-one	100 K	None	None	colorless	None	None	None	None	F.I.Zubkov, D.F.Mertsalov, V.P.Zaytsev, A.V.Varlamov, A.V.Gurbanov, P.V.Dorovatovskii, T.V.Timofeeva, V.N.Khrustalev, K.T.Mahmudov
RIGMAW	RACEMIC	NC_ND_NI	Strict definition of kryptoracemate	KRYPTORACEMIC	NO	P212121	19	TRUE	FALSE	4.64	2	1	2	['C']	2	2	1	1	0	[[(1, 'S'), (1, 'R')]]	[2]	[2]	['racemic']	['C1']	2	2.0	8.0	RAC-1	contains following chiral atom(s)C	NA	11.7604	14.9847	15.1844	90.0	90.0	90.0	2675.88707475	1.39174457028	C13 H16 N2 O3 S1	rac-2-isopropyl-3-(2-nitrobenzyl)-1,3-thiazolidin-4-one	at 120 K	None	None	colorless	None	None	methanol/heptane	None	W.Cunico, C.R.B.Gomes, S.M.S.V.Wardell, J.N.Low, C.Glidewell
RIGQIJ	SCALEMIC	NC_ND_NI	Unbalanced Kryptoracemate	KRYPTORACEMIC	NO	P1	1	TRUE	FALSE	7.18	3	1	3	['C']	3	3	2	1	0	[[(1, 'S'), (2, 'R')]]	[2]	[3]	['scalemic']	['C1']	3	3.0	3.0	scal-3-attention could contain stereoisomer	contains following chiral atom(s)C	NA	5.268	7.674	25.24	86.224	84.914	71.474	962.915412894	1.22253133039	C17 H16 O1	2-Ethyl-3-ethylidene-2,3-dihydro-1H-cyclopenta[a]naphthalen-1-one	at 297 K	None	None	yellow	None	None	None	None	R.Cano, Miguel Yus, D.J.Ramon
RIGSEF	RACEMIC	NC_ND_I	Strict definition of kryptoracemate + achiral molecule	KRYPTORACEMIC	NO	P1	1	TRUE	FALSE	4.12	2	1	6	['C']	6	4	3	3	0	[[(1, 'RRR'), (1, 'SSS')]]	[2]	[2]	['racemic']	['C1']	4	2.0	2.0	RAC-1	contains following chiral atom(s)C	NA	6.872	11.186	11.37	83.48	82.12	88.28	860.068908018	1.75757957543	C10 H17 I1 N1 O4 1+,C2 F3 O2 1-	Methyl 3-acetoxy-1-ammonio-4-iodocyclohexane 1-carboxylate trifluoroacetate	None	None	122-124deg.C	colorless	None	None	None	None	A.Avenoza, C.Cativiela, M.A.Fernandez-Recio, J.M.Peregrina
RILNIM	RACEMIC	NC_ND_NI	Strict definition of kryptoracemate	KRYPTORACEMIC	NO	P1	1	TRUE	FALSE	9.35	4	1	12	['C']	12	8	6	6	0	[[(2, 'SRR'), (2, 'RSS')]]	[2]	[4]	['racemic']	['C1']	4	4.0	4.0	RAC-2	contains following chiral atom(s)C	NA	7.9496	14.4053	17.2909	86.32	76.742	74.006	1852.70988387	1.37096328591	C22 H22 O6	dimethyl 10-hydroxy-8-phenyl-7,8,9,10-tetrahydro-5,10-epoxybenzo[8]annulene-6,6(5H)-dicarboxylate	100 K	None	229-232 deg.C	black	None	None	None	None	Jiantao Zhang, Zhehui Liao, Lianfen Chen, Huanfeng Jiang, Shifa Zhu
RIPDAW	RACEMIC	NC_ND_I	Strict definition of kryptoracemate + achiral molecule	KRYPTORACEMIC	NO	P1	1	TRUE	FALSE	5.65	2	1	2	['N']	0	2	1	1	0	[[(1, 'S'), (1, 'R')]]	[2]	[2]	['racemic']	['C1']	5	1.0	1.0	RAC-1	contains following chiral atom(s)N	NA	10.3932	11.8701	12.1822	99.017	98.096	113.352	1328.16410369	1.39833004396	C25 H34 N2 O3 2+,C25 H33 N2 O3 1+,3(Cl1 O4 1-)	7-(9-Anthracenylmethyl)-1,4,10-trioxa-7,13-diazoniacyclopentadecane 7-(9-anthracenylmethyl)-1,4,10-trioxa-13-aza-7-azoniacyclopentadecane triperchlorate	at 150 K	None	None	pale yellow	None	None	acetonitrile/diethyl ether	None	M.C.Aragoni, M.Arca, A.Bencini, A.J.Blake, C.Caltagirone, A.Danesi, F.A.Devillanova, A.Garau, T.Gelbrich, F.Isaia, V.Lippolis, M.B.Hursthouse, B.Valtancoli, C.Wilson
RIWKUD	RACEMIC	NC_D_I	Strict definition of kryptoracemate + achiral molecule	KRYPTORACEMIC	NO	P212121	19	TRUE	TRUE	3.2	2	1	2	['C']	2	2	1	1	0	[[(1, 'S'), (1, 'R')]]	[2]	[2]	['racemic']	['C1']	4	1.0	4.0	RAC-1	contains following chiral atom(s)C	NA	10.597	21.337	5.855	90.0	90.0	90.0	1323.86344659	1.72740632736	2(C3 H8 N1 O3 1+),O4 S1 2-,H2 O1	bis(DL-Serinium) sulfate monohydrate	None	None	None	colorless	None	None	None	None	Hong Zhang, Ximin Wang, Xienan Chang, Weiqiang Xiao, Kecong Zhang, Boon K.Teo
RIWKUD01	RACEMIC	NC_ND_I	Strict definition of kryptoracemate + achiral molecule	KRYPTORACEMIC	NO	P212121	19	TRUE	FALSE	2.7	2	1	2	['C']	2	2	1	1	0	[[(1, 'S'), (1, 'R')]]	[2]	[2]	['racemic']	['C1']	4	1.0	4.0	RAC-1	contains following chiral atom(s)C	NA	10.62	21.41	5.89	90.0	90.0	90.0	1339.234038	1.61823123049	2(C3 H8 N1 O3 1+),O4 S1 2-,H2 O1	bis(DL-Serinium) sulfate monohydrate	at 295 K	None	None	None	None	None	None	None	Yu.I.Smolin, A.E.Lapshin, I.A.Drozdova
ROBTUZ	RACEMIC	NC_ND_NI	Strict definition of kryptoracemate	KRYPTORACEMIC	NO	C2	5	TRUE	FALSE	4.46	2	1	8	['C']	8	8	4	4	0	[[(1, 'SRSS'), (1, 'RSRR')]]	[2]	[2]	['racemic']	['C1']	2	2.0	8.0	RAC-1	contains following chiral atom(s)C	NA	32.495	7.4802	17.551	90.0	105.813	90.0	4104.66006228	1.32511883129	C25 H22 F3 N1 O1	12-benzyl-13-phenyl-10-(trifluoromethyl)-11-oxa-12-azatricyclo[7.2.2.02,7]trideca-2,4,6-triene	at 123 K	None	None	colorless	None	None	None	None	K.Mori, K.Kurihara, S.Yabe, M.Yamanaka, T.Akiyama
ROKPOX	RACEMIC	NC_ND_NI	Strict definition of kryptoracemate	KRYPTORACEMIC	NO	P21	4	TRUE	FALSE	10.11	2	1	6	['C']	6	6	3	3	0	[[(1, 'SRR'), (1, 'RSS')]]	[2]	[2]	['racemic']	['C1']	2	2.0	4.0	RAC-1	contains following chiral atom(s)C	NA	10.6161	6.8123	21.2635	90.0	96.907	90.0	1526.61737481	1.27207522604	C20 H20 O2	(+-)-(3,3a,4,5,10b,10c-Hexahydroacephenanthrylene-4,4-diyl)diethanone	at 293 K	None	157-158 deg.C	colorless	None	None	ethyl acetate/hexanes	None	Ming-Chang P.Yeh, Wen-Cheng Tsao, Bo-Jen Lee, Tzu-Ling Lin
ROKPUD	RACEMIC	NC_ND_NI	Strict definition of kryptoracemate	KRYPTORACEMIC	NO	P21	4	TRUE	FALSE	5.0	2	1	6	['C']	6	6	3	3	0	[[(1, 'SRS'), (1, 'RSR')]]	[2]	[2]	['racemic']	['C1']	2	2.0	4.0	RAC-1	contains following chiral atom(s)C	NA	10.6786	6.8771	22.698	90.0	96.615	90.0	1655.79409286	1.22910109212	C21 H22 O2	(+-)-(9-Methyl-3,3a,4,5,10b,10c-hexahydroacephenanthrylene-4,4-diyl)diethanone	at 296 K	None	151-154 deg.C	colorless	None	None	ethyl acetate/hexanes	None	Ming-Chang P.Yeh, Wen-Cheng Tsao, Bo-Jen Lee, Tzu-Ling Lin
ROKTAM	RACEMIC	NC_ND_NI	Strict definition of kryptoracemate	KRYPTORACEMIC	NO	P21	4	TRUE	FALSE	4.03	2	1	2	['C']	2	2	1	1	0	[[(1, 'S'), (1, 'R')]]	[2]	[2]	['racemic']	['C1']	2	2.0	4.0	RAC-1	contains following chiral atom(s)C	NA	6.398	23.965	14.687	90.0	95.3	90.0	2242.30168639	1.1744347733	C21 H32 O7	6,6'-Di-t-butoxycarbonyl-2-methoxycarbonyl-4-methylenecyclo-octanone	None	None	None	colorless	None	None	None	None	D.Ginderow, L.Fensterbank, C.Jorand-Lebrun, M.Malacria
RUCXAQ	RACEMIC	NC_ND_NI	Strict definition of kryptoracemate	KRYPTORACEMIC	NO	P1	1	TRUE	FALSE	3.9	2	1	2	['C']	2	2	1	1	0	[[(1, 'S'), (1, 'R')]]	[2]	[2]	['racemic']	['C1']	2	2.0	2.0	RAC-1	contains following chiral atom(s)C	NA	8.8726	10.4814	11.8995	71.434	69.467	70.435	950.827585944	1.37771536527	C18 H22 N2 O6 S1	Methyl 5-cyclohexyl-5-(((4-nitrophenyl)sulfonyl)amino)penta-2,3-dienoate	at 173.1 K	None	None	colorless	None	None	None	None	M.Yoshida, T.Mizuguchi, K.Namba
RUFPIT	RACEMIC	NC_ND_NI	Strict definition of kryptoracemate	KRYPTORACEMIC	NO	P21	4	TRUE	FALSE	4.01	2	1	8	['C']	8	6	4	4	0	[[(1, 'RSRS'), (1, 'SRSR')]]	[2]	[2]	['racemic']	['C1']	2	2.0	4.0	RAC-1	contains following chiral atom(s)C	NA	12.4927	6.17535	16.8213	90.0	104.242	90.0	1257.82463401	1.39553915795	C14 H16 O5	1-methyl-3a,4',5',6,7,8b-hexahydro-1H,3'H-spiro[cyclopenta[b]furo[3,4-d]pyran-4,2'-furan]-3,8-dione	at 100.0 K	None	None	yellow	None	None	None	None	Hongliang Yao, Liyan Song, Yuan Liu, Rongbiao Tong
RUMTOK	RACEMIC	NC_ND_NI	Strict definition of kryptoracemate	KRYPTORACEMIC	NO	P212121	19	TRUE	FALSE	5.4	2	1	6	['C']	6	4	3	3	0	[[(1, 'SRR'), (1, 'RSS')]]	[2]	[2]	['racemic']	['C1']	2	2.0	8.0	RAC-1	contains following chiral atom(s)C	NA	5.9718	23.3972	31.439	90.0	90.0	90.0	4392.7639399	1.27184792632	C25 H28 N2 O2 S1	1-cyclopropyl-2a-methyl-4-((4-methylphenyl)sulfonyl)-3,4,5,6,10b,10c-hexahydro-2aH-4,6a-diazabenzo[a]cyclopenta[cd]azulene	293 K	None	None	colorless	None	None	None	None	Liang-Yong Mei, Yin Wei, Xiang-Ying Tang, Min Shi
RURBIQ	RACEMIC	NC_ND_NI	Strict definition of kryptoracemate	KRYPTORACEMIC	NO	P212121	19	TRUE	FALSE	4.77	2	1	2	['C']	2	2	1	1	0	[[(1, 'S'), (1, 'R')]]	[2]	[2]	['racemic']	['C1']	2	2.0	8.0	RAC-1	contains following chiral atom(s)C	NA	8.0516	14.837	23.102	90.0	90.0	90.0	2759.8016337	1.43567452992	C14 H13 F3 N2 O2	6-Benzyl-3-methylene-1-(2,2,2-trifluoroethyl)-2,5-piperazinedione	at 153 K	None	None	colorless	None	None	None	None	D.D.DesMarteau, Changqing Lu, D.VanDerveer
RUWHEX	RACEMIC	NC_ND_NI	Strict definition of kryptoracemate + achiral molecule	KRYPTORACEMIC	NO	P1	1	TRUE	FALSE	5.59	2	1	2	['C']	2	2	1	1	0	[[(1, 'S'), (1, 'R')]]	[2]	[2]	['racemic']	['C1']	4	2.0	2.0	RAC-1	contains following chiral atom(s)C	NA	6.6656	11.2474	12.374	89.139	85.23	87.099	923.234770649	1.53021154184	C6 H5 N1 O2,C16 H14 O6	Pyridin-1-ium-3-carboxylate rac-5,7-dihydroxy-2-(3-hydroxy-4-methoxyphenyl)-2,3-dihydro-4H-chromen-4-one	at 100 K	None	206 deg.C	colorless	None	None	None	None	P.Kavuru, D.Aboarayes, K.K.Arora, H.D.Clarke, A.Kennedy, L.Marshall, Tien Teng Ong, J.Perman, T.Pujari, L.Wojtas, M.J.Zaworotko
SABSIZ	RACEMIC	NC_ND_NI	Strict definition of kryptoracemate	KRYPTORACEMIC	NO	P21	4	TRUE	FALSE	4.14	2	1	2	['C']	2	0	1	1	0	[[(1, 'S'), (1, 'R')]]	[2]	[2]	['racemic']	['C1']	2	2.0	4.0	RAC-1	contains following chiral atom(s)C	NA	9.5993	13.799	11.5769	90.0	105.784	90.0	1475.66315926	1.26619233214	C17 H15 N1 O3	5-Benzyl-5-methyl-3-phenyl-1,3-oxazolidine-2,4-dione	at 294 K	None	None	colorless	None	None	None	None	O.Merino, B.M.Santoyo, L.E.Montiel, H.A.Jimenez-Vazquez, L.G.Zepeda, J.Tamariz
SAGFEN	RACEMIC	NC_ND_NI	Strict definition of kryptoracemate	KRYPTORACEMIC	NO	P21	4	TRUE	FALSE	5.61	4	1	16	['C']	16	16	8	8	0	[[(2, 'SSSS'), (2, 'RRRR')]]	[2]	[4]	['racemic']	['C1']	4	4.0	8.0	RAC-2	contains following chiral atom(s)C	NA	14.1361	32.2264	28.9417	90.0	90.572	90.0	13183.8968659	1.2589517164	C76 H80 O16	6,12,18,24-Tetramethoxy-4,10,16,22-tetrakis[(methoxycarbonyl)methoxy]-2,8,14,20-tetrakis(2-phenylethyl)calix[4]arene	at 173 K	None	387 K	colorless	None	None	None	None	P.B.Pansuriya, H.B.Friedrich, G.E.M.Maguire
SAGTUP	RACEMIC	NC_ND_NI	Strict definition of kryptoracemate	KRYPTORACEMIC	NO	P212121	19	TRUE	FALSE	2.9	2	1	6	['C']	6	6	3	3	0	[[(1, 'RRR'), (1, 'SSS')]]	[2]	[2]	['racemic']	['C1']	2	2.0	8.0	RAC-1	contains following chiral atom(s)C	NA	14.454	14.8	10.388	90.0	90.0	90.0	2222.1926496	1.30508583002	C13 H14 O1 S1	endo-(2SR,8SR)-Bicyclo(2.2.1)hept-5-en-2-yl phenyl sulfoxide	None	None	352-353K	white	None	None	None	None	X.Ji, D.van der Helm, R.V.Williams, W.Y.Ebey
SAKFUF	RACEMIC	NC_ND_NI	Strict definition of kryptoracemate	KRYPTORACEMIC	NO	P212121	19	TRUE	FALSE	5.8	2	1	2	['C']	2	0	1	1	0	[[(1, 'S'), (1, 'R')]]	[2]	[2]	['racemic']	['C1']	2	2.0	8.0	RAC-1	contains following chiral atom(s)C	NA	13.502	15.444	18.45	90.0	90.0	90.0	3847.2841836	1.44456940278	C16 H18 N8 O6	8-(2,4,7,9-Tetraoxo-3,6,8-trimethyl-1,3,6,8-tetra-azaspiro(4.4)non-1-yl)caffeine	None	None	298-302deg.C	None	None	None	None	None	J.Zylber, L.Ouazzani-Chahdi, D.Lefort, A.Chiaroni, C.Riche
SAPVAG	RACEMIC	NC_ND_NI	Strict definition of kryptoracemate	KRYPTORACEMIC	NO	P21	4	TRUE	FALSE	3.8	2	1	6	['C']	6	4	3	3	0	[[(1, 'RRS'), (1, 'SSR')]]	[2]	[2]	['racemic']	['C1']	2	2.0	4.0	RAC-1	contains following chiral atom(s)C	NA	17.297	6.484	17.818	90.0	115.381	90.0	1805.46918183	1.28186249398	C26 H20 O1	trans-5-Î²-Naphthyl-6-Î±-naphthylbicyclo(3.1.0)hexan-2-one	None	None	156-157deg.C	white	None	None	None	None	H.E.Zimmerman, J.D.St.Clair
SAQSAE	RACEMIC	NC_ND_NI	Strict definition of kryptoracemate	KRYPTORACEMIC	NO	P21	4	TRUE	FALSE	6.28	2	1	2	['C']	2	2	1	1	0	[[(1, 'S'), (1, 'R')]]	[2]	[2]	['racemic']	['C1']	2	2.0	4.0	RAC-1	contains following chiral atom(s)C	NA	8.91	11.133	9.089	90.0	113.56	90.0	826.429421959	1.44003848236	C9 H9 N1 O3	N-Hydroxymethyl-3-hydroxyphthalimidine	None	None	148-149deg.C	None	None	None	acetone hexane	None	A.Orzeszko, J.K.Maurin, A.Niedzwiecka-Kornas, Z.Kazimierczuk
SARQOQ	RACEMIC	NC_ND_NI	Strict definition of kryptoracemate	KRYPTORACEMIC	NO	P21	4	TRUE	FALSE	5.16	2	1	8	['C']	8	6	4	4	0	[[(1, 'SRSS'), (1, 'RSRR')]]	[2]	[2]	['racemic']	['C1']	2	2.0	4.0	RAC-1	contains following chiral atom(s)C	NA	6.2303	20.561	10.7476	90.0	96.665	90.0	1367.47579087	1.2644803067	C19 H16 O1	1,4-Methano-11a-methyl-4,4a,11,11a-tetrahydro-1H-benzo(b)fluoren-11-one	at 293 K	None	None	colorless	None	None	ethyl acetate/petroleum ether	None	A.Usman, I.A.Razak, S.Chantrapromma, S.K.Ghorai, D.Mal, Hoong-Kun Fun, G.D.Nigam
SARZUG	RACEMIC	NC_ND_I	Strict definition of kryptoracemate + achiral molecule	KRYPTORACEMIC	NO	P1	1	TRUE	FALSE	7.9	2	1	2	['C']	2	2	1	1	0	[[(1, 'S'), (1, 'R')]]	[2]	[2]	['racemic']	['C1']	4	2.0	2.0	RAC-1	contains following chiral atom(s)C	NA	11.853	12.715	12.978	80.42	62.15	85.84	1705.2302396	1.14832552242	C24 H20 B1 1-,C14 H28 N3 O2 1+	2-Ethylammonio-N-(pivaloyl-D,L-prolyl)ethylamine tetraphenylborate	None	None	None	None	None	None	None	x(C11) in molecule L (C111) is 0.4902 not 0.4209	L.El Masdouri, A.Aubry, C.Sakarellos, E.J.Gomez, M.T.Cung, M.Marraud
SAXBIF	RACEMIC	NC_ND_NI	Strict definition of kryptoracemate	KRYPTORACEMIC	NO	P212121	19	TRUE	FALSE	5.78	2	1	6	['C']	6	6	3	3	0	[[(1, 'SRR'), (1, 'RSS')]]	[2]	[2]	['racemic']	['C1']	2	2.0	8.0	RAC-1	contains following chiral atom(s)C	NA	9.9801	18.854	26.1414	90.0	90.0	90.0	4918.89144388	1.16818435793	C27 H32 N2 O3	N-{3-[(2,2-dimethylpropanoyl)amino]-2-methyl-3-(5-methylfuran-2-yl)-1-phenylpropyl}benzamide	173 K	None	None	colorless	None	None	None	None	P.Kramer, M.Bolte
SAXBOL	RACEMIC	NC_ND_NI	Strict definition of kryptoracemate + achiral molecule	KRYPTORACEMIC	NO	P1	1	TRUE	FALSE	7.89	4	1	12	['C']	12	12	6	6	0	[[(2, 'SRR'), (2, 'RSS')]]	[2]	[4]	['racemic']	['C1']	6	4.0	4.0	RAC-2	contains following chiral atom(s)C	NA	10.1501	14.8556	17.662	109.248	97.929	91.214	2483.93536568	1.1952086603	C25 H28 N2 O3,0.5(C1 H2 Cl2)	N-[2-methyl-3-(5-methylfuran-2-yl)-1-phenyl-3-(propanoylamino)propyl]benzamide dichloromethane solvate	173 K	None	None	colorless	None	None	None	None	P.Kramer, M.Bolte
SAXZAT	RACEMIC	NC_ND_NI	Strict definition of kryptoracemate	KRYPTORACEMIC	NO	P21	4	TRUE	FALSE	7.93	2	1	4	['C']	4	4	2	2	0	[[(1, 'SS'), (1, 'RR')]]	[2]	[2]	['racemic']	['C1']	2	2.0	4.0	RAC-1	contains following chiral atom(s)C	NA	5.76	17.916	19.174	90.0	98.54	90.0	1956.74438746	1.16921678068	C24 H24 O2	3-syn-Î±-methyl-Î²-anisyl-Î³-phenylbutyrophenone	at 293 K	None	348 K	colorless	None	None	Chloroform/hexane	None	N.Singhal, A.L.Koner, P.Mal, P.Venugopalan, W.M.Nau, J.N.Moorthy
SEJTAC	RACEMIC	NC_ND_NI	Strict definition of kryptoracemate	KRYPTORACEMIC	NO	P212121	19	TRUE	FALSE	2.6	2	1	8	['C']	8	6	4	4	0	[[(1, 'RSRS'), (1, 'SRSR')]]	[2]	[2]	['racemic']	['C1']	2	2.0	8.0	RAC-1	contains following chiral atom(s)C	NA	10.2077	13.6714	20.5221	90.0	90.0	90.0	2863.93190394	1.29108842442	C16 H22 O4	Methyl 1,10-cis-1,2-transoid-2,7-cis-8,14-dioxotricyclo(8.4.0.02,7)tetradecane-1-carboxylate	None	None	None	None	None	None	None	None	A.G.Michel, N.Michel-Dewez, R.Ruel
SEMWAJ	RACEMIC	NC_ND_NI	Strict definition of kryptoracemate	KRYPTORACEMIC	NO	P21	4	TRUE	FALSE	3.92	2	1	2	['C']	2	2	1	1	0	[[(1, 'S'), (1, 'R')]]	[2]	[2]	['racemic']	['C1']	2	2.0	4.0	RAC-1	contains following chiral atom(s)C	NA	8.5605	13.2696	16.2115	90.0	93.488	90.0	1838.12446074	1.29884904172	C19 H21 N1 O4 S1	3-[2-(4-methoxyphenyl)ethyl]-2-propionyl-2,3-dihydro-1,2-benzisothiazole 1,1-dioxide	at 220 K	None	None	colorless	None	None	diethyl ether	None	S.Parsons, M.Andrews, R.Ramage, R.Johnstone
SEPFOI	RACEMIC	NC_ND_NI	Strict definition of kryptoracemate	KRYPTORACEMIC	NO	P21	4	TRUE	FALSE	4.6	2	1	6	['C']	6	4	3	3	0	[[(1, 'SRS'), (1, 'RSR')]]	[2]	[2]	['racemic']	['C1']	2	2.0	4.0	RAC-1	contains following chiral atom(s)C	NA	7.585	23.966	9.825	90.0	99.83	90.0	1759.78818971	1.2848651345	C20 H24 N2 O3	2,8-Diketo-10-(1-methylethenyl)-9-(4-methoxybenzyl)-3,9-diazatricyclo(5.2.2.03,7)undecane	at 143 K	None	128.5-129.5deg.C	colorless	None	None	None	None	R.M.Williams, T.Glinka, E.Kwast, H.Coffman, J.K.Stille
SEPXUI	RACEMIC	NC_ND_NI	Strict definition of kryptoracemate	KRYPTORACEMIC	NO	P212121	19	TRUE	FALSE	4.12	2	1	6	['C']	6	6	3	3	0	[[(1, 'SRR'), (1, 'RSS')]]	[2]	[2]	['racemic']	['C1']	2	2.0	8.0	RAC-1	contains following chiral atom(s)C	NA	9.2047	12.9635	24.7453	90.0	90.0	90.0	2952.73610103	1.25700192985	C15 H21 N1 O2 S1	1-(3-Hydroxy-2-(hydroxy(phenyl)methyl)azetidin-1-yl)-2,2-dimethylpropane-1-thione	at 150 K	None	None	pale colorless	None	None	None	None	D.M.Hodgson, C.I.Pearson, A.L.Thompson
SEQGAX01	RACEMIC	NC_ND_I	Contains also at least an other enantiomer in enantiopure proportion	KRYPTORACEMIC	NO	P212121	19	TRUE	FALSE	4.21	4	2	8	['C']	8	8	2	6	0	[[(2, 'SS')], [(1, 'SS'), (1, 'RR')]]	[1, 2]	[2, 2]	['chiral', 'racemic']	['C1']	4	2.0	8.0	RAC-1	contains following chiral atom(s)C	NA	11.1297	13.4914	28.0333	90.0	90.0	90.0	4209.34673755	1.14713994492	C11 H18 N1 O2 1+,C10 H15 O2 1-	(1S,2S)-(+)-2-Dimethylamino-1-phenyl-1,3-propanediol (+-)-trans-chrysanthemic acid	at 293 K	None	None	pale yellow	None	None	None	None	G.Rosini, C.Ayoub, V.Borzatta, A.Mazzanti, E.Marotta, P.Righi
SIFMOK	RACEMIC	NC_ND_NI	Strict definition of kryptoracemate	KRYPTORACEMIC	NO	P41	76	TRUE	FALSE	4.86	2	1	4	['C']	4	0	2	2	0	[[(1, 'SS'), (1, 'RR')]]	[2]	[2]	['racemic']	['C1']	2	2.0	8.0	RAC-1	contains following chiral atom(s)C	NA	17.121	17.121	19.397	90.0	90.0	90.0	5685.81624948	1.16934675511	C25 H45 P5	2,2b,3,4,4b-penta-t-butyl-4bH-1,2a,2c,4a,4c-pentaphosphacyclobuta[a]cyclopropa[cd]pentalene	at 150 K	None	112-114 deg.C	None	None	None	None	None	C.Jones, C.Schulten, A.Stasch
SIHDEV	RACEMIC	NC_ND_NI	Strict definition of kryptoracemate	KRYPTORACEMIC	NO	P21	4	TRUE	FALSE	3.72	2	1	4	['C']	4	2	2	2	0	[[(1, 'SR'), (1, 'RS')]]	[2]	[2]	['racemic']	['C1']	2	2.0	4.0	RAC-1	contains following chiral atom(s)C	NA	5.53828	24.4737	8.98955	90.0	91.211	90.0	1218.19126247	1.36469727254	C14 H18 O4	7,9-dimethoxy-3,4,5,6-tetrahydro-2H-2,6-methano-1-benzoxocin-2-ol	100 K	None	None	colorless	None	None	None	None	Hanbin Lee, M.V.Mane, Ho Ryu, D.Sahu, Mu-Hyun Baik, C.S.Yi
SIKCAR	RACEMIC	NC_ND_NI	Strict definition of kryptoracemate	KRYPTORACEMIC	NO	P21	4	TRUE	FALSE	3.14	2	1	2	['C']	2	0	1	1	0	[[(1, 'S'), (1, 'R')]]	[2]	[2]	['racemic']	['C1']	2	2.0	4.0	RAC-1	contains following chiral atom(s)C	NA	6.7633	13.7539	17.2571	90.0	96.485	90.0	1595.01418664	1.21342553828	C20 H21 N1 O1	3,3,5-Trimethyl-10b-phenyl-2,3-dihydro-10bH-(1,3)oxazolo(2,3-a)isoquinoline	at 293 K	None	55-56 deg.C	red	None	None	None	The structure deposited appears to be 7c rather than 7a as stated in the paper	V.Capriati, S.Florio, R.Luisi, F.M.Perna
SINPEL	RACEMIC	NC_ND_NI	Strict definition of kryptoracemate	KRYPTORACEMIC	NO	P43212	96	TRUE	FALSE	3.8	2	1	10	['C']	10	8	5	5	0	[[(1, 'RRSSS'), (1, 'SSRRR')]]	[2]	[2]	['racemic']	['C1']	2	2.0	16.0	RAC-1	contains following chiral atom(s)C	NA	15.9319	15.9319	43.2823	90.0	90.0	90.0	10986.1487383	1.31454603681	C30 H29 N3 O7	Methyl (1S*,2S*,3R*,5R*,6R*)-1-(methoxycarbonylmethyl)-1-hydroxy-7-oxo-3,5-diphenyl-6-(benzoylamino)tetrahydro-1H,5H-pyrazolo(1,2-a)pyrazole-2-carboxylate	at 293 K	None	None	colorless	None	None	None	None	L.Pezdirc, D.Bevk, U.Groselj, A.Meden, B.Stanovnik, J.Svete
SODTEM	RACEMIC	NC_ND_NI	Strict definition of kryptoracemate	KRYPTORACEMIC	NO	P212121	19	TRUE	FALSE	3.44	2	1	8	['C']	8	8	4	4	0	[[(1, 'RSSS'), (1, 'SRRR')]]	[2]	[2]	['racemic']	['C1']	2	2.0	8.0	RAC-1	contains following chiral atom(s)C	NA	11.211	16.7616	18.3398	90.0	90.0	90.0	3446.31063512	1.43887291529	C20 H21 Br1 O2	(1R,4aS,8S,8aS)-1-(2-bromophenyl)-8-phenylhexahydro-1H,3H-pyrano[3,4-c]pyran	at 294 K	None	None	colorless	None	None	None	None	B.V.Subba Reddy, M.Ramana Reddy, B.Sridhar, K.K.Singarapu
SOGSOW	RACEMIC	NC_ND_I	Strict definition of kryptoracemate + achiral molecule	KRYPTORACEMIC	NO	P1	1	TRUE	FALSE	5.4	2	1	2	['C']	2	2	1	1	0	[[(1, 'S'), (1, 'R')]]	[2]	[2]	['racemic']	['C1']	4	2.0	2.0	RAC-1	contains following chiral atom(s)C	NA	6.42	10.161	15.832	82.47	84.16	77.55	996.909738208	1.22549858888	C19 H26 N1 O4 1+,Cl1 1-	1-(2-(Ethoxycarbonyl)propan-2-ylamino)-3-(1-naphthyloxy)propan-2-ol hydrochloride	None	None	None	None	None	None	None	None	G.D.Bujacz, M.W.Wieczorek, E.Galas, J.Zjawiony, A.Wojciechowska
SOPTUM	RACEMIC	NC_ND_NI	Strict definition of kryptoracemate	KRYPTORACEMIC	NO	P41212	92	TRUE	FALSE	8.9	2	1	2	['C']	2	2	1	1	0	[[(1, 'S'), (1, 'R')]]	[2]	[2]	['racemic']	['C1']	2	2.0	16.0	RAC-1	contains following chiral atom(s)C	NA	10.895	10.895	46.308	90.0	90.0	90.0	5496.8070657	1.21971644817	C15 H24 O3	3-(1-Hydroxycyclohexyl)-1-oxaspiro(4.5)decan-2-one	at 97 K	None	110-112deg.C	None	None	None	None	None	R.Csuk, Zhong Hu, M.Abdou, C.Kratky
SOQQOE	RACEMIC	NC_ND_NI	Strict definition of kryptoracemate	KRYPTORACEMIC	NO	P1	1	TRUE	FALSE	5.35	4	1	12	['C']	12	8	9	3	0	[[(3, 'RRR'), (1, 'SSS')]]	[2]	[4]	['racemic']	['C1']	4	4.0	4.0	RAC-2	contains following chiral atom(s)C	NA	10.156	13.5371	14.153	113.668	95.864	102.856	1697.03184856	1.30097528628	C22 H20 O3	6-(Dimethoxymethylene)-dibenzo(d,k)tricyclo(5.2.2.03,7)undeca-4,10-dien-8-one	at 158 K	None	None	colorless	None	None	None	None	M.J.Heileman, H.W.Moore
SOXWOR	RACEMIC	NC_ND_NI	Strict definition of kryptoracemate + achiral molecule	KRYPTORACEMIC	NO	P1	1	TRUE	FALSE	5.8	2	1	2	['C']	2	2	1	1	0	[[(1, 'S'), (1, 'R')]]	[2]	[2]	['racemic']	['C1']	4	2.0	2.0	RAC-1	contains following chiral atom(s)C	NA	11.412	8.305	7.877	109.24	104.34	103.03	643.267100325	1.39009146139	C12 H13 N1 O5,H2 O1	N-Benzoyl-L,D-glutamic acid monohydrate	None	None	None	None	None	None	None	None	N.E.Zhukhlistova, V.I.Smirnova, Yu.V.Nekrasov, G.N.Tishchenko
SUDREQ	RACEMIC	NC_ND_NI	Strict definition of kryptoracemate	KRYPTORACEMIC	NO	P21	4	TRUE	FALSE	8.52	4	1	4	['C']	4	0	2	2	0	[[(2, 'S'), (2, 'R')]]	[2]	[4]	['racemic']	['C1']	4	4.0	8.0	RAC-2	contains following chiral atom(s)C	NA	6.4904	31.149	13.673	90.0	90.4	90.0	2764.1957947	1.20306856455	C18 H18 O1	3b-phenyl-1,3b,4,5,6,7-hexahydrocyclopenta[a]inden-3(2H)-one	at 293 K	None	None	colorless	None	None	None	None	Gen-Qiang Chen, Xiang-Ying Tang, Min Shi
SUGVUL	RACEMIC	NC_ND_NI	Strict definition of kryptoracemate	KRYPTORACEMIC	NO	P212121	19	TRUE	FALSE	6.26	2	1	4	['C']	4	4	2	2	0	[[(1, 'SR'), (1, 'RS')]]	[2]	[2]	['racemic']	['C1']	2	2.0	8.0	RAC-1	contains following chiral atom(s)C	NA	9.327	9.354	32.915	90.0	90.0	90.0	2871.66120957	1.36264525486	C12 H22 S4	2,5,9,12-Tetrathiabicyclo(11.2.1)hexadecane	at -160 deg.C	None	None	colorless	None	None	None	None	J.M.Desper, J.R.Vyvyan, M.J.Mayer, L.A.Ochrymowycz, S.H.Gellman
SUMMUK	RACEMIC	NC_ND_NI	Strict definition of kryptoracemate	KRYPTORACEMIC	NO	P212121	19	TRUE	FALSE	2.89	2	1	4	['C']	4	2	2	2	0	[[(1, 'SR'), (1, 'RS')]]	[2]	[2]	['racemic']	['C1']	2	2.0	8.0	RAC-1	contains following chiral atom(s)C	NA	6.86998	15.21957	27.0563	90.0	90.0	90.0	2828.9564441	1.27402859582	C16 H17 N1 O3	cis-1-Benzyl-5-(3-furyl)-3-hydroxy-3-methylpyrrolidin-2-one	100 K	None	131-132 deg.C	light yellow	None	None	None	None	M.A.H.Salih, L.Male, N.Spencer, J.S.Fossey
SUPRIF	RACEMIC	NC_ND_NI	Strict definition of kryptoracemate	KRYPTORACEMIC	NO	P212121	19	TRUE	FALSE	5.24	2	1	8	['C']	8	6	4	4	0	[[(1, 'RSSS'), (1, 'SRRR')]]	[2]	[2]	['racemic']	['C1']	2	2.0	8.0	RAC-1	contains following chiral atom(s)C	NA	13.3018	14.3633	29.328	90.0	90.0	90.0	5603.34151427	1.32904489122	C31 H32 N2 O8	(1-Benzyl-4,6-dimethyl-2-((4-nitrobenzoyl)oxy)cycloheptyl)methyl 4-nitrobenzoate	at 123.1 K	None	None	None	None	None	hexane/dichloromethane	None	T.Hashimoto, Y.Naganawa, K.Maruoka
TABLUD	RACEMIC	NC_ND_NI	Strict definition of kryptoracemate	KRYPTORACEMIC	NO	P21	4	TRUE	FALSE	4.1	2	1	2	['C']	2	0	1	1	0	[[(1, 'S'), (1, 'R')]]	[2]	[2]	['racemic']	['C1']	2	2.0	4.0	RAC-1	contains following chiral atom(s)C	NA	9.734	17.075	9.764	90.0	96.4	90.0	1612.74163416	1.17548444655	C16 H19 N1 O2 Si1	2-(Trimethylsilyl)-3-methyl-3H-benz(f)indol-3-yl hydroperoxide	None	None	389 K	golden yellow	None	None	None	None	G.A.Morales, F.R.Fronczek
TADPIZ	RACEMIC	NC_ND_NI	Strict definition of kryptoracemate	KRYPTORACEMIC	NO	P21	4	TRUE	FALSE	3.44	2	1	2	['C']	2	2	1	1	0	[[(1, 'S'), (1, 'R')]]	[2]	[2]	['racemic']	['C1']	2	2.0	4.0	RAC-1	contains following chiral atom(s)C	NA	11.6442	24.372	13.0153	90.0	98.82	90.0	3649.96613914	1.23162271653	C48 H36 O4	2-(3-(4-Methoxyphenyl)-5-((4-methoxyphenyl)ethynyl)-4,6-diphenyl-4H-pyran-2-yl)-1,3-diphenylprop-2-en-1-one	at 173 K	None	None	light yellow	None	None	None	None	Xiuzhao Yu, Zhongyan Cao, Junliang Zhang
TAKJUN	RACEMIC	NC_ND_I	Contains also at least an other enantiomer in enantiopure proportion	KRYPTORACEMIC	NO	P21	4	TRUE	FALSE	5.11	8	2	12	['C']	12	8	6	6	0	[[(4, 'SR')], [(2, 'S'), (2, 'R')]]	[1, 2]	[4, 4]	['chiral', 'racemic']	['C1']	8	4.0	8.0	RAC-2	contains following chiral atom(s)C	NA	12.78	10.411	32.574	90.0	97.6	90.0	4295.9824115	1.34983704735	C11 H13 N2 O2 1+,C10 H15 O4 S1 1-	1-carboxy-2-(1H-indol-3-yl)ethanaminium (7,7-dimethyl-2-oxobicyclo[2.2.1]hept-1-yl)methanesulfonate	173 K	None	None	colorless	None	None	None	None	A.Sayed, A.Jacobs
TAKKAU	RACEMIC	NC_ND_I	Contains also at least an other enantiomer in enantiopure proportion	KRYPTORACEMIC	NO	P21	4	TRUE	FALSE	4.84	8	2	12	['C']	12	8	6	6	0	[[(4, 'RS')], [(2, 'S'), (2, 'R')]]	[1, 2]	[4, 4]	['chiral', 'racemic']	['C1']	8	4.0	8.0	RAC-2	contains following chiral atom(s)C	NA	12.783	10.41	32.564	90.0	97.44	90.0	4296.8427768	1.34956676682	C11 H13 N2 O2 1+,C10 H15 O4 S1 1-	1-carboxy-2-(1H-indol-3-yl)ethanaminium (7,7-dimethyl-2-oxobicyclo[2.2.1]hept-1-yl)methanesulfonate	173 K	None	None	colorless	None	None	None	None	A.Sayed, A.Jacobs
TALBEP	RACEMIC	NC_ND_I	Strict definition of kryptoracemate + achiral molecule	KRYPTORACEMIC	NO	P43	78	TRUE	FALSE	10.47	4	1	4	['C']	4	4	2	2	0	[[(2, 'S'), (2, 'R')]]	[2]	[4]	['racemic']	['C1']	8	4.0	16.0	RAC-2	contains following chiral atom(s)C	NA	14.323	14.323	26.922	90.0	90.0	90.0	5523.00331334	1.31939310579	C8 H7 O3 1-,C6 H7 N2 O1 1+	pyridinium-4-aldoxime hydroxy(phenyl)acetate	at 199 K	None	None	colorless	None	None	None	None	B.B.Ivanova, M.Spiteller
TAQKAZ	RACEMIC	NC_ND_NI	Strict definition of kryptoracemate	KRYPTORACEMIC	NO	P212121	19	TRUE	FALSE	4.07	2	1	8	['C']	8	8	4	4	0	[[(1, 'RRSR'), (1, 'SSRS')]]	[2]	[2]	['racemic']	['C1']	2	2.0	8.0	RAC-1	contains following chiral atom(s)C	NA	7.8817	21.6825	26.7758	90.0	90.0	90.0	4575.84927666	1.15410313794	C19 H31 N1 O6 Si1	Dimethyl 4-((t-butyl(dimethyl)silyl)oxy)-3-cyano-6-methoxy-5-methylcyclohex-4-ene-1,2-dicarboxylate	at 173 K	None	None	colorless	None	None	None	None	C.A.Kuttruff, S.Geiger, M.Cakmak, P.Mayer, D.Trauner
TARPEK	RACEMIC	NC_ND_NI	Strict definition of kryptoracemate	KRYPTORACEMIC	NO	P212121	19	TRUE	FALSE	4.48	2	1	2	['C']	2	2	1	1	0	[[(1, 'S'), (1, 'R')]]	[2]	[2]	['racemic']	['C1']	2	2.0	8.0	RAC-1	contains following chiral atom(s)C	NA	11.2372	12.0129	25.2812	90.0	90.0	90.0	3412.7435674	1.29771339899	C20 H19 N3 O2	ethyl 5-azido-2-([1,1'-biphenyl]-4-yl)cyclopent-1-ene-1-carboxylate	140 K	None	None	colorless	None	None	None	None	E.Lopez, L.A.Lopez
TAWFAA	RACEMIC	NC_ND_NI	Strict definition of kryptoracemate	KRYPTORACEMIC	NO	P21	4	TRUE	FALSE	2.33	4	1	24	['C']	24	20	12	12	0	[[(2, 'SSRRRR'), (2, 'RRSSSS')]]	[2]	[4]	['racemic']	['C1']	4	4.0	8.0	RAC-2	contains following chiral atom(s)C	NA	13.337	17.093	17.547	90.0	105.324	90.0	3857.95890894	1.34098857129	C24 H23 N1 O4	3-Methoxy-5-(4-methoxyphenyl)-8-methyl-9-phenyl-4-azatricyclo[4.3.1.03,7]dec-4-ene-2,10-dione	at 102 K	None	None	colorless	None	None	ethyl acetate	None	J.R.Goodell, J.L.Poole, A.B.Beeler, J.Aube, J.A.Porco Junior
TAZKUC	RACEMIC	NC_ND_NI	Strict definition of kryptoracemate	KRYPTORACEMIC	NO	P212121	19	TRUE	FALSE	4.37	2	1	8	['C']	8	4	4	4	0	[[(1, 'RSSS'), (1, 'SRRR')]]	[2]	[2]	['racemic']	['C1']	2	2.0	8.0	RAC-1	contains following chiral atom(s)C	NA	8.582	13.251	20.272	90.0	90.0	90.0	2305.3335023	1.205983208	C12 H19 N1 O2	(1R,2S,5S,6S)-2-Hydroxy-1-isopropyl-5-methyl-8-oxabicyclo[3.2.1]octane-6-carbonitrile	at 100 K	None	None	colorless	None	None	hexanes	None	Jing Xu, E.J.E.Caro-Diaz, A.Batova, S.D.E.Sullivan, E.A.Theodorakis
TEFDIT	RACEMIC	NC_ND_NI	Strict definition of kryptoracemate	KRYPTORACEMIC	NO	P21	4	TRUE	FALSE	3.84	2	1	6	['C']	6	4	3	3	0	[[(1, 'RRR'), (1, 'SSS')]]	[2]	[2]	['racemic']	['C1']	2	2.0	4.0	RAC-1	contains following chiral atom(s)C	NA	14.475	10.79	9.295	90.0	102.73	90.0	1416.05706524	1.54895658498	C12 H12 F6 N2 O2	trans-2,8-dimethoxy-4,5-bis(trifluoromethyl)-1-azabicyclo(4.2.0)oct-5-en-4-carbonitrile	at 193 K	None	None	colorless	None	None	None	None	G.U.Desmison, R.Huisgen, H.Noth
TETBUS02	RACEMIC	NC_ND_NI	Strict definition of kryptoracemate	KRYPTORACEMIC	NO	C2	5	TRUE	FALSE	6.57	8	1	8	['C']	8	8	4	4	0	[[(4, 'S'), (4, 'R')]]	[2]	[8]	['racemic']	['C1']	8	8.0	32.0	RAC-2	contains following chiral atom(s)C	NA	48.6095	4.7459	36.4945	90.0	126.975	90.0	6726.02539253	1.14710668364	C7 H15 N1 O2	2-azaniumylheptanoate	145 K	None	None	colorless	polymorph II	None	None	None	M.M.H.Smets, M.B.Pitak, J.Cadden, V.R.Kip, G.A.de Wijs, E.R.H.van Eck, P.Tinnemans, Hugo Meekes, Elias Vlieg, S.J.Coles, H.M.Cuppen
TICMEA	RACEMIC	NC_ND_NI	Strict definition of kryptoracemate	KRYPTORACEMIC	NO	P212121	19	TRUE	FALSE	6.0	2	1	2	['C']	2	2	1	1	0	[[(1, 'S'), (1, 'R')]]	[2]	[2]	['racemic']	['C1']	2	2.0	8.0	RAC-1	contains following chiral atom(s)C	NA	10.5865	13.7407	21.5096	90.0	90.0	90.0	3128.91376466	1.38736765966	C19 H15 Cl1 O3	2-(4-chlorophenyl)-3-(1,4-dioxan-2-yl)-1H-inden-1-one	293 K	None	None	yellow	None	None	None	None	Xiao-Tong Zhu, Tian-Shu Zhang, Qi Zhao, Pei-Jun Cai, Wen-Juan Hao, Shu-Jiang Tu, Bo Jiang
TIFQEE	RACEMIC	NC_ND_NI	Strict definition of kryptoracemate	KRYPTORACEMIC	NO	P21	4	TRUE	FALSE	22.02	2	1	4	['C']	4	0	2	2	0	[[(1, 'SS'), (1, 'RR')]]	[2]	[2]	['racemic']	['C1']	2	2.0	4.0	RAC-1	contains following chiral atom(s)C	NA	9.517	13.281	23.631	90.0	101.008	90.0	2931.89039859	1.25193532568	C34 H32 O7	3-Hydroxy-2-(2-hydroxy-4-isopropoxybenzoyl)-7-isopropoxy-2-phenylisoflavone	at 293 K	None	212-217deg.C	colorless	None	None	hexane	None	M.Varga, S.Batori, M.Kovari-Radkai, I.Prohaszka-Nemet, M.Vitanyi-Morvai, Z.Bocskey, S.Bokotey, K.Simon, I.Hermecz
TIKHOL	RACEMIC	NC_D_I	Strict definition of kryptoracemate + achiral molecule	KRYPTORACEMIC	NO	C2	5	TRUE	TRUE	3.53	2	1	24	['C']	24	24	12	12	0	[[(1, 'RSRRSRRRRSRS'), (1, 'SRSSRSSSSRSR')]]	[2]	[2]	['racemic']	['D2']	17	1.0	4.0	RAC-1	contains following chiral atom(s)C	NA	19.8425	15.259	20.1825	90.0	114.567	90.0	5557.6159451	3.09051735048	C34 H36 N24 O12,C6 H10 N2 2+,2(I1 1-),9(H2 O1)	(+-)-Nor-seco-cucurbit(6)uril 1,4-diammoniobenzene clathrate bis(iodide) nonahydrate	at 220 K	None	None	colorless	None	None	None	None	Wei-Hao Huang, P.Y.Zavalij, L.Isaacs
TIMLUY	RACEMIC	NC_ND_NI	Strict definition of kryptoracemate	KRYPTORACEMIC	NO	R3	146	TRUE	FALSE	25.11	2	1	4	['C']	4	0	2	2	0	[[(1, 'SS'), (1, 'RR')]]	[2]	[2]	['racemic']	['C1']	2	2.0	18.0	RAC-1	contains following chiral atom(s)C	NA	20.0433	20.0433	18.7746	90.0	90.0	120.0	6531.90377662	1.41978427057	C15 H13 F3 N2 O2	N-(9b-Cyano-1,3,4,9b-tetrahydrodibenzo[b,d]furan-4a(2H)-yl)-2,2,2-trifluoroacetamide	213.1 K	None	None	None	None	None	n-hexane/ethyl acetate	None	N.Takeda, M.Ueda, S.Kagehira, H.Komei, N.Tohnai, M.Miyata, T.Naito, O.Miyata
TIRGEI	RACEMIC	NC_ND_NI	Strict definition of kryptoracemate	KRYPTORACEMIC	NO	P1	1	TRUE	FALSE	5.45	2	1	6	['C']	6	6	3	3	0	[[(1, 'SRS'), (1, 'RSR')]]	[2]	[2]	['racemic']	['C1']	2	2.0	2.0	RAC-1	contains following chiral atom(s)C	NA	7.359	7.989	12.405	83.867	80.951	87.08	715.671125411	1.30080626844	C15 H20 O5	3-((2,4-Dimethoxy-6-methylphenyl)(hydroxy)methyl)-4-methyldihydrofuran-2(3H)-one	at 293 K	None	None	None	None	None	None	None	Biswajit Panda, T.K.Sarkar
TITYOM	RACEMIC	NC_ND_NI	Strict definition of kryptoracemate	KRYPTORACEMIC	NO	P212121	19	TRUE	FALSE	3.53	2	1	4	['C']	4	2	2	2	0	[[(1, 'SS'), (1, 'RR')]]	[2]	[2]	['racemic']	['C1']	2	2.0	8.0	RAC-1	contains following chiral atom(s)C	NA	8.0051	17.9833	28.7749	90.0	90.0	90.0	4142.38035842	1.50192848112	C24 H22 Br1 N1 O4	4-((3-Bromophenyl)(hydroxy)methyl)-2,2,4-trimethyl-3-(1-naphthoyl)-1,3-oxazolidin-5-one	at 100 K	None	None	colorless	None	None	None	None	B.Viswambharan, D.Gori, R.Guillot, C.Kouklovsky, V.Alezra
TITZED	RACEMIC	NC_ND_NI	Strict definition of kryptoracemate	KRYPTORACEMIC	NO	P21	4	TRUE	FALSE	4.85	2	1	4	['C']	4	4	2	2	0	[[(1, 'SS'), (1, 'RR')]]	[2]	[2]	['racemic']	['C1']	2	2.0	4.0	RAC-1	contains following chiral atom(s)C	NA	9.664	10.003	14.245	90.0	109.73	90.0	1296.20858634	1.39515228441	C14 H15 F3 O2	3,3-Dimethyl-6-phenyl-5-(trifluoromethyl)tetrahydro-2H-pyran-2-one	at 90 K	None	None	None	None	None	None	None	Yusuke Yasu, Y.Arai, R.Tomita, T.Koike, M.Akita
TMENQU	RACEMIC	NC_ND_NI	Strict definition of kryptoracemate	KRYPTORACEMIC	NO	P21	4	TRUE	FALSE	6.0	2	1	2	['C']	2	0	1	1	0	[[(1, 'S'), (1, 'R')]]	[2]	[2]	['racemic']	['C1']	2	2.0	4.0	RAC-1	contains following chiral atom(s)C	NA	9.143	23.919	8.498	90.0	107.7	90.0	1770.4638809	1.43113089616	C20 H15 N1 O3 S2	2,3-Dihydro-2-methoxy-2-methyl-3-(benzo-1,3-thiazole-2-thiomethylene)-1,4-naphthoquinone	None	None	135-140deg.C	yellow	None	None	None	C6 y should be 0.2774	T.J.King, R.H.Thomson, R.D.Worthington
TOLRUK	RACEMIC	NC_D_I	Contains also at least an other enantiomer in enantiopure proportion + achiral molecule	KRYPTORACEMIC	NO	P1	1	TRUE	TRUE	4.93	4	2	16	['C' 'N']	14	14	5	11	0	[[(1, 'S'), (1, 'R')], [(2, 'SRSSSSR')]]	[2, 1]	[2, 2]	['racemic', 'chiral']	['C1']	8	2.0	2.0	Wa-could be Diast	contains following chiral atom(s)C,N	NA	7.778	11.832	19.307	89.0	81.92	89.03	1758.71483901	1.39880215077	C23 H27 N2 O4 1+,C11 H9 N2 O7 1-,2(C1 H4 O1)	2,3-dimethoxy-10-oxostrychnidin-19-ium 3-carboxy-2-[(3-nitrobenzene-1-carbonyl)amino]propanoate methanol solvate	100 K	None	None	colorless	None	None	None	None	E.Ganczar, A.Bialonska, Z.Ciunik
TOPSOI	RACEMIC	NC_ND_NI	Strict definition of kryptoracemate	KRYPTORACEMIC	NO	P21	4	TRUE	FALSE	6.09	2	1	2	['C']	2	2	1	1	0	[[(1, 'S'), (1, 'R')]]	[2]	[2]	['racemic']	['C1']	2	2.0	4.0	RAC-1	contains following chiral atom(s)C	NA	4.964	23.227	10.277	90.0	90.248	90.0	1184.91495547	1.52867077813	C11 H9 Cl1 O4 S1	3-Chloro-5-hydroxy-4-[(4-methylphenyl)sulfinyl]furan-2(5H)-one	296 K	None	411 K	colorless	None	None	None	None	L.Z.Latypova, E.Sh.Saigitbatalova, D.R.Chulakova, O.A.Lodochnikova, A.R.Kurbangalieva, E.A.Berdnikov, G.A.Chmutova
TOPSUO	RACEMIC	NC_ND_NI	Strict definition of kryptoracemate	KRYPTORACEMIC	NO	P21	4	TRUE	FALSE	11.49	2	1	2	['C']	2	2	1	1	0	[[(1, 'S'), (1, 'R')]]	[2]	[2]	['racemic']	['C1']	2	2.0	4.0	RAC-1	contains following chiral atom(s)C	NA	4.902	22.738	10.603	90.0	90.13	90.0	1181.82510858	1.89725094033	C10 H6 Br1 Cl1 O4 S1	4-[(4-Bromophenyl)sulfinyl]-3-chloro-5-hydroxyfuran-2(5H)-one	at 296 K	None	420 K	colorless	None	None	None	None	L.Z.Latypova, E.Sh.Saigitbatalova, D.R.Chulakova, O.A.Lodochnikova, A.R.Kurbangalieva, E.A.Berdnikov, G.A.Chmutova
TOQJAK	RACEMIC	NC_ND_NI	Strict definition of kryptoracemate	KRYPTORACEMIC	NO	P1	1	TRUE	FALSE	2.0	2	1	2	['Te']	0	0	1	1	0	[[(1, 'S'), (1, 'R')]]	[2]	[2]	['racemic']	['C1']	2	2.0	2.0	RAC-1	contains following chiral atom(s)Te	NA	7.546	9.914	10.092	59.42	63.35	76.82	580.93563718	2.02274881395	C14 H10 O3 Te1	1,1'-Spiro-bi(3H-2,1-benzotellurole)-3-one	None	None	278deg.C	colorless	None	None	None	None	Y.Takaguchi, N.Furukawa
TUCMIP	RACEMIC	NC_D_I	Contains also at least an other enantiomer in enantiopure proportion + achiral molecule	KRYPTORACEMIC	NO	P21	4	TRUE	TRUE	12.62	6	2	36	['C']	36	36	22	14	0	[[(2, 'S'), (2, 'R')], [(2, 'SSSRRRSRSRRRSRRR')]]	[2, 1]	[4, 2]	['racemic', 'chiral']	['C1']	19	1.0	2.0	Wa-could be Diast	contains following chiral atom(s)C	NA	14.08	32.76	18.66	90.0	101.73	90.0	8427.3795772	1.4312354191	C55 H68 Cl1 N10 O14 1-,2(C4 H8 O2),Na1 1+,10(H2 O1),4(C6 H14 O2),C55 H69 Cl1 N10 O14	sodium hormaomycin 2-methylpentane-2,4-diol 1,4-dioxane decahydrate	100 K	None	None	colorless	None	None	None	None	T.Gruene, G.M.Sheldrick, B.D.Zlatopolskiy, S.I.Kozhushkov, A.de Meijere
TUHBEE	RACEMIC	NC_ND_NI	Strict definition of kryptoracemate	KRYPTORACEMIC	NO	P21	4	TRUE	FALSE	18.86	4	1	8	['C']	8	8	4	4	0	[[(2, 'SS'), (2, 'RR')]]	[2]	[4]	['racemic']	['C1']	4	4.0	8.0	RAC-2	contains following chiral atom(s)C	NA	15.517	12.726	16.627	90.0	97.309	90.0	3256.64401552	1.31494003118	C19 H18 N2 O3	3-((3R*,4S*)-2,2-Dimethyl-3-nitro-3,4-dihydro-2H-chromen-4-yl)-1H-indole	at 200 K	None	212-214 deg.C	colorless	None	None	None	None	P.M.Habib, V.Kavala, B.R.Raju, Chun-Wei Kuo, Wen-Chang Huang, Ching-Fa Yao
TUHJEN	RACEMIC	NC_ND_NI	Strict definition of kryptoracemate	KRYPTORACEMIC	NO	P1	1	TRUE	FALSE	6.86	2	1	6	['C']	6	2	3	3	0	[[(1, 'RRR'), (1, 'SSS')]]	[2]	[2]	['racemic']	['C1']	2	2.0	2.0	RAC-1	contains following chiral atom(s)C	NA	8.1273	13.0671	13.8066	75.722	80.052	74.887	1362.57771839	1.54403597947	C29 H22 Br1 F1 N6 O3 S1	4'-(4-Bromophenyl)-3''-((1-(4-fluorophenyl)-1H-1,2,3-triazol-4-yl)methyl)-1'-methyl-2''H,4''H-dispiro[indole-3,2'-pyrrolidine-3',5''-[1,3]thiazolidine]-2,2'',4''(1H)-trione	293 K	None	252 deg.C	colorless	None	None	None	None	Jayant Sindhu, Harjinder Singh, J.Khurana
TUMWIH	RACEMIC	NC_ND_NI	Strict definition of kryptoracemate	KRYPTORACEMIC	NO	P21	4	TRUE	FALSE	5.1	2	1	2	['C']	2	2	1	1	0	[[(1, 'S'), (1, 'R')]]	[2]	[2]	['racemic']	['C1']	2	2.0	4.0	RAC-1	contains following chiral atom(s)C	NA	8.756	25.757	8.628	90.0	99.15	90.0	1921.09786039	1.33619035041	C20 H22 N2 O4 S1	(dl)-2-Benzyl-4-ethoxycarbonyl-5-(p-methylphenyl)-3H,5H,6H-1,2,6-thiadiazine 1,1-dioxide	None	None	None	None	None	None	None	Coordinates for S1 and S1' are missing and have been calculated	Hyun-So Shin, Euisung Kim, Hyun Song, Chai-Ho Lee
TUWCIX	RACEMIC	NC_ND_NI	Strict definition of kryptoracemate + achiral molecule	KRYPTORACEMIC	NO	P21	4	TRUE	FALSE	3.92	2	1	4	['C']	4	4	2	2	0	[[(1, 'SS'), (1, 'RR')]]	[2]	[2]	['racemic']	['C1']	3	2.0	4.0	RAC-1	contains following chiral atom(s)C	NA	11.388	18.375	13.083	90.0	112.227	90.0	2534.24652271	1.26771908619	C23 H30 N2 O3 S2,0.5(C4 H10 O1)	2-Methyl-N-(1-(p-tolylsulfonyl)-4-(1-phenylvinyl)pyrrolidin-3-yl)propane-2-sulfinamide diethyl ether solvate	at 150 K	None	None	colorless	None	None	None	None	I.R.Cooper, R.Grigg, M.J.Hardie, W.S.MacLachlan, V.Sridharan, W.A.Thomas
TUYFOJ01	RACEMIC	NC_ND_NI	Strict definition of kryptoracemate	KRYPTORACEMIC	NO	P212121	19	TRUE	FALSE	6.91	2	1	4	['C']	4	4	2	2	0	[[(1, 'SS'), (1, 'RR')]]	[2]	[2]	['racemic']	['C1']	2	2.0	8.0	RAC-1	contains following chiral atom(s)C	NA	7.0524	17.7693	22.6194	90.0	90.0	90.0	2834.57751033	1.23441817284	C15 H21 N1 O1 S1	(R*,R*)-1-(2-(hydroxy(phenyl)methyl)azetidin-1-yl)-2,2-dimethylpropane-1-thione	110 K	None	None	colorless	None	None	chloroform/pentane	None	P.J.Rayner, J.C.Smith, C.Denneval, P.O'Brien, P.A.Clarke, R.A.J.Horan
UBONOQ	RACEMIC	NC_ND_I	Contains also at least an other enantiomer in enantiopure proportion + achiral molecule	KRYPTORACEMIC	NO	P1	1	TRUE	FALSE	4.86	3	2	4	['C']	4	4	3	1	0	[[(1, 'S'), (1, 'R')], [(1, 'RR')]]	[2, 1]	[2, 1]	['racemic', 'chiral']	['C1']	4	1.0	1.0	W1_enantiopure AU	contains following chiral atom(s)C	NA	8.566	10.959	12.578	78.555	77.856	69.045	1068.1293653	1.33037380492	C20 H16 O8 2-,C10 H10 N2 2+,2(C8 H9 Cl1 O1)	4,4'-bipyridinium 2,3-bis((4-methylbenzoyl)oxy)succinate 1-(4-chlorophenyl)ethanol solvate	at 150 K	None	None	colorless	None	None	None	None	K.Kodama, E.Sekine, T.Hirose
UCIPIG	RACEMIC	NC_ND_NI	Strict definition of kryptoracemate	KRYPTORACEMIC	NO	P1	1	TRUE	FALSE	6.72	4	1	8	['C']	8	8	4	4	0	[[(2, 'SS'), (2, 'RR')]]	[2]	[4]	['racemic']	['C1']	4	4.0	4.0	RAC-2	contains following chiral atom(s)C	NA	8.371	12.564	13.862	86.99	81.07	89.91	1438.2207894	1.81552888637	C17 H15 Br2 N1	cis-7-Bromo-4-(4-bromophenyl)-1,2,3,3a,4,8b-hexahydrocyclopent(b)indole	at 93.2 K	None	151-153deg.C	colorless	None	None	n-hexane	None	O.Miyata, N.Takeda, Y.Kimura, Y.Takemoto, N.Tohnai, M.Miyata, T.Naito
UFAZUZ	RACEMIC	NC_ND_NI	Strict definition of kryptoracemate	KRYPTORACEMIC	NO	P21	4	TRUE	FALSE	4.18	2	1	6	['C']	6	6	3	3	0	[[(1, 'RRR'), (1, 'SSS')]]	[2]	[2]	['racemic']	['C1']	2	2.0	4.0	RAC-1	contains following chiral atom(s)C	NA	13.366	8.761	13.584	90.0	94.59	90.0	1585.57842885	1.43771976854	C15 H16 Cl2 N2 O3	1-methyl-2-oxooctahydro-1H-benzimidazol-4-yl 2,4-dichlorobenzoate	100 K	None	None	colorless	None	None	chloroform	None	A.-D.Manick, S.Aubert, B.Yalcouye, T.Prang, F.Berhal, G.Prestat
UGOTOA	RACEMIC	NC_ND_NI	Strict definition of kryptoracemate	KRYPTORACEMIC	NO	P212121	19	TRUE	FALSE	4.11	2	1	12	['C']	12	8	6	6	0	[[(1, 'SSRRRR'), (1, 'RRSSSS')]]	[2]	[2]	['racemic']	['C2']	2	2.0	8.0	RAC-1	contains following chiral atom(s)C	NA	13.0545	13.7865	23.033	90.0	90.0	90.0	4145.38408127	1.25145639277	C28 H26 N2	6,9,14b,14e-Tetramethyl-7a,7b,14b,14c,14d,14e-hexahydrocarbazolo[4',3':3,4]cyclobuta[1,2-c]carbazole	at 100 K	None	202-204 deg.C	colorless	None	None	None	None	R.B.Bedford, C.P.Butts, M.F.Haddow, R.Osborne, R.F.Sankey
UJEWUD	RACEMIC	NC_ND_NI	Strict definition of kryptoracemate	KRYPTORACEMIC	NO	P1	1	TRUE	FALSE	8.86	2	1	4	['C']	4	4	2	2	0	[[(1, 'SR'), (1, 'RS')]]	[2]	[2]	['racemic']	['C1']	2	2.0	2.0	RAC-1	contains following chiral atom(s)C	NA	6.7078	10.2494	11.6279	89.158	88.366	84.902	795.88331408	1.33287242238	C17 H21 N1 O3 S1	2-Methylene-3-((4-methylphenyl)sulfonyl)-3-azabicyclo[4.3.1]decan-10-one	173 K	None	None	colorless	None	None	None	None	C.F.Heinrich, I.Fabre, L.Miesch
UKADUH	RACEMIC	NC_ND_NI	Strict definition of kryptoracemate	KRYPTORACEMIC	NO	P21	4	TRUE	FALSE	14.89	2	1	2	['C']	2	2	1	1	0	[[(1, 'S'), (1, 'R')]]	[2]	[2]	['racemic']	['C1']	2	2.0	4.0	RAC-1	contains following chiral atom(s)C	NA	5.622	8.232	45.17	90.0	90.683	90.0	2090.33280403	1.14874620537	C25 H31 N1 O1	(Z)-3-Decylidene-1,4-diphenylazetidin-2-one	150 K	None	89 deg.C	colorless	None	None	None	None	M.Hussein, A.N.El Dine, F.Fares, V.Dorcet, Ali Hachem, Rene Gree
ULIMIM	SCALEMIC	NC_ND_I	Unbalanced Kryptoracemate + achiral molecule	KRYPTORACEMIC	NO	P212121	19	TRUE	FALSE	5.56	3	1	6	['C']	6	6	3	3	0	[[(1, 'SR'), (2, 'RS')]]	[2]	[3]	['scalemic']	['C1']	6	3.0	12.0	scal-3-attention could contain stereoisomer	contains following chiral atom(s)C	NA	7.8338	27.8759	29.3202	90.0	90.0	90.0	6402.77596416	1.31170177782	C22 H28 F2 N1 O2 1+,C1 H1 O2 1-	cis-2,5-bis(2-Fluoro-5-methoxyphenethyl)pyrrolidinium formate	at 90 K	None	None	colorless	None	None	None	None	P.R.Ponugoti, N.R.Penthala, L.P.Dwoskin, S.Parkin, P.A.Crooks
UMEWUG	RACEMIC	NC_ND_NI	Strict definition of kryptoracemate	KRYPTORACEMIC	NO	P21	4	TRUE	FALSE	6.34	2	1	8	['C']	8	6	4	4	0	[[(1, 'RSRS'), (1, 'SRSR')]]	[2]	[2]	['racemic']	['C1']	2	2.0	4.0	RAC-1	contains following chiral atom(s)C	NA	15.5046	5.9276	17.2013	90.0	99.733	90.0	1558.13176145	1.41645190302	C14 H15 F3 N2 O4	endo-Methyl (2S*,3R*,4S*,5R*)-2-methyl-3-nitro-4-phenyl-5-(trifluoromethyl)prolinate	200 K	None	128-130 deg.C	colorless	None	None	None	None	A.Ponce, I.Alonso, J.Adrio, J.C.Carretero
UMISIT	RACEMIC	NC_ND_NI	Strict definition of kryptoracemate	KRYPTORACEMIC	NO	P21	4	TRUE	FALSE	6.28	2	1	2	['C']	2	2	1	1	0	[[(1, 'S'), (1, 'R')]]	[2]	[2]	['racemic']	['C1']	2	2.0	4.0	RAC-1	contains following chiral atom(s)C	NA	8.0218	14.6605	18.8312	90.0	96.776	90.0	2199.14783233	1.26993874262	C22 H24 N6 O3	(4-(1H-Benzotriazol-1-yl(2-methoxyphenyl)methyl)-1H-1,2,3-triazol-1-yl)methyl pivalate	at 293 K	None	None	colorless	None	None	None	None	Wuming Yan, Qiaoyi Wang, Yunfeng Chen, J.L.Petersen, Xiaodong Shi
UMULOE	RACEMIC	NC_ND_NI	Strict definition of kryptoracemate	KRYPTORACEMIC	NO	P212121	19	TRUE	FALSE	6.06	2	1	4	['C']	4	2	2	2	0	[[(1, 'SR'), (1, 'RS')]]	[2]	[2]	['racemic']	['C1']	2	2.0	8.0	RAC-1	contains following chiral atom(s)C	NA	12.7197	14.9537	19.9989	90.0	90.0	90.0	3803.92233056	1.33202894674	C25 H19 N1 O3	18-Ethyl-20-phenyl-2,17,21-trioxa-19-azapentacyclo-[16.2.1.03,16.04,9.010,15]henicosa-3,5,7,9,11,13,15,19-octaene	at 293 K	None	None	yellow	None	None	None	None	Lei Wang, Yu-Cheng Huang, Yang Liu, Hoong-Kun Fun, Yan Zhang, Jian-Hua Xu
USAGIF	RACEMIC	NC_ND_NI	Strict definition of kryptoracemate	KRYPTORACEMIC	NO	P212121	19	TRUE	FALSE	4.08	2	1	6	['C']	6	6	3	3	0	[[(1, 'SRR'), (1, 'RSS')]]	[2]	[2]	['racemic']	['C1']	2	2.0	8.0	RAC-1	contains following chiral atom(s)C	NA	7.106	13.373	25.901	90.0	90.0	90.0	2461.33416274	1.6037630525	C12 H13 Br1 N2 O2	4-(2-Bromophenyl)hexahydrofuro[2,3-d]pyrimidin-2(1H)-one	at 150 K	None	None	colorless	None	None	None	None	R.N.Bhattacharya, P.Kundu, G.Maiti
USARUC	RACEMIC	NC_ND_NI	Strict definition of kryptoracemate	KRYPTORACEMIC	NO	P21	4	TRUE	FALSE	3.16	4	1	8	['P']	0	0	4	4	0	[[(2, 'SR'), (2, 'RS')]]	[2]	[4]	['racemic']	['C1']	4	4.0	8.0	RAC-2	contains following chiral atom(s)P	NA	9.6827	22.3776	16.0124	90.0	91.846	90.0	3467.69557872	1.6110317576	C10 H15 Cl3 N5 O1 P3	2,2,4-Trichloro-7-methyl-4-phenoxy-1,3,5,7,11-penta-aza-2Î»5,4Î»5,6Î»5-triphosphaspiro[5.5]undeca-1,3,5-triene	at 120 K	None	None	colorless	None	None	None	None	S.Besli, S.J.Coles, D.B.Davies, A.Kilic, E.Okutan, R.A.Shaw, E.T.Ecik, G.Y.Ciftci
UTEYEZ	RACEMIC	NC_ND_NI	Strict definition of kryptoracemate	KRYPTORACEMIC	NO	P21	4	TRUE	FALSE	5.07	2	1	4	['C']	4	4	2	2	0	[[(1, 'SR'), (1, 'RS')]]	[2]	[2]	['racemic']	['C1']	2	2.0	4.0	RAC-1	contains following chiral atom(s)C	NA	8.106	15.762	16.823	90.0	97.437	90.0	2131.33901458	1.09893411964	C24 H36 Si1	1,1-di-isopropyl-2,3-dipropyl-2,3-dihydro-1H-naphtho[1,8-bc]siline	100 K	None	None	colorless	None	None	None	None	H.Arii, Yuto Yano, K.Nakabayashi, S.Yamaguchi, M.Yamamura, K.Mochida, T.Kawashima
UTIHEM	RACEMIC	NC_ND_NI	Strict definition of kryptoracemate	KRYPTORACEMIC	NO	P212121	19	TRUE	FALSE	7.23	2	1	2	['C']	2	2	1	1	0	[[(1, 'S'), (1, 'R')]]	[2]	[2]	['racemic']	['C1']	2	2.0	8.0	RAC-1	contains following chiral atom(s)C	NA	12.068	13.052	26.055	90.0	90.0	90.0	4103.96307048	1.3806422606	C22 H19 F1 N2 O2 S2	N-(4-fluorophenyl)-3-((4-methylphenyl)sulfonyl)-5-phenyl-1,3-thiazolidin-2-imine	273 K	None	None	None	None	None	None	None	A.Bhattacharyya, C.V.Kavitha, M.K.Ghorai
UTUNIH	RACEMIC	NC_ND_I	Strict definition of kryptoracemate + achiral molecule	KRYPTORACEMIC	NO	P21	4	TRUE	FALSE	2.41	2	1	6	['C']	6	6	3	3	0	[[(1, 'SRS'), (1, 'RSR')]]	[2]	[2]	['racemic']	['C1']	4	2.0	4.0	RAC-1	contains following chiral atom(s)C	NA	10.224	13.969	12.724	90.0	98.996	90.0	1794.87639773	1.22069639572	C20 H24 N1 O1 1+,Cl1 1-	(+-)-(4aSR,5RS,12aRS)-6-Phenyl-2,3,4,4a,6,11,12,12a-octahydro-1H-dibenzo[b,f][1,4]oxazocin-12-ium chloride	at 295 K	None	None	colorless	None	None	ethyl acetate/n-hexane/methanol	None	A.Steinberg, I.Ergaz, R.A.Toscano, R.Glaser
UVOJUL	RACEMIC	NC_ND_I	Strict definition of kryptoracemate + achiral molecule	KRYPTORACEMIC	NO	C2	5	TRUE	FALSE	2.56	2	1	4	['C']	4	4	2	2	0	[[(1, 'SS'), (1, 'RR')]]	[2]	[2]	['racemic']	['C2']	6	2.0	8.0	RAC-1	contains following chiral atom(s)C	NA	21.9116	8.84942	17.2357	90.0	122.196	90.0	2828.1759859	1.76741996751	C6 H15 N2 1+,C2 H6 N1 O4 S2 1-,0.11(H2 O1)	rac-trans-2-aminocyclohexanaminium bis(methylsulfonyl)azanide hydrate	at 100 K	None	None	colorless	None	None	None	None	C.Wolper, N.Anwar, N.Gulzar, P.G.Jones, A.Blaschette
UWUGOJ	RACEMIC	NC_ND_NI	Strict definition of kryptoracemate	KRYPTORACEMIC	NO	P21	4	TRUE	FALSE	5.35	2	1	12	['C']	12	12	6	6	0	[[(1, 'RRSRRR'), (1, 'SSRSSS')]]	[2]	[2]	['racemic']	['C1']	2	2.0	4.0	RAC-1	contains following chiral atom(s)C	NA	10.521	15.212	10.858	90.0	95.771	90.0	1728.96601344	2.46519301087	C12 H18 Br6	Î·-1,2,5,6,9,10-Hexabromocyclododecane	at 273 K	None	None	None	None	None	None	None	N.Riddell, R.Becker, B.Chittim, F.Emmerling, R.Koppen, A.Lough, A.McAlees, R.McCrindle
UXOCIU	SCALEMIC	NC_ND_NI	Unbalanced Kryptoracemate	KRYPTORACEMIC	NO	P212121	19	TRUE	FALSE	5.4	3	1	12	['C']	12	12	5	7	0	[[(2, 'SSSR'), (1, 'RRRS')]]	[2]	[3]	['scalemic']	['C1']	3	3.0	12.0	scal-3-attention could contain stereoisomer	contains following chiral atom(s)C	NA	8.8081	23.1231	26.0174	90.0	90.0	90.0	5298.9788729	1.58405045524	C18 H17 Br1 N2 O5	4-Bromo-3-methyl-2,6-bis(4-nitrophenyl)tetrahydro-2H-pyran	at 150 K	None	None	None	None	None	None	None	P.V.Ramachandran, P.D.Gagare
UXUGEB	RACEMIC	NC_ND_NI	Strict definition of kryptoracemate	KRYPTORACEMIC	NO	P212121	19	TRUE	FALSE	3.72	2	1	2	['C']	2	0	1	1	0	[[(1, 'S'), (1, 'R')]]	[2]	[2]	['racemic']	['C1']	2	2.0	8.0	RAC-1	contains following chiral atom(s)C	NA	7.3227	10.9955	26.3709	90.0	90.0	90.0	2123.29910588	1.29033290136	C11 H14 N2 O2	3-t-butyl-3-hydroxy-1,3-dihydro-2H-pyrrolo[2,3-b]pyridin-2-one	150 K	None	None	colorless	None	None	diethyl ether/ethyl acetate	None	G.A.El-Hiti, K.Smith, A.S.Hegazy, A.M.Masmali, B.M.Kariuki
UYEZII	SCALEMIC	NC_ND_I	Unbalanced Kryptoracemate -contains also an other enantiomer in enantiopure proportion	KRYPTORACEMIC	NO	P21	4	TRUE	FALSE	4.68	6	2	18	['C' 'N']	15	18	8	10	0	[[(1, 'S'), (2, 'R')], [(3, 'RSSSR')]]	[2, 1]	[3, 3]	['scalemic', 'chiral']	['C1']	6	3.0	6.0	Wa-could be Diast	contains following chiral atom(s)C,N	NA	10.4121	18.574	19.07	90.0	102.635	90.0	3598.71833419	1.31938803362	C20 H25 N2 O2 1+,C8 H7 O3 1-	9-Hydroxy-6'-methoxycinchonan-1-ium hydroxy(phenyl)acetate	at 173 K	None	None	colorless	None	None	None	None	N.B.Bathori, L.R.Nassimbeni, C.L.Oliver
UYEZOO01	SCALEMIC	NC_D_I	Unbalanced Kryptoracemate -contains also an other enantiomer in enantiopure proportion	KRYPTORACEMIC	NO	P21	4	TRUE	TRUE	3.29	6	2	18	['C' 'N']	15	18	8	10	0	[[(1, 'S'), (2, 'R')], [(3, 'RSSSR')]]	[2, 1]	[3, 3]	['scalemic', 'chiral']	['C1']	6	3.0	6.0	Wa-could be Diast	contains following chiral atom(s)C,N	NA	10.4377	18.501	19.116	90.0	102.318	90.0	3606.46802824	1.31655289034	C20 H25 N2 O2 1+,C8 H7 O3 1-	9-Hydroxy-6'-methoxycinchonan-1-ium hydroxy(phenyl)acetate	at 173 K	None	None	colorless	None	None	None	Two independent mandelate ions are (R) and the third mandelate ion is partly disordered and both (R) and (S) anions. The overall mole fraction Z!R$ is 77.0%	N.B.Bathori, L.R.Nassimbeni, C.L.Oliver
UYUWOC	RACEMIC	NC_ND_NI	Strict definition of kryptoracemate	KRYPTORACEMIC	NO	P1	1	TRUE	FALSE	8.63	4	1	4	['C']	4	4	2	2	0	[[(2, 'S'), (2, 'R')]]	[2]	[4]	['racemic']	['C1']	4	4.0	4.0	RAC-2	contains following chiral atom(s)C	NA	4.287	9.32	27.001	90.0	90.0	100.268	1061.54304886	1.31855256126	C11 H14 O4	5-ethyl-6-methoxy-4,6,8,8a-tetrahydro-1H,3H-pyrano[3,4-c]pyran-1-one 5-ethylidene-6-methoxy-4,5,6,8-tetrahydro-1H,3H-pyrano[3,4-c]pyran-1-one	298 K	None	None	colorless	None	None	None	None	Chang-An Geng, Xue-Mei Zhang, Yun-Bao Ma, Xiao-Yan Huang, Ji-Jun Chen
UZAMEP	RACEMIC	NC_ND_NI	Strict definition of kryptoracemate	KRYPTORACEMIC	NO	C2	5	TRUE	FALSE	10.85	2	1	2	['C']	2	2	1	1	0	[[(1, 'S'), (1, 'R')]]	[2]	[2]	['racemic']	['C1']	2	2.0	8.0	RAC-1	contains following chiral atom(s)C	NA	22.6988	12.6725	20.0388	90.0	121.214	90.0	4929.73669873	1.18983246989	C27 H23 N1 O3 S1	2-((4-methylphenyl)sulfonyl)-4-phenyl-1,2,3,11a-tetrahydro-11H-benzo[4,5]cycloocta[1,2-c]pyrrol-11-one	93 K	None	None	colorless	None	None	None	The structure contains a large amount of void space.	Y.Yamamoto
UZEPOF	SCALEMIC	NC_ND_I	Unbalanced Kryptoracemate + achiral molecule	KRYPTORACEMIC	NO	P31	144	TRUE	FALSE	8.47	3	1	3	['P']	0	0	1	2	0	[[(2, 'S'), (1, 'R')]]	[2]	[3]	['scalemic']	['C1']	6	3.0	9.0	scal-3-attention could contain stereoisomer	contains following chiral atom(s)P	NA	16.1982	16.1982	12.4084	90.0	90.0	120.0	2819.55084466	1.34748529595	C6 H6 O3 P1 1-,C5 H9 N2 1+	3,5-Dimethyl-1H-pyrazol-2-ium hydrogen phenylphosphonate	at 123 K	None	None	colorless	None	None	None	None	U.P.Singh, S.Kashyap, R.J.Butcher, H.J.Singh, B.K.Mishra
VACFAG	RACEMIC	NC_ND_NI	Strict definition of kryptoracemate	KRYPTORACEMIC	NO	P21	4	TRUE	FALSE	7.5	4	1	16	['C']	16	16	8	8	0	[[(2, 'SRSR'), (2, 'RSRS')]]	[2]	[4]	['racemic']	['C1']	4	4.0	8.0	RAC-2	contains following chiral atom(s)C	NA	14.191	20.835	13.11	90.0	91.12	90.0	3875.48639534	1.29044077312	C20 H24 O5 S1	5-Ethoxycarbonyl-7-oxo-4-phenylsulfonylmethylbicyclo(4.4.0)dec-2-ene	None	None	None	None	None	None	None	None	J.P.Marino, J.K.Long
VAJZIQ	RACEMIC	NC_ND_NI	Strict definition of kryptoracemate	KRYPTORACEMIC	NO	P1	1	TRUE	FALSE	5.53	2	1	6	['C']	6	6	3	3	0	[[(1, 'SRR'), (1, 'RSS')]]	[2]	[2]	['racemic']	['C1']	2	2.0	2.0	RAC-1	contains following chiral atom(s)C	NA	10.3108	12.1191	12.307	62.143	66.175	89.934	1209.8562073	1.21756550178	C24 H29 N1 O5 S1	Ethyl 1-benzyl-4-((4-methylphenyl)sulfonyl)-5-oxo-3-propyl-2 -pyrrolidinecarboxylate	at 293 K	None	90-91deg.C	colorless	None	None	ethyl acetate	None	Pei-Pei Sun, Meng-Yang Chang, M.Y.Chiang, Nein-Chen Chang
VATNEL	RACEMIC	NC_ND_NI	Strict definition of kryptoracemate	KRYPTORACEMIC	NO	P21	4	TRUE	FALSE	4.79	2	1	2	['C']	2	2	1	1	0	[[(1, 'S'), (1, 'R')]]	[2]	[2]	['racemic']	['C1']	2	2.0	4.0	RAC-1	contains following chiral atom(s)C	NA	7.9209	16.5292	15.2136	90.0	95.124	90.0	1983.89794973	1.66475862755	C20 H16 Br1 Cl2 N3 O1 S1	3-(5-(4-Bromophenyl)-1-ethyl-1H-imidazol-2-yl)-2-(2,6-dichlorophenyl)-1,3-thiazolidin-4-one	at 100 K	None	None	colorless	None	None	None	None	S.G.Modha, V.P.Mehta, D.Ermolat'ev, J.Balzarini, K.Van Hecke, L.Van Meervelt, E.Van der Eycken
VAXHOT	RACEMIC	NC_ND_NI	Strict definition of kryptoracemate	KRYPTORACEMIC	NO	P212121	19	TRUE	FALSE	3.47	2	1	6	['C']	6	4	3	3	0	[[(1, 'RRR'), (1, 'SSS')]]	[2]	[2]	['racemic']	['C1']	2	2.0	8.0	RAC-1	contains following chiral atom(s)C	NA	12.6286	12.8086	20.0907	90.0	90.0	90.0	3249.76486922	1.19532161172	C21 H24 O1	(1R*,2S*)-2-phenyl-1-((R*)-1-phenyl-2-propen-1-yl)cyclohexanol	at 93 K	None	90-92 deg.C	colorless	None	None	None	None	T.Takeda, S.Yoshida, T.Nishimura, A.Tsubouchi
VEBTEE	RACEMIC	NC_ND_NI	Strict definition of kryptoracemate	KRYPTORACEMIC	NO	P21	4	TRUE	FALSE	7.49	2	1	2	['C']	2	2	1	1	0	[[(1, 'S'), (1, 'R')]]	[2]	[2]	['racemic']	['C1']	2	2.0	4.0	RAC-1	contains following chiral atom(s)C	NA	7.7562	27.266	12.095	90.0	108.455	90.0	2426.31322644	1.53686329479	C24 H21 Br1 N2 O7 S1	1-(2-bromophenyl)-3-{methyl[(4-methylphenyl)sulfonyl]amino}-3-oxopropyl 4-nitrobenzoate	296 K	None	None	colorless	None	None	None	None	Yangyong Shen, Bo Huang, Linwei Zeng, Sunliang Cui
VEBZIL	RACEMIC	NC_ND_I	Strict definition of kryptoracemate + achiral molecule	KRYPTORACEMIC	NO	P212121	19	TRUE	FALSE	5.2	2	1	8	['C' 'N']	6	8	4	4	0	[[(1, 'RSSS'), (1, 'SRRR')]]	[2]	[2]	['racemic']	['C1']	4	2.0	8.0	RAC-1	contains following chiral atom(s)C,N	NA	18.403	22.198	13.556	90.0	90.0	90.0	5537.75876746	1.25007058424	C27 H37 N2 O4 S1 1+,Cl1 1-	4-(N-(4-Methoxyphenyl)thiocarbamato)-1-(3-(4-methoxyphenyloxy)propyl)-decahydroquinoline hydrochloric acid	None	None	None	colorless	None	None	None	None	V.Gibon, S.Blesgen, G.Evrard, F.Durant
VEFDES	RACEMIC	NC_ND_I	Strict definition of kryptoracemate + achiral molecule	KRYPTORACEMIC	NO	P212121	19	TRUE	FALSE	3.42	2	1	2	['C']	2	2	1	1	0	[[(1, 'S'), (1, 'R')]]	[2]	[2]	['racemic']	['C1']	7	2.0	8.0	RAC-1	contains following chiral atom(s)C	NA	7.2737	14.6615	28.1196	90.0	90.0	90.0	2998.76841636	1.32349231885	C13 H18 N1 O3 1+,1.5(H2 O1),Cl1 1-	1-(1,3-benzodioxol-5-yl)-N,N-dimethyl-1-oxobutan-2-aminium chloride sesquihydrate	100 K	None	None	colorless	None	None	10% aqueous HCl/acetone	None	M.R.Wood, I.Bernal, R.A.Lalancette
VEFNIE	RACEMIC	NC_ND_NI	Strict definition of kryptoracemate	KRYPTORACEMIC	NO	P212121	19	TRUE	FALSE	6.44	2	1	4	['C']	4	2	2	2	0	[[(1, 'SR'), (1, 'RS')]]	[2]	[2]	['racemic']	['C1']	2	2.0	8.0	RAC-1	contains following chiral atom(s)C	NA	7.8962	12.311	30.247	90.0	90.0	90.0	2940.3144452	1.14010697077	C15 H24 O3	erythro-4,5,5-Trimethyl-3-phenoxyhexane-1,4-diol	at 293 K	None	None	white	None	None	heptane	None	S.Hayashi, K.Hirano, H.Yorimitsu, K.Oshima
VEHDEU	RACEMIC	NC_ND_NI	Strict definition of kryptoracemate	KRYPTORACEMIC	NO	P1	1	TRUE	FALSE	4.93	4	1	12	['C']	12	4	6	6	0	[[(2, 'SRR'), (2, 'RSS')]]	[2]	[4]	['racemic']	['C1']	4	4.0	4.0	RAC-2	contains following chiral atom(s)C	NA	9.2049	9.4166	16.247	94.81	97.769	90.118	1390.30308256	1.39658461985	C16 H20 O5	4a,9a-dihydroxy-8,10-dimethoxy-1,3,4,4a,9a,10-hexahydroanthracen-9(2H)-one	100 K	None	None	colorless	None	None	None	None	M.Bender, B.W.H.Turnbull, B.R.Ambler, M.J.Krische
VELVAJ	RACEMIC	NC_ND_NI	Strict definition of kryptoracemate	KRYPTORACEMIC	NO	P212121	19	TRUE	FALSE	7.4	2	1	8	['C']	8	6	4	4	0	[[(1, 'RSSR'), (1, 'SRRS')]]	[2]	[2]	['racemic']	['C1']	2	2.0	8.0	RAC-1	contains following chiral atom(s)C	NA	8.883	15.164	33.718	90.0	90.0	90.0	4541.87569702	1.26490301201	C25 H24 N2 O5	12-Methyl-9-methoxymethyl-15-(2-(2-propenyloxy)phenyl)-1,12-diazatetracyclo(7.6.0.02,7.010,14)pentadeca-2,4,6-trien-11,13-dione	None	None	147-148deg.C	colorless	None	None	None	None	R.Grigg, L.M.Duffy, M.J.Dorrity, J.F.Malone, S.Rajviroongit, M.Thornton-Pett
VESGAC	RACEMIC	NC_ND_NI	Strict definition of kryptoracemate	KRYPTORACEMIC	NO	P212121	19	TRUE	FALSE	4.11	2	1	4	['C']	4	4	2	2	0	[[(1, 'SS'), (1, 'RR')]]	[2]	[2]	['racemic']	['C1']	2	2.0	8.0	RAC-1	contains following chiral atom(s)C	NA	10.3803	12.5474	27.707	90.0	90.0	90.0	3608.71972173	1.20188167027	C21 H26 O1 S1	(8Î±,8aÎ²)-1,1,2,2-Tetramethyl-8-t-butyl-1,2,8,8a-tetrahydro-3H-pentaleno(6,1,2-cde)-1-benzothiopyran-3-one	at 153 K	None	136-145deg.C	colorless	None	None	None	None	M.Soltau, J.Kopf, P.Margaretha
VETFIK	RACEMIC	NC_ND_I	Strict definition of kryptoracemate + achiral molecule	KRYPTORACEMIC	NO	P21	4	TRUE	FALSE	5.46	2	1	12	['C']	12	8	6	6	0	[[(1, 'SRSRSS'), (1, 'RSRSRR')]]	[2]	[2]	['racemic']	['C1']	10	2.0	4.0	RAC-1	contains following chiral atom(s)C	NA	12.328	11.102	27.554	90.0	96.53	90.0	3746.72497241	1.44164647214	C24 H43 N4 O2 1+,Cl1 1-,3(C1 H1 Cl3)	1,6-bis(N-Morpholinomethyl)-2,2,7,7-tetramethyl-11-aza-12-azoniatetracyclo(4.4.0.13,10.15,8)dodecane chloride chloroform solvate	at 120 K	None	200-205deg.C	colorless	None	None	None	None	H.Zachova, R.Marek, S.Man, J.Taraba, M.Potacek
VICVOV	RACEMIC	NC_ND_NI	Strict definition of kryptoracemate	KRYPTORACEMIC	NO	P21	4	TRUE	FALSE	9.02	2	1	6	['C']	6	4	3	3	0	[[(1, 'SRS'), (1, 'RSR')]]	[2]	[2]	['racemic']	['C1']	2	2.0	4.0	RAC-1	contains following chiral atom(s)C	NA	6.2246	26.4216	8.1454	90.0	93.774	90.0	1336.71912487	1.35794422081	C15 H15 N1 O4	methyl 6-benzyl-2-hydroxy-7-oxo-6-azabicyclo[3.2.0]hept-3-ene-5-carboxylate	173 K	None	None	colorless	None	None	None	None	M.Malinowski, R.Hensienne, N.Kern, D.Tardieu, A.Bodlenner, D.Hazelard, P.Compain
VIGLEF	RACEMIC	NC_ND_NI	Strict definition of kryptoracemate	KRYPTORACEMIC	NO	I2	5	TRUE	FALSE	5.85	2	1	2	['C']	2	2	1	1	0	[[(1, 'S'), (1, 'R')]]	[2]	[2]	['racemic']	['C1']	2	2.0	8.0	RAC-1	contains following chiral atom(s)C	NA	16.7992	4.3948	29.6807	90.0	99.337	90.0	2162.2678825	2.25459644081	C10 H8 Br1 I1 O2	1-(5-bromo-7-iodo-2,3-dihydro-1-benzofuran-2-yl)ethan-1-one	150 K	None	None	colorless	None	None	None	None	J.Mikusek, J.Nugent, J.S.Ward, B.D.Schwartz, A.D.Findlay, J.S.Foot, M.G.Banwell
VILZOG	RACEMIC	NC_ND_NI	Strict definition of kryptoracemate	KRYPTORACEMIC	NO	P21	4	TRUE	FALSE	5.2	2	1	10	['C']	10	8	5	5	0	[[(1, 'SSSSS'), (1, 'RRRRR')]]	[2]	[2]	['racemic']	['C1']	2	2.0	4.0	RAC-1	contains following chiral atom(s)C	NA	11.755	11.749	11.929	90.0	116.464	90.0	1474.87326366	1.31650355991	C16 H20 O5	(1RS,4RS,5RS,6RS,7RS)-5-(Benzyloxymethyl)-4,6-dihydroxy-7-methyl-2-oxabicyclo(2.2.2)octan-3-one	at 100 K	None	123.7-124.3 deg.C	colorless	None	None	None	None	M.Helliwell, E.J.Thomas, C.Vickers
VISTUO	RACEMIC	NC_ND_NI	Strict definition of kryptoracemate	KRYPTORACEMIC	NO	P21	4	TRUE	FALSE	8.3	2	1	4	['N']	0	0	2	2	0	[[(1, 'SR'), (1, 'RS')]]	[2]	[2]	['racemic']	['C1']	2	2.0	4.0	RAC-1	contains following chiral atom(s)N	NA	12.898	14.874	17.747	90.0	103.175	90.0	3315.05437129	1.05520731546	C32 H52 Li2 N2 O3	bis(Î¼2-N-isobutylanilinato)-tris(tetrahydrofuran)-di-lithium	at 198 K	None	None	None	None	None	None	None	Chicheung Su, Jie Guang, P.Williard
VITVOM	RACEMIC	NC_ND_NI	Strict definition of kryptoracemate	KRYPTORACEMIC	NO	P1	1	TRUE	FALSE	6.44	4	1	4	['C']	4	4	2	2	0	[[(2, 'S'), (2, 'R')]]	[2]	[4]	['racemic']	['C1']	4	4.0	4.0	RAC-2	contains following chiral atom(s)C	NA	6.1471	12.7234	30.693	88.614	84.253	76.021	2317.75860376	1.397321081	C23 H25 N3 O5 S2	1-[(4-methylphenyl)sulfonyl]-2-({1-[(4-methylphenyl)sulfonyl]-1H-imidazol-4-yl}methyl)piperidin-3-one	293 K	None	None	colorless	None	None	None	None	Moumita Singha Roy, Xiaofeng Meng, K.Koda, S.Rasapalli, D.Gout, C.J.Lovely
VIWNOE	RACEMIC	NC_ND_NI	Strict definition of kryptoracemate	KRYPTORACEMIC	NO	P21	4	TRUE	FALSE	4.4	2	1	8	['C' 'P']	6	2	4	4	0	[[(1, 'SRSR'), (1, 'RSRS')]]	[2]	[2]	['racemic']	['C1']	2	2.0	4.0	RAC-1	contains following chiral atom(s)C,P	NA	12.385	6.59	13.394	90.0	98.0	90.0	1082.54135344	1.35109461534	C9 H17 O4 P1	1,2,7a-Trihydroxy-2-methylperhydro-1-phosphaindene 1-oxide	None	None	None	colorless	None	None	None	None	T.J.Bartczak, R.Yagbasan
VIWTIH	RACEMIC	NC_ND_NI	Strict definition of kryptoracemate	KRYPTORACEMIC	NO	P21	4	TRUE	FALSE	4.88	4	1	4	['C']	4	0	2	2	0	[[(2, 'S'), (2, 'R')]]	[2]	[4]	['racemic']	['C1']	4	4.0	8.0	RAC-2	contains following chiral atom(s)C	NA	10.3771	23.979	14.2225	90.0	90.878	90.0	3538.60444309	1.21402206366	C20 H21 N1 O3	5,6-dimethoxy-2,3-dimethyl-3-(2-phenylethenyl)-2,3-dihydro-1H-isoindol-1-one	100 K	None	None	colorless	None	None	None	None	R.Boobalan, R.Santhoshkumar, Chien-Hong Cheng
VOBFOK	RACEMIC	NC_ND_NI	Strict definition of kryptoracemate	KRYPTORACEMIC	NO	P212121	19	TRUE	FALSE	5.51	2	1	4	['C']	4	4	2	2	0	[[(1, 'SR'), (1, 'RS')]]	[2]	[2]	['racemic']	['C1']	2	2.0	8.0	RAC-1	contains following chiral atom(s)C	NA	7.0619	18.6559	18.929	90.0	90.0	90.0	2493.82193088	1.42902769645	C15 H12 N2 O3	2-ethyl-3a,10b-dihydro-1H-pyrrolo[3',4':4,5]furo[3,2-b]quinoline-1,3(2H)-dione	293 K	None	None	yellow	None	None	None	None	Sidong Du, Chao Pi, Ting Wan, Yangjie Wu, Xiuling Cui
VOBKEE	RACEMIC	NC_ND_NI	Strict definition of kryptoracemate	KRYPTORACEMIC	NO	P21	4	TRUE	FALSE	5.39	2	1	2	['C']	2	2	1	1	0	[[(1, 'S'), (1, 'R')]]	[2]	[2]	['racemic']	['C1']	2	2.0	4.0	RAC-1	contains following chiral atom(s)C	NA	9.0174	9.9046	14.5441	90.0	97.245	90.0	1288.61679312	1.20767090672	C16 H14 N2	2-Phenyl-1,2,3,4-tetrahydroisoquinoline-1-carbonitrile	at 296.0 K	None	None	light colorless	None	None	None	None	Gen Zhang, Yunxia Ma, Guangbin Cheng, Dabin Liu, Rui Wang
VOLDOQ	RACEMIC	NC_ND_NI	Strict definition of kryptoracemate	KRYPTORACEMIC	NO	P212121	19	TRUE	FALSE	5.88	2	1	6	['C']	6	6	3	3	0	[[(1, 'SRR'), (1, 'RSS')]]	[2]	[2]	['racemic']	['C1']	2	2.0	8.0	RAC-1	contains following chiral atom(s)C	NA	8.3461	18.8665	23.936	90.0	90.0	90.0	3769.00314708	1.35147490421	C25 H21 N1 O3	exo-5-(2-Naphthyl)-3,4,4a,5,6,12c-hexahydrochromeno[3,4-b]pyrano[2,3-d]-pyridin-7(2H)-one	at 153 K	None	None	colorless	None	None	None	None	A.A.Kudale, J.Kendall, D.O.Miller, J.L.Collins, G.J.Bodwell
VORHIW	RACEMIC	NC_ND_NI	Strict definition of kryptoracemate	KRYPTORACEMIC	NO	P21	4	TRUE	FALSE	4.4	2	1	2	['C']	2	2	1	1	0	[[(1, 'S'), (1, 'R')]]	[2]	[2]	['racemic']	['C1']	2	2.0	4.0	RAC-1	contains following chiral atom(s)C	NA	14.46	5.9673	15.122	90.0	96.839	90.0	1295.55009294	1.2986189907	C16 H15 N1 O2	3-(4-methoxyphenyl)-2-methyl-2,3-dihydro-1H-isoindol-1-one	173.2 K	None	None	colorless	None	None	None	None	Bing Jia, Yunhui Yang, Xiqing Jin, Guoliang Mao, Congyang Wang
VOWFEU	RACEMIC	NC_ND_NI	Strict definition of kryptoracemate	KRYPTORACEMIC	NO	P21	4	TRUE	FALSE	4.8	2	1	4	['C']	4	2	2	2	0	[[(1, 'SR'), (1, 'RS')]]	[2]	[2]	['racemic']	['C1']	2	2.0	4.0	RAC-1	contains following chiral atom(s)C	NA	9.783	10.917	12.7981	90.0	110.114	90.0	1283.48618089	1.20739322965	C13 H19 N3 O1	5-t-Butyl-5-methyl-2-(pyridin-2-yl)imidazolidin-4-one	at 150 K	None	None	colorless	None	None	None	None	P.Drabina, E.Horakova, Z.Ruzickova, M.Sedlak
VUMKUK	RACEMIC	NC_ND_I	Strict definition of kryptoracemate + achiral molecule	KRYPTORACEMIC	NO	P1	1	TRUE	FALSE	5.96	4	1	4	['N']	0	4	2	2	0	[[(2, 'S'), (2, 'R')]]	[2]	[4]	['racemic']	['C1']	10	4.0	4.0	RAC-2	contains following chiral atom(s)N	NA	7.1171	14.7356	17.1663	103.813	95.077	90.005	1740.96859534	1.24703690802	C19 H24 N1 O1 1+,0.5(H2 O1),Cl1 1-	11-Methoxy-6-methyl-5,6,7,8,9,14-hexahydrodibenzo[c,f]azecinium chloride hemihydrate	at 183 K	None	None	colorless	None	None	None	None	M.Schulze, F.K.U.Muller, J.M.Mason, H.Gorls, J.Lehmann, C.Enzensperger
VUTZIT01	RACEMIC	NC_ND_NI	Strict definition of kryptoracemate	KRYPTORACEMIC	NO	P41	76	TRUE	FALSE	10.8	2	1	8	['C']	8	0	4	4	0	[[(1, 'SSSS'), (1, 'RRRR')]]	[2]	[2]	['racemic']	['C1']	2	2.0	8.0	RAC-1	contains following chiral atom(s)C	NA	14.492	14.492	20.47	90.0	90.0	90.0	4299.06977008	1.14636371804	C26 H26 O2	r-1,c-5-Dimethyl-c-2,c-6-bis(phenylethynyl)bicyclo(3.3.0)octane-2,6-diol	None	None	73-75deg.C	colorless	tetragonal polymorph	None	None	None	H.Quast, J.Carlsen, H.Roschert, E.-M.Peters, K.Peters, H.G.von Schnering
WAFCAI	RACEMIC	NC_ND_NI	Strict definition of kryptoracemate	KRYPTORACEMIC	NO	P212121	19	TRUE	FALSE	5.9	2	1	10	['C']	10	10	5	5	0	[[(1, 'SRRSR'), (1, 'RSSRS')]]	[2]	[2]	['racemic']	['C1']	2	2.0	8.0	RAC-1	contains following chiral atom(s)C	NA	13.6217	17.3424	22.5267	90.0	90.0	90.0	5321.5492471	1.30198786024	C31 H27 N3 O5	4-((3aSR,4RS,7SR,8aSR,8bRS)-2-((benzo(1,3)dioxol-5-yl)methyl)-7-(benzyloxy)-2,3,3a,4,5,6,7,8,8a,8b-decahydro-1,3-dioxo-1H-pyrrolo(3,4-a)pyrrolizin-4-yl)benzonitrile	at 222 K	None	151 deg.C	colorless	None	None	None	None	K.Scharer, M.Morgenthaler, P.Seiler, F.Diederich, D.W.Banner, T.Tschopp, U.Obst-Sander
WAFVOR	RACEMIC	NC_ND_NI	Strict definition of kryptoracemate	KRYPTORACEMIC	NO	P212121	19	TRUE	FALSE	4.43	2	1	6	['C']	6	6	3	3	0	[[(1, 'RRS'), (1, 'SSR')]]	[2]	[2]	['racemic']	['C1']	2	2.0	8.0	RAC-1	contains following chiral atom(s)C	NA	8.0376	12.1437	32.747	90.0	90.0	90.0	3196.31033357	1.23190326813	C19 H24 N2 O1	(13-ethylidene-9,15-dimethyl-2,15-diazatetracyclo[10.3.1.02,10.03,8]hexadeca-3,5,7,9-tetraen-11-yl)methanol	100 K	None	None	colorless	None	None	dichloromethane	None	Zhiqiang Pan, Xu-Jie Qin, Ya-Ping Liu, Ting Wu, Xiao-Dong Luo, Chengfeng Xia
WAMNAB	RACEMIC	NC_ND_NI	Strict definition of kryptoracemate	KRYPTORACEMIC	NO	P1	1	TRUE	FALSE	13.35	4	1	16	['C']	16	12	8	8	0	[[(2, 'RSSS'), (2, 'SRRR')]]	[2]	[4]	['racemic']	['C1']	4	4.0	4.0	RAC-2	contains following chiral atom(s)C	NA	10.1141	10.1194	15.7876	90.298	102.957	98.129	1557.7343281	1.19544384881	C16 H24 O4	3-((Benzyloxy)methyl)-3-methylhept-6-ene-2,4,5-triol	at 120 K	None	None	colorless	None	None	None	None	B.Linclau, E.Cini, C.S.Oakes, S.Josse, M.Light, V.Ironmonger
WASHIJ	RACEMIC	NC_ND_NI	Strict definition of kryptoracemate	KRYPTORACEMIC	NO	P1	1	TRUE	FALSE	9.0	4	1	4	['C']	4	4	3	1	0	[[(1, 'S'), (3, 'R')]]	[2]	[4]	['racemic']	['C1']	4	4.0	4.0	RAC-2	contains following chiral atom(s)C	NA	6.6876	14.659	14.648	70.083	76.777	76.785	1296.37487515	1.14920780612	C13 H20 O3	rac-3-(2-t-Butylphenoxy)propane-1,2-diol	at 293 K	None	None	colorless	None	None	None	None	A.A.Bredikhin, Z.A.Bredikhina, V.G.Novikova, A.V.Pashagin, D.V.Zakharychev, A.T.Gubaidullin
WECYIN	RACEMIC	NC_ND_NI	Strict definition of kryptoracemate	KRYPTORACEMIC	NO	P1	1	TRUE	FALSE	5.78	2	1	2	['C']	2	0	1	1	0	[[(1, 'S'), (1, 'R')]]	[2]	[2]	['racemic']	['C1']	2	2.0	2.0	RAC-1	contains following chiral atom(s)C	NA	8.6283	10.2323	11.4766	84.168	68.788	72.628	901.480106761	1.36818516299	C20 H21 N1 O6	Methyl 10,11-dimethoxy-1,5-dioxo-2,3,4,5,7,8-hexahydro-1H-benzo(4,5)azepino(3,2,1-hi)indole-3a-carboxylate	at 173 K	None	None	colorless	None	None	None	None	Qiu Wang, A.Padwa
WEDFIW	RACEMIC	NC_ND_NI	Strict definition of kryptoracemate	KRYPTORACEMIC	NO	P21	4	TRUE	FALSE	4.0	2	1	4	['C']	4	4	2	2	0	[[(1, 'SS'), (1, 'RR')]]	[2]	[2]	['racemic']	['C1']	2	2.0	4.0	RAC-1	contains following chiral atom(s)C	NA	8.035	32.646	8.2827	90.0	116.4	90.0	1946.05927889	1.33068857587	C24 H20 Cl1 N1 O2	trans-12-(6-chloropyridin-2-yl)-9,10-dihydro-9,10-ethanoanthracene-11-carboxylic acid ethyl ester	at 293 K	None	392 K	colorless	None	None	None	None	E.Gnanamani, N.Someshwar, C.R.Ramanathan
WEPWUJ	RACEMIC	NC_ND_NI	Strict definition of kryptoracemate	KRYPTORACEMIC	NO	P1	1	TRUE	FALSE	4.52	2	1	2	['C']	2	2	1	1	0	[[(1, 'S'), (1, 'R')]]	[2]	[2]	['racemic']	['C1']	2	2.0	2.0	RAC-1	contains following chiral atom(s)C	NA	7.5215	8.648	12.975	107.13	92.87	98.24	794.396339248	1.78180639698	C14 H11 Br1 F3 N1 O4 S1	1-(Bromo(trifluoromethylsulfonyloxy)methylidene)-1,2,3,4,6,10b-hexahydropyrido(2,1-a)isoindol-6-one	None	None	91deg.C	pale yellow	None	None	None	None	A.Cousson, C.Gazeau, J.-P.Gesson, J.-C.Jacquesy, D.Rambaud, B.Renoux
WEWTUP	RACEMIC	NC_ND_NI	Strict definition of kryptoracemate	KRYPTORACEMIC	NO	P21	4	TRUE	FALSE	2.64	4	1	4	['C']	4	4	3	1	0	[[(1, 'S'), (3, 'R')]]	[2]	[4]	['racemic']	['C1']	4	4.0	8.0	RAC-2	contains following chiral atom(s)C	NA	11.0955	7.8081	19.7538	90.0	104.259	90.0	1658.64262351	1.33090770947	C9 H10 O3	(R,R,R,S)-Methyl hydroxy(phenyl)acetate	at 100 K	None	None	colorless	None	None	None	None	M.Albrecht, A.Borba, K.Le Barbu-Debus, B.Dittrich, R.Fausto, S.Grimme, A.Mahjoub, M.Nedia, U.Schmitt, L.Schrader, M.A.Suhm, A.Zehnacker-Rentien, J.Zischang
WEYTAV	RACEMIC	NC_ND_NI	Strict definition of kryptoracemate	KRYPTORACEMIC	NO	P1	1	TRUE	FALSE	6.3	6	1	6	['C']	6	6	3	3	0	[[(3, 'S'), (3, 'R')]]	[2]	[6]	['racemic']	['C1']	6	6.0	6.0	RAC-2	contains following chiral atom(s)C	NA	12.74	13.278	15.849	107.3	111.08	98.12	2293.88273958	1.25255655782	C21 H18 O1	9-(2-Hydroxy-1-phenylethyl)fluorene	at 173 K	None	None	colorless	None	None	None	Lehmler et al, Acta Cryst B,2002,58,140 suggest that this structure should probably be described in a higher-symmetry group	B.Rieger, G.Jany, M.Steimann, R.Fawzi
WIKJEF	RACEMIC	NC_ND_I	Contains also at least an other enantiomer in enantiopure proportion	KRYPTORACEMIC	NO	P21	4	TRUE	FALSE	14.87	4	2	4	['C']	4	4	1	3	0	[[(2, 'S')], [(1, 'S'), (1, 'R')]]	[1, 2]	[2, 2]	['chiral', 'racemic']	['C1']	4	2.0	4.0	RAC-1	contains following chiral atom(s)C	NA	25.543	6.5659	8.6913	90.0	93.663	90.0	1454.66427561	1.24803708275	C8 H12 N1 1+,C8 H7 O3 1-	(R,S)-1-Phenylethylammonium (S)-mandelate	at 122.0 K	None	None	colorless	None	None	None	None	H.L.de Diego
WINRIX06	RACEMIC	NC_D_I	Strict definition of kryptoracemate + achiral molecule	KRYPTORACEMIC	NO	P21	4	TRUE	TRUE	5.3	2	1	2	['C']	2	2	1	1	0	[[(1, 'S'), (1, 'R')]]	[2]	[2]	['racemic']	['C1']	4	2.0	4.0	RAC-1	contains following chiral atom(s)C	NA	11.237	17.571	13.374	90.0	94.584	90.0	2632.18703725	1.35269548948	C24 H29 N2 O3 1+,C7 H5 O3 1-	1-{2-hydroxy-3-[(naphthalen-1-yl)oxy]propyl}-4-(2-methoxyphenyl)piperazin-1-ium 2-hydroxybenzoate	100 K	None	None	colorless	None	None	None	None	R.Dandela, S.Tothadi, U.K.Marelli, A.Nangia
WINSAQ	RACEMIC	NC_ND_I	Strict definition of kryptoracemate + achiral molecule	KRYPTORACEMIC	NO	P21	4	TRUE	FALSE	6.07	2	1	2	['C']	2	2	1	1	0	[[(1, 'S'), (1, 'R')]]	[2]	[2]	['racemic']	['C1']	4	2.0	4.0	RAC-1	contains following chiral atom(s)C	NA	11.4733	17.6286	13.653	90.0	93.29	90.0	2756.88017013	1.31694696371	C24 H29 N2 O3 1+,C7 H5 O4 1-	1-{2-hydroxy-3-[(naphthalen-1-yl)oxy]propyl}-4-(2-methoxyphenyl)piperazin-1-ium 2,6-dihydroxybenzoate	293 K	None	None	colorless	None	None	None	None	R.Dandela, S.Tothadi, U.K.Marelli, A.Nangia
WINSOE	RACEMIC	NC_D_I	Strict definition of kryptoracemate + achiral molecule	KRYPTORACEMIC	NO	P21	4	TRUE	TRUE	8.32	2	1	2	['C']	2	2	1	1	0	[[(1, 'S'), (1, 'R')]]	[2]	[2]	['racemic']	['C1']	4	1.0	2.0	RAC-1	contains following chiral atom(s)C	NA	11.346	17.508	13.4	90.0	98.15	90.0	2634.96942805	1.33169705866	2(C24 H29 N2 O3 1+),C7 H5 O4 1-,C7 H5 O2 1-	1-{2-hydroxy-3-[(naphthalen-1-yl)oxy]propyl}-4-(2-methoxyphenyl)piperazin-1-ium benzoate 2,6-dihydroxybenzoate	100 K	None	None	colorless	None	None	None	None	R.Dandela, S.Tothadi, U.K.Marelli, A.Nangia
WINWAU	RACEMIC	NC_D_I	Strict definition of kryptoracemate + achiral molecule	KRYPTORACEMIC	NO	P21	4	TRUE	TRUE	9.67	2	1	2	['C']	2	2	1	1	0	[[(1, 'S'), (1, 'R')]]	[2]	[2]	['racemic']	['C1']	4	1.0	2.0	RAC-1	contains following chiral atom(s)C	NA	11.246	17.607	13.523	90.0	94.19	90.0	2670.50979047	1.34138052918	2(C24 H29 N2 O3 1+),0.52(C7 H5 O4 1-),0.6(C7 H5 O4 1-),0.88(C7 H5 O3 1-)	bis(naftopidil) 2,6-dihydroxybenzoate 2,4-dihydroxybenzoate 2-hydroxybenzoate	100 K	None	None	colorless	None	None	None	None	R.Dandela, S.Tothadi, U.K.Marelli, A.Nangia
WIWCEN	RACEMIC	NC_ND_NI	Strict definition of kryptoracemate	KRYPTORACEMIC	NO	P21	4	TRUE	FALSE	12.35	4	1	4	['C']	4	4	2	2	0	[[(2, 'S'), (2, 'R')]]	[2]	[4]	['racemic']	['C1']	4	4.0	8.0	RAC-2	contains following chiral atom(s)C	NA	9.1744	23.9422	16.3375	90.0	91.446	90.0	3587.47599746	1.28635489324	C21 H18 F1 N3 O1	4-(3-fluorophenyl)-2-methyl-N,3-diphenyl-1,2,4-oxadiazolidin-5-imine	293 K	None	None	colorless	None	None	None	None	Yuan Chen, Liuting Fuyue, Gangqiang Wang, Hang Wang, Chun Lu, Haibing Guo, C.St.Amant, Shaofa Sun, Yalan Xing
WODNAE	RACEMIC	NC_ND_NI	Strict definition of kryptoracemate	KRYPTORACEMIC	NO	P212121	19	TRUE	FALSE	11.4	2	1	2	['C']	2	2	1	1	0	[[(1, 'S'), (1, 'R')]]	[2]	[2]	['racemic']	['C1']	2	2.0	8.0	RAC-1	contains following chiral atom(s)C	NA	7.903	11.324	80.576	90.0	90.0	90.0	7211.03405747	1.10672736841	C38 H45 F1 O5	(S)-Oct-2-yl 4-((4-octyloxy-3-fluoro)benzoyloxy)tolan-4'-carboxylate	None	None	None	colorless	None	None	ethanol/chloroform	There a number of bond length discrepencies between the reported and calculated values	M.Laguerre, I.Zareba, H.Allouchi, Huu Tinh Nguyen, M.Cotrait
WOFFIJ	RACEMIC	NC_ND_NI	Strict definition of kryptoracemate + achiral molecule	KRYPTORACEMIC	NO	P21	4	TRUE	FALSE	5.93	4	1	4	['N']	0	4	2	2	0	[[(2, 'S'), (2, 'R')]]	[2]	[4]	['racemic']	['C1']	8	4.0	8.0	RAC-2	contains following chiral atom(s)N	NA	15.1728	24.9612	18.7943	90.0	91.1502	90.0	7116.55536949	1.25924855048	C39 H40 N2 O4,C3 H7 N1 O1	27,28,30-trihydroxy-5,11,17,25-tetramethyl-21-[(pyridin-4-yl)methyl]-21-azapentacyclo[21.3.1.13,7.19,13.115,19]triaconta-1(27),3(30),4,6,9(29),10,12,15(28),16,18,23,25-dodecaen-21-ium-29-olate N,N-dimethylformamide solvate	123 K	None	None	yellow	None	None	None	None	H.Takemura
WONTIC	RACEMIC	NC_D_I	Strict definition of kryptoracemate + achiral molecule	KRYPTORACEMIC	NO	P21	4	TRUE	TRUE	7.03	10	1	40	['C']	40	40	20	20	0	[[(5, 'SSSS'), (5, 'RRRR')]]	[2]	[10]	['racemic']	['C1']	28	1.0	2.0	RAC-2	contains following chiral atom(s)C	NA	18.844	35.984	22.193	90.0	92.027	90.0	15039.268421	1.19036555813	10(C19 H31 N5 O5 Si1),Cs1 1+,C24 H20 B1 1-,14(C2 H3 N1)	Cesium meso-(pentakis((D)-5'-t-butyldimethylsilyl-2',3'-di-O-isopropylidene-isoguanosine) pentakis((L)-5'-t-butyldimethylsilyl-2',3'-di-O-isopropylidene-isoguanosine)) tetraphenylborate acetonitrile solvate	at 193 K	None	234 deg.C(dec.)	colorless	None	None	None	None	Xiaodong Shi, J.C.Fettinger, Mangmang Cai, J.T.Davis
WOQLIA	RACEMIC	NC_ND_I	Strict definition of kryptoracemate + achiral molecule	KRYPTORACEMIC	NO	P1	1	TRUE	FALSE	15.26	2	1	2	['C']	2	2	1	1	0	[[(1, 'S'), (1, 'R')]]	[2]	[2]	['racemic']	['C1']	4	2.0	2.0	RAC-1	contains following chiral atom(s)C	NA	9.464	9.903	12.368	91.39	101.66	102.42	1105.88298611	1.43046403001	C23 H26 O1 P1 1+,I1 1-	{[(butan-2-yl)oxy]methyl}(triphenyl)phosphanium iodide	100 K	None	None	colorless	None	None	None	None	H.Y.Gondal, Z.M.Cheema, J.H.Zaidi, S.Yousuf, M.Iqbal Choudhary
WOWXOV	RACEMIC	NC_ND_I	Strict definition of kryptoracemate + achiral molecule	KRYPTORACEMIC	NO	P21212	18	TRUE	FALSE	6.31	2	1	2	['C']	2	2	1	1	0	[[(1, 'S'), (1, 'R')]]	[2]	[2]	['racemic']	['C1']	4	2.0	8.0	RAC-1	contains following chiral atom(s)C	NA	32.345	7.003	9.842	90.0	90.0	90.0	2229.33144847	1.28518714939	C10 H14 N1 O2 1+,Cl1 1-	(R)-3,4-Methylenedioxyamphetamine hydrochloride	at 213 K	None	None	colorless	None	None	None	None	J.Buchler, C.Maichle-Mossmer, K.-A.Kovar
WUNKUN	RACEMIC	NC_ND_NI	Strict definition of kryptoracemate	KRYPTORACEMIC	NO	P21	4	TRUE	FALSE	8.82	2	1	4	['C']	4	2	2	2	0	[[(1, 'SR'), (1, 'RS')]]	[2]	[2]	['racemic']	['C1']	2	2.0	4.0	RAC-1	contains following chiral atom(s)C	NA	9.407	19.749	12.882	90.0	98.9	90.0	2364.3885695	1.25727436372	C25 H25 N3 O3 S1	4-methyl-N'-(1-methyl-2-oxo-3-(1-phenylprop-2-en-1-yl)-2,3-dihydro-1H-indol-3-yl)benzenesulfonohydrazide	298 K	None	None	light colorless	None	None	None	None	N.A.Aslam, S.A.Babu, S.Rani, S.Mahajan, J.Solanki, M.Yasuda, Akio Baba
WUNLUN	RACEMIC	NC_ND_NI	Strict definition of kryptoracemate + achiral molecule	KRYPTORACEMIC	NO	P1	1	TRUE	FALSE	8.4	2	1	4	['C']	4	4	2	2	0	[[(1, 'SR'), (1, 'RS')]]	[2]	[2]	['racemic']	['C1']	3	2.0	2.0	RAC-1	contains following chiral atom(s)C	NA	8.4452	10.6647	11.566	82.23	89.149	77.425	1007.26026684	1.25766841293	C23 H18 O3,0.5(C6 H6)	(3R*,4S*,Z)-2-Benzylidene-3-phenylchromane-4-carboxylic acid benzene solvate	at 296 K	None	122.8-125.4 deg.C	colorless	None	None	benzene	None	M.Yoshida, M.Higuchi, K.Shishido
XAHFUH	RACEMIC	NC_ND_NI	Strict definition of kryptoracemate	KRYPTORACEMIC	NO	P21	4	TRUE	FALSE	4.3	4	1	4	['C']	4	4	2	2	0	[[(2, 'S'), (2, 'R')]]	[2]	[4]	['racemic']	['C1']	4	4.0	8.0	RAC-2	contains following chiral atom(s)C	NA	20.247	6.339	23.302	90.0	105.64	90.0	2879.97992429	1.13175266995	C16 H23 N1 O1	(1Z,8E)-5-Cyano-2,6,6,9-tetramethylcycloundeca-1,8-dien-3-one	None	None	79.4-81.1 deg.C	colorless	None	None	None	The cell parameters have been taken from the supplementary data, not the paper	K.Ohe, K.Miki, S.Yanagi, T.Tanaka, S.Sawada, S.Uemura
XALWEM	RACEMIC	NC_ND_I	Contains also at least an other enantiomer in enantiopure proportion	KRYPTORACEMIC	NO	P21	4	TRUE	FALSE	5.61	4	2	10	['C' 'N']	8	8	5	5	0	[[(2, 'SR')], [(1, 'RRS'), (1, 'SSR')]]	[1, 2]	[2, 2]	['chiral', 'racemic']	['C1']	4	2.0	4.0	RAC-1	contains following chiral atom(s)C,N	NA	11.8086	11.9425	16.9264	90.0	104.225	90.0	2313.84146346	1.34346299222	C13 H15 Cl1 N1 O1 1+,C10 H15 O4 S1 1-	(+)-4-(4-Chlorophenyl)-1-azoniabicyclo(3.2.1)octan-6-one (1R)-(-)-10-camphorsulfonate	None	None	None	None	None	None	None	None	A.P.Tamiz, M.P.Smith, I.Enyedy, J.Flippen-Anderson, Mei Zhang, K.M.Johnson, A.P.Kozikowski
XECLOH	RACEMIC	NC_ND_NI	Strict definition of kryptoracemate	KRYPTORACEMIC	NO	P21	4	TRUE	FALSE	8.23	2	1	4	['C']	4	4	2	2	0	[[(1, 'SR'), (1, 'RS')]]	[2]	[2]	['racemic']	['C1']	2	2.0	4.0	RAC-1	contains following chiral atom(s)C	NA	4.5653	53.386	5.3578	90.0	101.451	90.0	1279.82711747	1.45972766992	C12 H15 N3 O5	cis-Methyl 2-(4-(((methoxycarbonyl)oxy)methyl)cyclopent-2-en-1-yl)-2H-1,2,4-triazole-3-carboxylate	at 173 K	None	None	colorless	None	None	None	None	Gwang-il An, Hakjune Rhee
XEDTEF	RACEMIC	NC_ND_NI	Strict definition of kryptoracemate	KRYPTORACEMIC	NO	P21	4	TRUE	FALSE	4.6	2	1	16	['C']	16	16	8	8	0	[[(1, 'RSRRSSRS'), (1, 'SRSSRRSR')]]	[2]	[2]	['racemic']	['C1']	2	2.0	4.0	RAC-1	contains following chiral atom(s)C	NA	8.769	12.042	19.184	90.0	102.99	90.0	1973.91880316	1.32733312671	C21 H30 O7	(Pentacyclo(5.4.0.02,6.03,10.05,9)undecane-8-one)-11-spiro-2'-(1,3,6,9,12,15-hexaoxacyheptadecane)	None	None	117-118deg.C	colorless	None	None	methanol	None	W.H.Watson, S.G.Bodige, A.P.Marchand, Hyun-Soon Chong
XEFNAX	RACEMIC	NC_ND_NI	Strict definition of kryptoracemate	KRYPTORACEMIC	NO	P1	1	TRUE	FALSE	4.13	2	1	6	['C']	6	6	3	3	0	[[(1, 'SRS'), (1, 'RSR')]]	[2]	[2]	['racemic']	['C1']	2	2.0	2.0	RAC-1	contains following chiral atom(s)C	NA	6.636	9.761	10.675	100.74	95.28	104.55	650.516657863	1.31350942108	C15 H15 N1 O3	Methyl 3-oxo-2Î±-phenyl-8-azabicyclo(3.2.1)oct-6-ene-8-carboxylate	None	None	None	colorless	None	None	dichloromethane/hexane	None	J.-L.Paparin, C.Crevisy, L.Toupet, R.Gree
XELNAG	RACEMIC	NC_ND_I	Strict definition of kryptoracemate + achiral molecule	KRYPTORACEMIC	NO	P21	4	TRUE	FALSE	6.83	4	1	8	['C']	8	8	4	4	0	[[(2, 'SS'), (2, 'RR')]]	[2]	[4]	['racemic']	['C2']	12	4.0	8.0	RAC-2	contains following chiral atom(s)C	NA	12.3892	40.276	12.9956	90.0	90.798	90.0	6484.01196464	1.16079473929	C28 H30 B1 N2 O2 1-,C4 H10 O2,K1 1+	potassium [2,3-dimethylbutane-2,3-diolato][4,4'-diphenyl-1,1',2,2'-tetrahydro-2,2'-bipyridinato]borate 1,2-dimethoxyethane solvate	175 K	None	None	yellow	None	None	None	None	L.Zhang, L.Jiao
XEPHUX	RACEMIC	NC_ND_NI	Strict definition of kryptoracemate	KRYPTORACEMIC	NO	P1	1	TRUE	FALSE	4.18	2	1	4	['C']	4	0	2	2	0	[[(1, 'SR'), (1, 'RS')]]	[2]	[2]	['racemic']	['C1']	2	2.0	2.0	RAC-1	contains following chiral atom(s)C	NA	9.923	9.993	12.909	96.07	109.69	115.18	1043.04333009	1.4658162025	C22 H18 F6 O4	cis-Ethyl (2,6-diphenyl-2,6-bis(trifluoromethyl)-1,3-dioxan-4-ylidene)acetate	at 173 K	None	None	colorless	None	None	None	None	Lihui Sun, Tong Wang, Song Ye
XEQBED	RACEMIC	NC_ND_NI	Strict definition of kryptoracemate	KRYPTORACEMIC	NO	P1	1	TRUE	FALSE	16.09	4	1	8	['C']	8	4	4	4	0	[[(2, 'SR'), (2, 'RS')]]	[2]	[4]	['racemic']	['C1']	4	4.0	4.0	RAC-2	contains following chiral atom(s)C	NA	6.1157	7.6877	35.725	88.193	85.251	82.371	1658.6933265	1.21493699026	C21 H21 N1 O1	1,2-diphenyl-1-(pyridin-4-yl)butan-1-ol	100 K	None	None	colorless	None	None	None	None	Ngiap-Kie Lim, P.Weiss, B.X.Li, C.H.McCulley, S.R.Hare, B.L.Bensema, T.A.Palazzo, D.J.Tantillo, Haiming Zhang, F.Gosselin
XERTUM	RACEMIC	NC_ND_NI	Strict definition of kryptoracemate	KRYPTORACEMIC	NO	P212121	19	TRUE	FALSE	4.51	2	1	4	['C']	4	4	2	2	0	[[(1, 'SR'), (1, 'RS')]]	[2]	[2]	['racemic']	['C1']	2	2.0	8.0	RAC-1	contains following chiral atom(s)C	NA	10.2776	11.4356	27.885	90.0	90.0	90.0	3277.33862159	1.30037158735	C21 H17 Cl1 O1	1-[2-(2-chlorophenyl)-2,3-dihydro-1H-phenalen-1-yl]ethan-1-one	296 K	None	None	colorless	None	None	None	None	Guiping Qin, Yong Wang, Hanmin Huang
XESYEC01	RACEMIC	NC_ND_NI	Strict definition of kryptoracemate	KRYPTORACEMIC	NO	P21212	18	TRUE	FALSE	7.44	2	1	4	['C']	4	0	2	2	0	[[(1, 'SS'), (1, 'RR')]]	[2]	[2]	['racemic']	['C2']	2	1.0	4.0	RAC-1	contains following chiral atom(s)C	NA	11.6697	12.3536	17.486	90.0	90.0	90.0	2520.83082432	2.48510098694	C27 H30 N6 O2	3a,3a'-methylenebis(5-methyl-2-phenyl-2,3a,4,5,6,7-hexahydro-3H-pyrazolo[4,3-c]pyridin-3-one)	296 K	None	None	colorless	orthorhombic P21212 polymorph	None	None	None	A.T.Gubaidullin, V.N.Nabiullin, S.V.Kharlamov, B.I.Buzykin
XEYLUK	SCALEMIC	NC_ND_NI	Unbalanced Kryptoracemate	KRYPTORACEMIC	NO	P21212	18	TRUE	FALSE	5.43	3	1	6	['C']	6	6	4	2	0	[[(1, 'SS'), (2, 'RR')]]	[2]	[3]	['scalemic']	['C1']	3	2.0	8.0	scal-3-attention could contain stereoisomer	contains following chiral atom(s)C	NA	14.2242	24.136	11.8407	90.0	90.0	90.0	4065.09336851	1.79628566177	C26 H22 O2	1,1'-(1,1'-Binaphthalene-2,2'-diyl)bis(prop-2-en-1-ol)	at 296 K	None	None	colorless	None	None	None	None	Long-Sheng Zheng, Ke-Zhi Jiang, Yuan Deng, Xing-Feng Bai, Guang Gao, Feng-Lei Gu, Li-Wen Xu
XEYWOQ	RACEMIC	NC_ND_NI	Strict definition of kryptoracemate	KRYPTORACEMIC	NO	P21	4	TRUE	FALSE	6.98	2	1	2	['C']	2	0	1	1	0	[[(1, 'S'), (1, 'R')]]	[2]	[2]	['racemic']	['C1']	2	2.0	4.0	RAC-1	contains following chiral atom(s)C	NA	10.2	21.427	12.408	90.0	101.29	90.0	2659.35824964	1.31231799455	C32 H22 Cl2 O3	1,3-bis(4-chlorophenyl)-5-oxo-2-(2-phenylethenyl)cyclopent-2-en-1-yl benzoate	293.1 K	None	None	white	None	None	None	None	Xiangwen Kong, Jinshuai Song, Jian Liu, Miao Meng, Shuang Yang, Min Zeng, Xinyue Zhan, Chunsen Li, Xinqiang Fang
XICBUG	RACEMIC	NC_ND_NI	Strict definition of kryptoracemate	KRYPTORACEMIC	NO	P1	1	TRUE	FALSE	8.18	4	1	4	['C']	4	4	2	2	0	[[(2, 'S'), (2, 'R')]]	[2]	[4]	['racemic']	['C1']	4	4.0	4.0	RAC-2	contains following chiral atom(s)C	NA	11.5061	13.3836	18.888	70.061	78.839	89.888	2676.07619483	1.15599244586	C29 H43 N1 O2 Si1	syn-4-hydroxy-N,N-diisopropyl-5-triethylsilyl-2-[2.2]paracyclophanecarboxamide	at 143 K	None	107-108deg.C	colorless	None	None	diethyl ether/hexane	None	T.Focken, H.Hopf, V.Snieckus, I.Dix, P.G.Jones
XIRZED	RACEMIC	NC_ND_NI	Strict definition of kryptoracemate	KRYPTORACEMIC	NO	P21	4	TRUE	FALSE	4.83	2	1	2	['C']	2	0	1	1	0	[[(1, 'S'), (1, 'R')]]	[2]	[2]	['racemic']	['C1']	2	2.0	4.0	RAC-1	contains following chiral atom(s)C	NA	10.812	8.533	19.789	90.0	96.85	90.0	1812.67704143	1.20713780968	C23 H23 N1 O1	Spiro(2-ethoxy-4-phenylcyclopenta-2,4-diene-1,4'-N-ethyl-1',4'-dihydroquinoline)	at 223 K	None	None	light yellow	None	None	None	None	I.Gottker-Schnetmann, R.Aumann, O.Kataeva, C.Holst, R.Frohlich
XISRIA	RACEMIC	NC_ND_I	Contains also at least an other enantiomer in enantiopure proportion + achiral molecule	KRYPTORACEMIC	NO	P21	4	TRUE	FALSE	5.87	4	2	6	['C' 'P']	4	4	4	2	0	[[(1, 'SS'), (1, 'RR')], [(2, 'R')]]	[2, 1]	[2, 2]	['racemic', 'chiral']	['C1']	6	2.0	4.0	Wa-could be Diast	contains following chiral atom(s)C,P	NA	7.3857	25.4539	9.5109	90.0	93.872	90.0	1783.9191089	1.37521330032	C8 H12 N1 1+,C9 H10 O5 P1 1-,H2 O1	(R)-1-phenylethylammonium rac-1-phenyl-2-carboxyethylphosphonate monohydrate	at 120 K	None	None	None	None	None	None	None	S.Gardner, M.Motevalli, K.Shastri, A.C.Sullivan, P.B.Wyatt
XOCWES	RACEMIC	NC_ND_NI	Strict definition of kryptoracemate	KRYPTORACEMIC	NO	P212121	19	TRUE	FALSE	3.96	2	1	2	['C']	2	0	1	1	0	[[(1, 'S'), (1, 'R')]]	[2]	[2]	['racemic']	['C1']	2	2.0	8.0	RAC-1	contains following chiral atom(s)C	NA	10.886	11.995	23.999	90.0	90.0	90.0	3133.73110243	1.30705509757	C18 H16 N2 O3	N-(2-Hydroxyphenyl)-5-oxo-2,3-dihydro-1H-pyrrolo[2,1-a]isoindole-9b(5H)-carboxamide	at 293 K	None	None	colorless	None	None	None	None	A.Salcedo, L.Neuville, Jieping Zhu
XOLDOS	RACEMIC	NC_ND_NI	Strict definition of kryptoracemate	KRYPTORACEMIC	NO	P212121	19	TRUE	FALSE	6.0	4	1	12	['C']	12	8	6	6	0	[[(2, 'SRS'), (2, 'RSR')]]	[2]	[4]	['racemic']	['C1']	4	4.0	16.0	RAC-2	contains following chiral atom(s)C	NA	9.8353	17.4256	31.038	90.0	90.0	90.0	5319.47878222	1.33527037746	C13 H17 N1 O3 S1	cis-4-Methyl-N-(5-methyl-6-oxabicyclo[3.1.0]hex-2-yl)benzenesulfonamide	at 110 K	None	None	colorless	None	None	None	None	S.C.Coote, P.O'Brien, A.C.Whitwood
XONWUS	RACEMIC	NC_ND_NI	Strict definition of kryptoracemate	KRYPTORACEMIC	NO	P1	1	TRUE	FALSE	5.13	2	1	2	['C']	2	0	1	1	0	[[(1, 'S'), (1, 'R')]]	[2]	[2]	['racemic']	['C1']	2	2.0	2.0	RAC-1	contains following chiral atom(s)C	NA	8.073	9.733	12.997	78.301	76.017	83.853	968.570455662	1.26702386541	C22 H27 N1 O2 S1	3-(n-Butyl)-2-methylene-3-phenyl-1-(p-tosyl)pyrrolidine	at 293 K	None	None	yellow	None	None	None	None	Shengming Ma, Wenzhong Gao
XOQGAM	RACEMIC	NC_ND_NI	Strict definition of kryptoracemate	KRYPTORACEMIC	NO	P212121	19	TRUE	FALSE	8.37	2	1	2	['C']	2	2	1	1	0	[[(1, 'S'), (1, 'R')]]	[2]	[2]	['racemic']	['C1']	2	2.0	8.0	RAC-1	contains following chiral atom(s)C	NA	10.892	11.031	36.066	90.0	90.0	90.0	4333.31734903	1.21559914983	C26 H28 N4	1-(Adamant-1-yl)-3,4-diphenyl-5-cyanomethyl-4,5-dihydro-1H-1,2,4-triazole	at 153 K	None	None	None	None	None	acetonitrile	None	N.I.Korotkikh, G.F.Rayenko, T.M.Pekhtereva, O.P.Shvaika, A.H.Cowley, J.N.Jones
XOXNAB	RACEMIC	NC_ND_NI	Strict definition of kryptoracemate	KRYPTORACEMIC	NO	P21	4	TRUE	FALSE	10.72	2	1	6	['C']	6	2	3	3	0	[[(1, 'RRS'), (1, 'SSR')]]	[2]	[2]	['racemic']	['C1']	2	2.0	4.0	RAC-1	contains following chiral atom(s)C	NA	12.0486	19.463	13.053	90.0	106.16	90.0	2940.00962265	1.29368420921	C33 H33 F1 N2 O6	ethyl 4'-benzoyl-1-benzyl-2'-(2-ethoxy-2-oxoethyl)-5-fluoro-1'-methyl-2-oxo-1,2-dihydrospiro[indole-3,3'-pyrrolidine]-2'-carboxylate	at 296 K	None	None	colorless	None	None	None	None	Chao-Guo Yan
XOZFIB	RACEMIC	NC_ND_NI	Strict definition of kryptoracemate	KRYPTORACEMIC	NO	P212121	19	TRUE	FALSE	4.65	2	1	4	['C']	4	2	2	2	0	[[(1, 'SR'), (1, 'RS')]]	[2]	[2]	['racemic']	['C1']	2	2.0	8.0	RAC-1	contains following chiral atom(s)C	NA	7.2228	16.0622	18.0952	90.0	90.0	90.0	2099.29758522	1.16581358782	C10 H16 O3	4-t-Butoxy-5-methyl-5-hydroxycyclopent-2-enone	at 173 K	None	81.3-82.1 deg.C	colorless	None	None	None	None	S.Caddick, S.Cheung, V.E.Doyle, L.M.Frost, M.G.Soscia, V.M.Delisser, M.R.V.Williams, Z.C.Etheridge, S.Khan, P.B.Hitchcock, G.Pairaudeau, S.Vile
XUBPUG	RACEMIC	NC_ND_NI	Strict definition of kryptoracemate	KRYPTORACEMIC	NO	P212121	19	TRUE	FALSE	4.16	2	1	2	['C']	2	2	1	1	0	[[(1, 'S'), (1, 'R')]]	[2]	[2]	['racemic']	['C1']	2	2.0	8.0	RAC-1	contains following chiral atom(s)C	NA	9.144	12.011	33.567	90.0	90.0	90.0	3686.61607913	1.39563738935	C20 H23 Br1 N2 O1	N'-[(E)-4-Bromobenzylidene]-2-(4-isobutylphenyl)propanohydrazide	at 100 K	None	None	colorless	None	None	ethanol/dmf	None	H.-K.Fun, C.K.Quah, K.V.Sujith, B.Kalluraya
XUBTEU	RACEMIC	NC_ND_NI	Strict definition of kryptoracemate	KRYPTORACEMIC	NO	P21	4	TRUE	FALSE	2.9	2	1	2	['C']	2	0	1	1	0	[[(1, 'S'), (1, 'R')]]	[2]	[2]	['racemic']	['C1']	2	2.0	4.0	RAC-1	contains following chiral atom(s)C	NA	6.2314	17.5694	15.5892	90.0	99.373	90.0	1683.94955335	1.42149410263	C17 H16 N2 O5 S1	1-((4-Methoxyphenyl)sulfonyl)-5-methyl-5-phenylimidazolidine-2,4-dione	at 173 K	None	None	colorless	None	None	ethyl acetate	None	A.Hussain, S.Hameed, H.Stoeckli-Evans
XUPMEB	RACEMIC	NC_ND_NI	Strict definition of kryptoracemate	KRYPTORACEMIC	NO	P21	4	TRUE	FALSE	5.34	2	1	4	['C']	4	4	2	2	0	[[(1, 'SS'), (1, 'RR')]]	[2]	[2]	['racemic']	['C1']	2	2.0	4.0	RAC-1	contains following chiral atom(s)C	NA	7.7042	5.8444	18.3768	90.0	97.194	90.0	820.927865267	1.30407475993	C10 H8 F1 N1	trans-2-Ethynyl-3-(4-fluorophenyl)aziridine	at 150 K	None	None	yellow	None	None	None	None	Zhi He, A.K.Yudin
XUPMUR	RACEMIC	NC_ND_NI	Strict definition of kryptoracemate	KRYPTORACEMIC	NO	P21	4	TRUE	FALSE	5.42	4	1	12	['C']	12	8	6	6	0	[[(2, 'SRS'), (2, 'RSR')]]	[2]	[4]	['racemic']	['C1']	4	4.0	8.0	RAC-2	contains following chiral atom(s)C	NA	10.9124	20.5091	14.7548	90.0	90.208	90.0	3302.15416409	1.27679630349	C21 H19 N1 O2	10-Benzyl-10-azatetracyclo[9.2.2.01,9.03,8]pentadeca-3,5,7-triene-2,13-dione	at 147 K	None	None	colorless	None	None	None	None	Hyun-Suk Yeom, Youngun Lee, Jaewon Jeong, Eunsoo So, Soojin Hwang, Ji-Eun Lee, Shim Sung Lee, Seunghoon Shin
XURDAQ	RACEMIC	NC_ND_NI	Strict definition of kryptoracemate	KRYPTORACEMIC	NO	P21	4	TRUE	FALSE	9.24	2	1	6	['C']	6	6	3	3	0	[[(1, 'RRS'), (1, 'SSR')]]	[2]	[2]	['racemic']	['C1']	2	2.0	4.0	RAC-1	contains following chiral atom(s)C	NA	12.444	7.8733	16.766	90.0	109.74	90.0	1546.12400255	1.20019740659	C19 H21 N1 O1	N,N-Dibenzyl-6-oxabicyclo[3.1.0]hexan-2-amine	at 150 K	None	None	colorless	None	None	None	None	C.W.Bond, A.J.Cresswell, S.G.Davies, A.M.Fletcher, W.Kurosawa, J.A.Lee, P.M.Roberts, A.J.Russell, A.D.Smith, J.E.Thomson
XUYQIT	RACEMIC	NC_ND_NI	Strict definition of kryptoracemate	KRYPTORACEMIC	NO	P212121	19	TRUE	FALSE	5.01	2	1	2	['C']	2	2	1	1	0	[[(1, 'S'), (1, 'R')]]	[2]	[2]	['racemic']	['C1']	2	2.0	8.0	RAC-1	contains following chiral atom(s)C	NA	11.2312	16.239	22.524	90.0	90.0	90.0	4108.00498096	1.36922715578	C26 H17 N1 O5	7-(4-methoxybenzoyl)-5H-benzo[b]naphtho[2,3-d]azepine-6,8,13(7H)-trione	296 K	None	None	yellow	None	None	None	None	Rong-Guo Shi, Xiao-Hua Wang, Ruzhang Liu, Chao-Guo Yan
YAHYIP	RACEMIC	NC_ND_NI	Strict definition of kryptoracemate	KRYPTORACEMIC	NO	P1	1	TRUE	FALSE	4.6	2	1	4	['C']	4	4	2	2	0	[[(1, 'SR'), (1, 'RS')]]	[2]	[2]	['racemic']	['C1']	2	2.0	2.0	RAC-1	contains following chiral atom(s)C	NA	5.947	10.193	17.533	96.14	99.77	107.0	987.711318616	1.24226442442	C24 H23 N3 O1	trans-6-Benzyl-3,5-diphenyl-5,6,7,8-tetrahydro-3H-(1,2,4)-oxadiazolo(4,3-c)pyrimidine	None	None	107-109deg.C	white	None	None	None	None	D.Korbonits, E.Tobias-Heja, K.Simon, G.Kramer, P.Kolonits
YAQVUK	RACEMIC	NC_ND_NI	Strict definition of kryptoracemate	KRYPTORACEMIC	NO	P21	4	TRUE	FALSE	4.5	8	1	16	['C']	16	16	8	8	0	[[(4, 'SS'), (4, 'RR')]]	[2]	[8]	['racemic']	['C1']	8	8.0	16.0	RAC-2	contains following chiral atom(s)C	NA	9.9321	22.705	19.824	90.0	98.538	90.0	4420.93359471	1.34231598341	C11 H13 N1 S2	7-(4-methylphenyl)-2,5-dithia-7-azabicyclo[2.2.1]heptane	296 K	None	None	colorless	None	None	None	None	Xia Wu, Xiao Geng, Peng Zhao, Jingjing Zhang, Xingxing Gong, Yan-dong Wu, An-xin Wu
YERGOR	RACEMIC	NC_ND_NI	Strict definition of kryptoracemate	KRYPTORACEMIC	NO	P21	4	TRUE	FALSE	6.3	2	1	10	['C']	10	8	5	5	0	[[(1, 'SRRSR'), (1, 'RSSRS')]]	[2]	[2]	['racemic']	['C1']	2	2.0	4.0	RAC-1	contains following chiral atom(s)C	NA	5.57	24.101	8.689	90.0	92.07	90.0	1165.67252672	1.25820746673	C14 H20 O2	1,8-Epoxy-tricyclo(8.4.0.02,6)tetradecan-7-one	at 125 K	None	None	colorless	None	None	None	None	M.C.McMills, Linghang Zhuang, D.L.Wright, W.Watt
YIPNUI	RACEMIC	NC_ND_NI	Strict definition of kryptoracemate + achiral molecule	KRYPTORACEMIC	NO	P21	4	TRUE	FALSE	7.34	2	1	4	['C']	4	4	2	2	0	[[(1, 'SS'), (1, 'RR')]]	[2]	[2]	['racemic']	['C1']	3	2.0	4.0	RAC-1	contains following chiral atom(s)C	NA	14.455	10.9518	16.561	90.0	95.255	90.0	2610.7238955	1.30658542069	C28 H24 F1 N3 O3,0.5(C4 H8 O2)	N-(9-(4-Fluorobenzoyl)-6-oxo-8-phenyl-1,3,4,6,7,8-hexahydro-2H-pyrido[1,2-a]pyrimidin-7-yl)benzamide ethyl acetate solvate	at 298 K	None	None	colorless	None	None	None	None	Xuebing Chen, Dandan Zhu, Xiaoying Wang, Shengjiao Yan, Jun Lin
YISTOL	RACEMIC	NC_ND_NI	Strict definition of kryptoracemate + achiral molecule	KRYPTORACEMIC	NO	P21	4	TRUE	FALSE	5.07	2	1	8	['C']	8	4	4	4	0	[[(1, 'RRSR'), (1, 'SSRS')]]	[2]	[2]	['racemic']	['C1']	4	2.0	4.0	RAC-1	contains following chiral atom(s)C	NA	9.7366	20.2854	14.394	90.0	90.097	90.0	2842.96675008	1.34967549406	C31 H31 N1 O6 S1,C1 H4 O1	Dimethyl 2-((4-methylphenyl)sulfonyl)-3,5-diphenyl-2,3,4,5-tetrahydro-1H-isoindole-3a,7a-dicarboxylate methanol solvate	at 100 K	None	None	None	None	None	None	None	Ko Hoon Kim, Sangku Lee, Junseong Lee, Min Jeong Go, Jae Nyung Kim
YIXVAD	RACEMIC	NC_ND_NI	Strict definition of kryptoracemate	KRYPTORACEMIC	NO	I2	5	TRUE	FALSE	6.4	2	1	2	['C']	2	2	1	1	0	[[(1, 'S'), (1, 'R')]]	[2]	[2]	['racemic']	['C1']	2	2.0	8.0	RAC-1	contains following chiral atom(s)C	NA	22.988	5.6407	86.265	90.0	93.523	90.0	11164.706645	0.991564437891	C53 H100 O6	1,2-dipalmitoyl-3-elaidoylglycerol	at 297 K	None	319 K	white	beta'!1$-2 polymorph	None	None	None	J.B.van Mechelen, R.Peschar, H.Schenk
YIZGEU	RACEMIC	NC_ND_NI	Strict definition of kryptoracemate + achiral molecule	KRYPTORACEMIC	NO	P1	1	TRUE	FALSE	6.84	2	1	2	['C']	2	2	1	1	0	[[(1, 'S'), (1, 'R')]]	[2]	[2]	['racemic']	['C1']	4	2.0	2.0	RAC-1	contains following chiral atom(s)C	NA	8.661	10.132	11.185	77.11	67.16	86.52	881.400403445	1.43364751361	C14 H14 N4 O2 S1,C2 H6 O1 S1	3,4-Dihydro-6-methyl-7-(methylthio)-4-phenylpyrimido(4,5-d)pyrimidine-2,5(1H,6H)-dione dimethylsulfoxide solvate	at 293 K	None	272-274 deg.C	colorless	None	None	None	None	M.Dabiri, H.Arvin-Nezhad, H.R.Khavasi, A.Bazgir
YOBNEI	RACEMIC	NC_ND_NI	Strict definition of kryptoracemate	KRYPTORACEMIC	NO	C2	5	TRUE	FALSE	4.81	2	1	4	['C']	4	4	2	2	0	[[(1, 'SS'), (1, 'RR')]]	[2]	[2]	['racemic']	['C1']	2	1.5	6.0	RAC-1	contains following chiral atom(s)C	NA	16.382	10.559	28.933	90.0	95.91	90.0	4978.15811807	0.979061228881	C22 H56 Si6	(E)-3,4-Di-t-butyl-1,1,2,2-tetrakis(trimethylsilyl)-1,2-disilacyclobutane	None	None	None	colorless	None	None	None	None	C.Krempner, H.Reinke, H.Oehme
YOFNOY	RACEMIC	NC_ND_NI	Strict definition of kryptoracemate	KRYPTORACEMIC	NO	P212121	19	TRUE	FALSE	3.39	2	1	14	['C']	14	14	7	7	0	[[(1, 'SSSRSSR'), (1, 'RRRSRRS')]]	[2]	[2]	['racemic']	['C1']	2	2.0	8.0	RAC-1	contains following chiral atom(s)C	NA	10.3113	15.9233	17.7014	90.0	90.0	90.0	2906.39150813	1.44575617329	C16 H16 N2 O5	5,14-dimethyl-17-oxa-5,14-diazapentacyclo[9.5.1.02,10.03,7.012,16]heptadec-9-ene-4,6,13,15-tetrone	200 K	None	None	colorless	None	None	None	None	T.Fallon, A.C.Willis, M.N.Paddon-Row, M.S.Sherburn
YOGVAR	RACEMIC	NC_ND_NI	Strict definition of kryptoracemate	KRYPTORACEMIC	NO	P1	1	TRUE	FALSE	4.91	2	1	2	['C']	2	0	1	1	0	[[(1, 'S'), (1, 'R')]]	[2]	[2]	['racemic']	['C1']	2	2.0	2.0	RAC-1	contains following chiral atom(s)C	NA	11.673	9.084	9.075	107.41	85.02	97.94	908.350114943	1.27425888507	C22 H20 S2	1-(Benzo(b)thiophen-2-yl)-1,3,3-trimethyl-cyclopentene(d)benzo(b)thiophene	None	None	125-127 deg.C	white	None	None	None	None	A.Banerjee, G.Biswas, S.Pain(Biswas), B.B.Maji, K.L.Ghatak, S.N.Ganguly, Y.Iitaka
YOJZIH	RACEMIC	NC_ND_NI	Strict definition of kryptoracemate	KRYPTORACEMIC	NO	P21	4	TRUE	FALSE	3.1	2	1	4	['C']	4	4	2	2	0	[[(1, 'SS'), (1, 'RR')]]	[2]	[2]	['racemic']	['C1']	2	2.0	4.0	RAC-1	contains following chiral atom(s)C	NA	11.4467	9.5194	13.1539	90.0	108.81	90.0	1356.77458915	1.26459294917	C15 H18 N2 O2	(R,R,S,S)-trans-2-(1-Methylbenzimidazol-2-yl)cyclohexanecarboxylic acid	at 200 K	None	None	colorless	None	None	None	None	F.Delval, A.Spyratou, S.Verdan, G.Bernardinelli, A.F.Williams
YOSKAU	RACEMIC	NC_ND_NI	Strict definition of kryptoracemate	KRYPTORACEMIC	NO	P21	4	TRUE	FALSE	3.46	2	1	2	['C']	2	2	1	1	0	[[(1, 'S'), (1, 'R')]]	[2]	[2]	['racemic']	['C1']	2	2.0	4.0	RAC-1	contains following chiral atom(s)C	NA	8.97246	14.38622	10.17414	90.0	100.0449	90.0	1293.14507084	1.35777895299	C13 H16 N2 O2 S1	1-methyl-3-(2-(methylsulfanyl)ethyl)-3,4-dihydro-1H-1,4-benzodiazepine-2,5-dione	at 99.9 K	None	None	colorless	None	None	water/ethanol/ethyl acetate	None	S.A.Antolak, Zhong-Ke Yao, G.M.Richoux, C.Slebodnick, P.R.Carlier
YOXREI	RACEMIC	NC_ND_NI	Strict definition of kryptoracemate	KRYPTORACEMIC	NO	P21	4	TRUE	FALSE	2.9	2	1	6	['C']	6	4	3	3	0	[[(1, 'SRR'), (1, 'RSS')]]	[2]	[2]	['racemic']	['C1']	2	2.0	4.0	RAC-1	contains following chiral atom(s)C	NA	7.8131	18.219	10.0092	90.0	110.041	90.0	1338.50458677	1.29653129152	C14 H15 N1 O4	6,7-Benzo-5-hydroxy-2-methyl-4-methoxycarbonyl-1-aza-bicyclo(3.3.0)octan-8-one	None	None	132-134deg.C	None	None	None	None	Cell length c reported as 19.0092, we calculate 10.0092	U.C.Yoon, D.U.Kim, C.W.Lee, Y.S.Choi, Y.-J.Lee, H.L.Ammon, P.S.Mariano
YUBTEW	RACEMIC	NC_ND_I	Contains also at least an other enantiomer in enantiopure proportion + achiral molecule	KRYPTORACEMIC	NO	C2	5	TRUE	FALSE	6.77	3	2	4	['C']	4	4	2	2	0	[[(1, 'S'), (1, 'R')], [(1, 'SR')]]	[2, 1]	[2, 1]	['racemic', 'chiral']	['C1']	6	1.0	4.0	W1_enantiopure AU	contains following chiral atom(s)C	NA	57.018	5.1662	9.3289	90.0	95.689	90.0	2734.44556187	1.42730933113	C8 H12 N3 O3 S1 1+,C8 H8 O3,C8 H7 O3 1-,3(H2 O1)	1-(2-(hydroxymethyl)-1,3-oxathiolan-5-yl)-2-oxo-2,3-dihydropyrimidin-4(1H)-iminium hydroxy(phenyl)acetate hydroxy(phenyl)acetic acid trihydrate	150 K	None	None	colorless	None	None	None	None	C.C.da Silva, F.T.Martins
YUDGEK	RACEMIC	NC_ND_NI	Strict definition of kryptoracemate	KRYPTORACEMIC	NO	P21	4	TRUE	FALSE	3.67	2	1	6	['C']	6	4	3	3	0	[[(1, 'SRS'), (1, 'RSR')]]	[2]	[2]	['racemic']	['C1']	2	2.0	4.0	RAC-1	contains following chiral atom(s)C	NA	11.093	11.775	14.258	90.0	99.74	90.0	1835.53592631	1.34876601523	C17 H23 Br1 Cl1 N1 O1	(1R*,2S*,3R*)-2-Bromo-3-(4-chlorophenyl)-N,N-diisopropyl-1-methylcyclopropanecarboxamide	at 293 K	None	None	colorless	None	None	None	None	J.M.Concellon, H.Rodriguez-Solla, E.G.Blanco, M.A.Villa-Garcia, N.Alvaredo, S.Garcia-Granda, M.R.Diaz
YUDLOA	RACEMIC	NC_ND_NI	Strict definition of kryptoracemate	KRYPTORACEMIC	NO	P212121	19	TRUE	FALSE	2.73	2	1	4	['C']	4	2	2	2	0	[[(1, 'SR'), (1, 'RS')]]	[2]	[2]	['racemic']	['C1']	2	2.0	8.0	RAC-1	contains following chiral atom(s)C	NA	10.69662	13.47417	21.6859	90.0	90.0	90.0	3125.54704995	1.26379720867	C18 H19 N1 O3	3-methoxy-1-(4-methoxyphenyl)-4-methyl-4-phenylazetidin-2-one	100 K	None	None	colorless	None	None	None	None	D.Bandyopadhyay
YUFVAX	RACEMIC	NC_ND_NI	Strict definition of kryptoracemate	KRYPTORACEMIC	NO	P1	1	TRUE	FALSE	4.27	2	1	10	['C']	10	4	5	5	0	[[(1, 'SSSRR'), (1, 'RRRSS')]]	[2]	[2]	['racemic']	['C1']	2	2.0	2.0	RAC-1	contains following chiral atom(s)C	NA	6.746	8.675	11.483	102.121	98.334	104.318	622.714681853	1.42783913923	C16 H18 O4	2-Oxapentacyclo[6.5.2.29,12.01,9.03,8]heptadecane-7,11,14-trione	at 110.1 K	None	None	colorless	None	None	None	None	K.Nicolaou, Lin Dong, Lujiang Deng, A.C.Talbot, D.Y.-K.Chen
YUGTOK	RACEMIC	NC_ND_I	Strict definition of kryptoracemate + achiral molecule	KRYPTORACEMIC	NO	P21	4	TRUE	FALSE	4.69	2	1	4	['C']	4	2	2	2	0	[[(1, 'SS'), (1, 'RR')]]	[2]	[2]	['racemic']	['C1']	5	2.0	4.0	RAC-1	contains following chiral atom(s)C	NA	9.6036	12.2354	18.6396	90.0	94.52	90.0	2183.4136086	1.53052711947	C20 H30 N1 S1 1+,I1 1-,0.5(C1 H1 Cl3)	4-t-Butyl-9-methyl-5a-phenyl-2,3,4,5,5a,6,7,8-octahydrothiepino[2,3-b]pyridin-9-ium iodide chloroform solvate	at 100 K	None	167-168 deg.C	yellow-brown	None	None	chloroform	None	M.Szostak, J.Aube
ZADYEL	RACEMIC	NC_ND_NI	Strict definition of kryptoracemate	KRYPTORACEMIC	NO	P212121	19	TRUE	FALSE	3.16	2	1	2	['C']	2	2	1	1	0	[[(1, 'S'), (1, 'R')]]	[2]	[2]	['racemic']	['C1']	2	2.0	8.0	RAC-1	contains following chiral atom(s)C	NA	9.2275	10.6619	17.4548	90.0	90.0	90.0	1717.25004214	1.4097659648	C9 H10 O2 S1	cis-5-Phenyl-1,2-oxathiolane-2-oxide	100 K	None	None	colorless	None	None	None	None	G.M.T.Smith, P.M.Burton, C.D.Bray
ZAGRAA	RACEMIC	NC_ND_NI	Contains also at least an other enantiomer in enantiopure proportion	KRYPTORACEMIC	NO	P21	4	TRUE	FALSE	8.4	4	2	8	['C']	8	8	3	5	0	[[(2, 'SSR')], [(1, 'S'), (1, 'R')]]	[1, 2]	[2, 2]	['chiral', 'racemic']	['C1']	4	2.0	4.0	RAC-1	contains following chiral atom(s)C	NA	13.1181	27.9193	8.8624	90.0	92.954	90.0	3241.52480695	1.22481997327	C33 H27 N1 O3,C7 H12 O1	2S'-cis-(9,10-Dihydro-9,10-ethanoanthracene-11,12-dicarboximido)-1,1-diphenylpropan-1-ol 2-methylcyclohexanone clathrate	None	None	None	None	None	None	None	None	E.Weber, C.Reutel, C.Foces-Foces, A.L.Llamas-Saiz
ZATKOW	RACEMIC	NC_ND_NI	Strict definition of kryptoracemate	KRYPTORACEMIC	NO	P21	4	TRUE	FALSE	5.32	2	1	4	['C']	4	4	2	2	0	[[(1, 'SS'), (1, 'RR')]]	[2]	[2]	['racemic']	['C1']	2	2.0	4.0	RAC-1	contains following chiral atom(s)C	NA	11.1156	10.1132	17.6109	90.0	99.356	90.0	1953.38116205	1.22898732448	C20 H27 N1 O5	1-tert-Butyl 4-ethyl 5-oxo-6-phenylazepane-1,4-dicarboxylate	at 100 K	None	None	None	None	None	None	None	S.M.Sakya, A.C.Flick, J.W.Coe, D.L.Gray, S.Liang, F.Ferri, M.Van Den Berg, K.Pouwer
ZECSEH	RACEMIC	NC_ND_NI	Strict definition of kryptoracemate	KRYPTORACEMIC	NO	P21	4	TRUE	FALSE	2.7	2	1	2	['C']	2	0	1	1	0	[[(1, 'S'), (1, 'R')]]	[2]	[2]	['racemic']	['C1']	2	2.0	4.0	RAC-1	contains following chiral atom(s)C	NA	8.0994	18.807	8.8124	90.0	95.392	90.0	1336.4127118	1.40826062079	C16 H13 N1 O2 S1	1-Phenyl-8-thia-9-azatricyclo[7.2.1.02,7]dodeca-2,4,6,10-tetraene 8,8-dioxide	at 100 K	None	None	colorless	None	None	None	None	K.Geoghegan, P.Evans, I.Rozas, I.Alkorta
ZEVKUI	RACEMIC	NC_ND_NI	Strict definition of kryptoracemate	KRYPTORACEMIC	NO	P1	1	TRUE	FALSE	7.39	4	1	12	['C']	12	12	6	6	0	[[(2, 'RRS'), (2, 'SSR')]]	[2]	[4]	['racemic']	['C1']	4	4.0	4.0	RAC-2	contains following chiral atom(s)C	NA	10.561	12.073	15.741	84.61	80.7	77.64	1931.06621069	1.31535129502	C24 H18 N2 O3	3-Nitro-2,4,6-triphenyl-3,4-dihydro-2H-pyran-5-carbonitrile	at 173 K	None	None	colorless	None	None	None	None	Xiang-Yu Chen, Li-Hui Sun, Song Ye
ZINMUE	RACEMIC	NC_ND_NI	Strict definition of kryptoracemate	KRYPTORACEMIC	NO	P21	4	TRUE	FALSE	3.3	2	1	4	['C']	4	4	2	2	0	[[(1, 'SR'), (1, 'RS')]]	[2]	[2]	['racemic']	['C1']	2	2.0	4.0	RAC-1	contains following chiral atom(s)C	NA	13.081	10.172	15.622	90.0	90.14	90.0	2078.65605238	1.12980660065	C22 H31 N1 O1 Si1	2,6-Dimethyl-N-(3-(hydroxydiphenylsilyl)propyl)piperidine	None	None	None	white	None	None	None	None	R.Tacke, G.Lambrecht, E.Mutschler, W.S.Sheldrick
ZIXSOO	RACEMIC	NC_ND_NI	Strict definition of kryptoracemate	KRYPTORACEMIC	NO	P21	4	TRUE	FALSE	4.9	2	1	6	['C']	6	6	3	3	0	[[(1, 'RRS'), (1, 'SSR')]]	[2]	[2]	['racemic']	['C1']	2	2.0	4.0	RAC-1	contains following chiral atom(s)C	NA	9.267	21.95	10.321	90.0	109.29	90.0	1981.53803743	1.19815369674	C21 H27 N1 O4	(1'S,2S,4S)-3-Benzoyl-2-t-butyl-4-((2'-oxo-1'-cyclohexyl)methyl)oxazolidin-5-one	None	None	169deg.C	None	None	None	None	None	S.G.Pyne, A.Javidan, B.W.Skelton, A.H.White
ZIZVOW	RACEMIC	NC_ND_NI	Strict definition of kryptoracemate	KRYPTORACEMIC	NO	R3	146	TRUE	FALSE	2.61	2	1	8	['C']	8	8	4	4	0	[[(1, 'RSSS'), (1, 'SRRR')]]	[2]	[2]	['racemic']	['C1']	2	2.0	18.0	RAC-1	contains following chiral atom(s)C	NA	36.4159	36.4159	6.6637	90.0	90.0	120.0	7652.93745777	1.41130085745	C17 H19 N3 O6	1-[6-(2H-1,3-benzodioxol-5-yl)-4,5-dihydroxycyclohex-2-en-1-yl]-2,4-dimethyl-1,2,4-triazolidine-3,5-dione	100.0 K	None	None	colorless	None	None	hexanes/ethyl acetate	None	T.W.Bingham, L.W.Hernandez, D.G.Olson, R.L.Svec, P.J.Hergenrother, D.Sarlah
ZONDUE	RACEMIC	NC_ND_NI	Strict definition of kryptoracemate + achiral molecule	KRYPTORACEMIC	NO	P21	4	TRUE	FALSE	4.94	2	1	2	['C']	2	0	1	1	0	[[(1, 'S'), (1, 'R')]]	[2]	[2]	['racemic']	['C1']	3	2.0	4.0	RAC-1	contains following chiral atom(s)C	NA	7.0223	17.419	17.104	90.0	95.376	90.0	2082.98306887	1.36612124662	C24 H22 N1 O4 P1,0.5(H2 O1)	4-[(diphenylphosphoryl)methyl]-2,4-dimethyl-2-azaspiro[4.5]deca-6,9-diene-1,3,8-trione hemihydrate	273.1 K	None	None	colorless	None	None	None	None	Ju Wu, D.Ma, Guo Tang, Yufen Zhao
ZOXYIU	RACEMIC	NC_ND_NI	Strict definition of kryptoracemate	KRYPTORACEMIC	NO	P21	4	TRUE	FALSE	4.8	2	1	4	['C']	4	4	2	2	0	[[(1, 'SS'), (1, 'RR')]]	[2]	[2]	['racemic']	['C1']	2	2.0	4.0	RAC-1	contains following chiral atom(s)C	NA	8.031	19.073	7.437	90.0	105.96	90.0	1095.25407671	1.35973577279	C10 H12 N2 O4	1,3-Dinitro-2-phenylbutane	None	None	89-90deg.C	None	None	None	None	None	M.-P.D.Alcantara, F.C.Escribano, A.Gomez-Sanchez, M.J.Dianez, M.D.Estrada, A.Lopez-Castro, S.Perez-Garrido
ZUGGUD	RACEMIC	NC_ND_NI	Strict definition of kryptoracemate	KRYPTORACEMIC	NO	P21	4	TRUE	FALSE	None	2	1	10	['C']	10	8	5	5	0	[[(1, 'RRSSS'), (1, 'SSRRR')]]	[2]	[2]	['racemic']	['C1']	2	2.0	4.0	RAC-1	contains following chiral atom(s)C	NA	8.89	11.58	17.59	90.0	101.6	90.0	1773.83803677	1.20715974243	C17 H27 N2 O2 P1	8-(2-Hydroxy-1-methylbicyclo(3.1.0)hex-6-yl)-6,7-dimethyl-6,9-diaza-8-phosphabicyclo(4.3.0)nonane-8-one	None	None	None	None	None	None	None	Cell data not reported; values have been calculated. The given x and z coordinates for mol 2 have been reversed	S.Hanessian, D.Androtti, A.Gomtsyan
ZUPQEI	RACEMIC	NC_ND_I	Strict definition of kryptoracemate + achiral molecule	KRYPTORACEMIC	NO	P21	4	TRUE	FALSE	4.54	2	1	4	['C']	4	2	2	2	0	[[(1, 'SS'), (1, 'RR')]]	[2]	[2]	['racemic']	['C1']	4	2.0	4.0	RAC-1	contains following chiral atom(s)C	NA	11.2336	6.569	23.8716	90.0	102.137	90.0	1722.19416926	1.31836460705	C17 H24 N1 O4 1+,Cl1 1-	2-(((4-Methoxybenzoyl)oxy)methyl)-1-oxa-7-azoniaspiro[4.5]decane chloride	100 K	None	None	colorless	None	None	None	None	S.Kumar, P.D.Thornton, T.O.Painter, P.Jain, J.Downard, J.T.Douglas, C.Santini
ZUQFEY	RACEMIC	NC_ND_NI	Strict definition of kryptoracemate	KRYPTORACEMIC	NO	P212121	19	TRUE	FALSE	6.42	2	1	2	['C']	2	2	1	1	0	[[(1, 'S'), (1, 'R')]]	[2]	[2]	['racemic']	['C1']	2	2.0	8.0	RAC-1	contains following chiral atom(s)C	NA	10.1186	14.781	23.286	90.0	90.0	90.0	3482.72463741	1.18376144239	C15 H22 N2 O5	1-t-Butyl 3-ethyl 6-(2-oxopropyl)pyridazine-1,3(6H)-dicarboxylate	293 K	None	345 K	colorless	None	None	ethyl acetate/hexane	None	S.M.M.Lopes, M.S.C.Henriques, J.A.Paixao, T.M.V.D.P.e.Melo
ZUWHEG	RACEMIC	NC_ND_NI	Strict definition of kryptoracemate	KRYPTORACEMIC	NO	P21	4	TRUE	FALSE	8.53	2	1	2	['B']	0	0	1	1	0	[[(1, 'S'), (1, 'R')]]	[2]	[2]	['racemic']	['C1']	2	2.0	4.0	RAC-1	contains following chiral atom(s)B	NA	9.529	34.99	10.317	90.0	96.001	90.0	3421.0407883	1.3622757485	C46 H32 B1 N3 O2 S1	7-((4-methoxyphenyl)sulfinyl)-3,6,9,9c-tetraphenyl-9cH-8b,9b,9d-triaza-9c-boratricyclopenta[cd,gh,kl]phenalene	93 K	None	None	orange	None	None	Re-crystallisation from solvent: dichloromethane, n-hexane	None	K.Yoshida, A.Osuka
ZUYJOU	RACEMIC	NC_ND_I	Contains also at least an other enantiomer in enantiopure proportion	KRYPTORACEMIC	NO	P21221	18	TRUE	FALSE	6.71	4	2	6	['C']	6	6	5	1	0	[[(2, 'RR')], [(1, 'S'), (1, 'R')]]	[1, 2]	[2, 2]	['chiral', 'racemic']	['C3', 'C1']	4	1.0	4.0	RAC-1	contains following chiral atom(s)C	NA	45.506	8.484	9.489	90.0	90.0	90.0	3663.44578606	1.51009174202	2(C15 H26 N1 O3 1+),C4 H4 O6 2-	bis(2-hydroxy-N-isopropyl-3-(4-(2-methoxyethyl)phenoxy)propan-1-aminium) tartarate	100 K	None	None	None	None	None	None	None	Paola Paoli, P.Rossi, E.Macedi, A.Ienco, L.Chelazzi, G.L.Bartolucci, B.Bruni
ZZZOQK01	RACEMIC	NC_ND_NI	Strict definition of kryptoracemate	KRYPTORACEMIC	NO	P21	4	TRUE	FALSE	7.0	4	1	4	['C']	4	4	2	2	0	[[(2, 'S'), (2, 'R')]]	[2]	[4]	['racemic']	['C1']	4	4.0	8.0	RAC-2	contains following chiral atom(s)C	NA	9.2472	74.31	4.9523	90.0	97.514	90.0	3373.79771505	1.08042918528	C15 H30 O4	Î±-Monolaurin	None	None	63deg.C	None	beta polymorph	None	None	H14B1, H2A21 and H3B21 have been removed because of suspected error	M.Goto, T.Takiguchi
ABIVIT	RACEMIC	ND_D_NI	Strict definition of kryptoracemate	KRYPTORACEMIC	NO	P21	4	TRUE	TRUE	3.13	2	1	14	['C']	14	12	7	7	0	[[(1, 'RRSSRRS'), (1, 'SSRRSSR')]]	[2]	[2]	['racemic']	['C1']	2	2	4	RAC-1	contains following chiral atom(s)C	NA	7.2978	14.6967	18.417	90	98.629	90	1952.93	1.46697	C22 H23 Br1 O4	2-Methoxy-3-vinyl-2a,2a1,5,5a,6,7,8,8a-octahydro-2H-2,5-methanonaphtho[1,8-bc]furan-9-yl 4-bromobenzoate	173 K	None	None	colorless	None	None	None	None	L.Rycek, J.J.Hayward, M.A.Latif, J.Tanko, R.Simionescu, T.Hudlicky
ACICEU	RACEMIC	ND_D_NI	Strict definition of kryptoracemate	KRYPTORACEMIC	NO	P21	4	TRUE	TRUE	4.41	2	1	2	['C']	2	0	1	1	0	[[(1, 'S'), (1, 'R')]]	[2]	[2]	['racemic']	['C1']	2	2	4	RAC-1	contains following chiral atom(s)C	NA	12.584	10.083	13.956	90	102.57	90	1728.36	1.31581	C23 H18 O3	1-Oxo-13c-propoxy-1,13c-dihydrodibenzo(a,kl)xanthene	at 293 K	None	None	yellow	None	None	acetone	None	Duan-Min Tan, Yue-Peng Cai, Miao-Fen Liao, Cheng-Yong Su, Zun-Le Xu, Bei-Sheng Kang
AWIJAT	RACEMIC	ND_D_NI	Strict definition of kryptoracemate + achiral molecule	KRYPTORACEMIC	NO	P212121	19	TRUE	TRUE	4.23	2	1	16	['C']	16	12	8	8	0	[[(1, 'SRSSRSRR'), (1, 'RSRRSRSS')]]	[2]	[2]	['racemic']	['C2']	5	2	8	RAC-1	contains following chiral atom(s)C	NA	17.0903	18.3158	23.1712	90	90	90	7253.11	1.29827	C38 H32 N4 O2,1.5(C4 H8 O2)	2,6b,11a,11b,15,19b,24a,24b-octahydro-1H,14H-bisbenzo[7,8]indolizino[2,1-a:2',1'-d]indolo[3,2-b]carbazole-12,25(11H,24H)-dione ethyl acetate solvate	110.0 K	None	None	orange	None	None	ethyl acetate	None	S.Chambers
AWUVUJ	SCALEMIC	ND_D_NI	Unbalanced Kryptoracemate + achiral molecule	KRYPTORACEMIC	NO	P212121	19	TRUE	TRUE	7.71	3	1	3	['C']	3	3	2	1	0	[[(1, 'S'), (2, 'R')]]	[2]	[3]	['scalemic']	['C1']	5	3	12	scal-3-attention could contain stereoisomer	contains following chiral atom(s)C	NA	13.139	16.481	28.444	90	90	90	6159.37	1.32461	C23 H22 F3 N3,0.67(H2 O1)	(+-)-2,8-Diisopropyl-5-trifluoromethyl-7,8-dihydro-1,12-iminobenzo(c)pyrido(4,3,2-ef)(1)benzazepine hydrate	at 173 K	None	141-144deg.C	yellow	None	None	ethanol	None	A.M.Al-Khashashneh, M.M.El-Abadelah, R.Boese
AXEGEQ	RACEMIC	ND_D_NI	Strict definition of kryptoracemate	KRYPTORACEMIC	NO	P212121	19	TRUE	TRUE	3.62	2	1	2	['C']	2	0	1	1	0	[[(1, 'S'), (1, 'R')]]	[2]	[2]	['racemic']	['C1']	2	2	8	RAC-1	contains following chiral atom(s)C	NA	8.4092	16.8186	25.1187	90	90	90	3552.56	1.31587	C18 H21 N1 O5	2-Benzyl-1-((2-methoxy-2-oxoethyl)amino)-1-oxopent-4-en-2-yl acrylate	at 153 K	None	None	None	None	None	None	None	A.Schwablein, J.Martens
BACTUX	RACEMIC	ND_D_NI	Strict definition of kryptoracemate	KRYPTORACEMIC	NO	P21	4	TRUE	TRUE	5.67	2	1	2	['P']	0	0	1	1	0	[[(1, 'S'), (1, 'R')]]	[2]	[2]	['racemic']	['C1']	2	2	4	RAC-1	contains following chiral atom(s)P	NA	10.3219	14.7114	15.3878	90	100.192	90	2299.76	1.45745	C30 H17 P1 S3	1-Phenyl-2-(3-thienyl)-1H-phenanthro[9',10',1':3,4,5]phosphindolo[6,7-b]thiophene 1-sulfide	150 K	None	None	orange	None	None	None	None	W.Delaunay, R.Szucs, S.Pascal, A.Mocanu, P.-A.Bouit, L.Nyulaszi, M.Hissler
BEXGUI	RACEMIC	ND_D_NI	Contains also at least an other enantiomer in enantiopure proportion + achiral molecule	KRYPTORACEMIC	NO	P21	4	TRUE	TRUE	4.21	4	2	4	['C']	4	4	1	3	0	[[(2, 'S')], [(1, 'S'), (1, 'R')]]	[1, 2]	[2, 2]	['chiral', 'racemic']	['C1']	6	2	4	RAC-1	contains following chiral atom(s)C	NA	13.122	5.898	24.075	90	95.56	90	1854.48	1.30159	C14 H14 O3,C5 H9 N1 O2,H2 O1	Pyrrolidinium-2-carboxylate 2-(6-methoxy-2-naphthyl)propanoic acid monohydrate	293 K	None	None	colorless	None	None	None	None	A.Tilborg, G.Springuel, B.Norberg, J.Wouters, T.Leyssens
BHXOCO	RACEMIC	ND_D_NI	Strict definition of kryptoracemate + achiral molecule	KRYPTORACEMIC	NO	P1	1	TRUE	TRUE	12	2	1	8	['C']	8	8	4	4	0	[[(1, 'RSSR'), (1, 'SRRS')]]	[2]	[2]	['racemic']	['C1']	3	3	3	RAC-1	contains following chiral atom(s)C	NA	6.69	10.6	10.1	61.35	101.1	107.8	597.545	1.4506	C7 H9 Br1 O3	6Î²-Bromo-7Î±-hydroxy-2-oxabicyclo(3.3.0)octan-3-one	None	None	None	None	None	None	None	None	A.Brown, R.Glen, P.Murray-Rust, J.Murray-Rust, R.F.Newton
CAKDOK	RACEMIC	ND_D_NI	Contains also at least an other enantiomer in enantiopure proportion	KRYPTORACEMIC	NO	P21	4	TRUE	TRUE	5.45	4	2	72	['C']	72	72	57	15	0	[[(2, 'RRRRRRRRRRRRRRRRRRRRRSRRSRSRSRSRSRS')], [(1, 'S'), (1, 'R')]]	[1, 2]	[2, 2]	['chiral', 'racemic']	['C1']	4	2	4	RAC-1	contains following chiral atom(s)C	NA	10.7521	52.786	16.131	90	108.418	90	8686.35	1.20029	C63 H112 O35,C8 H9 F1 O1	(rac)-1-(4-fluorophenyl)ethan-1-ol 36,37,38,39,40,41,42,43,44,45,46,47,48,49-tetradecamethoxy-5,10,15,20,25,30,35-heptakis(methoxymethyl)-2,4,7,9,12,14,17,19,22,24,27,29,32,34-tetradecaoxaoctacyclo[31.2.2.23,6.28,11.213,16.218,21.223,26.228,31]nonatetracontane	296 K	None	None	colorless	None	None	None	None	Y.Amharar, A.Grandeury, M.Sanselme, S.Petit, G.Coquerel
CAPFIL	RACEMIC	ND_D_NI	Strict definition of kryptoracemate	KRYPTORACEMIC	NO	P21	4	TRUE	TRUE	4.88	2	1	2	['C']	2	2	1	1	0	[[(1, 'S'), (1, 'R')]]	[2]	[2]	['racemic']	['C1']	2	2	4	RAC-1	contains following chiral atom(s)C	NA	8.7134	19.0666	10.8529	90	95.331	90	1795.25	1.27804	C19 H20 F1 N1 O2 S1	N-(2-(4-fluorophenyl)cyclohex-2-en-1-yl)-4-methylbenzenesulfonamide	296 K	None	None	colorless	None	None	None	None	Meng-Yang Chang, Yi-Chia Chen, Chieh-Kai Chan
CAYXAE	RACEMIC	ND_D_NI	Strict definition of kryptoracemate	KRYPTORACEMIC	NO	P21	4	TRUE	TRUE	5.59	2	1	2	['C']	2	2	1	1	0	[[(1, 'S'), (1, 'R')]]	[2]	[2]	['racemic']	['C1']	2	2	4	RAC-1	contains following chiral atom(s)C	NA	8.8169	22.4696	11.322	90	98.183	90	2220.19	1.36889	C26 H19 N1 O3 S2	2-[1-(1-methyl-1H-indol-3-yl)-2-oxo-2-(thiophen-2-yl)ethyl]phenyl thiophene-2-carboxylate	200 K	None	None	colorless	None	None	None	None	Yi-Ru Chen, G.M.Reddy, Shao-Hao Hong, Ying-Zheng Wang, Jhen-Kuei Yu, Wenwei Lin
CIZGIC	RACEMIC	ND_D_NI	Strict definition of kryptoracemate + achiral molecule	KRYPTORACEMIC	NO	P21	4	TRUE	TRUE	4.11	2	1	4	['C']	4	4	2	2	0	[[(1, 'SS'), (1, 'RR')]]	[2]	[2]	['racemic']	['C1']	3	2	4	RAC-1	contains following chiral atom(s)C	NA	10.4584	10.6321	19.2537	90	97.473	90	2122.73	1.38979	C21 H24 N2 O3 S1,0.5(C1 H1 Cl3)	6,6-Dimethyl-1-phenyl-2-tosylhexahydro-3H-pyrrolo(1,2-c)imidazol-3-one chloroform solvate	at 123 K	None	None	colorless	None	None	None	None	K.Muniz, C.H.Hovelmann, E.Campos-Gomez, J.Barluenga, J.M.Gonzalez, J.Streuff, M.Nieger
COBLIQ	RACEMIC	ND_D_NI	Strict definition of kryptoracemate	KRYPTORACEMIC	NO	P21	4	TRUE	TRUE	8.2	2	1	2	['C']	2	0	1	1	0	[[(1, 'S'), (1, 'R')]]	[2]	[2]	['racemic']	['C1']	2	2	4	RAC-1	contains following chiral atom(s)C	NA	10.7328	23.657	11.0874	90	115.219	90	2546.83	1.30262	C27 H25 Cl2 F1 N2 S1	4,6-bis(4-chlorophenyl)-N-(3-fluorophenyl)-3-isobutyl-6-methyl-3,6-dihydro-2H-1,3-thiazin-2-imine	at 293 K	None	373 K	colorless	None	None	None	None	I.Skrastina, A.Baran, D.Muceniece, J.Popelis
CUMYOZ	RACEMIC	ND_D_NI	Strict definition of kryptoracemate	KRYPTORACEMIC	NO	P212121	19	TRUE	TRUE	4.16	2	1	8	['C']	8	6	4	4	0	[[(1, 'RRSR'), (1, 'SSRS')]]	[2]	[2]	['racemic']	['C1']	2	2	8	RAC-1	contains following chiral atom(s)C	NA	6.5407	17.863	23.4055	90	90	90	2734.62	1.71076	C12 H17 I1 O4	Methyl 1-(1-iodopropyl)-3-oxotetrahydro-1H-cyclopenta[c]furan-3a(3H)-carboxylate	at 150 K	None	None	colorless	None	None	None	None	L.Curry, M.S.Hallside, L.H.Powell, S.J.Sprague, J.W.Burton
CUXHUZ06	RACEMIC	ND_D_NI	Contains also at least an other enantiomer in enantiopure proportion	KRYPTORACEMIC	NO	P1	1	TRUE	TRUE	3.73	4	2	6	['C']	6	6	5	1	0	[[(1, 'S'), (1, 'R')], [(2, 'RR')]]	[2, 1]	[2, 2]	['racemic', 'chiral']	['C1']	4	2	2	Wa-could be Diast	contains following chiral atom(s)C	NA	9.5967	10.0115	17.121	95.915	95.964	96.158	1615.71	1.19185	C34 H34 O4,C4 H11 N1	1,4-Dioxaspiro[4.5]decane-2,3-diylbis(diphenylmethanol) butan-2-amine solvate	at 173 K	None	None	colorless	None	None	None	The disorder is a result of butan-2-amine being disordered between the (R) and (S) configurations.	N.B.Bathori, L.R.Nassimbeni
DAHSIR	RACEMIC	ND_D_NI	Strict definition of kryptoracemate + achiral molecule	KRYPTORACEMIC	NO	P21	4	TRUE	TRUE	6.12	2	1	4	['C']	4	4	2	2	0	[[(1, 'SR'), (1, 'RS')]]	[2]	[2]	['racemic']	['C1']	3	2	4	RAC-1	contains following chiral atom(s)C	NA	11.1383	25.3721	12.0025	90	116.124	90	3045.42	1.26095	C37 H33 N3 O1,0.5(C1 H2 Cl2)	2-benzyl-3-((1-methyl-1H-indol-3-yl)methyl)-5-phenyl-N-(quinolin-8-yl)pent-4-enamide dichloromethane solvate	100 K	None	None	colorless	None	None	None	None	Zhen Liu, Tian Zeng, K.S.Yang, K.M.Engle
DEWMEA	RACEMIC	ND_D_NI	Contains also at least an other enantiomer in enantiopure proportion + achiral molecule	KRYPTORACEMIC	NO	P1	1	TRUE	TRUE	6.89	4	2	72	['C']	72	72	57	15	0	[[(2, 'RRSRRRRSRRRRSRRRRSRRRRSRRRRSRRRRSRR')], [(1, 'S'), (1, 'R')]]	[1, 2]	[2, 2]	['chiral', 'racemic']	['C1']	27	2	2	RAC-1	contains following chiral atom(s)C	NA	15.383	15.409	17.713	113.898	99.431	102.109	3604.91	1.62795	C42 H70 O35,C10 H20 O1,11.7(H2 O1)	Î²-cyclodextrin Î²-citronellol hydrate	100 K	None	None	colorless	None	None	None	None	K.Fourtaka, E.Christoforides, D.Mentzafos, K.Bethanis
DUSCOL	RACEMIC	ND_D_NI	Strict definition of kryptoracemate	KRYPTORACEMIC	NO	P21	4	TRUE	TRUE	4.49	2	1	4	['C']	4	0	2	2	0	[[(1, 'SS'), (1, 'RR')]]	[2]	[2]	['racemic']	['C1']	2	2	4	RAC-1	contains following chiral atom(s)C	NA	5.8267	11.0347	21.6517	90	97.322	90	1380.76	1.17533	C13 H24 O4	8-isobutyl-10-methyl-6,7-dioxaspiro[4.5]decane-8,10-diol	294 K	None	337 K	colorless	None	None	None	None	L.Novkovic, M.Trmcic, M.Rodic, F.Bihelovic, M.Zlatar, R.Matovic, R.N.Saicic
EGOXEG	RACEMIC	ND_D_NI	Strict definition of kryptoracemate	KRYPTORACEMIC	NO	P1	1	TRUE	TRUE	4.13	2	1	6	['C']	6	6	3	3	0	[[(1, 'SRR'), (1, 'RSS')]]	[2]	[2]	['racemic']	['C1']	2	2	2	RAC-1	contains following chiral atom(s)C	NA	9.4418	12.2002	13.6897	99.236	104.558	97.6	1481.73	1.28951	C29 H41 N1 O6 S1 Si1	2-[5-(4-methoxyphenyl)-2,5-dihydrofuran-2-yl]-N-[(4-methylphenyl)sulfonyl]-2-{[tri-isopropylsilyl]oxy}acetamide	296 K	None	None	colorless yellow	None	None	None	None	S.Domin, J.Kedzierski, B.K.Zambron
EMUQIO	RACEMIC	ND_D_NI	Strict definition of kryptoracemate	KRYPTORACEMIC	NO	P21	4	TRUE	TRUE	8.42	2	1	2	['C']	2	2	1	1	0	[[(1, 'S'), (1, 'R')]]	[2]	[2]	['racemic']	['C1']	2	2	4	RAC-1	contains following chiral atom(s)C	NA	9.383	15.047	10.395	90	91.126	90	1467.35	1.26892	C20 H12 N2	2-(4-ethynylphenyl)azulene-1,1(8aH)-dicarbonitrile	122 K	None	None	None	None	None	None	None	A.Vlasceanu, C.L.Andersen, C.R.Parker, O.Hammerich, T.J.Morsing, M.Jevric, S.L.Broman, A.Kadziola, M.B.Nielsen
FAZSOR	RACEMIC	ND_D_NI	Strict definition of kryptoracemate + achiral molecule	KRYPTORACEMIC	NO	P21	4	TRUE	TRUE	5.45	2	1	12	['C']	12	8	6	6	0	[[(1, 'RSRRSR'), (1, 'SRSSRS')]]	[2]	[2]	['racemic']	['C1']	5	2	4	RAC-1	contains following chiral atom(s)C	NA	11.9665	19.693	15.9001	90	109.008	90	3542.65	1.37564	C30 H22 F6 N4 O4,1.5(C2 H6 O1 S1)	3,8-bis(furan-2-yl)-4,9-diphenyl-2,7-bis(trifluoromethyl)-3a,4,8a,9-tetrahydro-3H,8H-dipyrazolo[1,5-a:1',5'-d]pyrazine-4,9-diol dimethyl sulfoxide solvate	296 K	None	None	colorless	None	None	None	None	Shuang Qin, Yan Zheng, Fa-guang Zhang, Jun-an Ma
FEJLOW	RACEMIC	ND_D_NI	Strict definition of kryptoracemate	KRYPTORACEMIC	NO	P21	4	TRUE	TRUE	3.84	2	1	2	['C']	2	0	1	1	0	[[(1, 'S'), (1, 'R')]]	[2]	[2]	['racemic']	['C1']	2	2	4	RAC-1	contains following chiral atom(s)C	NA	8.575	22.507	11.773	90	93.701	90	2267.42	1.55085	C29 H24 I1 N1 O1	3-(3-iodo-4-pyrrolidinophenyl)-3-phenyl-3H-naphtho[2,1-b]pyran	at 120 K	None	123-126 deg.C	colorless	None	None	None	None	C.D.Gabbutt, B.M.Heron, A.C.Instone, P.N.Horton, M.B.Hursthouse
FEKQIW	RACEMIC	ND_D_NI	Strict definition of kryptoracemate + achiral molecule	KRYPTORACEMIC	NO	P1	1	TRUE	TRUE	6.96	2	1	4	['C']	4	2	2	2	0	[[(1, 'SS'), (1, 'RR')]]	[2]	[2]	['racemic']	['C1']	3	1	1	RAC-1	contains following chiral atom(s)C	NA	9.842	15.123	8.221	100.54	113.02	96.42	1084.21	1.29402	2(C21 H18 O6),C6 H12 N2	bis(Dimethyl 5-hydroxy-2-oxo-4,5-diphenylcyclopent-3-ene-1,3-dicarboxylate) 1,4-diazabicyclo(2.2.2)octane clathrate	at 293.2 K	None	131-132 deg.C	colorless	None	None	None	None	K.Yamaguchi, S.Nakatomi, Y.Yoshitake, K.Harano
FOWREO	RACEMIC	ND_D_NI	Strict definition of kryptoracemate	KRYPTORACEMIC	NO	P212121	19	TRUE	TRUE	15	2	1	2	['C']	2	2	1	1	0	[[(1, 'S'), (1, 'R')]]	[2]	[2]	['racemic']	['C1']	2	2	8	RAC-1	contains following chiral atom(s)C	NA	9.182	25.22	12.49	90	90	90	2892.31	1.36082	C14 H12 N6 O2	7-(Indol-3-yl)-2-methyl-6-nitro-4,7-dihydro-1,2,4-triazolo(1,5-a)pyrimidine	None	None	250-252deg.C	None	None	None	None	z(C10) should probably be 0.093 (not 0.930)	T.L.Pilicheva, V.L.Rusinov, O.N.Chupakhin, N.A.Klyuev, G.G.Aleksandrov, S.E.Esipov
FURQAM01	RACEMIC	ND_D_NI	Strict definition of kryptoracemate	KRYPTORACEMIC	NO	P21	4	TRUE	TRUE	10.38	2	1	4	['C']	4	0	2	2	0	[[(1, 'SR'), (1, 'RS')]]	[2]	[2]	['racemic']	['C1']	2	2	4	RAC-1	contains following chiral atom(s)C	NA	12.8578	14.1427	14.4105	90	110.053	90	2461.6	1.59604	0.8(C28 H19 Br1 N2 O4 S2),0.2(C14 H10 N2 O4 S2),0.2(C14 H9 Br1)	1-bromo-6,25-diallyl-3,9-dithia-6,25-diazaheptacyclo[9.6.6.32,10.02,10.04,8.012,17.018,23]hexacosa-4(8),12,14,16,18,20,22-heptaene-5,7,24,26-tetrone 2,6-diallyl-1H,5H-pyrrolo[3',4':5,6][1,4]dithiino[2,3-c]pyrrole-1,3,5,7(2H,6H)-tetrone 9-bromoanthracene	173 K	None	None	yellow	None	None	None	None	S.Khorasani, D.S.Botes, M.A.Fernandes, D.C.Levendis
GENLET01	RACEMIC	ND_D_NI	Strict definition of kryptoracemate	KRYPTORACEMIC	NO	P21	4	TRUE	TRUE	5.29	4	1	4	['C']	4	4	2	2	0	[[(2, 'S'), (2, 'R')]]	[2]	[4]	['racemic']	['C1']	4	4	8	RAC-2	contains following chiral atom(s)C	NA	8.406	35.455	12.722	90	106.65	90	3632.63	1.31602	C19 H18 Cl1 N1 O2 S1	rac-3-chloro-5-hydroxy-1-[(4-methylphenyl)methyl]-4-[(4-methylphenyl)sulfanyl]-1,5-dihydro-2H-pyrrol-2-one	293 K	None	423 K	colorless	beta polymorph	None	benzene	None	O.A.Lodochnikova, L.S.Kosolapova, A.F.Saifina, A.T.Gubaidullin, R.R.Fayzullin, A.R.Khamatgalimov, I.A.Litvinov, A.R.Kurbangalieva
GIPLID	RACEMIC	ND_D_NI	Strict definition of kryptoracemate	KRYPTORACEMIC	NO	P1	1	TRUE	TRUE	3.31	6	1	18	['C']	18	12	9	9	0	[[(3, 'RRR'), (3, 'SSS')]]	[2]	[6]	['racemic']	['C1']	6	6	6	RAC-2	contains following chiral atom(s)C	NA	6.4643	8.7696	33.415	93.557	92.653	98.412	1867.34	1.37869	C12 H18 O2 S2	5-methylspiro[bicyclo[2.2.2]octane-2,2'-[1,3]dithiolane]-5-carboxylic acid	100 K	None	None	colorless	None	None	None	None	S.M.Cooper, W.E.Crowe, F.R.Fronczek
HAJGEH	RACEMIC	ND_D_NI	Strict definition of kryptoracemate	KRYPTORACEMIC	NO	P21	4	TRUE	TRUE	2.96	2	1	4	['C']	4	4	2	2	0	[[(1, 'SS'), (1, 'RR')]]	[2]	[2]	['racemic']	['C1']	2	2	4	RAC-1	contains following chiral atom(s)C	NA	8.6249	14.82	10.971	90	95.98	90	1394.69	1.39721	C15 H19 N1 O3 S1	2-((4-methylphenyl)sulfonyl)octahydro-5H-isoindol-5-one	173.2 K	None	None	colorless	None	None	None	None	Gang-Wei Wang, N.G.McCreanor, M.H.Shaw, W.G.Whittingham, J.F.Bower
HAWPIG	RACEMIC	ND_D_NI	Strict definition of kryptoracemate	KRYPTORACEMIC	NO	P212121	19	TRUE	TRUE	3.5	2	1	4	['C']	4	4	2	2	0	[[(1, 'SR'), (1, 'RS')]]	[2]	[2]	['racemic']	['C1']	2	2	8	RAC-1	contains following chiral atom(s)C	NA	10.053	10.513	37.598	90	90	90	3973.63	1.24848	C23 H23 N3 O2	(R,S)-N,N'-bis(1-phenylethyl)pyridine-2,6-dicarboxamide	at 149 K	None	None	colorless	None	None	None	None	K.T.Hua, Jide Xu, E.E.Quiroz, S.Lopez, A.J.Ingram, V.A.Johnson, A.R.Tisch, A.de Bettencourt-Dias, D.A.Straus, G.Muller
HEFZUP	RACEMIC	ND_D_NI	Strict definition of kryptoracemate	KRYPTORACEMIC	NO	P1	1	TRUE	TRUE	15.74	2	1	2	['C']	2	0	1	1	0	[[(1, 'S'), (1, 'R')]]	[2]	[2]	['racemic']	['C1']	2	2	2	RAC-1	contains following chiral atom(s)C	NA	6.801	8.232	28.08	95.03	90.61	91.551	1565.32	0.876866	C23 H18 Cl2 O3	2,4-bis(4-chlorophenyl)-7-methoxy-4-methyl-4H-chromen-8-ol	at 296 K	None	None	colorless	None	None	None	We calculate 28% void space in the structure.	Wei-Jian Xue, Qi Li, Fang-fang Gao, Yan-ping Zhu, Jun-gang Wang, Wei Zhang, An-Xin Wu
HIFMUG	RACEMIC	ND_D_NI	Strict definition of kryptoracemate	KRYPTORACEMIC	NO	P21	4	TRUE	TRUE	17.22	2	1	2	['C']	2	2	1	1	0	[[(1, 'S'), (1, 'R')]]	[2]	[2]	['racemic']	['C1']	2	2	4	RAC-1	contains following chiral atom(s)C	NA	8.0528	11.9625	24.136	90	93.301	90	2321.2	1.34367	C26 H28 F1 N1 O4 S1	Ethyl 3-(fluoro(2-((4-methylphenyl)sulfonyl)-2,3,4a,5,6,7-hexahydroisoquinolin-4(1H)-ylidene)methyl)benzoate	at 200 K	None	None	colorless	None	None	None	None	M.-C.P.Yeh, Chia-Jung Liang, Tzu-Lin Huang, Hsiao-Ju Hsu, Yu-Shuo Tsau
HIKGEN	RACEMIC	ND_D_NI	Strict definition of kryptoracemate	KRYPTORACEMIC	NO	P21	4	TRUE	TRUE	3.37	2	1	4	['C']	4	2	2	2	0	[[(1, 'SR'), (1, 'RS')]]	[2]	[2]	['racemic']	['C1']	2	2	4	RAC-1	contains following chiral atom(s)C	NA	9.153	11.495	10.277	90	93.161	90	1079.64	1.3597	C12 H15 N1 O3	Spiro(1-azabicyclo(5.3.0)decane-6,2'(5'H)-furan)-2'10-dione	at 183 K	None	None	colorless	None	None	None	None	S.F.Martin, S.K.Bur
IFEJEL	RACEMIC	ND_D_NI	Strict definition of kryptoracemate	KRYPTORACEMIC	NO	P21	4	TRUE	TRUE	4.21	2	1	4	['C']	4	4	2	2	0	[[(1, 'SS'), (1, 'RR')]]	[2]	[2]	['racemic']	['C1']	2	2	4	RAC-1	contains following chiral atom(s)C	NA	5.66625	18.3197	17.6253	90	90.314	90	1829.55	1.24677	C23 H21 N1 O2	ethyl 4-(2,3-diphenylaziridin-1-yl)benzoate	173 K	None	None	colorless	None	None	None	None	F.Sebest, L.Casarrubios, H.S.Rzepa, A.J.P.White, S.Diez-Gonzalez
IFEJOV	RACEMIC	ND_D_NI	Strict definition of kryptoracemate	KRYPTORACEMIC	NO	P21	4	TRUE	TRUE	4.93	2	1	2	['C']	2	2	1	1	0	[[(1, 'S'), (1, 'R')]]	[2]	[2]	['racemic']	['C1']	2	2	4	RAC-1	contains following chiral atom(s)C	NA	5.35503	10.169	32.73	90	92.72	90	1780.31	1.28862	C18 H23 N3 O4	ethyl 4-{4-[cyclohexyl(hydroperoxy)methyl]-1H-1,2,3-triazol-1-yl}benzoate	173 K	None	None	colorless	None	None	None	None	F.Sebest, L.Casarrubios, H.S.Rzepa, A.J.P.White, S.Diez-Gonzalez
IGAFIG	RACEMIC	ND_D_NI	Strict definition of kryptoracemate	KRYPTORACEMIC	NO	P212121	19	TRUE	TRUE	5.33	2	1	4	['C']	4	4	2	2	0	[[(1, 'SS'), (1, 'RR')]]	[2]	[2]	['racemic']	['C1']	2	2	8	RAC-1	contains following chiral atom(s)C	NA	9.631	16.909	22.485	90	90	90	3661.7	1.33432	C19 H17 Cl1 F3 N1 O1	(E)-3-(2-Chloro-3,3,3-trifluoroprop-1-enyl)-2,2-dimethyl-N-(2-naphthyl)cyclopropanecarboxamide	at 113 K	None	None	colorless	None	None	methanol/ethyl acetate	None	Dong-Qing Liu, Fan-Yong Yan
IGAKEI	RACEMIC	ND_D_NI	Strict definition of kryptoracemate + achiral molecule	KRYPTORACEMIC	NO	P21	4	TRUE	TRUE	5.07	8	1	16	['C']	16	16	8	8	0	[[(4, 'SS'), (4, 'RR')]]	[2]	[8]	['racemic']	['C1']	16	8	16	RAC-2	contains following chiral atom(s)C	NA	13.4929	24.7866	21.62	90	105.39	90	6971.38	1.20588	C19 H23 F1 N2,H2 O1	(2R,5R)-2-benzyl-1-(4-fluorobenzyl)-5-methylpiperazine monohydrate	at 90 K	None	None	colorless	None	None	None	None	Huimin Zhai, A.Borzenko, Ying Yin Lau, Shin Hye Ahn, L.L.Schafer
IJIHOZ	RACEMIC	ND_D_NI	Strict definition of kryptoracemate + achiral molecule	KRYPTORACEMIC	NO	P1	1	TRUE	TRUE	10.6	4	1	4	['C']	4	4	1	3	0	[[(3, 'S'), (1, 'R')]]	[2]	[4]	['racemic']	['C1']	6	4	4	RAC-2	contains following chiral atom(s)C	NA	5.721	11.617	24.595	93.91	90.624	103.852	1582.75	1.21181	C13 H18 O2,0.5(C10 H8 N2)	2-(4-Isobutylphenyl)propanoic acid hemikis(4,4'-bipyridine)	at 293 K	None	None	None	None	None	None	In the crystal the static disorder is a result of (R)- and (S)- enantiomers of ibuprofen randomly distributed in the crystal lattice. The (S) enantiomer is the major occupancy.	Shuang Chen, H.Xi, R.F.Henry, I.Marsden, G.G.Z.Zhang
JEKRIB	RACEMIC	ND_D_NI	Strict definition of kryptoracemate	KRYPTORACEMIC	NO	P212121	19	TRUE	TRUE	5.02	2	1	2	['P']	0	0	1	1	0	[[(1, 'S'), (1, 'R')]]	[2]	[2]	['racemic']	['C1']	2	2	8	RAC-1	contains following chiral atom(s)P	NA	8.984	9.2978	37.205	90	90	90	3107.79	1.26232	C15 H22 N1 O3 P1	2-ethoxy-4H-spiro[1,4,2-benzoxazaphosphinine-3,1'-cycloheptane] 2-oxide	at 294 K	None	87-89 deg.C	None	None	None	None	None	Bin Wang, Ru-Yu Chen, You Huang, Zhi-Wei Miao
JIZJOR03	RACEMIC	ND_D_NI	Strict definition of kryptoracemate	KRYPTORACEMIC	NO	P21	4	TRUE	TRUE	10.52	4	1	4	['C']	4	0	2	2	0	[[(2, 'S'), (2, 'R')]]	[2]	[4]	['racemic']	['C1']	4	4	8	RAC-2	contains following chiral atom(s)C	NA	11.6895	11.6246	26.7418	90	102.242	90	3551.2	1.2285	C22 H20 N2 O1	1,3,3-trimethyl-1,3-dihydrospiro[indole-2,3'-naphtho[2,1-b][1,4]oxazine]	297 K	None	None	None	monoclinic P21 polymorph	None	None	None	P.R.Sahoo, S.Kumar
JUCRUW	RACEMIC	ND_D_NI	Strict definition of kryptoracemate	KRYPTORACEMIC	NO	P65	170	TRUE	TRUE	10.84	2	1	4	['C']	4	2	2	2	0	[[(1, 'SS'), (1, 'RR')]]	[2]	[2]	['racemic']	['C1']	2	2	12	RAC-1	contains following chiral atom(s)C	NA	21.554	21.554	15.8983	90	90	120	6396.42	1.50496	C13 H16 Br1 I1 N2 O4	t-Butyl (2-bromo-2-iodo-2-nitro-1-phenylethyl)carbamate unknown solvate	150 K	None	None	colorless	None	None	dichloromethane/hexane	None	Jing Li, M.J.Lear, Eunsang Kwon, Yujiro Hayashi
KAZTIR	RACEMIC	ND_D_NI	Strict definition of kryptoracemate	KRYPTORACEMIC	NO	P21	4	TRUE	TRUE	6.79	4	1	8	['C']	8	8	6	2	0	[[(1, 'SS'), (3, 'RR')]]	[2]	[4]	['racemic']	['C1']	4	4	8	RAC-2	contains following chiral atom(s)C	NA	18.7446	11.0884	14.2531	90	90.3646	90	2962.41	1.33336	C16 H21 F2 N1 O2	3-fluoro-2-[fluoro(phenyl)methyl]-3-methyl-1-(morpholin-4-yl)butan-1-one	100 K	None	None	colorless	None	None	None	None	S.M.Banik, K.M.Mennie, E.N.Jacobsen
KELQEZ	SCALEMIC	ND_D_NI	Unbalanced Kryptoracemate + achiral molecule	KRYPTORACEMIC	NO	P1	1	TRUE	TRUE	5.79	3	1	9	['C']	9	9	5	4	0	[[(1, 'SRS'), (2, 'RSR')]]	[2]	[3]	['scalemic']	['C1']	4	1	1	scal-3-attention could contain stereoisomer	contains following chiral atom(s)C	NA	8.246	11.297	15.997	95.19	103.399	90.346	1443.13	1.37765	3(C18 H19 N1 O5),C14 H11 N1 O1	tris((5RS,6RS,7aSR)-3-oxo-2-phenyl-2,3,3a,4,5,6-hexahydro-1H-isoindole-5,6-diyl diacetate) 2-phenylisoindolin-1-one	at 100 K	None	None	colorless	None	None	None	None	F.I.Zubkov, V.P.Zaitsev, E.S.Puzikova, E.V.Nikitina, V.N.Khrustalev, P.A.Novikov, A.V.Varlamov
KUSTOJ	RACEMIC	ND_D_NI	Strict definition of kryptoracemate	KRYPTORACEMIC	NO	P1	1	TRUE	TRUE	5.39	2	1	4	['C']	4	4	2	2	0	[[(1, 'SR'), (1, 'RS')]]	[2]	[2]	['racemic']	['C1']	2	2	2	RAC-1	contains following chiral atom(s)C	NA	7.6145	7.9079	9.6513	99.938	98.057	106.992	536.119	1.26535	C13 H16 O2	7-methoxy-2,3,3a,4,9,9a-hexahydronaphtho[2,3-b]furan	100 K	None	None	colorless	None	None	None	None	Y.Miller, Lei Miao, A.S.Hosseini, S.R.Chemler
LAHVUN	RACEMIC	ND_D_NI	Strict definition of kryptoracemate	KRYPTORACEMIC	NO	P212121	19	TRUE	TRUE	6.79	2	1	2	['C']	2	2	1	1	0	[[(1, 'S'), (1, 'R')]]	[2]	[2]	['racemic']	['C1']	2	2	8	RAC-1	contains following chiral atom(s)C	NA	7.162	16.4	21.88	90	90	90	2569.95	1.36617	C17 H13 F1 N2	4-(4-Fluorophenyl)-4,5-dihydropyrrolo[1,2-a]quinoxaline	at 120 K	None	None	green	None	None	None	None	J.C.Castillo, R.Abonia, J.Cobo, C.Glidewell
LAZLON	RACEMIC	ND_D_NI	Strict definition of kryptoracemate	KRYPTORACEMIC	NO	P212121	19	TRUE	TRUE	5.93	2	1	4	['C']	4	4	2	2	0	[[(1, 'SR'), (1, 'RS')]]	[2]	[2]	['racemic']	['C1']	2	2	8	RAC-1	contains following chiral atom(s)C	NA	11.685	17.754	9.28	90	90	90	1925.19	1.28143	C8 H14 F1 N1 O2	cis-t-Butyl 2-fluorocyclopropylcarbamate	None	None	331-333 K	colorless	None	None	None	No sg published; P212121 assumed	S.Atarashi, M.Imamura, Y.Kimura, A.Yoshida, I.Hayakawa
LEVPEH	RACEMIC	ND_D_NI	Contains also at least an other enantiomer in enantiopure proportion	KRYPTORACEMIC	NO	P21	4	TRUE	TRUE	5.5	4	2	8	['C']	8	8	3	5	0	[[(2, 'SSR')], [(1, 'S'), (1, 'R')]]	[1, 2]	[2, 2]	['chiral', 'racemic']	['C1']	4	2	4	RAC-1	contains following chiral atom(s)C	NA	13.0454	28.1359	8.7936	90	94.114	90	3219.32	1.28283	C33 H27 N1 O3,C7 H12 O1	2(S)-(9,10-Dihydro-9,10-ethanoanthracene-11,12-dicarboximido)-1,1-diphenylpropan-1-ol 3-methylcyclohexanone clathrate	None	None	None	None	None	None	None	None	E.Weber, C.Reutel, C.Foces-Foces, A.L.Llamas-Saiz
LOPWOC	RACEMIC	ND_D_NI	Contains also at least an other enantiomer in enantiopure proportion	KRYPTORACEMIC	NO	P212121	19	TRUE	TRUE	5.13	3	2	6	['C']	6	6	5	1	0	[[(1, 'RRRR')], [(1, 'S'), (1, 'R')]]	[1, 2]	[1, 2]	['chiral', 'racemic']	['C1']	3	1	4	RAC-1	contains following chiral atom(s)C	NA	14.192	14.961	27.725	90	90	90	5886.75	1.20986	C62 H56 O8,2(C3 H5 N1 O1)	(R,R,R,R)-(-)-trans,trans-2,3,9,10-tetrakis(Hydroxydiphenylmethyl)-1,4,8,11-tetraoxadispiro(4.1.4.3)tetradecane bis((+-)-2-hydroxypropionitrile) clathrate	None	None	133-135 deg.C	colorless	None	None	None	None	K.Tanaka, S.Honke, Z.Urbanczyk-Lipkowska, F.Toda
MALGIS	RACEMIC	ND_D_NI	Strict definition of kryptoracemate	KRYPTORACEMIC	NO	P21	4	TRUE	TRUE	9.13	4	1	4	['P']	0	0	2	2	0	[[(2, 'S'), (2, 'R')]]	[2]	[4]	['racemic']	['C1']	4	4	8	RAC-2	contains following chiral atom(s)P	NA	11.9879	19.1972	17.072	90	90.542	90	3928.67	1.11403	C17 H36 N3 O1 P1	N'-t-butyl-N,N''-dicyclohexyl-N-methylphosphoric triamide	175 K	None	None	None	None	None	None	None	M.Keikha, M.Pourayoubi, A.Tarahhomi, A.Van der Lee
[truncated: 78 more rows]
[truncated: 76 more columns]
